# Supplementary material
Source: PubMed Central journal article supplement (PMC4156869)
Supplement: ja504063c_si_001.pdf [file ja504063c_si_001.pdf]

# Changes in Metabolic Chemical-Reporter Structure Yield a Selective Probe of O-GlcNAc Modification

Kelly N. Chuh,<sup>1</sup> Balyn W. Zaro,<sup>1</sup> Friedrich Piller,<sup>2</sup> Véronique Piller,<sup>2</sup> and Matthew R. Pratt<sup>1,3,4</sup>

<sup>1</sup>Department of Chemistry and <sup>3</sup>Department of Molecular and Computational Biology  
University of Southern California, Los Angeles, CA 90089-0744

<sup>2</sup>Centre de Biophysique Moléculaire, CNRS UPR4301, Université d'Orléans and INSERM,  
F45071 Orléans Cedex 2, France

<sup>4</sup>Correspondence should be addressed to [matthew.pratt@usc.edu](mailto:matthew.pratt@usc.edu)

## Supporting Information

### Table of Contents:

|                                                                               |                 |
|-------------------------------------------------------------------------------|-----------------|
| <b>Scheme S1.</b> Synthesis of Ac <sub>3</sub> 6AzGlcNAc.                     | <b>Page S2</b>  |
| <b>Scheme S2.</b> Synthesis of alkyne-azo-biotin                              | <b>Page S2</b>  |
| <b>Scheme S3.</b> Synthesis of 6AzGlcNAc-1-phosphate                          | <b>Page S3</b>  |
| <b>Figure S1.</b> Enrichment of 6AzGlcNAc-labeled proteins                    | <b>Page S3</b>  |
| <b>Figure S2.</b> The GlcNAc salvage pathway.                                 | <b>Page S4</b>  |
| <b>Figure S3.</b> GalK2 knockdown.                                            | <b>Page S5</b>  |
| <b>Figure S4.</b> LC-MS analysis of 6AzGlcNAc-1-phosphate production by AGM1. | <b>Page S5</b>  |
| <b>Figure S5.</b> Labeling of cell-lines by GlcNAz and GalNAz.                | <b>Page S6</b>  |
| <b>Figure S6.</b> Characterization of the specificity of 6AzGlcNAc.           | <b>Page S7</b>  |
| <b>NMR Characterization</b>                                                   | <b>Page S8</b>  |
| <b>Table S1.</b> Proteomic Identification of 6AzGlcNAc-labeled proteins       | <b>Page S21</b> |
| <b>Table S2.</b> Proteomic Identification of GlcNAz-labeled proteins          | <b>Page S31</b> |
| <b>Table S2.</b> Proteomic Identification of GalNAz-labeled proteins          | <b>Page S41</b> |

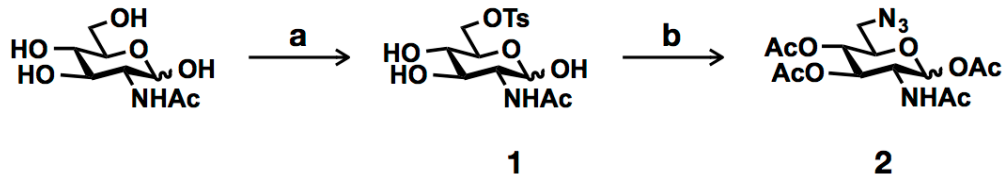

**Scheme S1.** Synthesis of Ac<sub>3</sub>6AzGlcNAc. Reagents: (a) 4-toluenesulfonyl chloride, pyridine, -20 °C, 18 h; (b) NaN<sub>3</sub>, DMF, 50 °C, 3 d; Ac<sub>2</sub>O, pyridine, rt, 16 h, 60% over three steps.

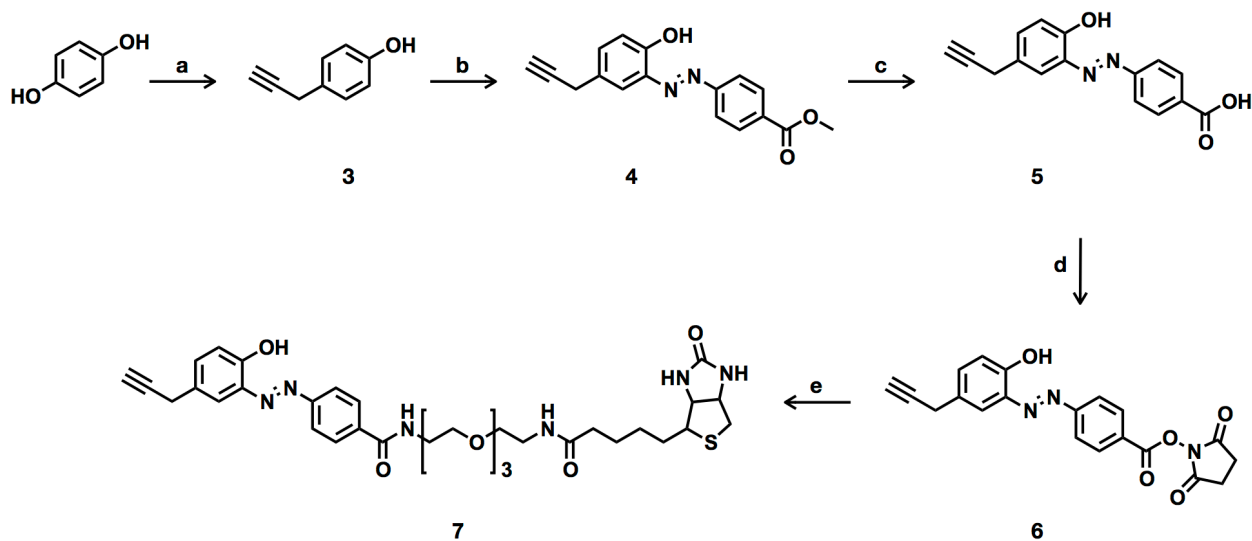

**Scheme S2.** Synthesis of alkyne-azo-biotin. Reagents: (a) propargyl chloride, 0.1 M KOH, EtOH, reflux, 20 h, 28%; (b) i.) NaNO<sub>2</sub>, methyl-4-amino-benzoate, 6 M HCl, K<sub>2</sub>CO<sub>3</sub>, H<sub>2</sub>O:THF (2:1), 0 °C, 30 min; ii.) rt, 18 h, 90%; (c) NaOH, rt, 24 h, 70%; (d) *N*-hydroxysuccinimide, *N,N'*-dicyclohexylcarbodiimide, THF, rt, 18 h, 56%; (e) EZ-link Amine PEG<sub>3</sub>-biotin, DMF, rt, 18 h, 31%.

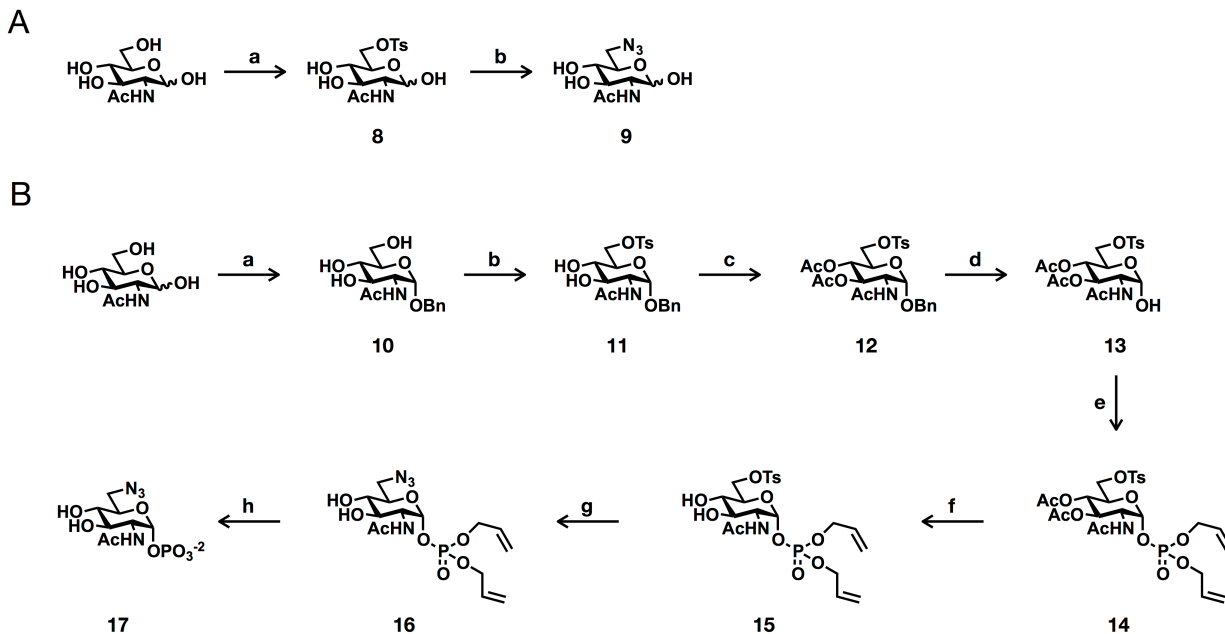

**Scheme S3.** Synthesis of 6AzGlcNAc-1-phosphate. (A) Reagents: (a) *p*-Toluenesulfonyl chloride, pyridine, -20 °C, 16 h; (b) NaN<sub>3</sub>, DMF, 50 °C, 3 d, 14% over two steps. (B) Reagents: (a) benzyl alcohol, concentrated HCl, 75 °C, 4 h, 35%; (b) *p*-toluenesulfonyl chloride, pyridine, -20 °C, 1 h, 52%; (c) acetic anhydride, pyridine, 3 h, quantitative yield; (d) Pd(OH)<sub>2</sub>/C (10% Pd), H<sub>2</sub>, MeOH, 48 h; (e) i) 5-(ethylthio)-1H-tetrazole, diallyl-*N,N'*-diisopropylphosphoramidite, CH<sub>2</sub>Cl<sub>2</sub>, 2 h; ii) *m*-chloroperoxybenzoic acid, CH<sub>2</sub>Cl<sub>2</sub>; -78 °C, 10 min, 74% over 2 steps; (f) sodium methoxide, MeOH, 1.5 h, 57%; (g) sodium azide, DMF, 48 h, 71%; (h) *p*-toluenesulfinic acid sodium salt, tetrakis(triphenylphosphine)-Palladium(0), 4 d, 99%.

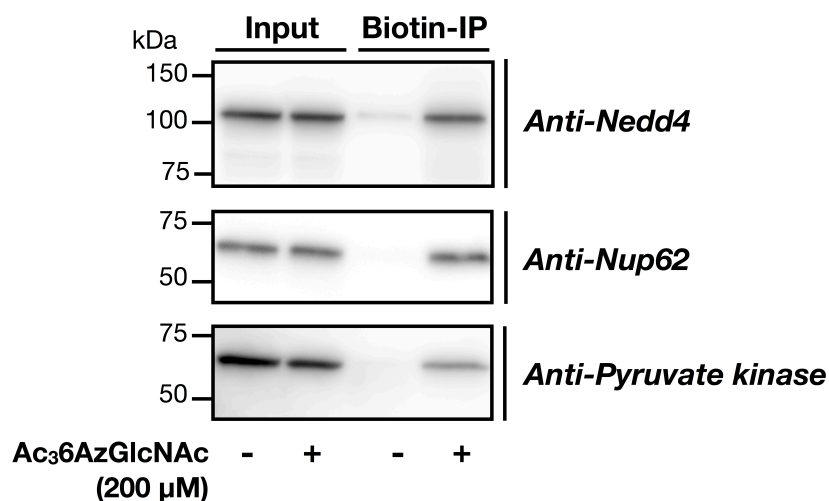

**Figure S1.** NIH3T3 cells were treated with Ac<sub>3</sub>6AzGlcNAc (200 μM) or DMSO vehicle for 16 hours. Following lysis and CuAAC with alkyne-azo-biotin samples were analyzed by Western blotting with the indicated antibodies.

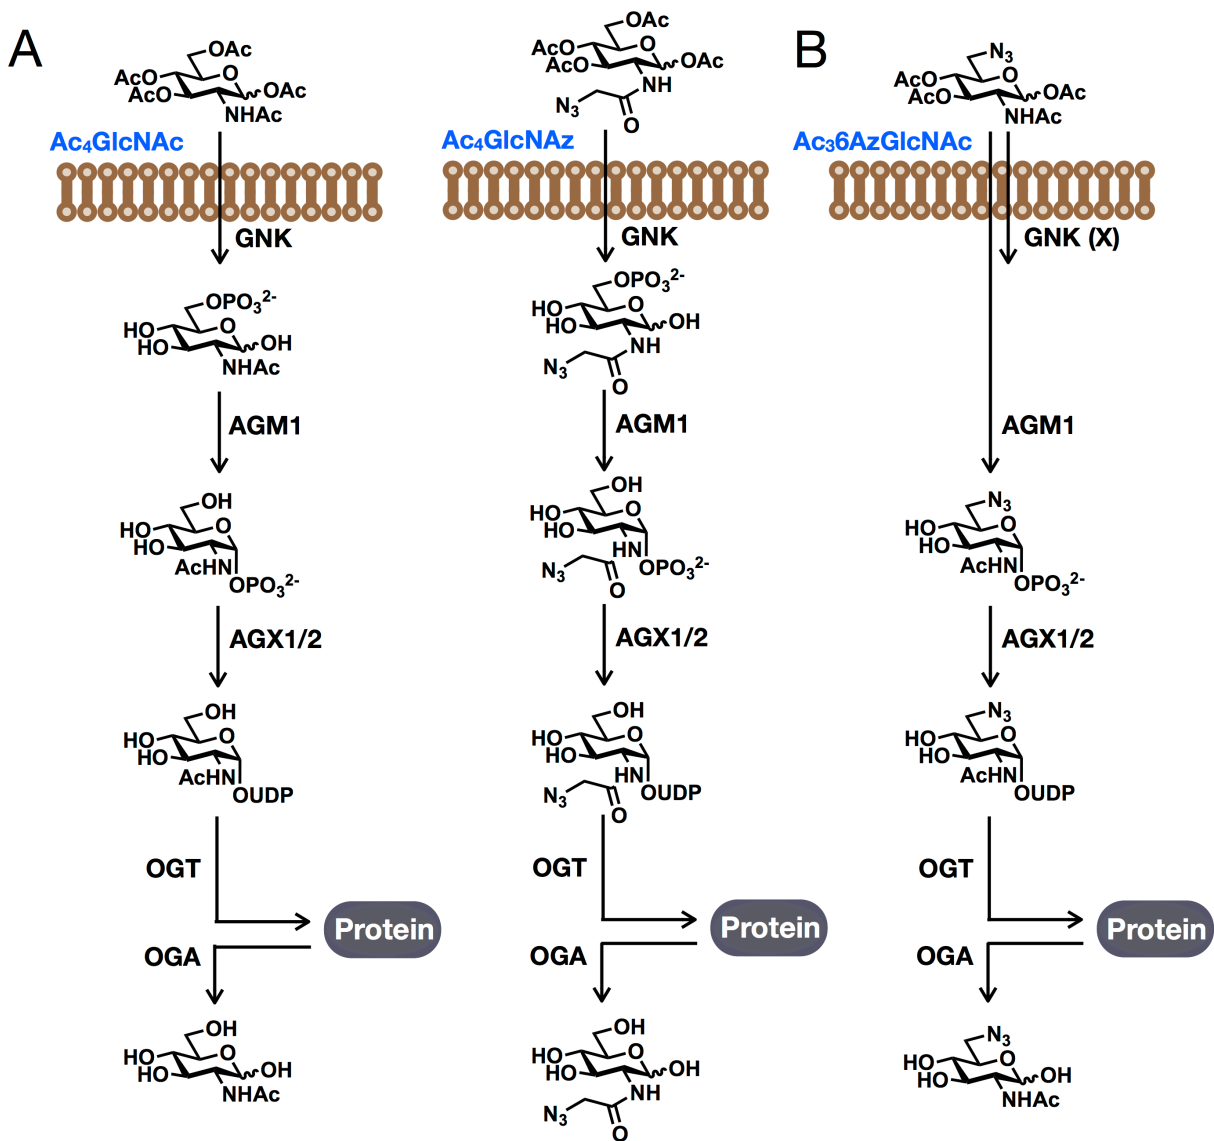

**Figure S2.** The GlcNAc salvage pathway. (A) Peracetylated GlcNAc accesses the HBP through the GlcNAc salvage pathway. Ac<sub>4</sub>GlcNAz is accepted by these enzymes and is ultimately transformed into the UDP donor sugar the which is utilized by OGT to modify protein substrates. (B) 6AzGlcNAc cannot be phosphorylated at the 6-position by GNK. We demonstrate that 6AzGlcNAc can be directly transformed to 6AzGlcNAc-1-phosphate by AGM1 and subsequently transformed to UDP-6AzGlcNAc by AGX1.

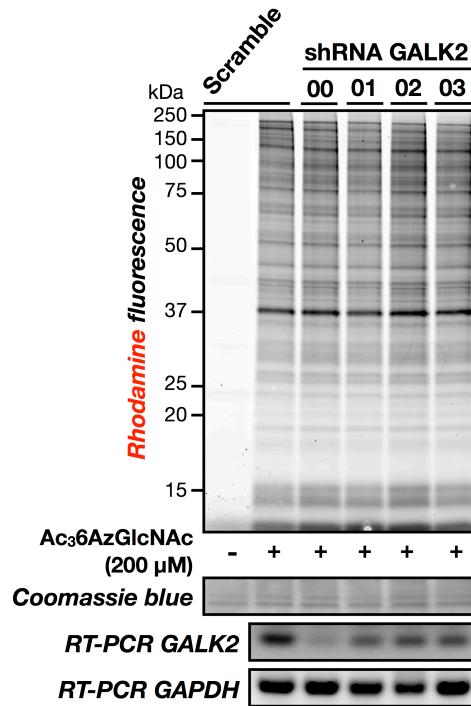

**Figure S3.** Galactosamine kinase (GalK2) knockdown. Cell-lines with stable knockdown (shRNA) of GalK2 were treated with 6AzGlcNAc (200 μM) for 16 hours before visualization by in-gel fluorescence.

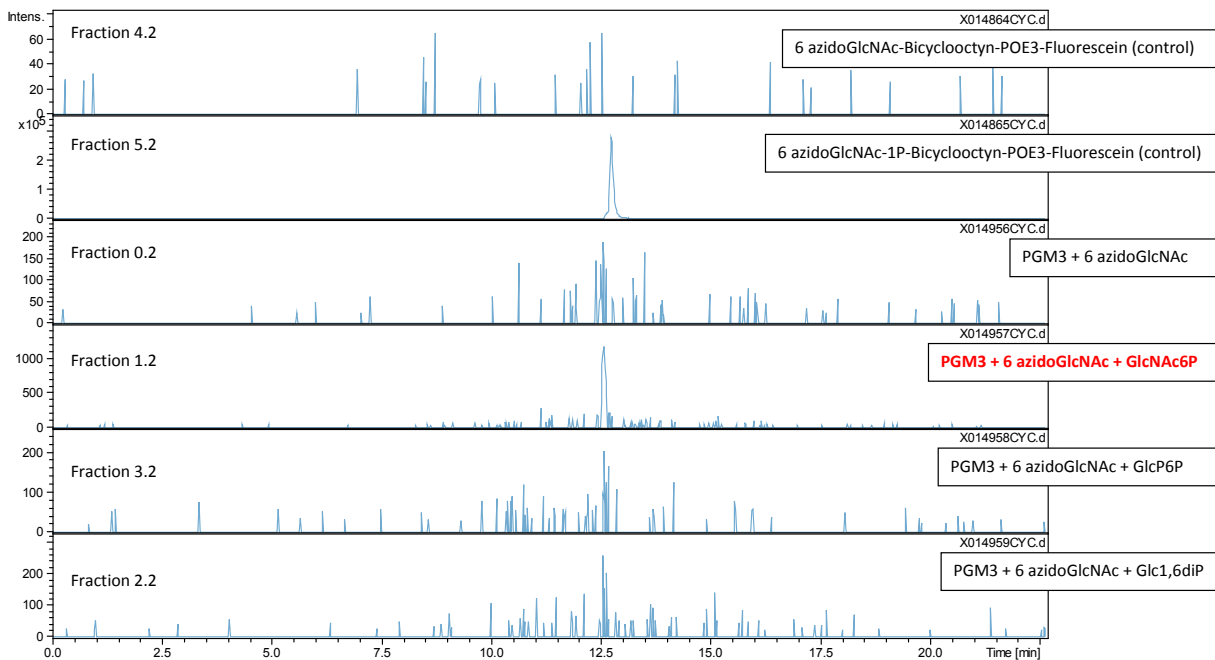

**Figure S4.** LC-MS analysis of 6AzGlcNAc-1-phosphate production by AGM1. AGM1 enzymatic reactions were subjected to copper-free click chemistry with bicyclooctyn-POE3-fluorescein and subjected to separation by paper chromatography. Fluorescent spots were eluted and analyzed using LC-ESI-MS. Ions corresponding to the fluorescein-conjugated 6AzGlcNAc-1-phosphate (most intense isotope of the double-charged ion) were extracted (blue trace). Only in the presence of AGM1 (PGM3) and GlcNAc-6-phosphate is the formation of 6AzGlcNAc-1-phosphate observed. Units on the y-axis are not uniform.

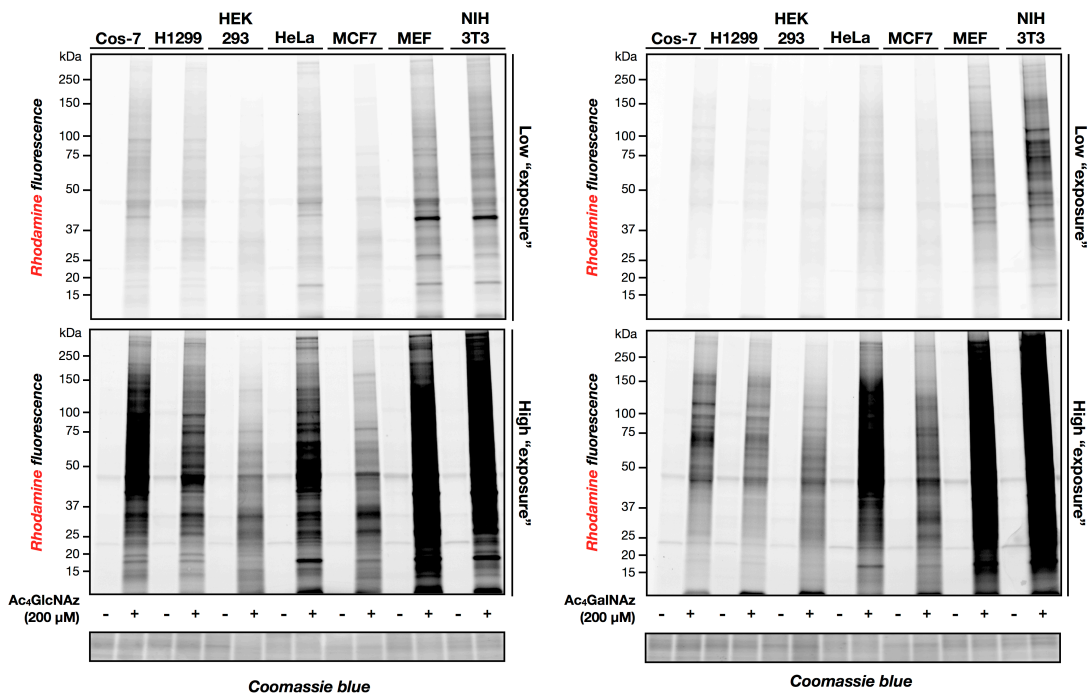

**Figure S5.** Labeling of cell-lines by GlcNAz and GalNAz. The indicated cell-lines were treated with  $200 \mu\text{M}$   $\text{Ac}_4\text{GlcNAz}$  or  $\text{Ac}_4\text{GalNAz}$  for 16 hours before modified proteins were subjected to CuAAC with alk-rho and analysis by in-gel fluorescence scanning.

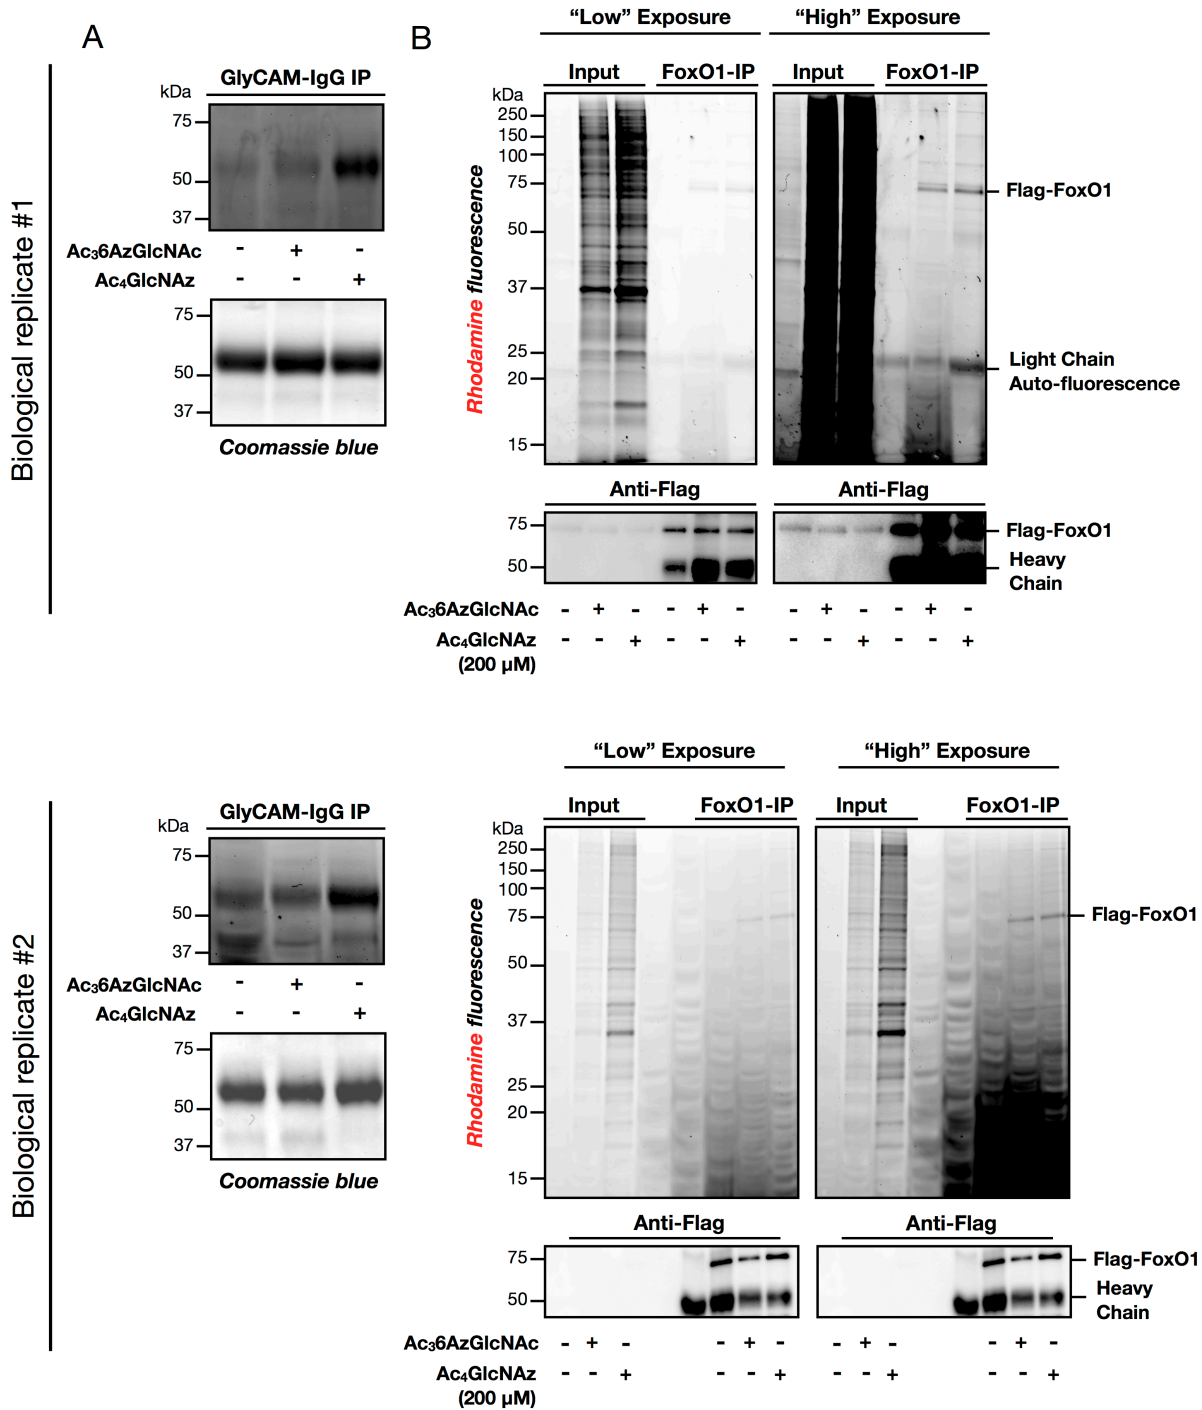

**Figure S6.** Characterization of the specificity of 6AzGlcNAc. (A) NIH3T3 cells stably expressing GlyCAM-IgG were treated with Ac<sub>3</sub>6AzGlcNAc (200 μM), Ac<sub>4</sub>GlcNAz (200 μM) or Ac<sub>4</sub>GlcNAc (200 μM) for 24 h. Cells were then lysed and immunoprecipitated using recombinant protein G sepharose beads. Resulting samples were subjected to CuAAC with alkyne-rhodamine and analyzed by in-gel fluorescence scanning. (B) NIH3T3 cells stably expressing Flag-tagged FoxO1 were treated with Ac<sub>3</sub>6AzGlcNAc (200 μM), Ac<sub>4</sub>GlcNAz (200 μM) or Ac<sub>4</sub>GlcNAc (200 μM) for 16 h. Cells were lysed and immunoprecipitated. Flag-tagged Foxo1 was eluted from the beads and subjected to CuAAC with alkyne-rhodamine followed by analysis by in-gel fluorescence scanning and Western blotting.

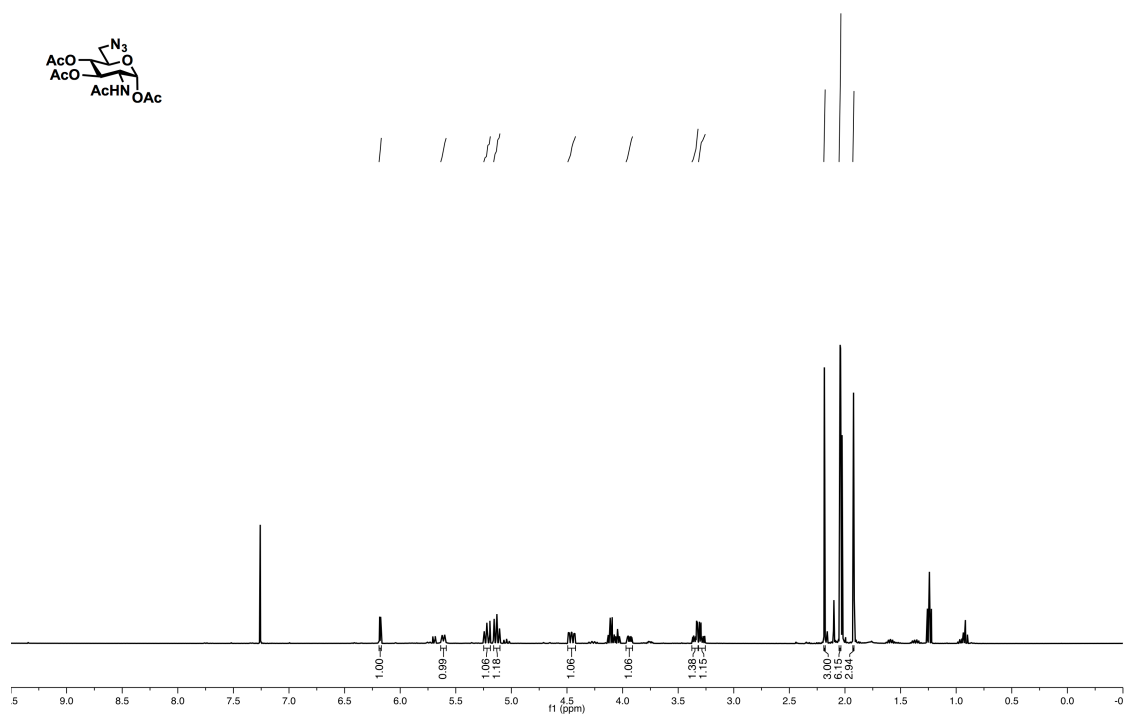

**Figure S7.** 1,3,4-Tri-O-acetyl-6-azido-6-deoxy-N-acetyl-glucosamine ( $\text{Ac}_3\text{6AzGlcNAc}$ , **2**)



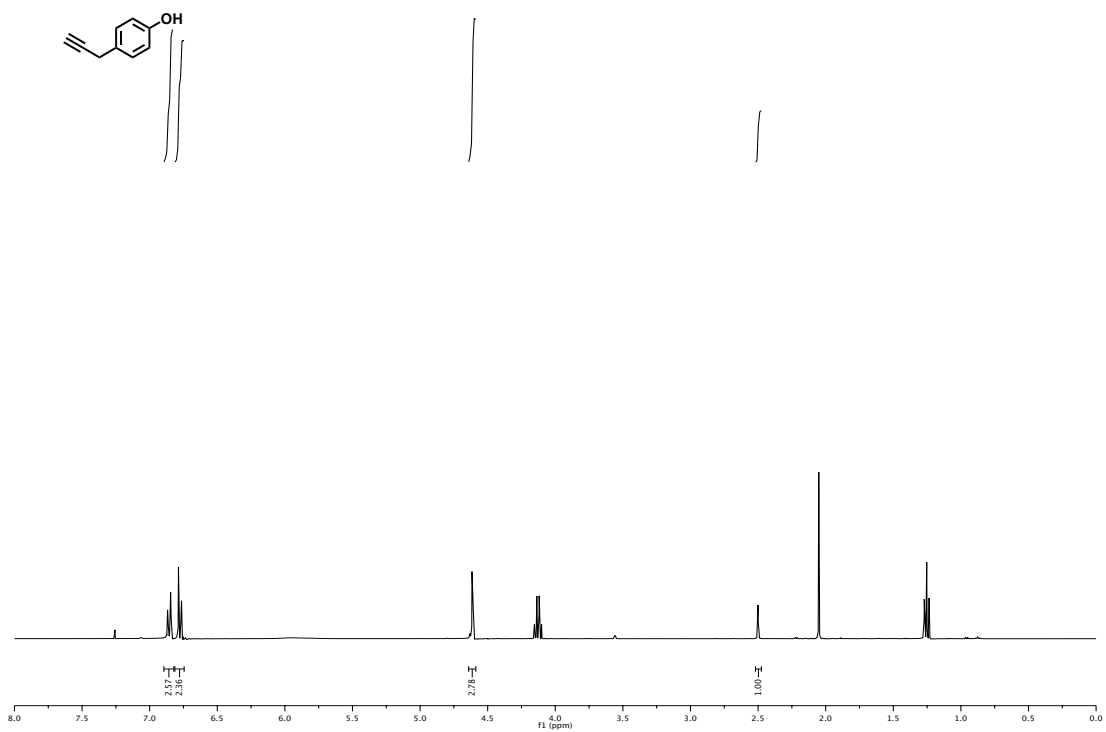

**Figure S8.** 4-(prop-2-yn-1-yl)phenol (**3**)

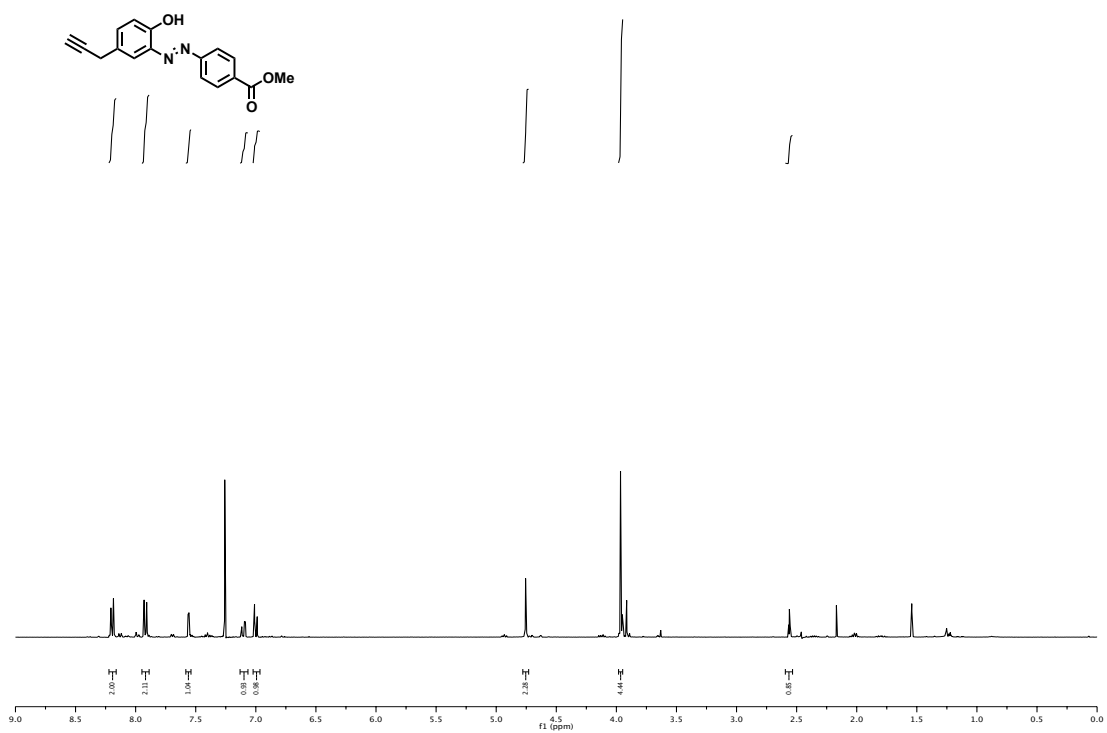

**Figure S9.** (E)-methyl 4-((2-hydroxy-5-(prop-2-yn-1-yl)phenyl)diazenyl)benzoate (**4**)

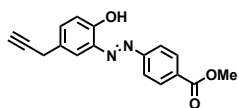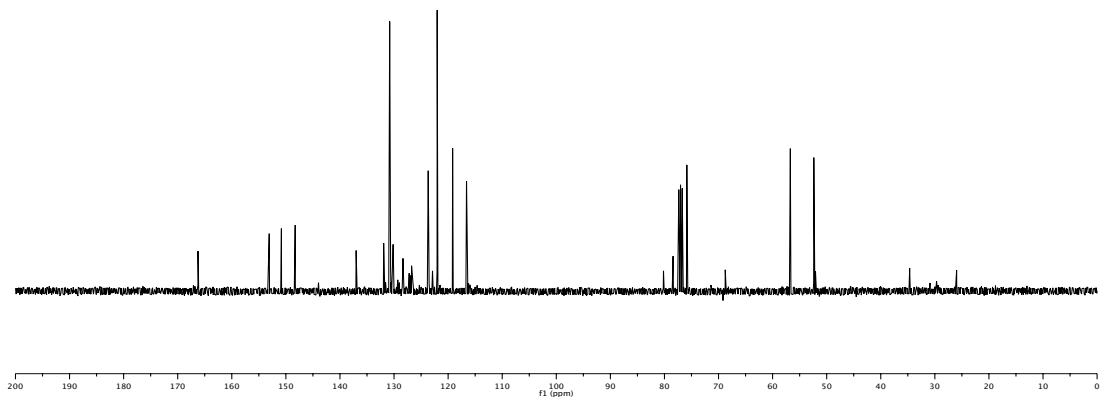

Figure S10. (E)-methyl 4-((2-hydroxy-5-(prop-2-yn-1-yl)phenyl)diazenyl)benzoate (**4**)

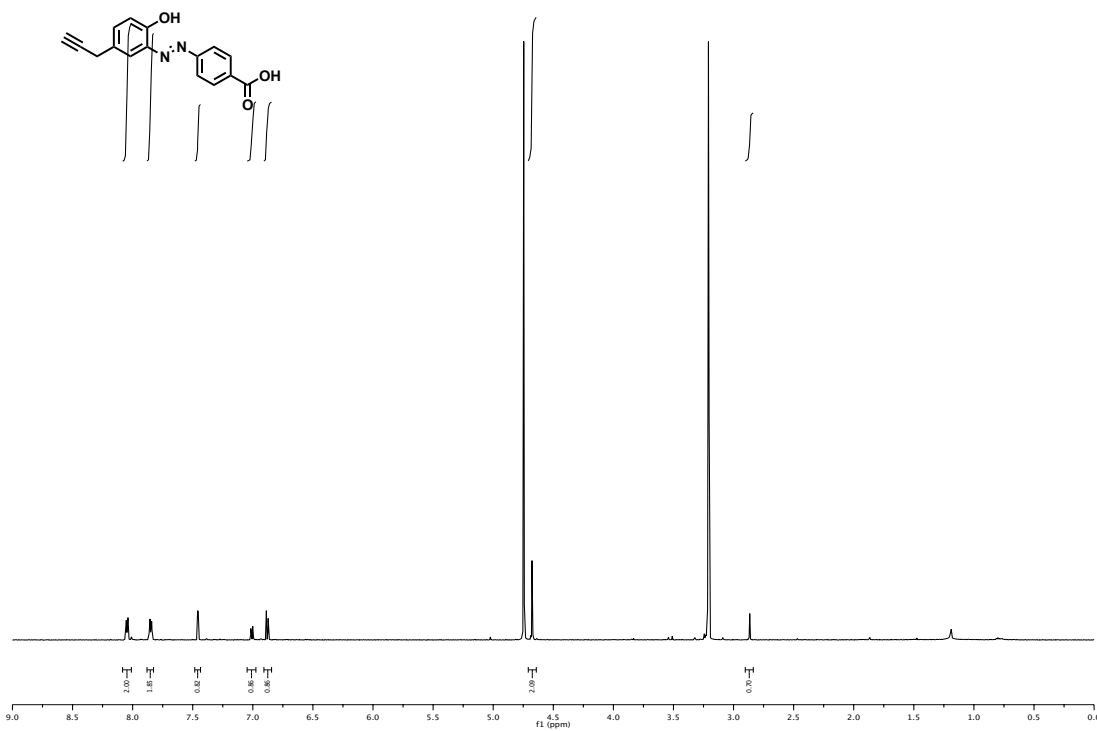

Figure S11. 4-((2-hydroxy-5-(prop-2-yn-1-yl)phenyl)diazenyl)benzoic acid (**5**)

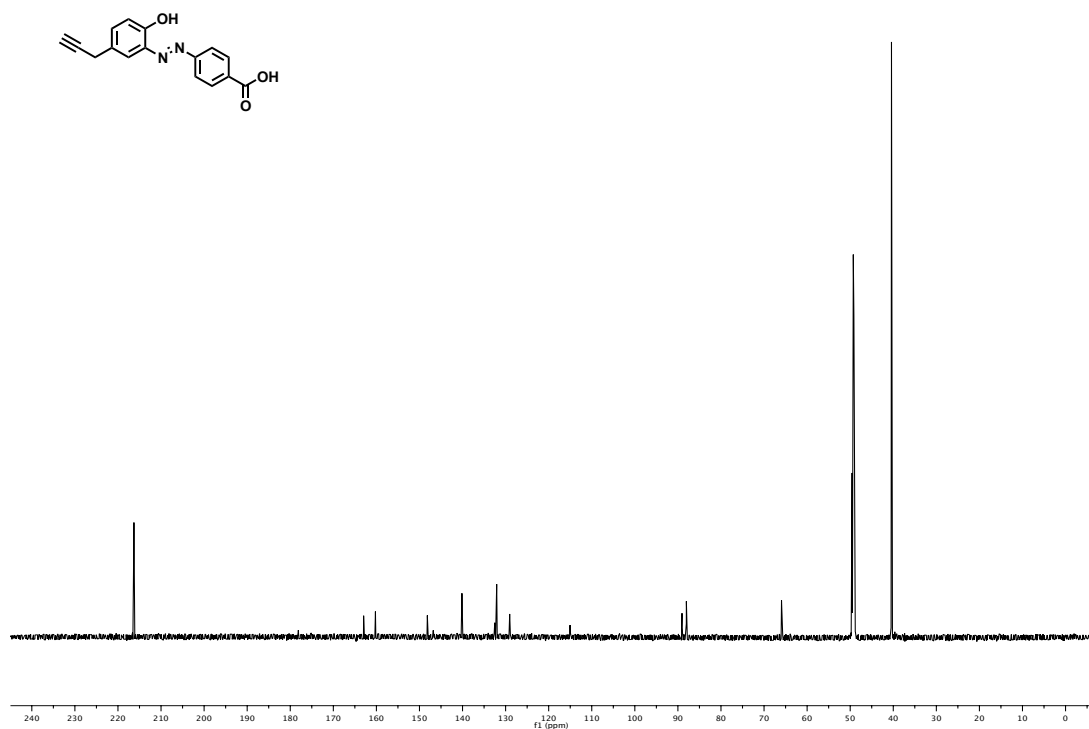

Figure S12. (E)-4-((2-hydroxy-5-(prop-2-yn-1-yl)phenyl)diazenyl)benzoic acid (**5**)

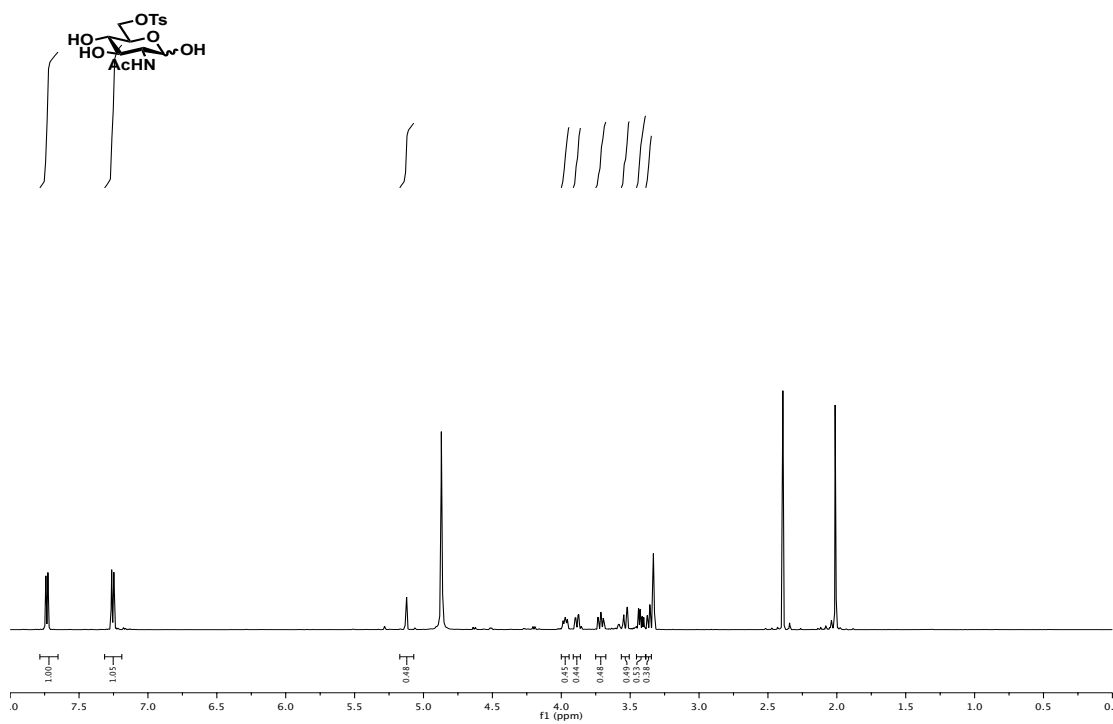

Figure S13. 6-O-p-methylbenzenesulfonate-N-acetyl-glucosamine (**8**)

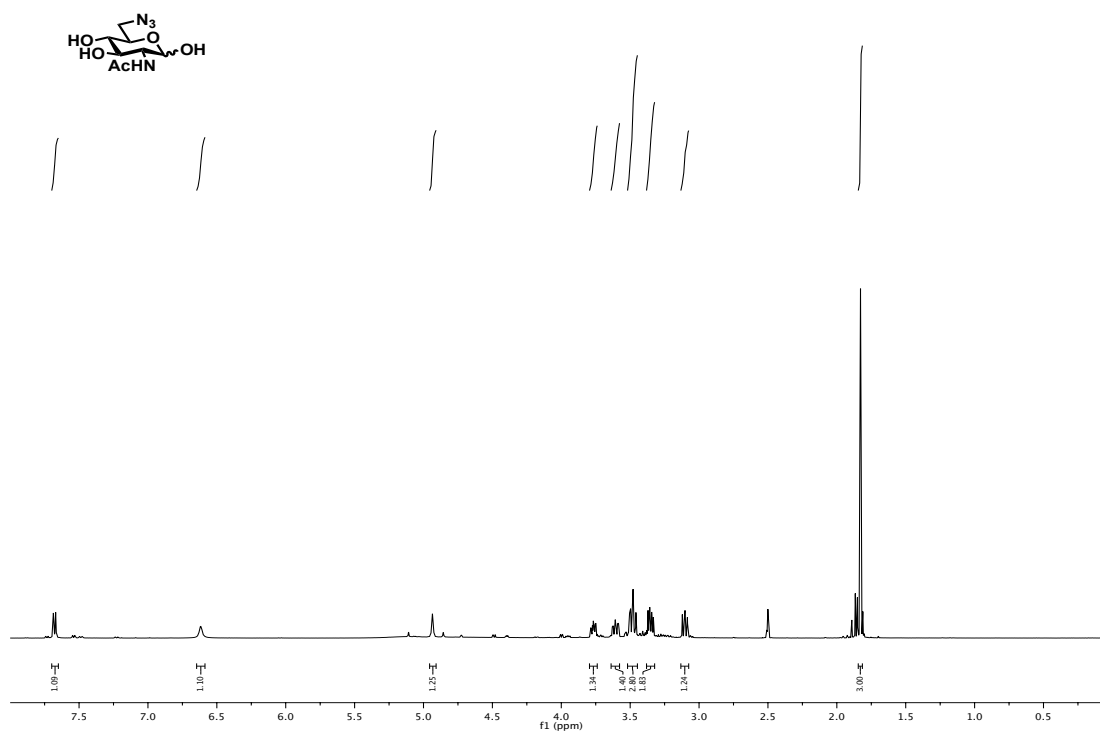

Figure S14. 6-azido-6-deoxy-N-acetyl-glucosamine (6AzGlcNAc, **9**)

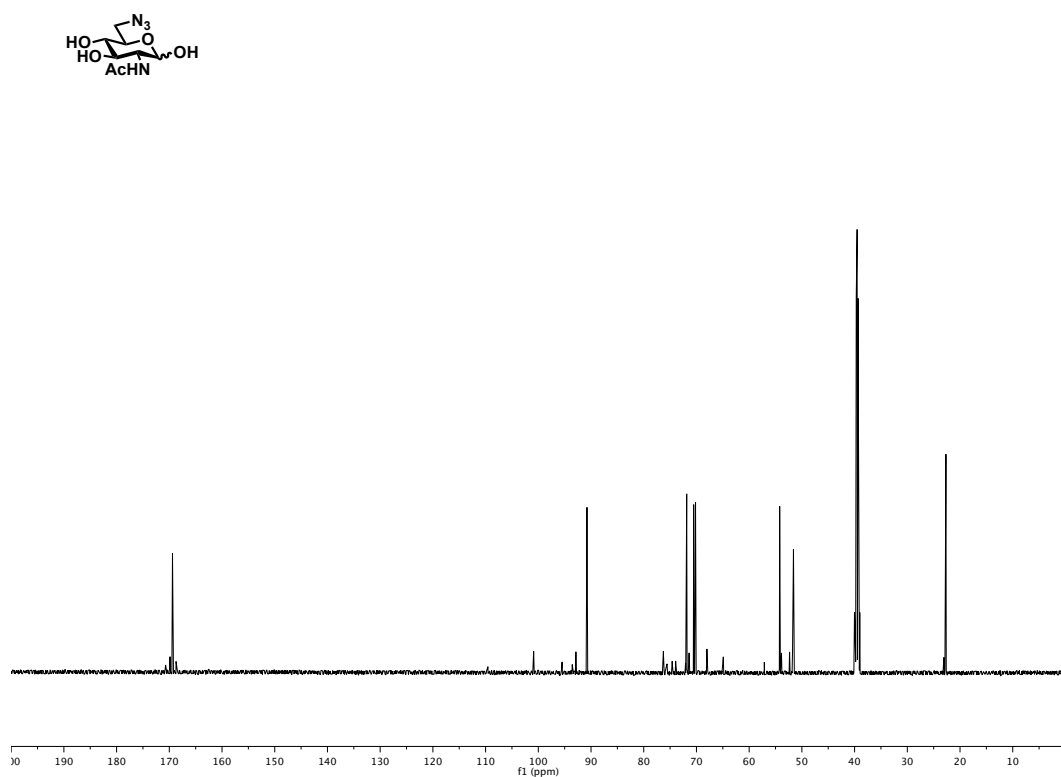

Figure S15. 6-azido-6-deoxy-N-acetyl-glucosamine (6AzGlcNAc, **9**)

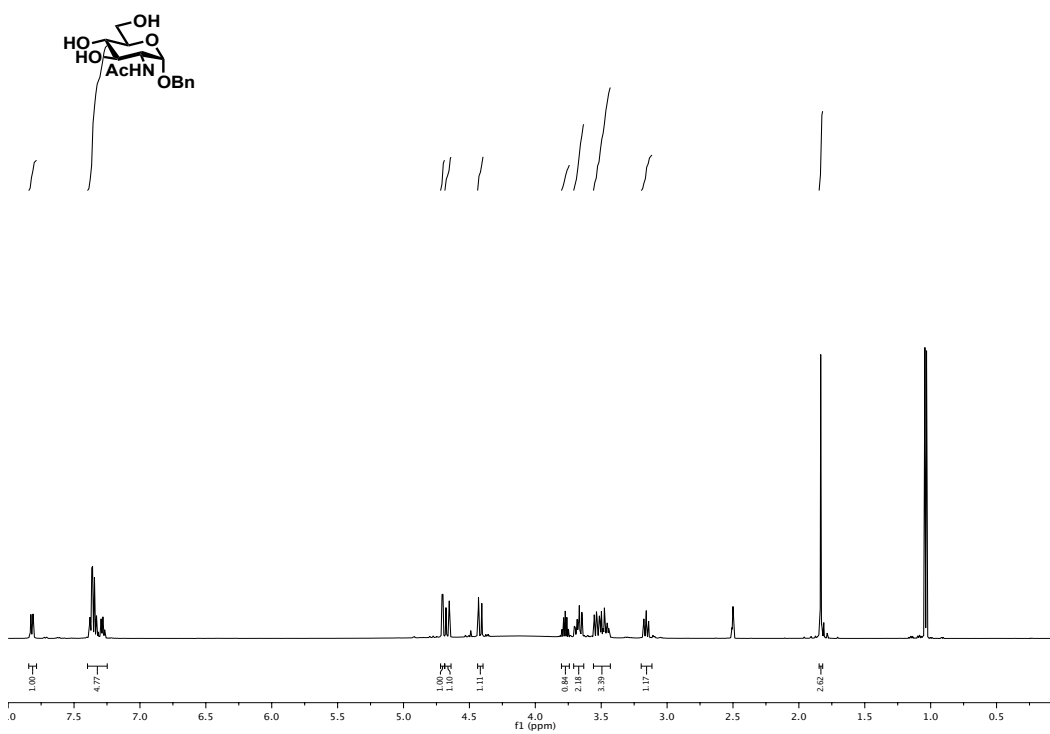

Figure S16.  $\alpha$ -1-O-benzyl-N-acetyl-glucosamine (**10**)

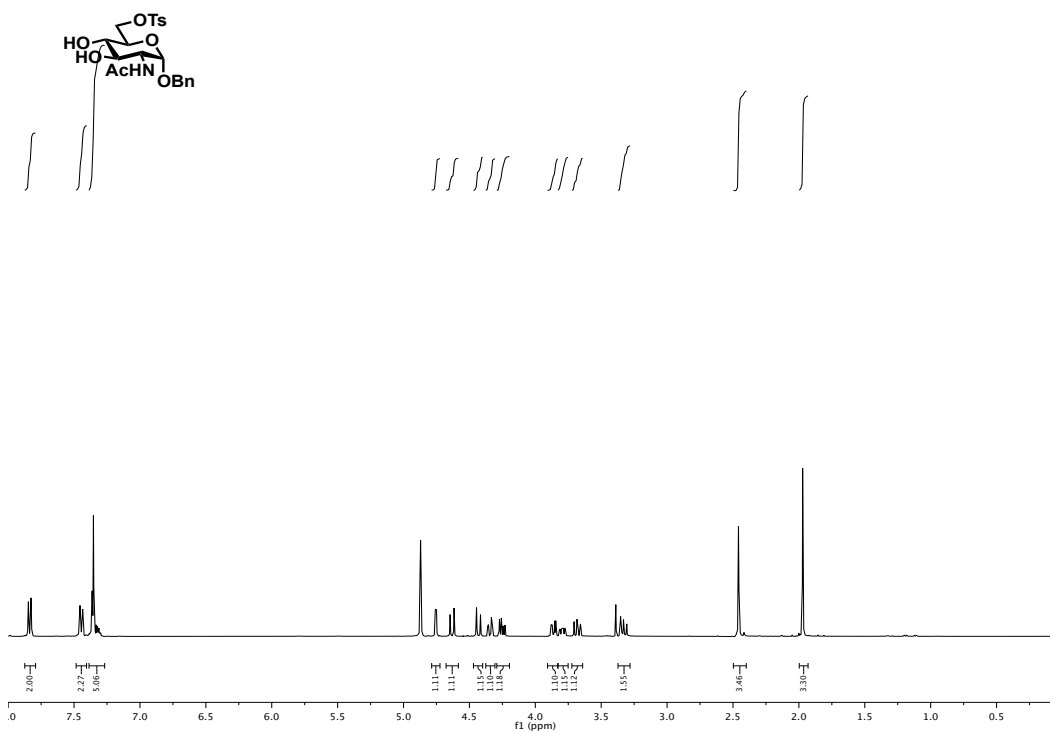

Figure S17.  $\alpha$ -1-O-benzyl-6-O-p-methylbenzenesulfonate-N-acetyl-glucosamine (**11**)

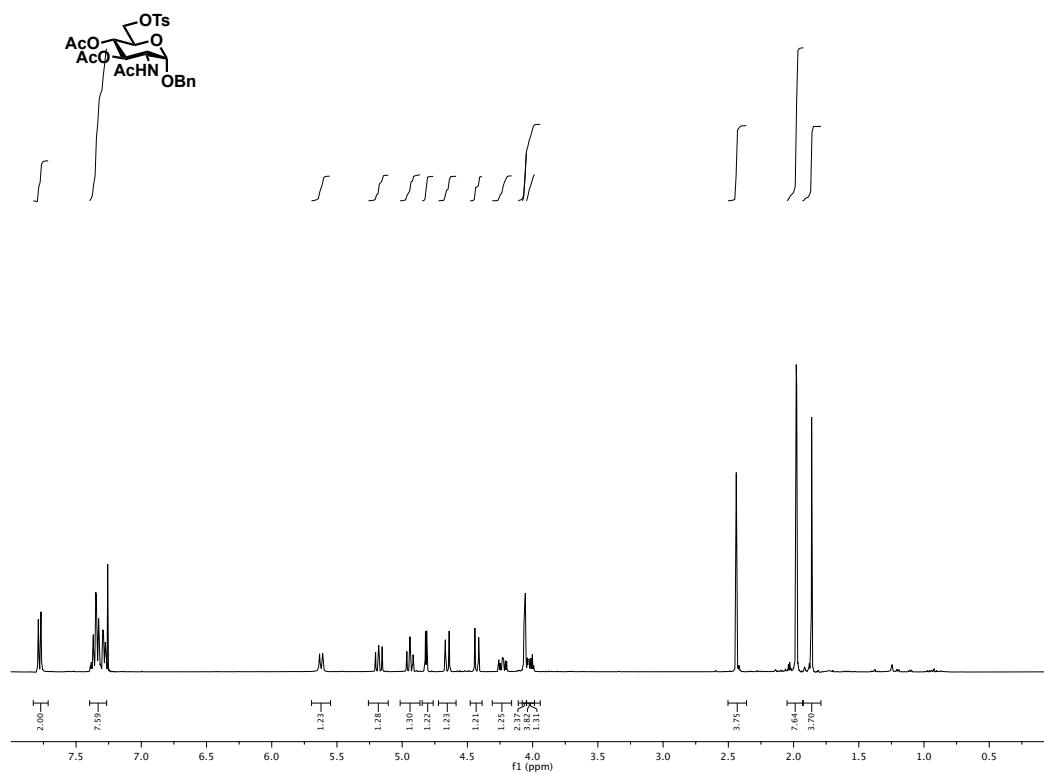

**Figure S18.** 3,4-di-O-acetyl- $\alpha$ -1-O-benzyl-6-O-p-methylbenzenesulfonate-N-acetylglucosamine (12)

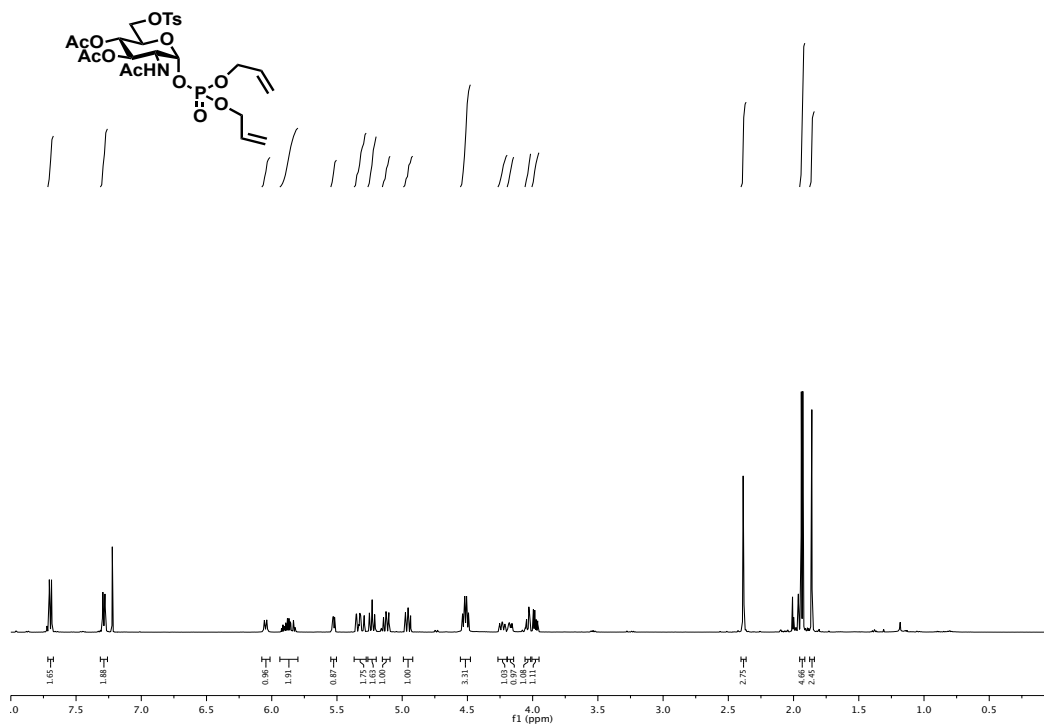

**Figure S19.** Diallyl(3,4-di-O-acetyl-6-O-p-methylbenzenesulfonate-N-acetylglucosamine)- $\alpha$ -1-phosphate (14)

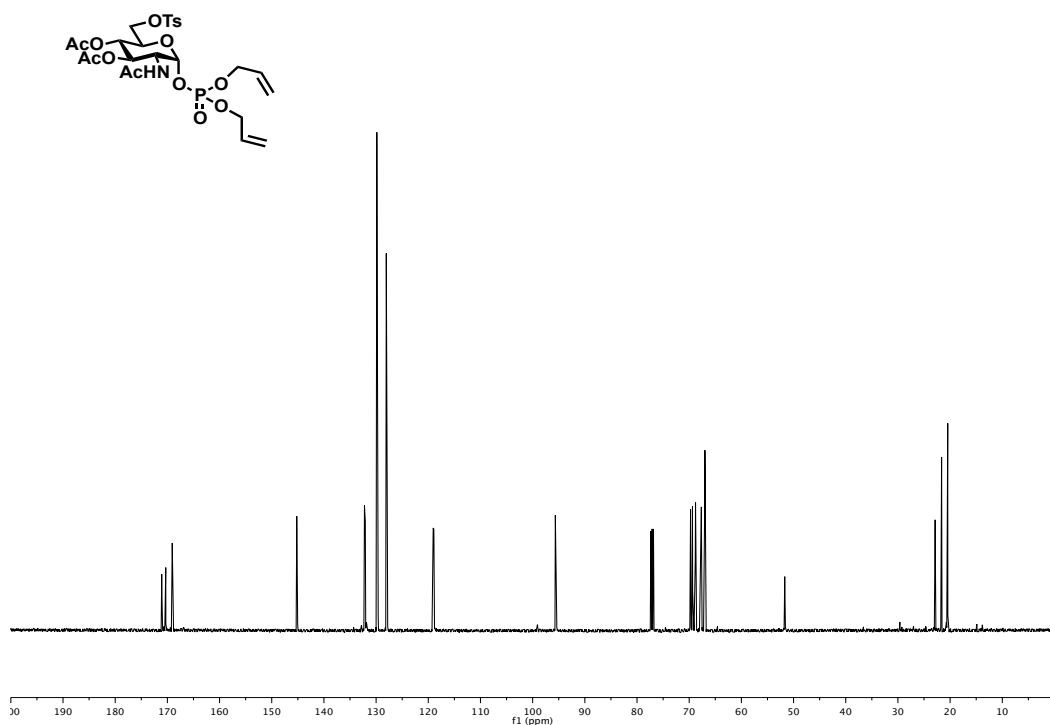

**Figure S20.** Diallyl(3,4-di-O-acetyl-6-O-p-methylbenzenesulfonate-N-acetyl-glucosamine)- $\alpha$ -1-phosphate (14)

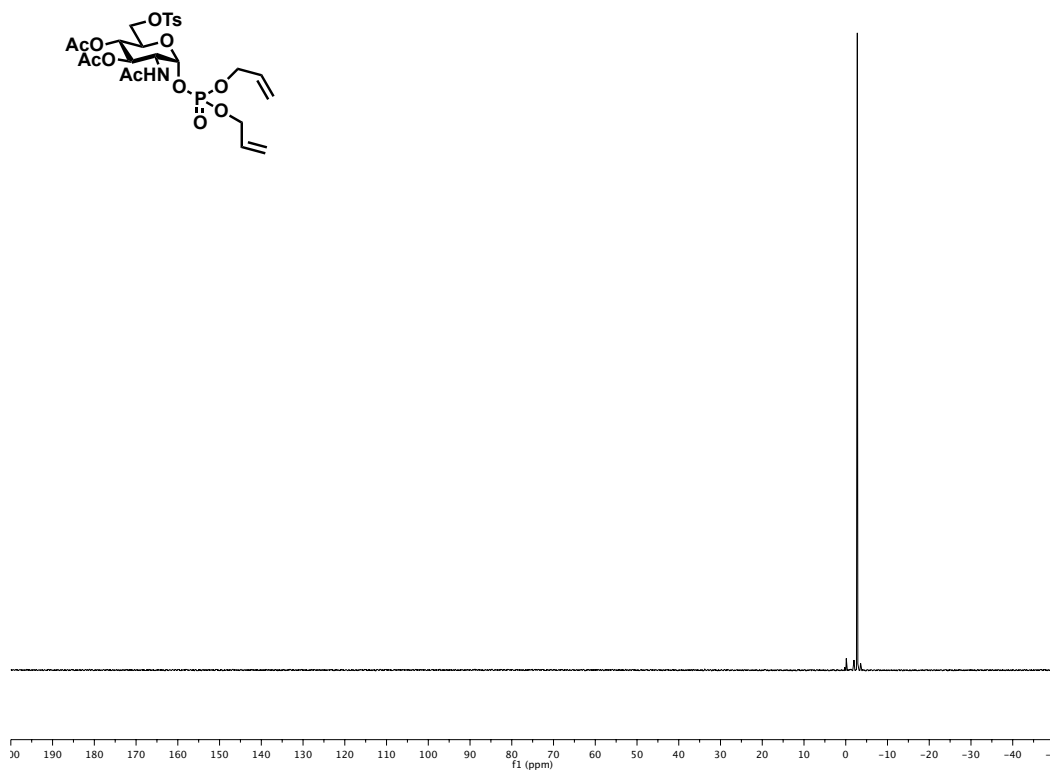

**Figure S21.** Diallyl(3,4-di-O-acetyl-6-O-p-methylbenzenesulfonate-N-acetyl-glucosamine)- $\alpha$ -1-phosphate (14)

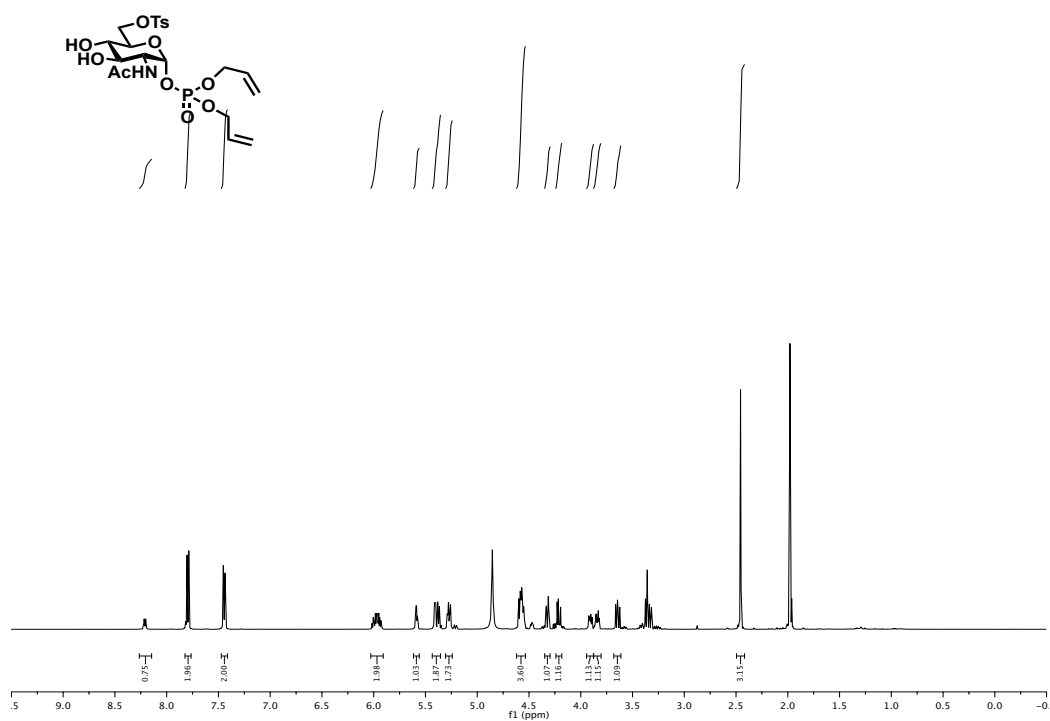

Figure S22. Diallyl(6-O-p-methylbenzenesulfonate-N-acetyl-glucosamine)- $\alpha$ -1-phosphate (**15**)

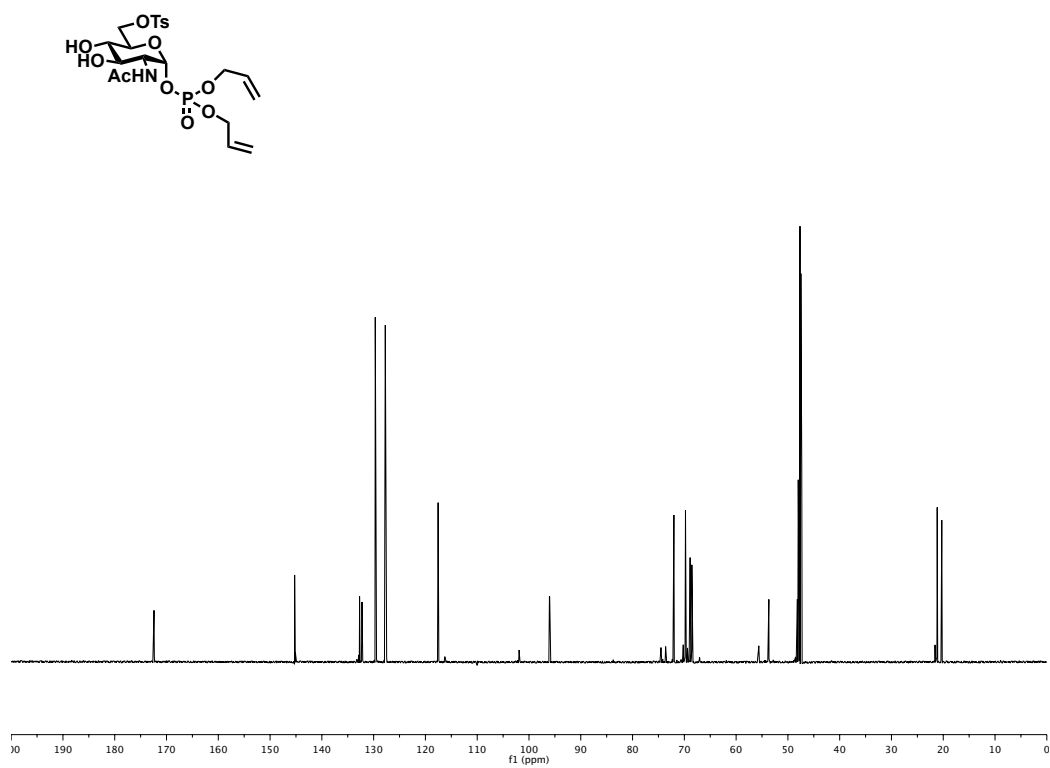

Figure S23. Diallyl(6-O-p-methylbenzenesulfonate-N-acetyl-glucosamine)- $\alpha$ -1-phosphate (**15**)



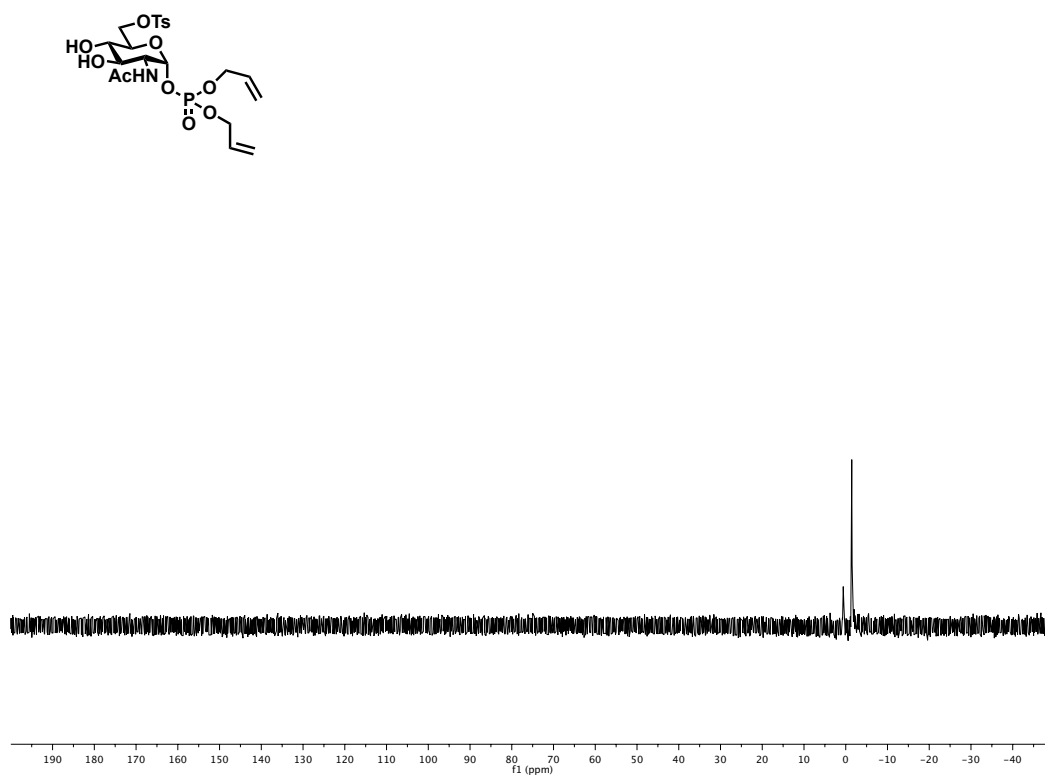

**Figure S24.** Diallyl(6-O-p-methylbenzenesulfonate-N-acetyl-glucosamine)- $\alpha$ -1-phosphate (**15**)

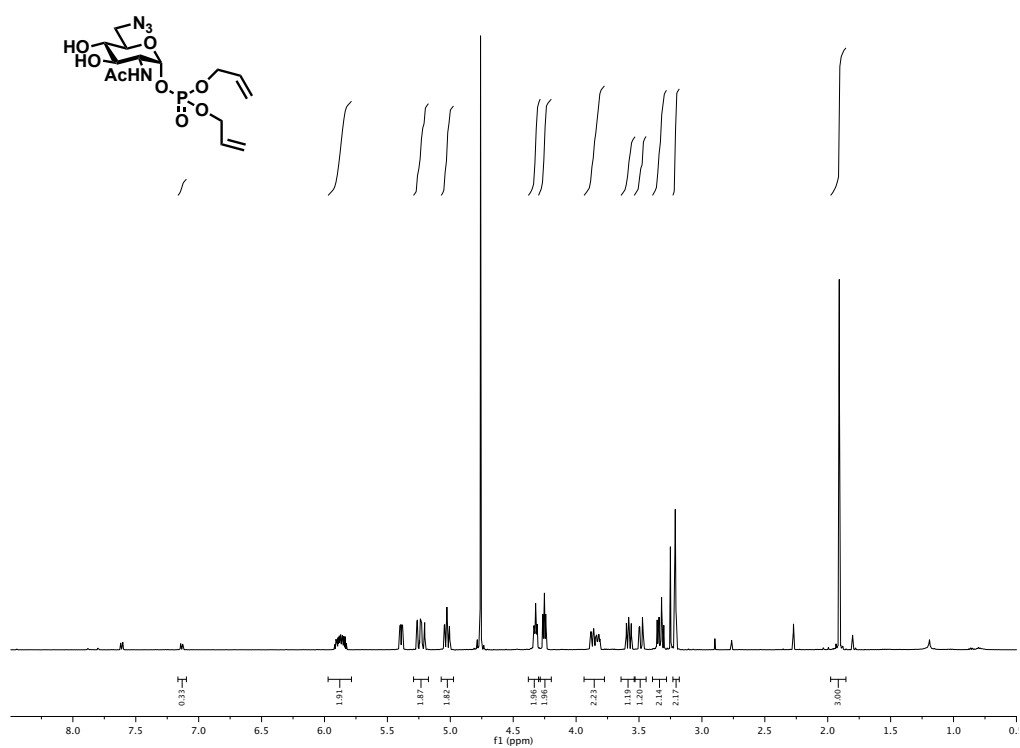

**Figure S25.** Diallyl(6-azido-6-deoxy-N-acetyl-glucosamine)- $\alpha$ -1-phosphate (**16**)

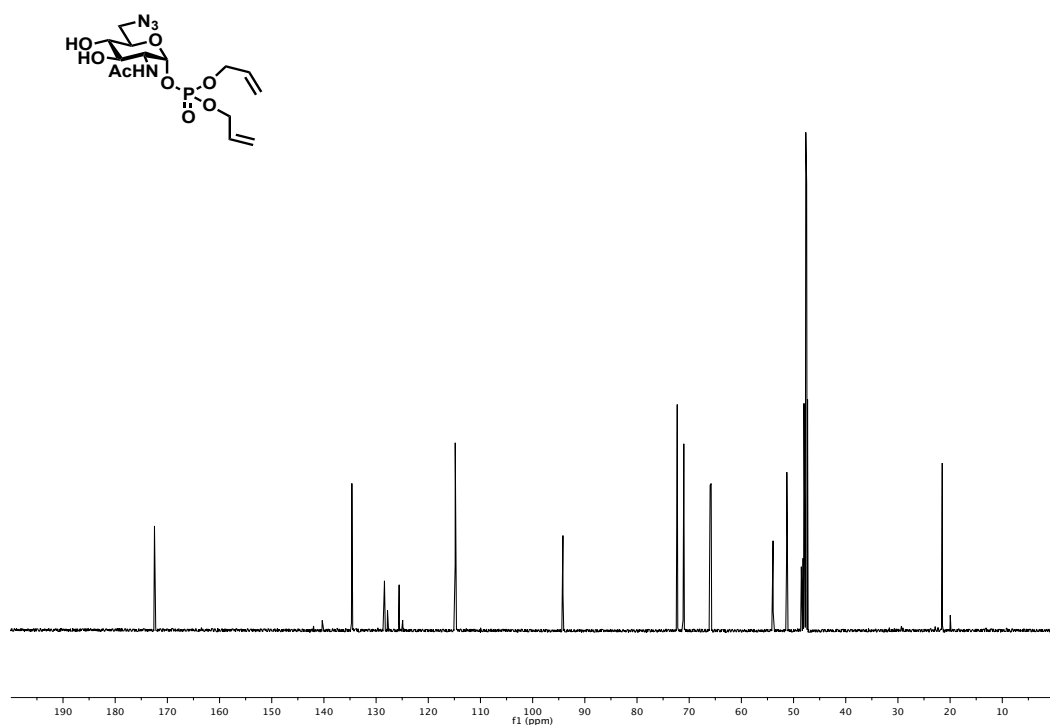

**Figure S26.** Diallyl(6-azido-6-deoxy-N-acetyl-glucosamine)- $\alpha$ -1-phosphate (16)

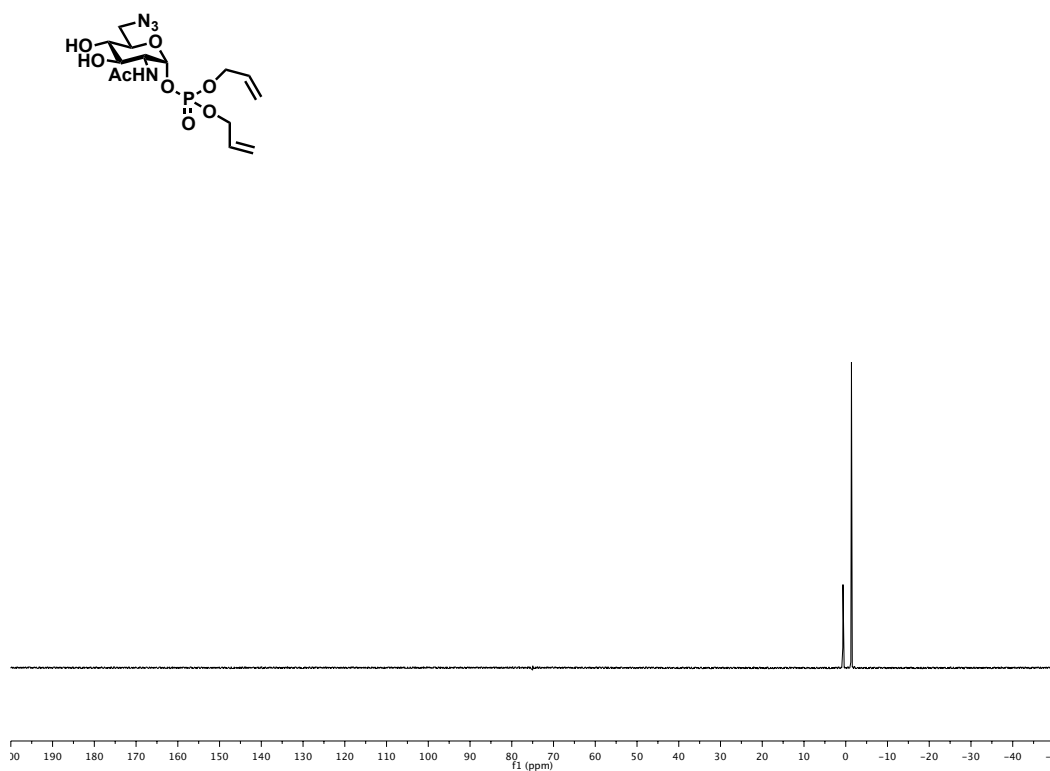

**Figure S27.** Diallyl(6-azido-6-deoxy-N-acetyl-glucosamine)- $\alpha$ -1-phosphate (16)

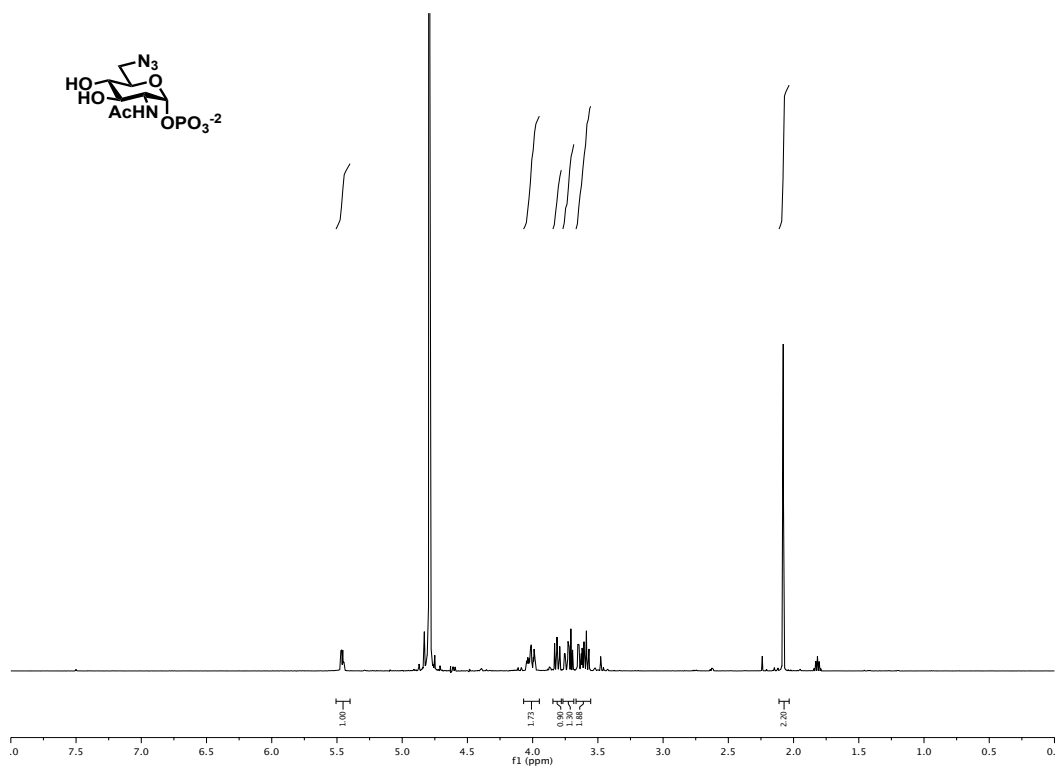

**Figure S28.** 6-azido-6-deoxy-N-acetyl-glucosamine-1-phosphate (**17**)

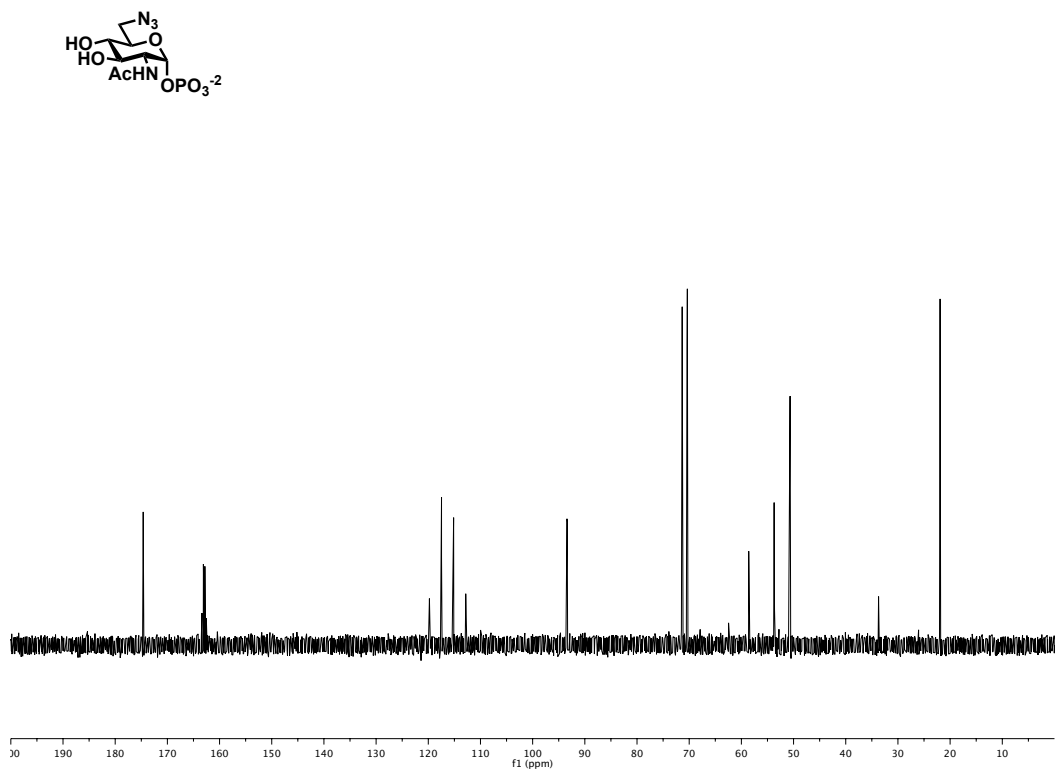

**Figure S29.** 6-azido-6-deoxy-N-acetyl-glucosamine-1-phosphate (**17**)

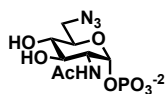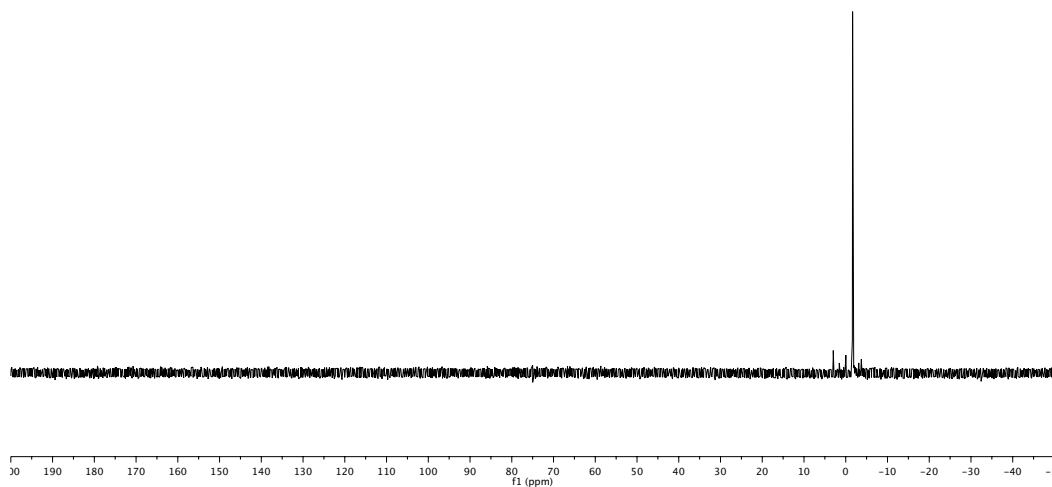

Figure S30. 6-azido-6-deoxy-N-acetyl-glucosamine-1-phosphate (17)

**Supplementary Table 1.** Proteins identified using 6AzGlcNAc enrichment. NIH 3T3 were treated in triplicate with either Ac<sub>3</sub>6AzGlcNAc (200 μM, +) or Ac<sub>4</sub>GlcNAc (200 μM, -) for 16 hours. At this time the cell lysates were subjected to CuAAC with alkyne-biotin, followed by enrichment with streptavidin beads and on-bead trypsinolysis. Labeled proteins were selected as those that were represented by at least 1 unique-peptide in each Ac<sub>3</sub>6AzGlcNAc treated sample, a total of at least 3 spectral-counts from the same three samples, and at least a total of 3 times more spectral counts in the Ac<sub>3</sub>6AzGlcNAc treated samples compared to Ac<sub>4</sub>GlcNAc. Blue indicates proteins previously identified in O-GlcNAc proteomic studies, purple indicates proteins identified in both O-GlcNAc and mucin O-linked proteomic studies and red indicates proteins identified in only O-linked mucin proteomic studies. Novel proteins that were identified in this study are indicated in white.

| No | Accession | Gene   | Description                                                          | 6AzGlcNAc       |               |               |     |   |    |   |     | Enrichment Ratio | t-test    | MW [kDa] | Localization  |                                               |        |        | Previous O-GlcNAc Proteomics Identification | Previous Mucin Proteomics Identification |                     |      |
|----|-----------|--------|----------------------------------------------------------------------|-----------------|---------------|---------------|-----|---|----|---|-----|------------------|-----------|----------|---------------|-----------------------------------------------|--------|--------|---------------------------------------------|------------------------------------------|---------------------|------|
|    |           |        |                                                                      | Spectral Counts |               |               |     |   |    |   |     |                  |           |          | Intracellular | Exclusively Extracellular, Lysosomal, Luminal | GlcNAz | GalNAz |                                             |                                          |                     |      |
|    |           |        |                                                                      | Ex-periment 1   | Ex-periment 2 | Ex-periment 3 | Sum | - | +  | - | +   |                  |           |          |               |                                               |        |        |                                             |                                          | -                   | +    |
| 1  | P27546-2  | MAP4   | Isoform 2 of Microtubule-associated protein 4                        | 0               | 31            | 0             | 37  | 0 | 35 | 0 | 103 | N/A              | 4.107E-05 | 117      | ✓             |                                               | ✓      | ✓      | (9)(19)(23)(26)                             |                                          |                     |      |
| 2  | P58871    | TB182  | 182 kDa tankyrase-1-binding protein                                  | 0               | 23            | 0             | 24  | 0 | 25 | 0 | 72  | N/A              | 2.002E-06 | 182      | ✓             |                                               | ✓      | ✓      | (1)(20)(23)(26)                             |                                          |                     |      |
| 3  | Q3THK7    | GUAA   | GMP synthase [glutamine-hydrolyzing]                                 | 0               | 19            | 0             | 19  | 0 | 21 | 0 | 59  | N/A              | 7.862E-06 | 76.7     | ✓             |                                               | ✓      |        | (26)                                        |                                          |                     |      |
| 4  | Q9QUR6    | PPCE   | Prolyl endopeptidase                                                 | 0               | 15            | 0             | 22  | 0 | 17 | 0 | 54  | N/A              | 9.839E-04 | 80.7     | ✓             |                                               | ✓      |        | (26)                                        | (17)                                     |                     |      |
| 5  | P40124    | CAP1   | Adenylyl cyclase-associated protein 1                                | 0               | 18            | 0             | 15  | 0 | 20 | 0 | 53  | N/A              | 2.626E-04 | 51.5     |               |                                               | ✓      | ✓      | ✓                                           | (9)(23)(26)                              |                     |      |
| 6  | Q3UZ39    | LRRF1  | Leucine-rich repeat flightless-interacting protein 1                 | 0               | 15            | 0             | 20  | 0 | 15 | 0 | 50  | N/A              | 5.620E-04 | 79.2     | ✓             |                                               | ✓      |        |                                             | (23)(26)                                 |                     |      |
| 7  | Q61584-5  | FXR1   | Isoform D of Fragile X mental retardation syndrome-related protein 1 | 0               | 17            | 0             | 17  | 0 | 13 | 0 | 47  | N/A              | 3.001E-04 | 69.7     | ✓             |                                               | ✓      |        |                                             | (9)                                      |                     |      |
| 8  | P30416    | FKBP4  | Peptidyl-prolyl cis-trans isomerase FKBP4                            | 0               | 16            | 0             | 16  | 0 | 13 | 0 | 45  | N/A              | 1.151E-04 | 51.5     | ✓             |                                               | ✓      |        |                                             | (5)(9)(23)(26)                           |                     |      |
| 9  | Q99PG2    | OGFR   | Opioid growth factor receptor                                        | 0               | 15            | 0             | 12  | 0 | 17 | 0 | 44  | N/A              | 5.419E-04 | 70.6     | ✓             |                                               | ✓      |        |                                             | (9)(23)                                  |                     |      |
| 10 | Q00519    | XDH    | Xanthine dehydrogenase/oxidase                                       | 0               | 17            | 0             | 16  | 0 | 11 | 0 | 44  | N/A              | 1.387E-03 | 147      |               |                                               | ✓      | ✓      |                                             | (26)                                     |                     |      |
| 11 | B1AU75    | B1AU75 | Nuclear autoantigenic sperm protein                                  | 0               | 17            | 0             | 14  | 0 | 13 | 0 | 44  | N/A              | 2.588E-04 | 84.0     | ✓             |                                               | ✓      |        |                                             | (26)                                     |                     |      |
| 12 | A2A6U3    | A2A6U3 | Septin 9                                                             | 0               | 18            | 0             | 16  | 0 | 10 | 0 | 44  | N/A              | 3.650E-03 | 63.7     | ✓             |                                               | ✓      |        |                                             | (26)                                     |                     |      |
| 13 | Q9DCL9    | PUR6   | Multifunctional protein ADE2                                         | 0               | 16            | 0             | 17  | 0 | 10 | 0 | 43  | N/A              | 2.797E-03 | 47.0     | ✓             |                                               | ✓      |        |                                             | (18)(19)(23)(26)                         |                     |      |
| 14 | Q8VCQ8    | Q8VCQ8 | Caldesmon 1                                                          | 0               | 15            | 0             | 12  | 0 | 15 | 0 | 42  | N/A              | 1.510E-04 | 60.4     | ✓             |                                               | ✓      | ✓      |                                             | (26)                                     |                     |      |
| 15 | Q9ERG0    | LIMA1  | LIM domain and actin-binding protein 1                               | 0               | 16            | 0             | 13  | 0 | 12 | 0 | 41  | N/A              | 3.411E-04 | 84.0     | ✓             |                                               | ✓      |        |                                             | (9)(23)(26)                              |                     |      |
| 16 | Q8BTI8-3  | SRRM2  | Isoform 3 of Serine/arginine repetitive matrix protein 2             | 0               | 15            | 0             | 13  | 0 | 13 | 0 | 41  | N/A              | 3.344E-05 | 285      | ✓             |                                               | ✓      |        |                                             | (9)(23)                                  |                     |      |
| 17 | Q3UMF0-4  | COBL1  | Isoform 4 of Cordon-bleu protein-like 1                              | 0               | 14            | 0             | 12  | 0 | 11 | 0 | 37  | N/A              | 1.517E-04 | 130      | ✓             |                                               | ✓      | ✓      |                                             |                                          |                     |      |
| 18 | O35286    | DHX15  | Putative pre-mRNA-splicing factor ATP-dependent RNA helicase         | 0               | 11            | 0             | 12  | 0 | 13 | 0 | 36  | N/A              | 3.166E-05 | 90.9     | ✓             |                                               |        |        |                                             |                                          | (9)(14)(23)(26)     |      |
| 19 | Q99K48    | NONO   | Non-POU domain-containing octamer-binding protein                    | 0               | 11            | 0             | 13  | 0 | 11 | 0 | 35  | N/A              | 6.260E-05 | 54.5     | ✓             |                                               | ✓      | ✓      |                                             |                                          | (9)(19)(23)(24)(26) |      |
| 20 | Q60865    | CAPR1  | Caprin-1                                                             | 0               | 12            | 0             | 15  | 0 | 8  | 0 | 35  | N/A              | 4.524E-03 | 78.1     | ✓             |                                               | ✓      | ✓      |                                             |                                          | (19)(23)(26)        |      |
| 21 | P51125-3  | ICAL   | Isoform 3 of Calpastatin                                             | 0               | 10            | 0             | 14  | 0 | 10 | 0 | 34  | N/A              | 1.051E-03 | 79.6     | ✓             |                                               | ✓      |        |                                             | (26)                                     |                     |      |
| 22 | Q3UMF0-3  | COBL1  | Isoform 3 of Cordon-bleu protein-like 1                              | 0               | 13            | 0             | 11  | 0 | 10 | 0 | 34  | N/A              | 2.114E-04 | 129      | ✓             |                                               | ✓      | ✓      |                                             |                                          |                     |      |
| 23 | Q7TQH0-2  | ATX2L  | Isoform 2 of Ataxin-2-like protein                                   | 0               | 7             | 0             | 15  | 0 | 11 | 0 | 33  | N/A              | 8.885E-03 | 113      | ✓             |                                               | ✓      | ✓      |                                             |                                          | (19)(23)            |      |
| 24 | Q8BK67    | RCC2   | Protein RCC2 GN=Rcc2                                                 | 0               | 7             | 0             | 11  | 0 | 14 | 0 | 32  | N/A              | 6.251E-03 | 55.9     | ✓             |                                               | ✓      |        |                                             |                                          | (9)(23)             |      |
| 25 | Q9Z1F9    | SAE2   | SUMO-activating enzyme subunit 2                                     | 0               | 11            | 0             | 11  | 0 | 10 | 0 | 32  | N/A              | 5.685E-06 | 70.5     | ✓             |                                               | ✓      | ✓      |                                             |                                          | (26)                |      |
| 26 | Q8C7R4    | UBA6   | Ubiquitin-like modifier-activating enzyme 6                          | 0               | 11            | 0             | 13  | 0 | 7  | 0 | 31  | N/A              | 4.237E-03 | 118      | ✓             |                                               | ✓      |        |                                             |                                          | (9)(23)             |      |
| 27 | Q62418-3  | DBNL   | Isoform 3 of Drebrin-like protein                                    | 0               | 8             | 0             | 8   | 0 | 14 | 0 | 30  | N/A              | 7.490E-03 | 48.3     | ✓             |                                               | ✓      | ✓      |                                             |                                          | (9)(23)(26)         |      |
| 28 | Q8K298    | ANLN   | Actin-binding protein anillin                                        | 0               | 10            | 0             | 9   | 0 | 10 | 0 | 29  | N/A              | 8.416E-06 | 123      | ✓             |                                               | ✓      |        |                                             |                                          | (9)(23)(26)         |      |
| 29 | Q80YR5    | SAFB2  | Scaffold attachment factor B2                                        | 0               | 8             | 0             | 8   | 0 | 13 | 0 | 29  | N/A              | 4.395E-03 | 112      | ✓             |                                               | ✓      |        |                                             |                                          | (9)(23)             |      |
| 30 | Q8R5H1-5  | UBP15  | Isoform 5 of Ubiquitin carboxyl-terminal hydrolase 15                | 0               | 11            | 0             | 10  | 0 | 8  | 0 | 29  | N/A              | 3.936E-04 | 109      | ✓             |                                               |        |        |                                             |                                          | (23)                |      |
| 31 | Q60710    | SAMH1  | SAM domain and HD domain-containing protein 1                        | 0               | 6             | 0             | 8   | 0 | 15 | 0 | 29  | N/A              | 2.395E-02 | 72.6     | ✓             |                                               | ✓      | ✓      |                                             |                                          | (23)                |      |
| 32 | Q9JLV1    | BAG3   | BAG family molecular chaperone regulator 3                           | 0               | 9             | 0             | 9   | 0 | 10 | 0 | 28  | N/A              | 9.679E-06 | 61.8     | ✓             |                                               | ✓      | ✓      |                                             |                                          | (9)(23)(26)         | (17) |

|    |           |        |                                                                                |   |    |   |    |   |    |   |    |     |           | 6AzGlcNAc        |          |          |                           |                                               |      |        |        |                                             |                                          |   |        |   |        |  |  |  |  |
|----|-----------|--------|--------------------------------------------------------------------------------|---|----|---|----|---|----|---|----|-----|-----------|------------------|----------|----------|---------------------------|-----------------------------------------------|------|--------|--------|---------------------------------------------|------------------------------------------|---|--------|---|--------|--|--|--|--|
|    |           |        |                                                                                |   |    |   |    |   |    |   |    |     |           | Spectral Counts  |          |          |                           |                                               |      |        |        |                                             |                                          |   |        |   |        |  |  |  |  |
|    |           |        |                                                                                |   |    |   |    |   |    |   |    |     |           | Ex-              | Ex-      | Ex-      | Sum                       |                                               |      |        |        |                                             |                                          |   |        |   |        |  |  |  |  |
|    |           |        |                                                                                |   |    |   |    |   |    |   |    |     |           | periment         | periment | periment |                           |                                               |      |        |        |                                             |                                          |   |        |   |        |  |  |  |  |
|    |           |        |                                                                                |   |    |   |    |   |    |   |    |     |           | 1                | 2        | 3        |                           |                                               |      |        |        |                                             |                                          |   |        |   |        |  |  |  |  |
|    |           |        |                                                                                |   |    |   |    |   |    |   |    |     |           | Localization     |          |          |                           |                                               |      |        |        |                                             |                                          |   |        |   |        |  |  |  |  |
| No | Accession | Gene   | Description                                                                    | - | +  | - | +  | - | +  | - | +  | -   | +         | Enrichment Ratio | t-test   | MW [kDa] | Exclusively Intracellular | Exclusively Extracellular, Lysosomal, Luminal | Both | GlcNAz | GalNAz | Previous O-GlcNAc Proteomics Identification | Previous Mucin Proteomics Identification |   |        |   |        |  |  |  |  |
|    |           |        |                                                                                |   |    |   |    |   |    |   |    |     |           |                  |          |          |                           |                                               |      |        |        |                                             |                                          | z | GalNAz | z | GalNAz |  |  |  |  |
| 33 | Q91W50    | CSDE1  | Cold shock domain-containing protein E1                                        | 0 | 9  | 0 | 10 | 0 | 9  | 0 | 28 | N/A | 9.679E-06 | 88.7             | ✓        |          |                           |                                               |      | ✓      |        | (9)(19)(23)                                 |                                          |   |        |   |        |  |  |  |  |
| 34 | Q61191    | HCFC1  | Host cell factor 1                                                             | 0 | 13 | 0 | 11 | 0 | 4  | 0 | 28 | N/A | 2.676E-02 | 210              | ✓        |          |                           |                                               |      | ✓      | ✓      | (1)(2)(9)(13)(19)(20)(21)(22)(23)(24)(26)   |                                          |   |        |   |        |  |  |  |  |
| 35 | Q3TW96    | UAP1L  | UDP-N-acetylhexosamine pyrophosphorylase-like protein 1                        | 0 | 11 | 0 | 11 | 0 | 6  | 0 | 28 | N/A | 4.992E-03 | 56.6             | ✓        |          |                           |                                               |      | ✓      | ✓      |                                             |                                          |   |        |   |        |  |  |  |  |
| 36 | O09106    | HDAC1  | Histone deacetylase 1                                                          | 0 | 11 | 0 | 10 | 0 | 6  | 0 | 27 | N/A | 4.150E-03 | 55.0             | ✓        |          |                           |                                               |      | ✓      |        | (9)(19)(23)                                 |                                          |   |        |   |        |  |  |  |  |
| 37 | Q9QXS6-3  | DREB   | Isoform E2 of Drebrin                                                          | 0 | 9  | 0 | 8  | 0 | 10 | 0 | 27 | N/A | 9.888E-05 | 72.4             | ✓        |          |                           |                                               |      | ✓      | ✓      | (23)                                        |                                          |   |        |   |        |  |  |  |  |
| 38 | Q3U4W8    | Q3U4W8 | Ubiquitin carboxyl-terminal hydrolase                                          | 0 | 8  | 0 | 9  | 0 | 10 | 0 | 27 | N/A | 9.888E-05 | 93.3             | ✓        |          |                           |                                               |      |        | ✓      |                                             |                                          |   |        |   |        |  |  |  |  |
| 39 | G5E8E1    | G5E8E1 | Leucine rich repeat (In FLII) interacting protein 1, isoform CRA_e             | 0 | 8  | 0 | 10 | 0 | 9  | 0 | 27 | N/A | 9.888E-05 | 48.9             | ✓        |          |                           |                                               |      | ✓      | ✓      |                                             |                                          |   |        |   |        |  |  |  |  |
| 40 | Q7TQI3    | OTUB1  | Ubiquitin thioesterase OTUB1                                                   | 0 | 9  | 0 | 10 | 0 | 6  | 0 | 25 | N/A | 2.272E-03 | 31.3             | ✓        |          |                           |                                               |      | ✓      |        | (5)(9)(23)(26)                              |                                          |   |        |   |        |  |  |  |  |
| 41 | O70318    | E41L2  | Band 4.1-like protein 2                                                        | 0 | 12 | 0 | 9  | 0 | 4  | 0 | 25 | N/A | 2.335E-02 | 110              | ✓        |          |                           |                                               |      | ✓      | ✓      | (20)(23)                                    |                                          |   |        |   |        |  |  |  |  |
| 42 | Q9CT10    | RANB3  | Ran-binding protein 3                                                          | 0 | 9  | 0 | 9  | 0 | 7  | 0 | 25 | N/A | 2.356E-04 | 52.5             | ✓        |          |                           |                                               |      | ✓      |        |                                             |                                          |   |        |   |        |  |  |  |  |
| 43 | Q05CL8    | LARP7  | La-related protein 7                                                           | 0 | 8  | 0 | 9  | 0 | 7  | 0 | 24 | N/A | 1.573E-04 | 64.8             | ✓        |          |                           |                                               |      | ✓      |        | (9)(23)                                     |                                          |   |        |   |        |  |  |  |  |
| 44 | Q8R050-2  | ERF3A  | Isoform 2 of Eukaryotic peptide chain release factor GTP-binding subunit ERF3A | 0 | 9  | 0 | 8  | 0 | 7  | 0 | 24 | N/A | 1.573E-04 | 68.5             | ✓        |          |                           |                                               |      | ✓      |        | (23)(26)                                    |                                          |   |        |   |        |  |  |  |  |
| 45 | P31230    | AIMP1  | Aminoacyl tRNA synthase complex-interacting multifunctional protein 1          | 0 | 8  | 0 | 8  | 0 | 8  | 0 | 24 | N/A | 0.000E+00 | 34.0             |          |          |                           |                                               | ✓    | ✓      | ✓      | (1)                                         |                                          |   |        |   |        |  |  |  |  |
| 46 | Q9CPV4-3  | GLOD4  | Isoform 3 of Glyoxalase domain-containing protein 4                            | 0 | 7  | 0 | 10 | 0 | 6  | 0 | 23 | N/A | 3.098E-03 | 30.8             | ✓        |          |                           |                                               |      | ✓      |        | (9)(23)(26)                                 |                                          |   |        |   |        |  |  |  |  |
| 47 | Q9CZD3    | SYG    | Glycine--tRNA ligase                                                           | 0 | 6  | 0 | 6  | 0 | 11 | 0 | 23 | N/A | 1.003E-02 | 81.8             | ✓        |          |                           |                                               |      | ✓      | ✓      | (14)(23)(26)                                |                                          |   |        |   |        |  |  |  |  |
| 48 | P51859    | HDGF   | Hepatoma-derived growth factor                                                 | 0 | 7  | 0 | 8  | 0 | 7  | 0 | 22 | N/A | 2.526E-05 | 26.3             | ✓        |          |                           |                                               |      | ✓      | ✓      | (9)(23)(26)                                 |                                          |   |        |   |        |  |  |  |  |
| 49 | G3X9V0    | G3X9V0 | MCG22048, isoform CRA_a                                                        | 0 | 6  | 0 | 8  | 0 | 8  | 0 | 22 | N/A | 3.882E-04 | 26.1             | ✓        |          |                           |                                               |      | ✓      |        |                                             |                                          |   |        |   |        |  |  |  |  |
| 50 | O70310    | NMT1   | Glycylpeptide N-tetradecanoyltransferase 1                                     | 0 | 6  | 0 | 5  | 0 | 10 | 0 | 21 | N/A | 1.016E-02 | 56.9             | ✓        |          |                           |                                               |      | ✓      |        | (9)(23)                                     | (17)                                     |   |        |   |        |  |  |  |  |
| 51 | Q6PAM1    | TXLNA  | Alpha-taxilin                                                                  | 0 | 6  | 0 | 8  | 0 | 7  | 0 | 21 | N/A | 2.655E-04 | 62.3             | ✓        |          |                           |                                               |      |        |        | (9)(23)(26)                                 |                                          |   |        |   |        |  |  |  |  |
| 52 | Q8WTY4    | CPIN1  | Anamorsin                                                                      | 0 | 10 | 0 | 4  | 0 | 7  | 0 | 21 | N/A | 1.559E-02 | 33.4             | ✓        |          |                           |                                               |      |        |        | (26)                                        |                                          |   |        |   |        |  |  |  |  |
| 53 | P46664    | PURA2  | Adenylosuccinate synthetase isozyme 2                                          | 0 | 6  | 0 | 9  | 0 | 6  | 0 | 21 | N/A | 2.192E-03 | 50.0             | ✓        |          |                           |                                               |      |        |        | (23)                                        |                                          |   |        |   |        |  |  |  |  |
| 54 | O54988-2  | SLK    | Isoform 2 of STE20-like serine/threonine-protein kinase                        | 0 | 10 | 0 | 7  | 0 | 4  | 0 | 21 | N/A | 1.559E-02 | 138              | ✓        |          |                           |                                               |      |        |        | (14)(26)                                    |                                          |   |        |   |        |  |  |  |  |
| 55 | Q9DBG5    | PLIN3  | Perilipin-3                                                                    | 0 | 8  | 0 | 6  | 0 | 7  | 0 | 21 | N/A | 2.655E-04 | 47.2             | ✓        |          |                           |                                               |      | ✓      | ✓      | (1)(9)(20)(23)                              |                                          |   |        |   |        |  |  |  |  |
| 56 | Q64012-2  | RALY   | Isoform 1 of RNA-binding protein Raly                                          | 0 | 7  | 0 | 7  | 0 | 7  | 0 | 21 | N/A | 0.000E+00 | 31.2             | ✓        |          |                           |                                               |      | ✓      |        |                                             |                                          |   |        |   |        |  |  |  |  |
| 57 | J3QNB1    | J3QNB1 | La-related protein 1                                                           | 0 | 6  | 0 | 7  | 0 | 8  | 0 | 21 | N/A | 2.655E-04 | 121              | ✓        |          |                           |                                               |      | ✓      |        |                                             |                                          |   |        |   |        |  |  |  |  |
| 58 | Q8JZK9    | HMCS1  | Hydroxymethylglutaryl-CoA synthase, cytoplasmic                                | 0 | 7  | 0 | 7  | 0 | 6  | 0 | 20 | N/A | 3.688E-05 | 57.5             | ✓        |          |                           |                                               |      |        |        | (5)                                         |                                          |   |        |   |        |  |  |  |  |
| 59 | P70372    | ELAV1  | ELAV-like protein 1                                                            | 0 | 6  | 0 | 8  | 0 | 6  | 0 | 20 | N/A | 5.620E-04 | 36.1             | ✓        |          |                           |                                               |      |        |        | (19)(26)                                    |                                          |   |        |   |        |  |  |  |  |
| 60 | Q8R1X6    | SPG20  | Spartin                                                                        | 0 | 9  | 0 | 8  | 0 | 3  | 0 | 20 | N/A | 2.292E-02 | 72.6             | ✓        |          |                           |                                               |      | ✓      |        | (1)(20)                                     |                                          |   |        |   |        |  |  |  |  |
| 61 | Q9Z0E6    | GBP2   | Interferon-induced guanylate-binding protein 2                                 | 0 | 8  | 0 | 8  | 0 | 4  | 0 | 20 | N/A | 7.490E-03 | 66.7             | ✓        |          |                           |                                               |      | ✓      |        |                                             |                                          |   |        |   |        |  |  |  |  |
| 62 | Q9WTK5    | NFKB2  | Nuclear factor NF-kappa-B p100 subunit                                         | 0 | 6  | 0 | 7  | 0 | 6  | 0 | 19 | N/A | 4.520E-05 | 96.8             | ✓        |          |                           |                                               |      | ✓      | ✓      | (9)(23)(26)                                 |                                          |   |        |   |        |  |  |  |  |
| 63 | A2AMW0    | A2AMW0 | Capping protein (Actin filament) muscle Z-line, beta                           | 0 | 7  | 0 | 8  | 0 | 4  | 0 | 19 | N/A | 6.214E-03 | 29.3             | ✓        |          |                           |                                               |      | ✓      |        | (5)(26)                                     |                                          |   |        |   |        |  |  |  |  |
| 64 | P45377    | ALD2   | Aldose reductase-related protein 2                                             | 0 | 8  | 0 | 6  | 0 | 5  | 0 | 19 | N/A | 1.991E-03 | 36.1             | ✓        |          |                           |                                               |      | ✓      | ✓      | (26)                                        |                                          |   |        |   |        |  |  |  |  |
| 65 | Q60967    | PAPS1  | Bifunctional 3'-phosphoadenosine 5'-phosphosulfate synthase 1                  | 0 | 7  | 0 | 6  | 0 | 6  | 0 | 19 | N/A | 4.520E-05 | 70.7             | ✓        |          |                           |                                               |      | ✓      |        |                                             |                                          |   |        |   |        |  |  |  |  |
| 66 | D3YXK2    | SAFB1  | Scaffold attachment factor B1                                                  | 0 | 6  | 0 | 6  | 0 | 7  | 0 | 19 | N/A | 4.520E-05 | 105              | ✓        |          |                           |                                               |      | ✓      | ✓      |                                             |                                          |   |        |   |        |  |  |  |  |
| 67 | Q8C052    | MAP1S  | Microtubule-associated protein 1S                                              | 0 | 6  | 0 | 6  | 0 | 6  | 0 | 18 | N/A | 0.000E+00 | 103              | ✓        |          |                           |                                               |      | ✓      |        | (9)(23)(26)                                 |                                          |   |        |   |        |  |  |  |  |
| 68 | Q9Z1D1    | EIF3G  | Eukaryotic translation initiation factor 3 subunit G                           | 0 | 6  | 0 | 7  | 0 | 5  | 0 | 18 | N/A | 4.841E-04 | 35.6             | ✓        |          |                           |                                               |      | ✓      | ✓      | (9)(19)(23)(26)                             |                                          |   |        |   |        |  |  |  |  |
| 69 | Q8C156    | CND2   | Condensin complex subunit 2                                                    | 0 | 6  | 0 | 6  | 0 | 6  | 0 | 18 | N/A | 0.000E+00 | 82.3             | ✓        |          |                           |                                               |      | ✓      |        | (23)                                        |                                          |   |        |   |        |  |  |  |  |
| 70 | P35235    | PTN11  | Tyrosine-protein phosphatase non-receptor type 11                              | 0 | 6  | 0 | 5  | 0 | 7  | 0 | 18 | N/A | 4.841E-04 | 68.4             | ✓        |          |                           |                                               |      | ✓      |        | (14)(23)                                    |                                          |   |        |   |        |  |  |  |  |
| 71 | Q8BVY0    | Q8BVY0 | Protein Rsl1d1                                                                 | 0 | 6  | 0 | 6  | 0 | 6  | 0 | 18 | N/A | 0.000E+00 | 50.4             | ✓        |          |                           |                                               |      | ✓      |        |                                             |                                          |   |        |   |        |  |  |  |  |
| 72 | Q6PHZ2-2  | KCC2D  | Isoform 2 of Calcium/calmodulin-dependent protein kinase type II subunit delta | 0 | 7  | 0 | 6  | 0 | 5  | 0 | 18 | N/A | 4.841E-04 | 54.1             | ✓        |          |                           |                                               |      | ✓      |        |                                             |                                          |   |        |   |        |  |  |  |  |
| 73 | E9Q066    | E9Q066 | La-related protein 4                                                           | 0 | 7  | 0 | 5  | 0 | 6  | 0 | 18 | N/A | 4.841E-04 | 79.6             | ✓        |          |                           |                                               |      | ✓      |        |                                             |                                          |   |        |   |        |  |  |  |  |

|     |           | 6AzGlcNAc     |                                                            |               |   |               |   |     |   |                  |    | Spectral Counts |           |          |   |                           |   |                                               |   |        |   | Localization |   |                                             |   |                                          |             |      |  |  |  |
|-----|-----------|---------------|------------------------------------------------------------|---------------|---|---------------|---|-----|---|------------------|----|-----------------|-----------|----------|---|---------------------------|---|-----------------------------------------------|---|--------|---|--------------|---|---------------------------------------------|---|------------------------------------------|-------------|------|--|--|--|
|     |           | Ex-periment 1 |                                                            | Ex-periment 2 |   | Ex-periment 3 |   | Sum |   | Enrichment Ratio |    | t-test          |           | MW [kDa] |   | Exclusively Intracellular |   | Exclusively Extracellular, Lysosomal, Luminal |   | GlcNAz |   | GalNAz       |   | Previous O-GlcNAc Proteomics Identification |   | Previous Mucin Proteomics Identification |             |      |  |  |  |
| No  | Accession | Gene          | Description                                                | -             | + | -             | + | -   | + | -                | +  | -               | +         | -        | + | -                         | + | -                                             | + | -      | + | -            | + | -                                           | + | -                                        | +           |      |  |  |  |
| 74  | Q8BMK4    | CKAP4         | Cytoskeleton-associated protein 4                          | 0             | 6 | 0             | 6 | 0   | 5 | 0                | 17 | N/A             | 7.021E-05 | 63.7     |   |                           |   |                                               |   | ✓      |   |              |   |                                             |   |                                          | (16)        |      |  |  |  |
| 75  | Q08093    | CNN2          | Calponin-2                                                 | 0             | 7 | 0             | 6 | 0   | 4 | 0                | 17 | N/A             | 3.016E-03 | 33.1     | ✓ |                           |   |                                               |   | ✓      | ✓ |              |   |                                             |   |                                          | (9)(23)(26) |      |  |  |  |
| 76  | Q91Z38    | TTC1          | Tetratricopeptide repeat protein 1                         | 0             | 6 | 0             | 6 | 0   | 5 | 0                | 17 | N/A             | 7.021E-05 | 33.2     | ✓ |                           |   |                                               |   | ✓      |   |              |   |                                             |   |                                          | (9)(23)     |      |  |  |  |
| 77  | O70551    | SRPK1         | SRSF protein kinase 1                                      | 0             | 3 | 0             | 6 | 0   | 8 | 0                | 17 | N/A             | 1.754E-02 | 73.0     | ✓ |                           |   |                                               |   | ✓      |   |              |   |                                             |   |                                          | (9)(23)     |      |  |  |  |
| 78  | Q9DAW9    | CNN3          | Calponin-3 GN=Cnn3 PE=2 SV=1 - [CNN3_MOUSE]                | 0             | 5 | 0             | 4 | 0   | 8 | 0                | 17 | N/A             | 9.206E-03 | 36.4     | ✓ |                           |   |                                               |   |        |   |              |   |                                             |   |                                          | (9)         |      |  |  |  |
| 79  | P24288    | BCAT1         | Branched-chain-amino-acid aminotransferase, cytosolic      | 0             | 5 | 0             | 6 | 0   | 5 | 0                | 16 | N/A             | 8.922E-05 | 42.8     | ✓ |                           |   |                                               |   |        |   |              |   |                                             |   |                                          | (9)(23)(26) |      |  |  |  |
| 80  | Q6ZPJ3    | UBE2O         | Ubiquitin-conjugating enzyme E2 O                          | 0             | 5 | 0             | 5 | 0   | 6 | 0                | 16 | N/A             | 8.922E-05 | 141      | ✓ |                           |   |                                               |   |        |   |              |   |                                             |   |                                          | (9)(23)     |      |  |  |  |
| 81  | Q9Z110-2  | P5CS          | Isoform Short of Delta-1-pyrroline-5-carboxylate synthase  | 0             | 7 | 0             | 5 | 0   | 4 | 0                | 16 | N/A             | 3.772E-03 | 87.0     | ✓ |                           |   |                                               |   | ✓      |   |              |   |                                             |   |                                          | (23)(26)    |      |  |  |  |
| 82  | P32921-2  | SYWC          | Isoform 2 of Tryptophan--tRNA ligase, cytoplasmic          | 0             | 6 | 0             | 3 | 0   | 7 | 0                | 16 | N/A             | 1.135E-02 | 53.6     | ✓ |                           |   |                                               |   | ✓      |   |              |   |                                             |   |                                          | (14)(23)    |      |  |  |  |
| 83  | Q8K354    | CYTB          | Carbonyl reductase [NADPH] 3                               | 0             | 4 | 0             | 6 | 0   | 6 | 0                | 16 | N/A             | 1.324E-03 | 30.9     | ✓ |                           |   |                                               |   | ✓      |   |              |   |                                             |   |                                          |             |      |  |  |  |
| 84  | Q6NZD2    | Q6NZD2        | Sorting nexin 1                                            | 0             | 7 | 0             | 5 | 0   | 4 | 0                | 16 | N/A             | 3.772E-03 | 58.8     | ✓ |                           |   |                                               |   | ✓      | ✓ |              |   |                                             |   |                                          |             |      |  |  |  |
| 85  | G3UZ12    | G3UZ12        | Heterogeneous nuclear ribonucleoprotein Q                  | 0             | 5 | 0             | 6 | 0   | 5 | 0                | 16 | N/A             | 8.922E-05 | 58.7     | ✓ |                           |   |                                               |   |        |   |              |   |                                             |   |                                          |             |      |  |  |  |
| 86  | P23198    | CBX3          | Chromobox protein homolog 3                                | 0             | 5 | 0             | 5 | 0   | 5 | 0                | 15 | N/A             | 0.000E+00 | 20.8     | ✓ |                           |   |                                               |   | ✓      |   |              |   |                                             |   |                                          | (9)(23)(26) |      |  |  |  |
| 87  | P97452    | BOP1          | Ribosome biogenesis protein BOP1                           | 0             | 6 | 0             | 5 | 0   | 4 | 0                | 15 | N/A             | 9.781E-04 | 82.5     | ✓ |                           |   |                                               |   |        |   |              |   |                                             |   |                                          | (9)(23)     |      |  |  |  |
| 88  | Q9JLM8    | DCLK1         | Serine/threonine-protein kinase DCLK1                      | 0             | 4 | 0             | 6 | 0   | 5 | 0                | 15 | N/A             | 9.781E-04 | 84.1     | ✓ |                           |   |                                               |   | ✓      |   |              |   |                                             |   |                                          | (5)(20)     |      |  |  |  |
| 89  | Q9D819    | IPYR          | Inorganic pyrophosphatase                                  | 0             | 6 | 0             | 4 | 0   | 5 | 0                | 15 | N/A             | 9.781E-04 | 32.6     | ✓ |                           |   |                                               |   |        |   |              |   |                                             |   |                                          | (23)(26)    |      |  |  |  |
| 90  | Q64737    | PUR2          | Trifunctional purine biosynthetic protein adenosine-3      | 0             | 6 | 0             | 5 | 0   | 4 | 0                | 15 | N/A             | 9.781E-04 | 107      | ✓ |                           |   |                                               |   |        |   |              |   |                                             |   |                                          | (23)(26)    |      |  |  |  |
| 91  | O09172    | GSH0          | Glutamate--cysteine ligase regulatory subunit              | 0             | 5 | 0             | 6 | 0   | 4 | 0                | 15 | N/A             | 9.781E-04 | 30.5     | ✓ |                           |   |                                               |   | ✓      |   |              |   |                                             |   |                                          | (23)(26)    |      |  |  |  |
| 92  | P61759    | PFD3          | Prefoldin subunit 3                                        | 0             | 4 | 0             | 6 | 0   | 5 | 0                | 15 | N/A             | 9.781E-04 | 22.4     | ✓ |                           |   |                                               |   |        |   |              |   |                                             |   |                                          |             |      |  |  |  |
| 93  | E9PZM7    | E9PZM7        | Protein Scaf11                                             | 0             | 7 | 0             | 3 | 0   | 5 | 0                | 15 | N/A             | 1.235E-02 | 162      | ✓ |                           |   |                                               |   |        |   |              |   |                                             |   |                                          |             |      |  |  |  |
| 94  | P42567    | EPS15         | Epidermal growth factor receptor substrate 15              | 0             | 3 | 0             | 6 | 0   | 5 | 0                | 14 | N/A             | 6.122E-03 | 98.4     | ✓ |                           |   |                                               |   |        |   |              |   |                                             |   |                                          | (9)(23)     |      |  |  |  |
| 95  | B2RRE7    | OTUD4         | OTU domain-containing protein 4                            | 0             | 4 | 0             | 6 | 0   | 4 | 0                | 14 | N/A             | 2.192E-03 | 123      | ✓ |                           |   |                                               |   |        |   | ✓            |   |                                             |   |                                          | (9)(23)     |      |  |  |  |
| 96  | Q8R2M2    | TDIF2         | Deoxynucleotidyltransferase terminal-interacting protein 2 | 0             | 5 | 0             | 5 | 0   | 4 | 0                | 14 | N/A             | 1.510E-04 | 84.2     | ✓ |                           |   |                                               |   | ✓      |   |              |   |                                             |   |                                          | (23)        |      |  |  |  |
| 97  | Q9WU78    | PDC6I         | Programmed cell death 6-interacting protein                | 0             | 5 | 0             | 5 | 0   | 4 | 0                | 14 | N/A             | 1.510E-04 | 96.0     | ✓ |                           |   |                                               |   | ✓      | ✓ |              |   |                                             |   |                                          |             |      |  |  |  |
| 98  | Q62426    | CYTB          | Cystatin-B                                                 | 0             | 4 | 0             | 6 | 0   | 4 | 0                | 14 | N/A             | 2.192E-03 | 11.0     | ✓ |                           |   |                                               |   | ✓      |   |              |   |                                             |   |                                          |             |      |  |  |  |
| 99  | P98078    | DAB2          | Disabled homolog 2                                         | 0             | 4 | 0             | 7 | 0   | 3 | 0                | 14 | N/A             | 1.780E-02 | 82.3     | ✓ |                           |   |                                               |   | ✓      | ✓ |              |   |                                             |   |                                          |             |      |  |  |  |
| 100 | F6T2Z7    | F6T2Z7        | Protein Cald1 (Fragment)                                   | 0             | 5 | 0             | 3 | 0   | 6 | 0                | 14 | N/A             | 6.122E-03 | 41.4     | ✓ |                           |   |                                               |   | ✓      | ✓ |              |   |                                             |   |                                          |             |      |  |  |  |
| 101 | Q8K310    | MATR3         | Matrin-3                                                   | 0             | 3 | 0             | 5 | 0   | 5 | 0                | 13 | N/A             | 2.890E-03 | 94.6     | ✓ |                           |   |                                               |   |        |   |              |   |                                             |   |                                          | (9)(23)(26) |      |  |  |  |
| 102 | Q8CI11    | GNL3          | Guanine nucleotide-binding protein-like 3                  | 0             | 4 | 0             | 4 | 0   | 5 | 0                | 13 | N/A             | 2.020E-04 | 60.7     | ✓ |                           |   |                                               |   |        |   |              |   |                                             |   |                                          | (9)(23)(26) |      |  |  |  |
| 103 | P70288    | HDAC2         | Histone deacetylase 2                                      | 0             | 5 | 0             | 4 | 0   | 4 | 0                | 13 | N/A             | 2.020E-04 | 55.3     | ✓ |                           |   |                                               |   | ✓      |   |              |   |                                             |   |                                          | (9)(23)     |      |  |  |  |
| 104 | P37913    | DNL1          | DNA ligase 1                                               | 0             | 6 | 0             | 3 | 0   | 4 | 0                | 13 | N/A             | 7.966E-03 | 102      | ✓ |                           |   |                                               |   |        |   |              |   |                                             |   |                                          | (26)        |      |  |  |  |
| 105 | P49586    | PCY1A         | Choline-phosphate cytidyltransferase A                     | 0             | 4 | 0             | 6 | 0   | 3 | 0                | 13 | N/A             | 7.966E-03 | 41.6     | ✓ |                           |   |                                               |   | ✓      |   |              |   |                                             |   |                                          | (23)        |      |  |  |  |
| 106 | Q6P5B5    | Q6P5B5        | Fragile X mental retardation syndrome-related protein 2    | 0             | 3 | 0             | 5 | 0   | 5 | 0                | 13 | N/A             | 2.890E-03 | 74.2     | ✓ |                           |   |                                               |   | ✓      |   |              |   |                                             |   |                                          |             |      |  |  |  |
| 107 | Q61081    | CDC37         | Hsp90 co-chaperone Cdc37                                   | 0             | 3 | 0             | 5 | 0   | 4 | 0                | 12 | N/A             | 2.278E-03 | 44.6     | ✓ |                           |   |                                               |   | ✓      |   |              |   |                                             |   |                                          | (9)(23)(26) |      |  |  |  |
| 108 | Q9QXD8    | LIMD1         | LIM domain-containing protein 1                            | 0             | 4 | 0             | 5 | 0   | 3 | 0                | 12 | N/A             | 2.278E-03 | 71.4     | ✓ |                           |   |                                               |   |        |   |              |   |                                             |   |                                          | (9)(23)     |      |  |  |  |
| 109 | Q8BK64    | AHSA1         | Activator of 90 kDa heat shock protein ATPase homolog 1    | 0             | 5 | 0             | 4 | 0   | 3 | 0                | 12 | N/A             | 2.278E-03 | 38.1     | ✓ |                           |   |                                               |   |        |   |              |   |                                             |   |                                          | (9)(23)     |      |  |  |  |
| 110 | Q5UE59    | Q5UE59        | Kinesin light chain 1                                      | 0             | 3 | 0             | 3 | 0   | 6 | 0                | 12 | N/A             | 1.613E-02 | 61.6     | ✓ |                           |   |                                               |   | ✓      |   |              |   |                                             |   |                                          |             |      |  |  |  |
| 111 | O89110    | CASP8         | Caspase-8                                                  | 0             | 5 | 0             | 4 | 0   | 3 | 0                | 12 | N/A             | 2.278E-03 | 55.3     | ✓ |                           |   |                                               |   | ✓      |   |              |   |                                             |   |                                          |             |      |  |  |  |
| 112 | O08529    | CAN2          | Calpain-2 catalytic subunit                                | 0             | 4 | 0             | 5 | 0   | 3 | 0                | 12 | N/A             | 2.278E-03 | 79.8     | ✓ |                           |   |                                               |   | ✓      |   |              |   |                                             |   |                                          |             |      |  |  |  |
| 113 | B7ZP47    | B7ZP47        | Wapal protein                                              | 0             | 3 | 0             | 3 | 0   | 6 | 0                | 12 | N/A             | 1.613E-02 | 133      | ✓ |                           |   |                                               |   | ✓      |   |              |   |                                             |   |                                          |             |      |  |  |  |
| 114 | Q9JKF1    | IQGA1         | Ras GTPase-activating-like protein IQGAP1                  | 0             | 4 | 0             | 4 | 0   | 3 | 0                | 11 | N/A             | 3.882E-04 | 189      | ✓ |                           |   |                                               |   |        |   |              |   |                                             |   |                                          | (14)(23)    | (17) |  |  |  |
| 115 | Q6PGH2    | HN1L          | Hematological and neurological expressed 1-like protein    | 0             | 3 | 0             | 4 | 0   | 4 | 0                | 11 | N/A             | 3.882E-04 | 20.0     | ✓ |                           |   |                                               |   | ✓      |   |              |   |                                             |   |                                          | (9)(23)(26) | (16) |  |  |  |

|     |           |        |                                                                         |   |   |   |   |   |   |   |    |     |           | 6AzGlcNAc                |                      |                      |                                   |                                                                 |      |            |             |                                                           |                                                        |   |   |   |   |   |   |   |   |
|-----|-----------|--------|-------------------------------------------------------------------------|---|---|---|---|---|---|---|----|-----|-----------|--------------------------|----------------------|----------------------|-----------------------------------|-----------------------------------------------------------------|------|------------|-------------|-----------------------------------------------------------|--------------------------------------------------------|---|---|---|---|---|---|---|---|
|     |           |        |                                                                         |   |   |   |   |   |   |   |    |     |           | Spectral Counts          |                      |                      |                                   |                                                                 |      |            |             |                                                           |                                                        |   |   |   |   |   |   |   |   |
|     |           |        |                                                                         |   |   |   |   |   |   |   |    |     |           | Ex-<br>peri-<br>ment     | Ex-<br>peri-<br>ment | Ex-<br>peri-<br>ment | Sum                               | Localization                                                    |      |            |             |                                                           |                                                        |   |   |   |   |   |   |   |   |
| No  | Accession | Gene   | Description                                                             | - | + | - | + | - | + | - | +  | -   | +         | Enrich-<br>ment<br>Ratio | t-test               | MW<br>[kDa]          | Exclusively<br>Intracellu-<br>lar | Exclusively<br>Extracellu-<br>lar, Lysoso-<br>mal, Lume-<br>nal | Both | GlcNA<br>z | Gal-<br>NAz | Previous O-<br>GlcNAc Pro-<br>teomics Identi-<br>fication | Previous<br>Mucin<br>Proteomics<br>Identifica-<br>tion |   |   |   |   |   |   |   |   |
|     |           |        |                                                                         |   |   |   |   |   |   |   |    |     |           |                          |                      |                      |                                   |                                                                 |      |            |             |                                                           |                                                        | 1 | 2 | 3 | 4 | 5 | 6 | 7 | 8 |
| 116 | Q810D6    | GRWD1  | Glutamate-rich WD repeat-containing protein 1                           | 0 | 4 | 0 | 4 | 0 | 3 | 0 | 11 | N/A | 3.882E-04 | 49.2                     | ✓                    |                      |                                   |                                                                 |      |            |             | (9)(23)                                                   |                                                        |   |   |   |   |   |   |   |   |
| 117 | P42227-2  | STAT3  | Isoform Stat3B of Signal transducer and activator of transcription 3    | 0 | 4 | 0 | 4 | 0 | 3 | 0 | 11 | N/A | 3.882E-04 | 83.1                     | ✓                    |                      |                                   |                                                                 |      |            | ✓           | (9)                                                       |                                                        |   |   |   |   |   |   |   |   |
| 118 | P19096    | FAS    | Fatty acid synthase                                                     | 0 | 2 | 0 | 5 | 0 | 4 | 0 | 11 | N/A | 1.417E-02 | 272                      | ✓                    |                      |                                   |                                                                 |      | ✓          |             | (5)(8)(23)                                                |                                                        |   |   |   |   |   |   |   |   |
| 119 | Q7TSJ2-3  | MAP6   | Isoform 3 of Microtubule-associated protein 6                           | 0 | 3 | 0 | 5 | 0 | 3 | 0 | 11 | N/A | 5.328E-03 | 32.8                     | ✓                    |                      |                                   |                                                                 |      | ✓          | ✓           | (5)                                                       |                                                        |   |   |   |   |   |   |   |   |
| 120 | Q9CXW3    | CYBP   | Calcyclin-binding protein                                               | 0 | 3 | 0 | 3 | 0 | 5 | 0 | 11 | N/A | 5.328E-03 | 26.5                     | ✓                    |                      |                                   |                                                                 |      | ✓          |             | (26)                                                      |                                                        |   |   |   |   |   |   |   |   |
| 121 | P52479    | UBP10  | Ubiquitin carboxyl-terminal hydrolase 10                                | 0 | 5 | 0 | 3 | 0 | 3 | 0 | 11 | N/A | 5.328E-03 | 87.0                     | ✓                    |                      |                                   |                                                                 |      |            |             | (23)(26)                                                  |                                                        |   |   |   |   |   |   |   |   |
| 122 | O08915    | AIP    | AH receptor-interacting protein                                         | 0 | 3 | 0 | 5 | 0 | 3 | 0 | 11 | N/A | 5.328E-03 | 37.6                     | ✓                    |                      |                                   |                                                                 |      |            |             | (20)                                                      |                                                        |   |   |   |   |   |   |   |   |
| 123 | Q9DBC7    | KAP0   | cAMP-dependent protein kinase type I-alpha regulatory subunit           | 0 | 4 | 0 | 4 | 0 | 3 | 0 | 11 | N/A | 3.882E-04 | 43.2                     | ✓                    |                      |                                   |                                                                 |      | ✓          |             |                                                           |                                                        |   |   |   |   |   |   |   |   |
| 124 | Q9D4G5    | Q9D4G5 | Protein Pop1                                                            | 0 | 4 | 0 | 4 | 0 | 3 | 0 | 11 | N/A | 3.882E-04 | 114                      | ✓                    |                      |                                   |                                                                 |      |            |             |                                                           |                                                        |   |   |   |   |   |   |   |   |
| 125 | Q8C650-2  | SEP10  | Isoform 2 of Septin-10                                                  | 0 | 3 | 0 | 4 | 0 | 4 | 0 | 11 | N/A | 3.882E-04 | 49.8                     | ✓                    |                      |                                   |                                                                 |      |            |             |                                                           |                                                        |   |   |   |   |   |   |   |   |
| 126 | Q5SSZ5-2  | TENS3  | Isoform 2 of Tensin-3                                                   | 0 | 4 | 0 | 4 | 0 | 3 | 0 | 11 | N/A | 3.882E-04 | 58.7                     | ✓                    |                      |                                   |                                                                 |      |            |             |                                                           |                                                        |   |   |   |   |   |   |   |   |
| 127 | O55131    | SEPT7  | Septin-7                                                                | 0 | 3 | 0 | 5 | 0 | 3 | 0 | 11 | N/A | 5.328E-03 | 50.5                     | ✓                    |                      |                                   |                                                                 |      |            |             |                                                           |                                                        |   |   |   |   |   |   |   |   |
| 128 | G3X8Y3    | G3X8Y3 | N-alpha-acetyltransferase 15, NatA auxiliary subunit                    | 0 | 4 | 0 | 4 | 0 | 3 | 0 | 11 | N/A | 3.882E-04 | 101                      | ✓                    |                      |                                   |                                                                 |      |            |             |                                                           |                                                        |   |   |   |   |   |   |   |   |
| 129 | E9Q2X6    | E9Q2X6 | Structural maintenance of chromosomes protein                           | 0 | 2 | 0 | 4 | 0 | 5 | 0 | 11 | N/A | 1.417E-02 | 144                      | ✓                    |                      |                                   |                                                                 |      |            |             |                                                           |                                                        |   |   |   |   |   |   |   |   |
| 130 | E9PX53    | E9PX53 | Serine/threonine-protein phosphatase 4 regulatory subunit 1             | 0 | 5 | 0 | 3 | 0 | 3 | 0 | 11 | N/A | 5.328E-03 | 104                      | ✓                    |                      |                                   |                                                                 |      |            |             |                                                           |                                                        |   |   |   |   |   |   |   |   |
| 131 | Q8C1A5    | THOP1  | Thimet oligopeptidase                                                   | 0 | 4 | 0 | 4 | 0 | 2 | 0 | 10 | N/A | 7.490E-03 | 78.0                     | ✓                    |                      |                                   |                                                                 |      |            |             | (9)(23)                                                   | (17)                                                   |   |   |   |   |   |   |   |   |
| 132 | P62774    | MTPN   | Myotrophin                                                              | 0 | 2 | 0 | 3 | 0 | 5 | 0 | 10 | N/A | 1.944E-02 | 12.9                     | ✓                    |                      |                                   |                                                                 |      | ✓          |             | (9)(23)                                                   |                                                        |   |   |   |   |   |   |   |   |
| 133 | Q9QYA2    | TOM40  | Mitochondrial import receptor subunit TOM40 homolog                     | 0 | 5 | 0 | 3 | 0 | 2 | 0 | 10 | N/A | 1.944E-02 | 37.9                     | ✓                    |                      |                                   |                                                                 |      |            |             | (23)                                                      |                                                        |   |   |   |   |   |   |   |   |
| 134 | Q9QWF0    | CAF1A  | Chromatin assembly factor 1 subunit A                                   | 0 | 4 | 0 | 3 | 0 | 3 | 0 | 10 | N/A | 5.620E-04 | 102                      | ✓                    |                      |                                   |                                                                 |      |            |             | (23)                                                      |                                                        |   |   |   |   |   |   |   |   |
| 135 | Q9CXF4    | TBC15  | TBC1 domain family member 15                                            | 0 | 2 | 0 | 4 | 0 | 4 | 0 | 10 | N/A | 7.490E-03 | 76.5                     | ✓                    |                      |                                   |                                                                 |      |            |             | (23)                                                      |                                                        |   |   |   |   |   |   |   |   |
| 136 | Q3UY34    | CL043  | Uncharacterized protein C12orf43 homolog                                | 0 | 4 | 0 | 3 | 0 | 3 | 0 | 10 | N/A | 5.620E-04 | 27.6                     | ✓                    |                      |                                   |                                                                 |      | ✓          |             | (23)                                                      |                                                        |   |   |   |   |   |   |   |   |
| 137 | P63037    | DNJA1  | DnaJ homolog subfamily A member 1                                       | 0 | 5 | 0 | 2 | 0 | 3 | 0 | 10 | N/A | 1.944E-02 | 44.8                     | ✓                    |                      |                                   |                                                                 |      | ✓          |             | (19)(26)                                                  |                                                        |   |   |   |   |   |   |   |   |
| 138 | Q9JLM9    | GRB14  | Growth factor receptor-bound protein 14                                 | 0 | 4 | 0 | 3 | 0 | 3 | 0 | 10 | N/A | 5.620E-04 | 60.5                     | ✓                    |                      |                                   |                                                                 |      |            |             |                                                           |                                                        |   |   |   |   |   |   |   |   |
| 139 | B1AXN9    | B1AXN9 | Ribosomal protein S6 kinase alpha-3                                     | 0 | 4 | 0 | 3 | 0 | 3 | 0 | 10 | N/A | 5.620E-04 | 80.6                     | ✓                    |                      |                                   |                                                                 |      |            |             |                                                           |                                                        |   |   |   |   |   |   |   |   |
| 140 | A2AMY5    | A2AMY5 | Ubiquitin-associated protein 2                                          | 0 | 4 | 0 | 3 | 0 | 3 | 0 | 10 | N/A | 5.620E-04 | 118                      | ✓                    |                      |                                   |                                                                 |      | ✓          | ✓           |                                                           |                                                        |   |   |   |   |   |   |   |   |
| 141 | Q9DBR1-2  | XRN2   | Isoform 2 of 5'-3' exoribonuclease 2                                    | 0 | 3 | 0 | 3 | 0 | 3 | 0 | 9  | N/A | 0.000E+00 | 108                      | ✓                    |                      |                                   |                                                                 |      | ✓          |             | (9)(23)                                                   |                                                        |   |   |   |   |   |   |   |   |
| 142 | Q9DBR0    | AKAP8  | A-kinase anchor protein 8                                               | 0 | 2 | 0 | 3 | 0 | 4 | 0 | 9  | N/A | 6.533E-03 | 76.2                     | ✓                    |                      |                                   |                                                                 |      |            | ✓           | (9)(23)                                                   |                                                        |   |   |   |   |   |   |   |   |
| 143 | Q91XI1    | DUS3L  | tRNA-dihydrouridine(47) synthase [NAD(P)(+)]-like                       | 0 | 3 | 0 | 3 | 0 | 3 | 0 | 9  | N/A | 0.000E+00 | 71.0                     | ✓                    |                      |                                   |                                                                 |      |            |             | (9)(23)                                                   |                                                        |   |   |   |   |   |   |   |   |
| 144 | Q9R0P5    | DEST   | Destrin                                                                 | 0 | 4 | 0 | 3 | 0 | 2 | 0 | 9  | N/A | 6.533E-03 | 18.5                     | ✓                    |                      |                                   |                                                                 |      | ✓          | ✓           | (26)                                                      |                                                        |   |   |   |   |   |   |   |   |
| 145 | P68037    | UB2L3  | Ubiquitin-conjugating enzyme E2 L3                                      | 0 | 3 | 0 | 3 | 0 | 3 | 0 | 9  | N/A | 0.000E+00 | 17.9                     | ✓                    |                      |                                   |                                                                 |      | ✓          |             | (26)                                                      |                                                        |   |   |   |   |   |   |   |   |
| 146 | Q9CWE0    | FA54B  | Protein FAM54B                                                          | 0 | 4 | 0 | 3 | 0 | 2 | 0 | 9  | N/A | 6.533E-03 | 31.7                     | ✓                    |                      |                                   |                                                                 |      | ✓          |             | (23)                                                      |                                                        |   |   |   |   |   |   |   |   |
| 147 | Q9CR86    | CHSP1  | Calcium-regulated heat stable protein 1                                 | 0 | 2 | 0 | 5 | 0 | 2 | 0 | 9  | N/A | 3.994E-02 | 16.1                     | ✓                    |                      |                                   |                                                                 |      | ✓          |             | (23)                                                      |                                                        |   |   |   |   |   |   |   |   |
| 148 | Q0VGB7    | PP4R2  | Serine/threonine-protein phosphatase 4 regulatory subunit 2             | 0 | 2 | 0 | 2 | 0 | 5 | 0 | 9  | N/A | 3.994E-02 | 46.4                     | ✓                    |                      |                                   |                                                                 |      |            |             | (23)                                                      |                                                        |   |   |   |   |   |   |   |   |
| 149 | Q99K51    | PLST   | Plastin-3                                                               | 0 | 2 | 0 | 3 | 0 | 4 | 0 | 9  | N/A | 6.533E-03 | 70.7                     | ✓                    |                      |                                   |                                                                 |      | ✓          |             |                                                           |                                                        |   |   |   |   |   |   |   |   |
| 150 | Q8K3A9    | MEPCE  | 75K snRNA methylphosphate capping enzyme                                | 0 | 2 | 0 | 5 | 0 | 2 | 0 | 9  | N/A | 3.994E-02 | 72.0                     | ✓                    |                      |                                   |                                                                 |      |            |             |                                                           |                                                        |   |   |   |   |   |   |   |   |
| 151 | Q8BIJ7    | RUFY1  | RUN and FYVE domain-containing protein 1                                | 0 | 4 | 0 | 1 | 0 | 4 | 0 | 9  | N/A | 3.994E-02 | 80.3                     | ✓                    |                      |                                   |                                                                 |      |            |             |                                                           |                                                        |   |   |   |   |   |   |   |   |
| 152 | Q6ZQK5    | ACAP2  | Arf-GAP with coiled-coil, ANK repeat and PH domain-containing protein 2 | 0 | 4 | 0 | 4 | 0 | 1 | 0 | 9  | N/A | 3.994E-02 | 87.2                     | ✓                    |                      |                                   |                                                                 |      | ✓          |             |                                                           |                                                        |   |   |   |   |   |   |   |   |
| 153 | Q5SSZ5    | TENS3  | Tensin-3                                                                | 0 | 3 | 0 | 4 | 0 | 2 | 0 | 9  | N/A | 6.533E-03 | 156                      | ✓                    |                      |                                   |                                                                 |      |            |             |                                                           |                                                        |   |   |   |   |   |   |   |   |
| 154 | E9QP59    | E9QP59 | Inner nuclear membrane protein Man1                                     | 0 | 3 | 0 | 3 | 0 | 3 | 0 | 9  | N/A | 0.000E+00 | 100                      | ✓                    |                      |                                   |                                                                 |      | ✓          |             |                                                           |                                                        |   |   |   |   |   |   |   |   |
| 155 | E9Q7G0    | E9Q7G0 | Protein Numa1                                                           | 0 | 3 | 0 | 4 | 0 | 2 | 0 | 9  | N/A | 6.533E-03 | 236                      | ✓                    |                      |                                   |                                                                 |      | ✓          |             |                                                           |                                                        |   |   |   |   |   |   |   |   |
| 156 | B7ZCP4    | B7ZCP4 | Copine I                                                                | 0 | 3 | 0 | 4 | 0 | 2 | 0 | 9  | N/A | 6.533E-03 | 52.8                     | ✓                    |                      |                                   |                                                                 |      | ✓          |             |                                                           |                                                        |   |   |   |   |   |   |   |   |
| 157 | A2AVJ7    | A2AVJ7 | Ribosome binding protein 1                                              | 0 | 2 | 0 | 4 | 0 | 3 | 0 | 9  | N/A | 6.533E-03 | 158                      | ✓                    |                      |                                   |                                                                 |      | ✓          |             |                                                           |                                                        |   |   |   |   |   |   |   |   |



|     |           |        |                                                                                  | 6AzGlcNAc     |   |               |   | Spectral Counts |   |     |   | Localization     |           |          |                           |  |                                               |  |      |        |        |                                             |                                          |      |
|-----|-----------|--------|----------------------------------------------------------------------------------|---------------|---|---------------|---|-----------------|---|-----|---|------------------|-----------|----------|---------------------------|--|-----------------------------------------------|--|------|--------|--------|---------------------------------------------|------------------------------------------|------|
|     |           |        |                                                                                  | Ex-periment 1 |   | Ex-periment 2 |   | Ex-periment 3   |   | Sum |   |                  |           |          |                           |  |                                               |  |      |        |        |                                             |                                          |      |
| No  | Accession | Gene   | Description                                                                      | -             | + | -             | + | -               | + | -   | + | Enrichment Ratio | t-test    | MW [kDa] | Exclusively Intracellular |  | Exclusively Extracellular, Lysosomal, Luminal |  | Both | GlcNAz | GalNAz | Previous O-GlcNAc Proteomics Identification | Previous Mucin Proteomics Identification |      |
|     |           |        |                                                                                  |               |   |               |   |                 |   |     |   |                  |           |          |                           |  |                                               |  |      |        |        |                                             |                                          |      |
| 158 | E9Q3T0    | E9Q3T0 | Uncharacterized protein                                                          | 0             | 3 | 0             | 3 | 0               | 3 | 0   | 9 | N/A              | 0.000E+00 | 11.4     |                           |  |                                               |  |      |        |        |                                             |                                          |      |
| 159 | Q9D6Z1    | NOP56  | Nucleolar protein 56                                                             | 0             | 3 | 0             | 3 | 0               | 2 | 0   | 8 | N/A              | 1.324E-03 | 64.4     | ✓                         |  |                                               |  |      |        |        |                                             | (9)(23)(26)                              | (16) |
| 160 | Q9EP82    | WDR4   | tRNA (guanine-N(7)-)-methyltransferase subunit WDR4                              | 0             | 2 | 0             | 3 | 0               | 3 | 0   | 8 | N/A              | 1.324E-03 | 45.7     | ✓                         |  |                                               |  |      |        |        |                                             | (9)(23)                                  |      |
| 161 | Q9CR00    | PSMD9  | 26S proteasome non-ATPase regulatory subunit 9                                   | 0             | 3 | 0             | 3 | 0               | 2 | 0   | 8 | N/A              | 1.324E-03 | 24.7     | ✓                         |  |                                               |  |      | ✓      |        |                                             | (9)(23)                                  |      |
| 162 | Q8BY71    | HAT1   | Histone acetyltransferase type B catalytic subunit                               | 0             | 3 | 0             | 3 | 0               | 2 | 0   | 8 | N/A              | 1.324E-03 | 49.2     | ✓                         |  |                                               |  |      |        |        |                                             | (9)(23)                                  |      |
| 163 | P43247    | MSH2   | DNA mismatch repair protein Msh2                                                 | 0             | 2 | 0             | 3 | 0               | 3 | 0   | 8 | N/A              | 1.324E-03 | 104      | ✓                         |  |                                               |  |      | ✓      |        |                                             | (9)(23)                                  |      |
| 164 | A2BE28-2  | LAS1L  | Isoform 2 of Ribosomal biogenesis protein LAS1L                                  | 0             | 2 | 0             | 4 | 0               | 2 | 0   | 8 | N/A              | 1.613E-02 | 87.5     | ✓                         |  |                                               |  |      |        |        |                                             | (9)(23)                                  |      |
| 165 | Q8VCF0    | MAVS   | Mitochondrial antiviral-signaling protein                                        | 0             | 3 | 0             | 3 | 0               | 2 | 0   | 8 | N/A              | 1.324E-03 | 53.4     | ✓                         |  |                                               |  |      | ✓      | ✓      |                                             | (5)(9)(20)(23)                           |      |
| 166 | Q6NZF1    | ZC11A  | Zinc finger CCCH domain-containing protein 11A                                   | 0             | 2 | 0             | 4 | 0               | 2 | 0   | 8 | N/A              | 1.613E-02 | 86.4     | ✓                         |  |                                               |  |      |        |        |                                             | (26)                                     |      |
| 167 | Q9CYA6    | ZCHC8  | Zinc finger CCHC domain-containing protein 8                                     | 0             | 1 | 0             | 3 | 0               | 4 | 0   | 8 | N/A              | 3.902E-02 | 78.0     | ✓                         |  |                                               |  |      | ✓      |        |                                             | (23)                                     |      |
| 168 | Q8BQ30    | PPR18  | Phostensin                                                                       | 0             | 2 | 0             | 3 | 0               | 3 | 0   | 8 | N/A              | 1.324E-03 | 65.6     | ✓                         |  |                                               |  |      |        |        |                                             | (23)                                     |      |
| 169 | Q6NSQ7    | LTV1   | Protein LTV1 homolog                                                             | 0             | 2 | 0             | 3 | 0               | 3 | 0   | 8 | N/A              | 1.324E-03 | 54.0     | ✓                         |  |                                               |  |      | ✓      |        |                                             | (23)                                     |      |
| 170 | Q9EP97    | SEN3   | Sentrin-specific protease 3                                                      | 0             | 3 | 0             | 3 | 0               | 2 | 0   | 8 | N/A              | 1.324E-03 | 64.4     | ✓                         |  |                                               |  |      |        |        |                                             |                                          |      |
| 171 | Q921Q7    | RIN1   | Ras and Rab interactor 1                                                         | 0             | 1 | 0             | 3 | 0               | 4 | 0   | 8 | N/A              | 3.902E-02 | 83.0     | ✓                         |  |                                               |  |      |        |        |                                             |                                          |      |
| 172 | Q8C8U0    | LIPB1  | Liprin-beta-1                                                                    | 0             | 2 | 0             | 4 | 0               | 2 | 0   | 8 | N/A              | 1.613E-02 | 109      | ✓                         |  |                                               |  |      |        |        |                                             |                                          |      |
| 173 | Q3V4D5    | Q3V4D5 | N-acetyltransferase ARD1 homolog                                                 | 0             | 3 | 0             | 3 | 0               | 2 | 0   | 8 | N/A              | 1.324E-03 | 24.8     | ✓                         |  |                                               |  |      |        |        |                                             |                                          |      |
| 174 | H3BKN0    | H3BKN0 | tRNA (cytosine(34)-C(5))-methyltransferase                                       | 0             | 4 | 0             | 2 | 0               | 2 | 0   | 8 | N/A              | 1.613E-02 | 81.3     | ✓                         |  |                                               |  |      |        |        |                                             |                                          |      |
| 175 | P35278    | RAB5C  | Ras-related protein Rab-5C                                                       | 0             | 3 | 0             | 1 | 0               | 3 | 0   | 7 | N/A              | 2.490E-02 | 23.4     | ✓                         |  |                                               |  |      | ✓      |        |                                             | (9)(23)(26)                              |      |
| 176 | Q6P5E6    | GGA2   | ADP-ribosylation factor-binding protein GGA2                                     | 0             | 2 | 0             | 2 | 0               | 3 | 0   | 7 | N/A              | 2.192E-03 | 66.0     | ✓                         |  |                                               |  | ✓    |        |        |                                             | (9)(23)                                  |      |
| 177 | Q9JKP5    | MBNL1  | Muscleblind-like protein 1 GN=Mbnl1 PE=1 SV=1 - [MBNL1_MOUSE                     | 0             | 2 | 0             | 3 | 0               | 2 | 0   | 7 | N/A              | 2.192E-03 | 37.0     | ✓                         |  |                                               |  | ✓    | ✓      |        |                                             | (9)(23)                                  |      |
| 178 | O88622-2  | PARG   | Isoform 2 of Poly(ADP-ribose) glycohydrolase                                     | 0             | 3 | 0             | 3 | 0               | 1 | 0   | 7 | N/A              | 2.490E-02 | 104      | ✓                         |  |                                               |  |      | ✓      |        |                                             | (9)(23)                                  |      |
| 179 | O54692    | ZW10   | Centromere/kinetochore protein zw10 homolog                                      | 0             | 2 | 0             | 3 | 0               | 2 | 0   | 7 | N/A              | 2.192E-03 | 88.0     | ✓                         |  |                                               |  |      |        |        |                                             | (9)(23)                                  |      |
| 180 | Q5PSV9    | MDC1   | Mediator of DNA damage checkpoint protein 1                                      | 0             | 2 | 0             | 3 | 0               | 2 | 0   | 7 | N/A              | 2.192E-03 | 185      | ✓                         |  |                                               |  |      | ✓      |        |                                             | (9)(14)(23)                              |      |
| 181 | Q9WVG6-2  | CARM1  | Isoform 2 of Histone-arginine methyltransferase CARM1                            | 0             | 2 | 0             | 3 | 0               | 2 | 0   | 7 | N/A              | 2.192E-03 | 63.4     | ✓                         |  |                                               |  |      | ✓      | ✓      |                                             | (5)(9)(19)(23)                           |      |
| 182 | Q9VWQ5    | MTNB   | Probable methylthioribulose-1-phosphate dehydratase                              | 0             | 3 | 0             | 3 | 0               | 1 | 0   | 7 | N/A              | 2.490E-02 | 26.9     | ✓                         |  |                                               |  |      |        |        |                                             | (23)                                     |      |
| 183 | Q6P5D8    | SMHD1  | Structural maintenance of chromosomes flexible hinge domain-containing protein 1 | 0             | 2 | 0             | 3 | 0               | 2 | 0   | 7 | N/A              | 2.192E-03 | 226      | ✓                         |  |                                               |  |      | ✓      |        |                                             | (23)                                     |      |
| 184 | Q3THS6    | METK2  | S-adenosylmethionine synthase isoform type-2                                     | 0             | 2 | 0             | 3 | 0               | 2 | 0   | 7 | N/A              | 2.192E-03 | 43.7     | ✓                         |  |                                               |  |      | ✓      |        |                                             | (20)                                     |      |
| 185 | Q921K2    | Q921K2 | Poly (ADP-ribose) polymerase family, member 1                                    | 0             | 3 | 0             | 2 | 0               | 2 | 0   | 7 | N/A              | 2.192E-03 | 113      | ✓                         |  |                                               |  |      | ✓      |        |                                             |                                          |      |
| 186 | Q8VE88-2  | F1142  | Isoform 2 of Protein FAM114A2                                                    | 0             | 2 | 0             | 3 | 0               | 2 | 0   | 7 | N/A              | 2.192E-03 | 53.3     | ✓                         |  |                                               |  |      | ✓      |        |                                             |                                          |      |
| 187 | Q8BP48    | AMPM1  | Methionine aminopeptidase 1                                                      | 0             | 2 | 0             | 3 | 0               | 2 | 0   | 7 | N/A              | 2.192E-03 | 43.2     | ✓                         |  |                                               |  |      | ✓      |        |                                             |                                          |      |
| 188 | Q3TT92    | Q3TT92 | Dihydropyrimidinase-related protein 3                                            | 0             | 1 | 0             | 3 | 0               | 3 | 0   | 7 | N/A              | 2.490E-02 | 61.7     | ✓                         |  |                                               |  |      | ✓      |        |                                             |                                          |      |
| 189 | P35123    | UBP4   | Ubiquitin carboxyl-terminal hydrolase 4                                          | 0             | 1 | 0             | 3 | 0               | 3 | 0   | 7 | N/A              | 2.490E-02 | 108      | ✓                         |  |                                               |  |      | ✓      |        |                                             |                                          |      |
| 190 | F7AC41    | F7AC41 | Protein Pus7 (Fragment)                                                          | 0             | 3 | 0             | 3 | 0               | 1 | 0   | 7 | N/A              | 2.490E-02 | 73.3     | ✓                         |  |                                               |  |      |        |        |                                             |                                          |      |
| 191 | A2A5R8    | A2A5R8 | Double-stranded RNA-binding protein Staufen homolog 1                            | 0             | 3 | 0             | 3 | 0               | 1 | 0   | 7 | N/A              | 2.490E-02 | 53.7     | ✓                         |  |                                               |  |      |        |        |                                             |                                          |      |
| 192 | Q62348    | TSN    | Translin                                                                         | 0             | 2 | 0             | 2 | 0               | 2 | 0   | 6 | N/A              | 0.000E+00 | 26.2     | ✓                         |  |                                               |  |      | ✓      | ✓      |                                             | (9)(23)(26)                              |      |
| 193 | Q9Z2X8    | KEAP1  | Kelch-like ECH-associated protein 1                                              | 0             | 3 | 0             | 1 | 0               | 2 | 0   | 6 | N/A              | 2.572E-02 | 69.5     | ✓                         |  |                                               |  |      |        |        |                                             | (9)(23)                                  |      |
| 194 | Q9Z1Z0-2  | USO1   | Isoform 2 of General vesicular transport factor p115                             | 0             | 2 | 0             | 3 | 0               | 1 | 0   | 6 | N/A              | 2.572E-02 | 100      | ✓                         |  |                                               |  |      | ✓      |        |                                             | (9)(23)                                  |      |
| 195 | Q9JJY4    | DDX20  | Probable ATP-dependent RNA helicase DDX20                                        | 0             | 2 | 0             | 2 | 0               | 2 | 0   | 6 | N/A              | 0.000E+00 | 91.7     | ✓                         |  |                                               |  |      |        |        |                                             | (9)(23)                                  |      |
| 196 | Q8K1R7    | NEK9   | Serine/threonine-protein kinase Nek9                                             | 0             | 2 | 0             | 3 | 0               | 1 | 0   | 6 | N/A              | 2.572E-02 | 107      | ✓                         |  |                                               |  |      | ✓      |        |                                             | (9)(23)                                  |      |
| 197 | Q8BIW1    | PRUNE  | Protein prune homolog                                                            | 0             | 2 | 0             | 2 | 0               | 2 | 0   | 6 | N/A              | 0.000E+00 | 50.2     | ✓                         |  |                                               |  |      |        |        |                                             | (9)(23)                                  |      |
| 198 | P61290    | PSME3  | Proteasome activator complex subunit 3                                           | 0             | 3 | 0             | 1 | 0               | 2 | 0   | 6 | N/A              | 2.572E-02 | 29.5     | ✓                         |  |                                               |  |      |        |        |                                             | (9)(23)                                  |      |
| 199 | P42669    | PURA   | Transcriptional activator protein Pur-alpha                                      | 0             | 3 | 0             | 2 | 0               | 1 | 0   | 6 | N/A              | 2.572E-02 | 34.9     | ✓                         |  |                                               |  |      | ✓      |        |                                             | (9)(20)(23)                              |      |

| 6AzGlcNAc            |                      |                      |     |
|----------------------|----------------------|----------------------|-----|
| Spectral Counts      |                      |                      |     |
| Ex-<br>peri-<br>ment | Ex-<br>peri-<br>ment | Ex-<br>peri-<br>ment | Sum |
| 1                    | 2                    | 3                    |     |

| No. | Accession | Gene   | Description                                                                       | Spectral Counts |   |   |   |   |   |   |   | Enrich-<br>ment<br>Ratio | t-test    | MW<br>[kDa] | Localization                      |                                                                 |      |            |              | Previous O-<br>GlcNAc Pro-<br>teomics Identi-<br>fication | Previous<br>Mucin<br>Proteomics<br>Identifica-<br>tion |
|-----|-----------|--------|-----------------------------------------------------------------------------------|-----------------|---|---|---|---|---|---|---|--------------------------|-----------|-------------|-----------------------------------|-----------------------------------------------------------------|------|------------|--------------|-----------------------------------------------------------|--------------------------------------------------------|
|     |           |        |                                                                                   | -               | + | - | + | - | + | - | + |                          |           |             | Exclusively<br>Intracellu-<br>lar | Exclusively<br>Extracellu-<br>lar, Lysoso-<br>mal, Lume-<br>nal | Both | GlcNA<br>z | Gal-<br>NAz  |                                                           |                                                        |
| 200 | Q76MZ3    | ZAAA   | Serine/threonine-protein phosphatase 2A 65 kDa regulatory subunit A alpha isoform | 0               | 2 | 0 | 2 | 0 | 2 | 0 | 6 | N/A                      | 0.000E+00 | 65.3        | ✓                                 |                                                                 | ✓    |            | (4)(14)      |                                                           |                                                        |
| 201 | Q64337    | SQSTM  | Sequestosome-1                                                                    | 0               | 3 | 0 | 2 | 0 | 1 | 0 | 6 | N/A                      | 2.572E-02 | 48.1        | ✓                                 |                                                                 | ✓    |            | (23)         |                                                           |                                                        |
| 202 | Q8BFS6-2  | CPPED  | Isoform 2 of Calcineurin-like phosphoesterase domain-containing protein 1         | 0               | 2 | 0 | 2 | 0 | 2 | 0 | 6 | N/A                      | 0.000E+00 | 33.4        | ✓                                 |                                                                 |      |            | (23)         |                                                           |                                                        |
| 203 | Q80XI4    | PI42B  | Phosphatidylinositol 5-phosphate 4-kinase type-2 beta                             | 0               | 1 | 0 | 3 | 0 | 2 | 0 | 6 | N/A                      | 2.572E-02 | 47.3        | ✓                                 |                                                                 |      |            | (23)         |                                                           |                                                        |
| 204 | Q80WT5-2  | AFTIN  | Isoform 2 of Aftiphilin                                                           | 0               | 2 | 0 | 2 | 0 | 2 | 0 | 6 | N/A                      | 0.000E+00 | 98.4        | ✓                                 |                                                                 |      |            | (23)         |                                                           |                                                        |
| 205 | Q8BQM4    | HEAT3  | HEAT repeat-containing protein 3                                                  | 0               | 2 | 0 | 2 | 0 | 2 | 0 | 6 | N/A                      | 0.000E+00 | 74.3        |                                   |                                                                 | ✓    |            | (23)         |                                                           |                                                        |
| 206 | P34022    | RANG   | Ran-specific GTPase-activating protein                                            | 0               | 1 | 0 | 2 | 0 | 3 | 0 | 6 | N/A                      | 2.572E-02 | 23.6        | ✓                                 |                                                                 |      |            | (19)(23)(26) |                                                           |                                                        |
| 207 | Q9CZP7-2  | CD37L  | Isoform 2 of Hsp90 co-chaperone Cdc37-like 1                                      | 0               | 3 | 0 | 2 | 0 | 1 | 0 | 6 | N/A                      | 2.572E-02 | 35.4        | ✓                                 |                                                                 |      |            |              |                                                           |                                                        |
| 208 | Q8R409    | HEX11  | Protein HEXIM1                                                                    | 0               | 2 | 0 | 3 | 0 | 1 | 0 | 6 | N/A                      | 2.572E-02 | 40.2        | ✓                                 |                                                                 |      |            |              |                                                           |                                                        |
| 209 | Q8K0C9    | GMD5   | GDP-mannose 4,6 dehydratase                                                       | 0               | 2 | 0 | 2 | 0 | 2 | 0 | 6 | N/A                      | 0.000E+00 | 42.0        | ✓                                 |                                                                 | ✓    |            |              |                                                           |                                                        |
| 210 | Q60848-2  | HELLS  | Isoform 2 of Lymphocyte-specific helicase                                         | 0               | 3 | 0 | 2 | 0 | 1 | 0 | 6 | N/A                      | 2.572E-02 | 93.7        | ✓                                 |                                                                 |      |            |              |                                                           |                                                        |
| 211 | P33174    | KIF4   | Chromosome-associated kinesin KIF4                                                | 0               | 3 | 0 | 1 | 0 | 2 | 0 | 6 | N/A                      | 2.572E-02 | 139         | ✓                                 |                                                                 |      |            |              |                                                           |                                                        |
| 212 | G3UW40    | G3UW40 | MCG4620, isoform CRA_b                                                            | 0               | 2 | 0 | 2 | 0 | 2 | 0 | 6 | N/A                      | 0.000E+00 | 92.8        | ✓                                 |                                                                 | ✓    |            |              |                                                           |                                                        |
| 213 | E9Q7L0    | E9Q7L0 | Protein Ogdhl                                                                     | 0               | 2 | 0 | 2 | 0 | 2 | 0 | 6 | N/A                      | 0.000E+00 | 117         | ✓                                 |                                                                 |      |            |              |                                                           |                                                        |
| 214 | D3YX62    | D3YX62 | Heme oxygenase 2 (Fragment)                                                       | 0               | 1 | 0 | 3 | 0 | 2 | 0 | 6 | N/A                      | 2.572E-02 | 26.4        | ✓                                 |                                                                 |      |            |              |                                                           |                                                        |
| 215 | B7ZCL8    | B7ZCL8 | 55 kDa erythrocyte membrane protein                                               | 0               | 3 | 0 | 1 | 0 | 2 | 0 | 6 | N/A                      | 2.572E-02 | 49.8        |                                   |                                                                 | ✓    |            |              |                                                           |                                                        |
| 216 | Q8BKCS    | IPO5   | Importin-5                                                                        | 0               | 1 | 0 | 2 | 0 | 2 | 0 | 5 | N/A                      | 7.490E-03 | 124         | ✓                                 |                                                                 | ✓    |            | (9)(23)      | (17)                                                      |                                                        |
| 217 | Q9JIH2    | NUP50  | Nuclear pore complex protein Nup50                                                | 0               | 2 | 0 | 2 | 0 | 1 | 0 | 5 | N/A                      | 7.490E-03 | 49.5        | ✓                                 |                                                                 | ✓    |            | (9)(23)      |                                                           |                                                        |
| 218 | Q8CAJ7    | TBL3   | Transducin beta-like protein 3                                                    | 0               | 2 | 0 | 1 | 0 | 2 | 0 | 5 | N/A                      | 7.490E-03 | 88.2        | ✓                                 |                                                                 |      |            | (9)(23)      |                                                           |                                                        |
| 219 | Q8BFY6    | PEF1   | Peflin                                                                            | 0               | 2 | 0 | 2 | 0 | 1 | 0 | 5 | N/A                      | 7.490E-03 | 29.2        | ✓                                 |                                                                 |      |            | (9)(23)      |                                                           |                                                        |
| 220 | Q7TNV0    | DEK    | Protein DEK                                                                       | 0               | 2 | 0 | 1 | 0 | 2 | 0 | 5 | N/A                      | 7.490E-03 | 43.1        | ✓                                 |                                                                 | ✓    |            | (9)(23)      |                                                           |                                                        |
| 221 | Q91VE6-2  | MK67I  | Isoform 2 of MKI67 FHA domain-interacting nucleolar phosphoprotein                | 0               | 1 | 0 | 2 | 0 | 2 | 0 | 5 | N/A                      | 7.490E-03 | 30.6        | ✓                                 |                                                                 |      |            | (23)         |                                                           |                                                        |
| 222 | O89032-3  | SPD2A  | Isoform 3 of SH3 and PX domain-containing protein 2A                              | 0               | 2 | 0 | 2 | 0 | 1 | 0 | 5 | N/A                      | 7.490E-03 | 119         | ✓                                 |                                                                 | ✓    |            |              |                                                           |                                                        |
| 223 | O55137    | ACOT1  | Acyl-coenzyme A thioesterase 1                                                    | 0               | 2 | 0 | 1 | 0 | 2 | 0 | 5 | N/A                      | 7.490E-03 | 46.1        | ✓                                 |                                                                 | ✓    |            |              |                                                           |                                                        |
| 224 | G3X8Q0    | G3X8Q0 | Trans-acting transcription factor 1                                               | 0               | 2 | 0 | 1 | 0 | 2 | 0 | 5 | N/A                      | 7.490E-03 | 80.4        | ✓                                 |                                                                 | ✓    | ✓          |              |                                                           |                                                        |
| 225 | E9Q310    | E9Q310 | Glucocorticoid receptor (Fragment)                                                | 0               | 2 | 0 | 2 | 0 | 1 | 0 | 5 | N/A                      | 7.490E-03 | 52.3        | ✓                                 |                                                                 |      |            |              |                                                           |                                                        |
| 226 | D3Z2M0    | D3Z2M0 | Cytoplasmic tRNA 2-thiolation protein 2 (Fragment)                                | 0               | 2 | 0 | 2 | 0 | 1 | 0 | 5 | N/A                      | 7.490E-03 | 27.3        | ✓                                 |                                                                 |      |            |              |                                                           |                                                        |
| 227 | F8VQ29    | F8VQ29 | Protein Iqgap3                                                                    | 0               | 1 | 0 | 2 | 0 | 2 | 0 | 5 | N/A                      | 7.490E-03 | 185         |                                   |                                                                 |      |            |              |                                                           |                                                        |
| 228 | Q61687    | ATRX   | Transcriptional regulator ATRX                                                    | 0               | 1 | 0 | 1 | 0 | 2 | 0 | 4 | N/A                      | 1.613E-02 | 278         | ✓                                 |                                                                 |      |            | (9)(23)(26)  |                                                           |                                                        |
| 229 | Q9WTX5    | SKP1   | S-phase kinase-associated protein 1                                               | 0               | 2 | 0 | 1 | 0 | 1 | 0 | 4 | N/A                      | 1.613E-02 | 18.7        | ✓                                 |                                                                 | ✓    |            | (9)(23)      |                                                           |                                                        |
| 230 | Q9D5T0    | ATAD1  | ATPase family AAA domain-containing protein 1                                     | 0               | 1 | 0 | 2 | 0 | 1 | 0 | 4 | N/A                      | 1.613E-02 | 40.7        | ✓                                 |                                                                 | ✓    |            | (9)(23)      |                                                           |                                                        |
| 231 | Q8VCH8    | UBXN4  | UBX domain-containing protein 4                                                   | 0               | 2 | 0 | 1 | 0 | 1 | 0 | 4 | N/A                      | 1.613E-02 | 56.4        | ✓                                 |                                                                 |      |            | (9)(23)      |                                                           |                                                        |
| 232 | Q8CG48    | SMC2   | Structural maintenance of chromosomes protein 2                                   | 0               | 1 | 0 | 2 | 0 | 1 | 0 | 4 | N/A                      | 1.613E-02 | 134         | ✓                                 |                                                                 |      |            | (9)(23)      |                                                           |                                                        |
| 233 | P15307    | REL    | Proto-oncogene c-Rel                                                              | 0               | 1 | 0 | 2 | 0 | 1 | 0 | 4 | N/A                      | 1.613E-02 | 64.9        | ✓                                 |                                                                 | ✓    | ✓          | (9)(23)      |                                                           |                                                        |
| 234 | Q9D8S9    | BOLA1  | BolA-like protein 1                                                               | 0               | 1 | 0 | 1 | 0 | 2 | 0 | 4 | N/A                      | 1.613E-02 | 14.4        |                                   |                                                                 |      |            | (9)(23)      |                                                           |                                                        |
| 235 | A2AAW9    | A2AAW9 | Eukaryotic translation initiation factor 2 subunit 3, X-linked                    | 0               | 1 | 0 | 1 | 0 | 2 | 0 | 4 | N/A                      | 1.613E-02 | 37.2        | ✓                                 |                                                                 | ✓    |            | (26)         |                                                           |                                                        |
| 236 | Q9JJV2-3  | PROF2  | Isoform 3 of Profilin-2                                                           | 0               | 1 | 0 | 1 | 0 | 2 | 0 | 4 | N/A                      | 1.613E-02 | 9.8         | ✓                                 |                                                                 |      |            | (23)         |                                                           |                                                        |
| 237 | Q8BI72    | CARF   | CDKN2A-interacting protein                                                        | 0               | 2 | 0 | 1 | 0 | 1 | 0 | 4 | N/A                      | 1.613E-02 | 59.7        | ✓                                 |                                                                 | ✓    |            | (23)         |                                                           |                                                        |
| 238 | Q03963    | E2AK2  | Interferon-induced, double-stranded RNA-activated protein kinase                  | 0               | 2 | 0 | 1 | 0 | 1 | 0 | 4 | N/A                      | 1.613E-02 | 58.2        | ✓                                 |                                                                 | ✓    |            | (23)         |                                                           |                                                        |
| 239 | P00493    | HPRT   | Hypoxanthine-guanine phosphoribosyltransferase                                    | 0               | 1 | 0 | 1 | 0 | 2 | 0 | 4 | N/A                      | 1.613E-02 | 24.6        | ✓                                 |                                                                 | ✓    |            | (19)         |                                                           |                                                        |
| 240 | Q62419    | SH3G1  | Endophilin-A2                                                                     | 0               | 1 | 0 | 1 | 0 | 2 | 0 | 4 | N/A                      | 1.613E-02 | 41.5        | ✓                                 |                                                                 |      |            | (1)(20)      |                                                           |                                                        |
| 241 | Q9JLJ5    | ELOV1  | Elongation of very long chain fatty acids protein 1                               | 0               | 2 | 0 | 1 | 0 | 1 | 0 | 4 | N/A                      | 1.613E-02 | 32.7        |                                   |                                                                 | ✓    | ✓          | ✓            |                                                           |                                                        |

|     |           |        |                                                                                      |   |   |   |   |   |   |   |   |                          |           | 6AzGlcNAc            |                                   |                      |                                                                 |              |      |            |             |                                                           |                                                        |   |   |  |  |  |  |  |  |
|-----|-----------|--------|--------------------------------------------------------------------------------------|---|---|---|---|---|---|---|---|--------------------------|-----------|----------------------|-----------------------------------|----------------------|-----------------------------------------------------------------|--------------|------|------------|-------------|-----------------------------------------------------------|--------------------------------------------------------|---|---|--|--|--|--|--|--|
|     |           |        |                                                                                      |   |   |   |   |   |   |   |   |                          |           | Spectral Counts      |                                   |                      |                                                                 |              |      |            |             |                                                           |                                                        |   |   |  |  |  |  |  |  |
|     |           |        |                                                                                      |   |   |   |   |   |   |   |   |                          |           | Ex-<br>peri-<br>ment | Ex-<br>peri-<br>ment              | Ex-<br>peri-<br>ment | Sum                                                             | Localization |      |            |             |                                                           |                                                        |   |   |  |  |  |  |  |  |
| No  | Accession | Gene   | Description                                                                          | - |   | + |   | - |   | + |   | Enrich-<br>ment<br>Ratio | t-test    | MW<br>[kDa]          | Exclusively<br>Intracellu-<br>lar |                      | Exclusively<br>Extracellu-<br>lar, Lysoso-<br>mal, Lume-<br>nal |              | Both | GlcNA<br>z | Gal-<br>NAz | Previous O-<br>GlcNAc Pro-<br>teomics Identi-<br>fication | Previous<br>Mucin<br>Proteomics<br>Identifica-<br>tion |   |   |  |  |  |  |  |  |
|     |           |        |                                                                                      | - | + | - | + | - | + | - | + |                          |           |                      | -                                 | +                    | -                                                               | +            |      |            |             |                                                           |                                                        | - | + |  |  |  |  |  |  |
| 242 | J3KMM5    | J3KMM5 | Sarcoplasmic/endoplasmic reticulum calcium ATPase 2                                  | 0 | 2 | 0 | 1 | 0 | 1 | 0 | 4 | N/A                      | 1.613E-02 | 110                  |                                   |                      |                                                                 |              | ✓    |            |             |                                                           |                                                        |   |   |  |  |  |  |  |  |
| 243 | E9Q9C5    | E9Q9C5 | V-type proton ATPase 16 kDa proteolipid subunit (Fragment)                           | 0 | 2 | 0 | 1 | 0 | 1 | 0 | 4 | N/A                      | 1.613E-02 | 15.3                 |                                   |                      |                                                                 |              | ✓    | ✓          |             |                                                           |                                                        |   |   |  |  |  |  |  |  |
| 244 | Q9R0X4    | ACOT9  | Acyl-coenzyme A thioesterase 9, mitochondrial                                        | 0 | 2 | 0 | 1 | 0 | 1 | 0 | 4 | N/A                      | 1.613E-02 | 50.5                 | ✓                                 |                      |                                                                 |              |      | ✓          |             |                                                           |                                                        |   |   |  |  |  |  |  |  |
| 245 | Q9CR51    | VATG1  | V-type proton ATPase subunit G 1                                                     | 0 | 1 | 0 | 1 | 0 | 2 | 0 | 4 | N/A                      | 1.613E-02 | 13.7                 | ✓                                 |                      |                                                                 |              |      | ✓          |             |                                                           |                                                        |   |   |  |  |  |  |  |  |
| 246 | Q91WG2-2  | RABE2  | Isoform 3 of Rab GTPase-binding effector protein 2                                   | 0 | 2 | 0 | 1 | 0 | 1 | 0 | 4 | N/A                      | 1.613E-02 | 54.3                 | ✓                                 |                      |                                                                 |              |      |            |             |                                                           |                                                        |   |   |  |  |  |  |  |  |
| 247 | Q60760-3  | GRB10  | Isoform 3 of Growth factor receptor-bound protein 10                                 | 0 | 2 | 0 | 1 | 0 | 1 | 0 | 4 | N/A                      | 1.613E-02 | 61.2                 | ✓                                 |                      |                                                                 |              |      |            |             |                                                           |                                                        |   |   |  |  |  |  |  |  |
| 248 | P35550    | FBRL   | rRNA 2'-O-methyltransferase fibrillar                                                | 0 | 1 | 0 | 2 | 0 | 1 | 0 | 4 | N/A                      | 1.613E-02 | 34.3                 | ✓                                 |                      |                                                                 |              |      |            |             |                                                           |                                                        |   |   |  |  |  |  |  |  |
| 249 | O70325-2  | GPX41  | Isoform Cytoplasmic of Phospholipid hydroperoxide glutathione peroxidase, mitochondr | 0 | 2 | 0 | 1 | 0 | 1 | 0 | 4 | N/A                      | 1.613E-02 | 19.5                 | ✓                                 |                      |                                                                 |              |      |            |             |                                                           |                                                        |   |   |  |  |  |  |  |  |
| 250 | O70305-2  | ATX2   | Isoform 2 of Ataxin-2                                                                | 0 | 1 | 0 | 1 | 0 | 2 | 0 | 4 | N/A                      | 1.613E-02 | 129                  | ✓                                 |                      |                                                                 |              |      | ✓          | ✓           |                                                           |                                                        |   |   |  |  |  |  |  |  |
| 251 | E9Q242    | E9Q242 | Adenylosuccinate lyase                                                               | 0 | 2 | 0 | 1 | 0 | 1 | 0 | 4 | N/A                      | 1.613E-02 | 53.1                 | ✓                                 |                      |                                                                 |              |      | ✓          |             |                                                           |                                                        |   |   |  |  |  |  |  |  |
| 252 | Q64514-2  | TPP2   | Isoform Short of Tripeptidyl-peptidase 2                                             | 0 | 1 | 0 | 1 | 0 | 1 | 0 | 3 | N/A                      | 0.000E+00 | 138                  | ✓                                 |                      |                                                                 |              |      | ✓          |             | (9)(23)                                                   |                                                        |   |   |  |  |  |  |  |  |
| 253 | Q3UHX0    | NOL8   | Nucleolar protein 8                                                                  | 0 | 1 | 0 | 1 | 0 | 1 | 0 | 3 | N/A                      | 0.000E+00 | 129                  | ✓                                 |                      |                                                                 |              |      | ✓          |             | (9)(23)                                                   |                                                        |   |   |  |  |  |  |  |  |
| 254 | Q3U5F4    | YRDC   | YrdC domain-containing protein, mitochondrial                                        | 0 | 1 | 0 | 1 | 0 | 1 | 0 | 3 | N/A                      | 0.000E+00 | 29.4                 | ✓                                 |                      |                                                                 |              |      | ✓          |             | (9)(23)                                                   |                                                        |   |   |  |  |  |  |  |  |
| 255 | P47856-2  | GFPT1  | Isoform 2 of Glutamine--fructose-6-phosphate aminotransferase [isomerizing] 1        | 0 | 1 | 0 | 1 | 0 | 1 | 0 | 3 | N/A                      | 0.000E+00 | 76.7                 | ✓                                 |                      |                                                                 |              |      | ✓          |             | (9)(23)                                                   |                                                        |   |   |  |  |  |  |  |  |
| 256 | Q69Z38    | PEAK1  | Pseudopodium-enriched atypical kinase 1                                              | 0 | 1 | 0 | 1 | 0 | 1 | 0 | 3 | N/A                      | 0.000E+00 | 191                  | ✓                                 |                      |                                                                 |              |      | ✓          |             | (9)(20)(23)                                               |                                                        |   |   |  |  |  |  |  |  |
| 257 | Q99LS3    | SERB   | Phosphoserine phosphatase                                                            | 0 | 1 | 0 | 1 | 0 | 1 | 0 | 3 | N/A                      | 0.000E+00 | 25.1                 | ✓                                 |                      |                                                                 |              |      | ✓          |             | (26)                                                      |                                                        |   |   |  |  |  |  |  |  |
| 258 | Q80YR4-2  | ZN598  | Isoform 2 of Zinc finger protein 598                                                 | 0 | 1 | 0 | 1 | 0 | 1 | 0 | 3 | N/A                      | 0.000E+00 | 96.3                 | ✓                                 |                      |                                                                 |              |      | ✓          |             | (23)                                                      |                                                        |   |   |  |  |  |  |  |  |
| 259 | P59708    | PM14   | Pre-mRNA branch site protein p14                                                     | 0 | 1 | 0 | 1 | 0 | 1 | 0 | 3 | N/A                      | 0.000E+00 | 14.6                 | ✓                                 |                      |                                                                 |              |      | ✓          |             | (23)                                                      |                                                        |   |   |  |  |  |  |  |  |
| 260 | G3X972    | G3X972 | Protein Sec24c                                                                       | 0 | 1 | 0 | 1 | 0 | 1 | 0 | 3 | N/A                      | 0.000E+00 | 119                  | ✓                                 |                      |                                                                 |              |      | ✓          | ✓           | (2)                                                       |                                                        |   |   |  |  |  |  |  |  |
| 261 | G3X928    | G3X928 | SEC23-interacting protein                                                            | 0 | 1 | 0 | 1 | 0 | 1 | 0 | 3 | N/A                      | 0.000E+00 | 111                  | ✓                                 |                      |                                                                 |              |      | ✓          | ✓           | (2)                                                       |                                                        |   |   |  |  |  |  |  |  |
| 262 | Q3TJZ6    | FA98A  | Protein FAM98A                                                                       | 0 | 1 | 0 | 1 | 0 | 1 | 0 | 3 | N/A                      | 0.000E+00 | 55.0                 | ✓                                 |                      |                                                                 |              |      | ✓          |             | (19)                                                      |                                                        |   |   |  |  |  |  |  |  |
| 263 | Q9DBR7    | MYPT1  | Protein phosphatase 1 regulatory subunit 12A                                         | 0 | 1 | 0 | 1 | 0 | 1 | 0 | 3 | N/A                      | 0.000E+00 | 115                  | ✓                                 |                      |                                                                 |              |      | ✓          | ✓           | (1)(5)(19)(20)(26)                                        |                                                        |   |   |  |  |  |  |  |  |
| 264 | Q9CRD0-3  | OCAD1  | Isoform 3 of OCIA domain-containing protein 1                                        | 0 | 1 | 0 | 1 | 0 | 1 | 0 | 3 | N/A                      | 0.000E+00 | 20.8                 | ✓                                 |                      |                                                                 |              |      | ✓          |             |                                                           |                                                        |   |   |  |  |  |  |  |  |
| 265 | Q99NB8    | UBQL4  | Ubiquilin-4                                                                          | 0 | 1 | 0 | 1 | 0 | 1 | 0 | 3 | N/A                      | 0.000E+00 | 63.5                 | ✓                                 |                      |                                                                 |              |      | ✓          | ✓           |                                                           |                                                        |   |   |  |  |  |  |  |  |
| 266 | Q91YS8    | KCC1A  | Calcium/calmodulin-dependent protein kinase type 1                                   | 0 | 1 | 0 | 1 | 0 | 1 | 0 | 3 | N/A                      | 0.000E+00 | 41.6                 | ✓                                 |                      |                                                                 |              |      | ✓          |             |                                                           |                                                        |   |   |  |  |  |  |  |  |
| 267 | Q8K124    | PKHO2  | Pleckstrin homology domain-containing family O member 2                              | 0 | 1 | 0 | 1 | 0 | 1 | 0 | 3 | N/A                      | 0.000E+00 | 53.8                 | ✓                                 |                      |                                                                 |              |      | ✓          |             |                                                           |                                                        |   |   |  |  |  |  |  |  |
| 268 | Q8C0V0    | TLK1   | Serine/threonine-protein kinase tousled-like 1                                       | 0 | 1 | 0 | 1 | 0 | 1 | 0 | 3 | N/A                      | 0.000E+00 | 86.6                 | ✓                                 |                      |                                                                 |              |      | ✓          |             |                                                           |                                                        |   |   |  |  |  |  |  |  |
| 269 | Q8BIW9    | CTF18  | Chromosome transmission fidelity protein 18 homolog                                  | 0 | 1 | 0 | 1 | 0 | 1 | 0 | 3 | N/A                      | 0.000E+00 | 108                  | ✓                                 |                      |                                                                 |              |      | ✓          |             |                                                           |                                                        |   |   |  |  |  |  |  |  |
| 270 | Q62074    | KPCI   | Protein kinase C iota type                                                           | 0 | 1 | 0 | 1 | 0 | 1 | 0 | 3 | N/A                      | 0.000E+00 | 68.2                 | ✓                                 |                      |                                                                 |              |      | ✓          |             |                                                           |                                                        |   |   |  |  |  |  |  |  |
| 271 | Q3V3Y9    | Q3V3Y9 | Kinesin-like protein KIF1C                                                           | 0 | 1 | 0 | 1 | 0 | 1 | 0 | 3 | N/A                      | 0.000E+00 | 47.1                 | ✓                                 |                      |                                                                 |              |      | ✓          |             |                                                           |                                                        |   |   |  |  |  |  |  |  |
| 272 | Q3TZX8-3  | NOL9   | Isoform 3 of Polynucleotide 5'-hydroxyl-kinase NOL9                                  | 0 | 1 | 0 | 1 | 0 | 1 | 0 | 3 | N/A                      | 0.000E+00 | 70.9                 | ✓                                 |                      |                                                                 |              |      | ✓          |             |                                                           |                                                        |   |   |  |  |  |  |  |  |
| 273 | Q3TFP0    | Q3TFP0 | FUS interacting protein (Serine-arginine rich) 1                                     | 0 | 1 | 0 | 1 | 0 | 1 | 0 | 3 | N/A                      | 0.000E+00 | 22.1                 | ✓                                 |                      |                                                                 |              |      | ✓          |             |                                                           |                                                        |   |   |  |  |  |  |  |  |
| 274 | P70445    | 4EBP2  | Eukaryotic translation initiation factor 4E-binding protein 2                        | 0 | 1 | 0 | 1 | 0 | 1 | 0 | 3 | N/A                      | 0.000E+00 | 12.9                 | ✓                                 |                      |                                                                 |              |      | ✓          |             |                                                           |                                                        |   |   |  |  |  |  |  |  |
| 275 | P63166    | SUMO1  | Small ubiquitin-related modifier 1                                                   | 0 | 1 | 0 | 1 | 0 | 1 | 0 | 3 | N/A                      | 0.000E+00 | 11.5                 | ✓                                 |                      |                                                                 |              |      | ✓          |             |                                                           |                                                        |   |   |  |  |  |  |  |  |
| 276 | P31938    | MP2K1  | Dual specificity mitogen-activated protein kinase kinase 1                           | 0 | 1 | 0 | 1 | 0 | 1 | 0 | 3 | N/A                      | 0.000E+00 | 43.4                 | ✓                                 |                      |                                                                 |              |      | ✓          |             |                                                           |                                                        |   |   |  |  |  |  |  |  |
| 277 | O09110-2  | MP2K3  | Isoform 1 of Dual specificity mitogen-activated protein kinase kinase 3              | 0 | 1 | 0 | 1 | 0 | 1 | 0 | 3 | N/A                      | 0.000E+00 | 35.8                 | ✓                                 |                      |                                                                 |              |      | ✓          |             |                                                           |                                                        |   |   |  |  |  |  |  |  |
| 278 | J3QP68    | J3QP68 | Uncharacterized protein                                                              | 0 | 1 | 0 | 1 | 0 | 1 | 0 | 3 | N/A                      | 0.000E+00 | 41.1                 | ✓                                 |                      |                                                                 |              |      | ✓          |             |                                                           |                                                        |   |   |  |  |  |  |  |  |
| 279 | J3JS94    | J3JS94 | L antigen family member 3                                                            | 0 | 1 | 0 | 1 | 0 | 1 | 0 | 3 | N/A                      | 0.000E+00 | 11.6                 | ✓                                 |                      |                                                                 |              |      | ✓          |             |                                                           |                                                        |   |   |  |  |  |  |  |  |
| 280 | H3BKK2    | H3BKK2 | Protein D2Ertd750e (Fragment)                                                        | 0 | 1 | 0 | 1 | 0 | 1 | 0 | 3 | N/A                      | 0.000E+00 | 20.6                 | ✓                                 |                      |                                                                 |              |      | ✓          |             |                                                           |                                                        |   |   |  |  |  |  |  |  |
| 281 | G3UZ44    | G3UZ44 | Paired mesoderm homeobox protein 1                                                   | 0 | 1 | 0 | 1 | 0 | 1 | 0 | 3 | N/A                      | 0.000E+00 | 22.5                 | ✓                                 |                      |                                                                 |              |      | ✓          |             |                                                           |                                                        |   |   |  |  |  |  |  |  |
| 282 | E9Q986    | E9Q986 | Catenin delta-1                                                                      | 0 | 1 | 0 | 1 | 0 | 1 | 0 | 3 | N/A                      | 0.000E+00 | 92.4                 | ✓                                 |                      |                                                                 |              |      | ✓          |             |                                                           |                                                        |   |   |  |  |  |  |  |  |
| 283 | E9Q7M2    | E9Q7M2 | Protein Tsc22d2                                                                      | 0 | 1 | 0 | 1 | 0 | 1 | 0 | 3 | N/A                      | 0.000E+00 | 78.1                 | ✓                                 |                      |                                                                 |              |      | ✓          |             |                                                           |                                                        |   |   |  |  |  |  |  |  |

|     |           |        |                                                                                       |   |    |   |    |   |    |   |    |                          |           | 6AzGlcNAc            |                                   |                                                                 |      |              |                    |                                                           |                                                        |  |  |  |  |  |  |  |  |  |  |
|-----|-----------|--------|---------------------------------------------------------------------------------------|---|----|---|----|---|----|---|----|--------------------------|-----------|----------------------|-----------------------------------|-----------------------------------------------------------------|------|--------------|--------------------|-----------------------------------------------------------|--------------------------------------------------------|--|--|--|--|--|--|--|--|--|--|
|     |           |        |                                                                                       |   |    |   |    |   |    |   |    |                          |           | Spectral Counts      |                                   |                                                                 |      |              |                    |                                                           |                                                        |  |  |  |  |  |  |  |  |  |  |
|     |           |        |                                                                                       |   |    |   |    |   |    |   |    |                          |           | Ex-<br>peri-<br>ment | Ex-<br>peri-<br>ment              | Ex-<br>peri-<br>ment                                            | Sum  | Localization |                    |                                                           |                                                        |  |  |  |  |  |  |  |  |  |  |
| No  | Accession | Gene   | Description                                                                           | - |    | + |    | - |    | + |    | Enrich-<br>ment<br>Ratio | t-test    | MW<br>[kDa]          | Exclusively<br>Intracellu-<br>lar | Exclusively<br>Extracellu-<br>lar, Lysoso-<br>mal, Lume-<br>nal | Both | GlcNA<br>z   | Gal-<br>NAz        | Previous O-<br>GlcNAc Pro-<br>teomics Identi-<br>fication | Previous<br>Mucin<br>Proteomics<br>Identifica-<br>tion |  |  |  |  |  |  |  |  |  |  |
|     |           |        |                                                                                       | - | +  | - | +  | - | +  | - | +  |                          |           |                      |                                   |                                                                 |      |              |                    |                                                           |                                                        |  |  |  |  |  |  |  |  |  |  |
| 284 | E9Q5L7    | E9Q5L7 | PHD finger protein 10                                                                 | 0 | 1  | 0 | 1  | 0 | 1  | 0 | 3  | N/A                      | 0.000E+00 | 26.9                 | ✓                                 |                                                                 |      | ✓            |                    |                                                           |                                                        |  |  |  |  |  |  |  |  |  |  |
| 285 | D3Z4W3    | D3Z4W3 | Proline-rich AKT1 substrate 1                                                         | 0 | 1  | 0 | 1  | 0 | 1  | 0 | 3  | N/A                      | 0.000E+00 | 9.7                  | ✓                                 |                                                                 |      |              |                    |                                                           |                                                        |  |  |  |  |  |  |  |  |  |  |
| 286 | D3YVJ7    | D3YVJ7 | Protein Akr1b3 (Fragment)                                                             | 0 | 1  | 0 | 1  | 0 | 1  | 0 | 3  | N/A                      | 0.000E+00 | 19.6                 | ✓                                 |                                                                 |      |              |                    |                                                           |                                                        |  |  |  |  |  |  |  |  |  |  |
| 287 | D3YUC9    | D3YUC9 | Methionine-R-sulfoxide reductase B3, mitochondrial                                    | 0 | 1  | 0 | 1  | 0 | 1  | 0 | 3  | N/A                      | 0.000E+00 | 12.1                 | ✓                                 |                                                                 |      | ✓            |                    |                                                           |                                                        |  |  |  |  |  |  |  |  |  |  |
| 288 | A2AG83    | A2AG83 | 26S proteasome non-ATPase regulatory subunit 10                                       | 0 | 1  | 0 | 1  | 0 | 1  | 0 | 3  | N/A                      | 0.000E+00 | 16.2                 | ✓                                 |                                                                 |      | ✓            |                    |                                                           |                                                        |  |  |  |  |  |  |  |  |  |  |
| 289 | A2A4Z1    | A2A4Z1 | Ubiquitin-conjugating enzyme E2 C                                                     | 0 | 1  | 0 | 1  | 0 | 1  | 0 | 3  | N/A                      | 0.000E+00 | 18.5                 | ✓                                 |                                                                 |      |              |                    |                                                           |                                                        |  |  |  |  |  |  |  |  |  |  |
| 290 | O54931-2  | AKAP2  | Isoform 2 of A-kinase anchor protein 2                                                | 0 | 23 | 1 | 26 | 0 | 26 | 1 | 75 | 75.00                    | 1.977E-05 | 97.1                 | ✓                                 |                                                                 | ✓    | ✓            | (9)(23)(26)        |                                                           |                                                        |  |  |  |  |  |  |  |  |  |  |
| 291 | P07742    | RIR1   | Ribonucleoside-diphosphate reductase large subunit                                    | 0 | 17 | 1 | 21 | 0 | 20 | 1 | 58 | 58.00                    | 1.083E-04 | 90.2                 | ✓                                 |                                                                 | ✓    | ✓            | (14)(23)(26)       |                                                           |                                                        |  |  |  |  |  |  |  |  |  |  |
| 292 | Q61033    | LAP2A  | Lamina-associated polypeptide 2, isoforms alpha/zeta                                  | 1 | 20 | 0 | 19 | 0 | 12 | 1 | 51 | 51.00                    | 2.785E-03 | 75.1                 | ✓                                 |                                                                 | ✓    | ✓            | (23)(26)           |                                                           |                                                        |  |  |  |  |  |  |  |  |  |  |
| 293 | P80314    | TCPB   | T-complex protein 1 subunit beta                                                      | 1 | 16 | 0 | 16 | 0 | 18 | 1 | 50 | 50.00                    | 2.566E-05 | 57.4                 | ✓                                 |                                                                 | ✓    | ✓            | (5)(26)            |                                                           |                                                        |  |  |  |  |  |  |  |  |  |  |
| 294 | Q6DFW4    | NOP58  | Nucleolar protein 58                                                                  | 1 | 17 | 0 | 14 | 0 | 17 | 1 | 48 | 48.00                    | 1.193E-04 | 60.3                 | ✓                                 |                                                                 | ✓    | ✓            | (9)(23)(26)        |                                                           |                                                        |  |  |  |  |  |  |  |  |  |  |
| 295 | P60335    | PCBP1  | Poly(rC)-binding protein 1                                                            | 0 | 14 | 1 | 16 | 0 | 17 | 1 | 47 | 47.00                    | 8.364E-05 | 37.5                 | ✓                                 |                                                                 | ✓    | ✓            | (9)(14)(23)(26)    |                                                           |                                                        |  |  |  |  |  |  |  |  |  |  |
| 296 | Q60854    | SPB6   | Serpin B6                                                                             | 0 | 13 | 1 | 20 | 0 | 13 | 1 | 46 | 46.00                    | 3.126E-03 | 42.6                 | ✓                                 |                                                                 | ✓    | ✓            | (26)               |                                                           |                                                        |  |  |  |  |  |  |  |  |  |  |
| 297 | Q80X90    | FLNB   | Filamin-B                                                                             | 0 | 14 | 1 | 11 | 0 | 15 | 1 | 40 | 40.00                    | 4.786E-04 | 278                  | ✓                                 |                                                                 | ✓    | ✓            | (9)(23)(26)        |                                                           |                                                        |  |  |  |  |  |  |  |  |  |  |
| 298 | Q61990    | PCBP2  | Poly(rC)-binding protein 2                                                            | 0 | 9  | 1 | 14 | 0 | 13 | 1 | 36 | 36.00                    | 1.724E-03 | 38.2                 | ✓                                 |                                                                 | ✓    | ✓            | (5)(14)(26)        | (17)                                                      |                                                        |  |  |  |  |  |  |  |  |  |  |
| 299 | Q8BFW7    | LPP    | Lipoma-preferred partner homolog                                                      | 0 | 13 | 1 | 13 | 0 | 10 | 1 | 36 | 36.00                    | 3.790E-04 | 65.8                 | ✓                                 |                                                                 | ✓    | ✓            | (9)(20)(23)(26)    | (16)                                                      |                                                        |  |  |  |  |  |  |  |  |  |  |
| 300 | Q62167    | DDX3X  | ATP-dependent RNA helicase DDX3X                                                      | 0 | 13 | 1 | 13 | 0 | 10 | 1 | 36 | 36.00                    | 3.790E-04 | 73.1                 | ✓                                 |                                                                 | ✓    | ✓            | (9)(23)(26)        |                                                           |                                                        |  |  |  |  |  |  |  |  |  |  |
| 301 | Q9D0E1-2  | HNRPM  | Isoform 2 of Heterogeneous nuclear ribonucleoprotein M                                | 1 | 25 | 1 | 25 | 0 | 20 | 2 | 70 | 35.00                    | 1.828E-04 | 73.7                 | ✓                                 |                                                                 | ✓    | ✓            | (23)               |                                                           |                                                        |  |  |  |  |  |  |  |  |  |  |
| 302 | Q60598    | SRC8   | Src substrate cortactin                                                               | 0 | 10 | 1 | 10 | 0 | 13 | 1 | 33 | 33.00                    | 5.368E-04 | 61.2                 | ✓                                 |                                                                 | ✓    | ✓            | (20)(26)           |                                                           |                                                        |  |  |  |  |  |  |  |  |  |  |
| 303 | Q61074    | PPM1G  | Protein phosphatase 1G                                                                | 0 | 11 | 1 | 7  | 0 | 10 | 1 | 28 | 28.00                    | 1.956E-03 | 58.7                 | ✓                                 |                                                                 | ✓    | ✓            | (9)(23)            |                                                           |                                                        |  |  |  |  |  |  |  |  |  |  |
| 304 | O08553    | DPYL2  | Dihydropyrimidinase-related protein 2                                                 | 0 | 9  | 1 | 6  | 0 | 12 | 1 | 27 | 27.00                    | 7.966E-03 | 62.2                 | ✓                                 |                                                                 | ✓    | ✓            | (1)(20)            |                                                           |                                                        |  |  |  |  |  |  |  |  |  |  |
| 305 | A2AFJ1    | A2AFJ1 | Histone-binding protein RBBP7                                                         | 0 | 10 | 1 | 7  | 0 | 9  | 1 | 26 | 26.00                    | 9.045E-04 | 46.9                 | ✓                                 |                                                                 | ✓    | ✓            | (26)               |                                                           |                                                        |  |  |  |  |  |  |  |  |  |  |
| 306 | P70698    | PYRG1  | CTP synthase 1                                                                        | 1 | 9  | 0 | 9  | 0 | 8  | 1 | 26 | 26.00                    | 6.015E-05 | 66.6                 | ✓                                 |                                                                 | ✓    | ✓            | (23)(26)           |                                                           |                                                        |  |  |  |  |  |  |  |  |  |  |
| 307 | E9PVC5    | E9PVC5 | Eukaryotic translation initiation factor 4 gamma 1                                    | 0 | 6  | 1 | 10 | 0 | 10 | 1 | 26 | 26.00                    | 3.736E-03 | 175                  | ✓                                 |                                                                 | ✓    | ✓            | (12)               |                                                           |                                                        |  |  |  |  |  |  |  |  |  |  |
| 308 | Q8CGC7    | SYEP   | Bifunctional glutamate/proline--tRNA ligase                                           | 1 | 16 | 1 | 13 | 0 | 14 | 2 | 43 | 21.50                    | 1.317E-04 | 170                  | ✓                                 |                                                                 | ✓    | ✓            | (14)(19)(23)(26)   |                                                           |                                                        |  |  |  |  |  |  |  |  |  |  |
| 309 | Q61699-2  | HS105  | Isoform HSP105-beta of Heat shock protein 105 kDa                                     | 0 | 20 | 3 | 21 | 0 | 20 | 3 | 61 | 20.33                    | 5.199E-05 | 91.6                 | ✓                                 |                                                                 | ✓    | ✓            | (5)(23)            |                                                           |                                                        |  |  |  |  |  |  |  |  |  |  |
| 310 | Q91VI7    | RINI   | Ribonuclease inhibitor                                                                | 0 | 8  | 1 | 6  | 0 | 6  | 1 | 20 | 20.00                    | 1.052E-03 | 49.8                 | ✓                                 |                                                                 | ✓    | ✓            | (23)               |                                                           |                                                        |  |  |  |  |  |  |  |  |  |  |
| 311 | Q9CQX2    | CYB5B  | Cytochrome b5 type B                                                                  | 1 | 5  | 0 | 9  | 0 | 5  | 1 | 19 | 19.00                    | 1.201E-02 | 16.3                 | ✓                                 |                                                                 | ✓    | ✓            | (26)               |                                                           |                                                        |  |  |  |  |  |  |  |  |  |  |
| 312 | D3Z5M2    | D3Z5M2 | Protein Gm10110                                                                       | 0 | 14 | 2 | 12 | 0 | 9  | 2 | 35 | 17.50                    | 2.337E-03 | 67.7                 | ✓                                 |                                                                 | ✓    | ✓            |                    |                                                           |                                                        |  |  |  |  |  |  |  |  |  |  |
| 313 | Q8CI51    | PDLI5  | PDZ and LIM domain protein 5                                                          | 0 | 11 | 2 | 10 | 0 | 13 | 2 | 34 | 17.00                    | 6.454E-04 | 63.3                 | ✓                                 |                                                                 | ✓    | ✓            | (1)(23)(26)        |                                                           |                                                        |  |  |  |  |  |  |  |  |  |  |
| 314 | Q99K70    | RRAGC  | Ras-related GTP-binding protein C                                                     | 0 | 7  | 1 | 5  | 0 | 5  | 1 | 17 | 17.00                    | 2.019E-03 | 44.1                 | ✓                                 |                                                                 | ✓    | ✓            | (9)(23)            |                                                           |                                                        |  |  |  |  |  |  |  |  |  |  |
| 315 | P16045    | LEG1   | Galectin-1                                                                            | 1 | 35 | 2 | 35 | 3 | 29 | 6 | 99 | 16.50                    | 1.184E-04 | 14.9                 |                                   |                                                                 | ✓    | ✓            | (23)               | (17)                                                      |                                                        |  |  |  |  |  |  |  |  |  |  |
| 316 | Q8BGJ5    | Q8BGJ5 | MCG13402, isoform CRA_a                                                               | 0 | 14 | 1 | 13 | 2 | 22 | 3 | 49 | 16.33                    | 6.185E-03 | 56.9                 | ✓                                 |                                                                 | ✓    | ✓            | (26)               |                                                           |                                                        |  |  |  |  |  |  |  |  |  |  |
| 317 | Q3U0V1    | FUBP2  | Far upstream element-binding protein 2                                                | 1 | 26 | 2 | 29 | 2 | 25 | 5 | 80 | 16.00                    | 3.656E-05 | 76.7                 | ✓                                 |                                                                 | ✓    | ✓            | (14)(23)(26)       |                                                           |                                                        |  |  |  |  |  |  |  |  |  |  |
| 318 | P06151    | LDHA   | L-lactate dehydrogenase A chain                                                       | 1 | 17 | 1 | 13 | 1 | 15 | 3 | 45 | 15.00                    | 2.655E-04 | 36.5                 | ✓                                 |                                                                 | ✓    | ✓            | (6)(9)(23)(24)(26) | (17)                                                      |                                                        |  |  |  |  |  |  |  |  |  |  |
| 319 | Q8R3C0    | MCMBP  | Mini-chromosome maintenance complex-binding protein                                   | 0 | 5  | 1 | 7  | 0 | 3  | 1 | 15 | 15.00                    | 1.780E-02 | 72.8                 | ✓                                 |                                                                 | ✓    | ✓            | (9)(23)            |                                                           |                                                        |  |  |  |  |  |  |  |  |  |  |
| 320 | Q61029-3  | LAP2B  | Isoform Epsilon of Lamina-associated polypeptide 2, isoforms beta/delta/epsilon/gamma | 1 | 10 | 1 | 11 | 0 | 7  | 2 | 28 | 14.00                    | 2.253E-03 | 46.0                 | ✓                                 |                                                                 | ✓    | ✓            | (26)               |                                                           |                                                        |  |  |  |  |  |  |  |  |  |  |
| 321 | Q9JIF0-3  | ANM1   | Isoform 3 of Protein arginine N-methyltransferase 1                                   | 0 | 15 | 2 | 14 | 1 | 12 | 3 | 41 | 13.67                    | 2.749E-04 | 39.6                 | ✓                                 |                                                                 | ✓    | ✓            | (26)               | (17)                                                      |                                                        |  |  |  |  |  |  |  |  |  |  |
| 322 | Q6IRU2    | TPM4   | Tropomyosin alpha-4 chain                                                             | 1 | 13 | 1 | 15 | 1 | 12 | 3 | 40 | 13.33                    | 1.517E-04 | 28.5                 | ✓                                 |                                                                 | ✓    | ✓            | (9)(23)(26)        |                                                           |                                                        |  |  |  |  |  |  |  |  |  |  |
| 323 | P25206    | MCM3   | DNA replication licensing factor MCM3                                                 | 0 | 6  | 1 | 4  | 0 | 3  | 1 | 13 | 13.00                    | 1.324E-02 | 91.5                 | ✓                                 |                                                                 | ✓    | ✓            | (9)(23)            |                                                           |                                                        |  |  |  |  |  |  |  |  |  |  |
| 324 | Q91V92    | ACLY   | ATP-citrate synthase                                                                  | 1 | 2  | 0 | 5  | 0 | 5  | 1 | 12 | 12.00                    | 2.539E-02 | 120                  | ✓                                 |                                                                 | ✓    | ✓            | (9)(14)(23)(26)    | (17)                                                      |                                                        |  |  |  |  |  |  |  |  |  |  |
| 325 | Q501J6    | DDX17  | Probable ATP-dependent RNA helicase DDX17                                             | 0 | 3  | 0 | 3  | 1 | 5  | 1 | 11 | 11.00                    | 1.106E-02 | 72.4                 | ✓                                 |                                                                 | ✓    | ✓            | (5)(9)(23)(26)     |                                                           |                                                        |  |  |  |  |  |  |  |  |  |  |

| 6AzGlcNAc            |                      |                      |     |
|----------------------|----------------------|----------------------|-----|
| Spectral Counts      |                      |                      |     |
| Ex-<br>peri-<br>ment | Ex-<br>peri-<br>ment | Ex-<br>peri-<br>ment | Sum |
| 1                    | 2                    | 3                    |     |

| No. | Accession | Gene   | Description                                                                 |    |    |    |    |    |    |           |            | Enrich-<br>ment<br>Ratio | t-test    | MW<br>[kDa] | Localization                      |                                                                 |      |            |                             | Previous O-<br>GlcNAc Pro-<br>teomics Identi-<br>fication | Previous<br>Mucin<br>Proteomics<br>Identifica-<br>tion |
|-----|-----------|--------|-----------------------------------------------------------------------------|----|----|----|----|----|----|-----------|------------|--------------------------|-----------|-------------|-----------------------------------|-----------------------------------------------------------------|------|------------|-----------------------------|-----------------------------------------------------------|--------------------------------------------------------|
|     |           |        |                                                                             | -  | +  | -  | +  | -  | +  | -         | +          |                          |           |             | Exclusively<br>Intracellu-<br>lar | Exclusively<br>Extracellu-<br>lar, Lysoso-<br>mal, Lume-<br>nal | Both | GlcNA<br>z | Gal-<br>NAz                 |                                                           |                                                        |
| 326 | Q9WUM4    | COR1C  | Coronin-1C                                                                  | 0  | 6  | 2  | 5  | 0  | 9  | <b>2</b>  | <b>20</b>  | 10.00                    | 1.201E-02 | 53.1        | ✓                                 |                                                                 | ✓    |            | (14)(26)                    |                                                           |                                                        |
| 327 | Q8VDM4    | PSMD2  | 26S proteasome non-ATPase regulatory subunit 2                              | 0  | 11 | 3  | 9  | 0  | 9  | <b>3</b>  | <b>29</b>  | 9.67                     | 1.961E-03 | 100         | ✓                                 |                                                                 | ✓    |            | (9)(19)(23)                 |                                                           |                                                        |
| 328 | Q8BGD9    | IF4B   | Eukaryotic translation initiation factor 4B                                 | 2  | 15 | 2  | 17 | 1  | 13 | <b>5</b>  | <b>45</b>  | 9.00                     | 3.755E-04 | 68.8        | ✓                                 |                                                                 | ✓    |            | (26)                        |                                                           |                                                        |
| 329 | P63242    | IF5A1  | Eukaryotic translation initiation factor 5A-1                               | 1  | 8  | 1  | 6  | 0  | 4  | <b>2</b>  | <b>18</b>  | 9.00                     | 1.135E-02 | 16.8        | ✓                                 |                                                                 |      |            | (14)(23)(26)                | (17)                                                      |                                                        |
| 330 | Q9WVA4    | TAGL2  | Transgelin-2                                                                | 0  | 6  | 2  | 7  | 0  | 5  | <b>2</b>  | <b>18</b>  | 9.00                     | 3.772E-03 | 22.4        | ✓                                 |                                                                 | ✓    |            | (23)(26)                    |                                                           |                                                        |
| 331 | P30681    | HMGB2  | High mobility group protein B2                                              | 1  | 3  | 0  | 4  | 0  | 2  | <b>1</b>  | <b>9</b>   | 9.00                     | 1.613E-02 | 24.1        | ✓                                 |                                                                 |      |            | (9)(23)(26)                 |                                                           |                                                        |
| 332 | P14733    | LMNB1  | Lamin-B1                                                                    | 0  | 4  | 1  | 3  | 0  | 2  | <b>1</b>  | <b>9</b>   | 9.00                     | 1.613E-02 | 66.7        | ✓                                 |                                                                 | ✓    | ✓          | (9)(23)                     |                                                           |                                                        |
| 333 | Q11011    | PSA    | Puromycin-sensitive aminopeptidase                                          | 0  | 4  | 1  | 3  | 0  | 2  | <b>1</b>  | <b>9</b>   | 9.00                     | 1.613E-02 | 103         | ✓                                 |                                                                 | ✓    |            | (5)(23)                     |                                                           |                                                        |
| 334 | Q921F2    | TADBP  | TAR DNA-binding protein 43                                                  | 0  | 3  | 1  | 3  | 0  | 3  | <b>1</b>  | <b>9</b>   | 9.00                     | 1.324E-03 | 44.5        | ✓                                 |                                                                 | ✓    |            | (14)(26)                    |                                                           |                                                        |
| 335 | A1BN54    | A1BN54 | Alpha actinin 1a                                                            | 0  | 21 | 3  | 23 | 4  | 17 | <b>7</b>  | <b>61</b>  | 8.71                     | 1.083E-03 | 103         | ✓                                 |                                                                 | ✓    |            | (26)                        |                                                           |                                                        |
| 336 | Q791V5    | MTCH2  | Mitochondrial carrier homolog 2                                             | 1  | 4  | 1  | 6  | 0  | 6  | <b>2</b>  | <b>16</b>  | 8.00                     | 3.320E-03 | 33.5        | ✓                                 |                                                                 | ✓    |            | (9)(23)                     |                                                           |                                                        |
| 337 | Q9CPP0    | NPM3   | Nucleoplasmin-3                                                             | 0  | 2  | 1  | 3  | 0  | 3  | <b>1</b>  | <b>8</b>   | 8.00                     | 7.763E-03 | 19.0        | ✓                                 |                                                                 |      |            | (9)(19)(23)(26)             |                                                           |                                                        |
| 338 | H7BWX9    | H7BWX9 | Small ubiquitin-related modifier 2                                          | 0  | 3  | 1  | 3  | 0  | 2  | <b>1</b>  | <b>8</b>   | 8.00                     | 7.763E-03 | 6.0         | ✓                                 |                                                                 |      |            |                             |                                                           |                                                        |
| 339 | Q62523    | ZYX    | Zyxin                                                                       | 0  | 4  | 2  | 5  | 0  | 4  | <b>2</b>  | <b>13</b>  | 6.50                     | 7.933E-03 | 60.5        | ✓                                 |                                                                 | ✓    | ✓          | (1)(9)(23)(26)              |                                                           |                                                        |
| 340 | P61979-3  | HNRPK  | Isoform 3 of Heterogeneous nuclear ribonucleoprotein K                      | 5  | 21 | 3  | 16 | 1  | 17 | <b>9</b>  | <b>54</b>  | 6.00                     | 1.434E-03 | 48.5        | ✓                                 |                                                                 | ✓    |            | (5)(8)(14)(23)(24)(26)      |                                                           |                                                        |
| 341 | G3UX26    | G3UX26 | Voltage-dependent anion-selective channel protein 2 (Fragment)              | 5  | 23 | 3  | 20 | 4  | 26 | <b>12</b> | <b>69</b>  | 5.75                     | 4.815E-04 | 30.4        | ✓                                 |                                                                 | ✓    |            |                             |                                                           |                                                        |
| 342 | Q8BGQ7    | SYAC   | Alanine-tRNA ligase, cytoplasmic                                            | 1  | 5  | 1  | 8  | 1  | 4  | <b>3</b>  | <b>17</b>  | 5.67                     | 1.780E-02 | 107         | ✓                                 |                                                                 | ✓    |            | (23)(26)                    | (17)                                                      |                                                        |
| 343 | P17751    | TPIS   | Triosephosphate isomerase                                                   | 2  | 12 | 3  | 9  | 1  | 11 | <b>6</b>  | <b>32</b>  | 5.33                     | 1.193E-03 | 32.2        | ✓                                 |                                                                 | ✓    |            | (5)(19)(23)(26)             | (17)                                                      |                                                        |
| 344 | Q9CQ65    | MTAP   | S-methyl-5'-thioadenosine phosphorylase                                     | 2  | 11 | 3  | 14 | 3  | 16 | <b>8</b>  | <b>41</b>  | 5.13                     | 1.798E-03 | 31.0        | ✓                                 |                                                                 | ✓    |            | (9)(23)(26)                 | (17)                                                      |                                                        |
| 345 | Q8VHX6-2  | FLNC   | Isoform 2 of Filamin-C                                                      | 0  | 2  | 1  | 1  | 0  | 2  | <b>1</b>  | <b>5</b>   | 5.00                     | 4.742E-02 | 287         | ✓                                 |                                                                 |      |            | (9)(23)                     |                                                           |                                                        |
| 346 | Q9CZY3    | UB2V1  | Ubiquitin-conjugating enzyme E2 variant 1                                   | 0  | 2  | 0  | 2  | 1  | 1  | <b>1</b>  | <b>5</b>   | 5.00                     | 4.742E-02 | 16.3        | ✓                                 |                                                                 |      |            | (23)                        |                                                           |                                                        |
| 347 | P07356    | ANXA2  | Annexin A2                                                                  | 3  | 23 | 7  | 25 | 5  | 24 | <b>15</b> | <b>72</b>  | 4.80                     | 1.240E-04 | 38.7        | ✓                                 |                                                                 | ✓    |            | (8)(9)(23)(26)              | (17)                                                      |                                                        |
| 348 | P68254-2  | 1433T  | Isoform 2 of 14-3-3 protein theta                                           | 1  | 9  | 1  | 10 | 3  | 5  | <b>5</b>  | <b>24</b>  | 4.80                     | 1.910E-02 | 27.7        | ✓                                 |                                                                 | ✓    | ✓          | (5)(8)(23)(26)              | (17)                                                      |                                                        |
| 349 | Q61024    | ASNS   | Asparagine synthetase [glutamine-hydrolyzing]                               | 0  | 8  | 3  | 11 | 4  | 14 | <b>7</b>  | <b>33</b>  | 4.71                     | 1.472E-02 | 64.2        | ✓                                 |                                                                 | ✓    |            | (9)(23)(26)                 |                                                           |                                                        |
| 350 | Q02053    | UBA1   | Ubiquitin-like modifier-activating enzyme 1                                 | 0  | 7  | 4  | 9  | 2  | 12 | <b>6</b>  | <b>28</b>  | 4.67                     | 1.680E-02 | 118         | ✓                                 |                                                                 |      |            | (5)(9)(14)(23)              |                                                           |                                                        |
| 351 | P18760    | COF1   | Cofilin-1                                                                   | 3  | 9  | 2  | 10 | 1  | 9  | <b>6</b>  | <b>28</b>  | 4.67                     | 3.882E-04 | 18.5        | ✓                                 |                                                                 | ✓    | ✓          | (14)(19)(23)(26)            |                                                           |                                                        |
| 352 | P46935    | NEDD4  | E3 ubiquitin-protein ligase NEDD4                                           | 8  | 33 | 10 | 44 | 8  | 43 | <b>26</b> | <b>120</b> | 4.62                     | 9.338E-04 | 103         | ✓                                 |                                                                 | ✓    |            | (1)(20)(26)                 |                                                           |                                                        |
| 353 | Q60749    | KHDR1  | KH domain-containing, RNA-binding, signal transduction-associated protein 1 | 1  | 3  | 1  | 4  | 1  | 6  | <b>3</b>  | <b>13</b>  | 4.33                     | 1.944E-02 | 48.3        | ✓                                 |                                                                 | ✓    |            | (14)(26)                    |                                                           |                                                        |
| 354 | J3QPE8    | J3QPE8 | MCG16555                                                                    | 4  | 9  | 1  | 10 | 2  | 10 | <b>7</b>  | <b>29</b>  | 4.14                     | 1.473E-03 | 30.7        | ✓                                 |                                                                 | ✓    | ✓          |                             |                                                           |                                                        |
| 355 | A2AL12    | A2AL12 | Heterogeneous nuclear ribonucleoprotein A3                                  | 4  | 13 | 3  | 13 | 3  | 14 | <b>10</b> | <b>40</b>  | 4.00                     | 2.920E-05 | 34.5        | ✓                                 |                                                                 | ✓    |            | (5)(26)                     |                                                           |                                                        |
| 356 | Q7TPV4    | MBB1A  | Myb-binding protein 1A                                                      | 4  | 12 | 5  | 8  | 0  | 14 | <b>9</b>  | <b>34</b>  | 3.78                     | 2.335E-02 | 152         | ✓                                 |                                                                 |      |            | (26)                        |                                                           |                                                        |
| 357 | Q9Z2X1    | HNRPF  | Heterogeneous nuclear ribonucleoprotein F                                   | 5  | 21 | 7  | 25 | 6  | 21 | <b>18</b> | <b>67</b>  | 3.72                     | 3.567E-04 | 45.7        | ✓                                 |                                                                 |      |            | (23)(26)                    | (17)                                                      |                                                        |
| 358 | P58252    | EF2    | Elongation factor 2                                                         | 7  | 20 | 4  | 23 | 7  | 20 | <b>18</b> | <b>63</b>  | 3.50                     | 4.472E-04 | 95.3        | ✓                                 |                                                                 | ✓    |            | (5)(8)(14)(23)(26)          | (17)                                                      |                                                        |
| 359 | E9PVM7    | E9PVM7 | Glutathione S-transferase Mu 5 (Fragment)                                   | 1  | 3  | 1  | 2  | 0  | 2  | <b>2</b>  | <b>7</b>   | 3.50                     | 2.411E-02 | 25.5        | ✓                                 |                                                                 |      |            |                             |                                                           |                                                        |
| 360 | B7FAU9    | B7FAU9 | Filamin, alpha                                                              | 2  | 19 | 8  | 16 | 5  | 17 | <b>15</b> | <b>52</b>  | 3.47                     | 3.159E-03 | 280         | ✓                                 |                                                                 | ✓    |            | (26)                        |                                                           |                                                        |
| 361 | P16858    | G3P    | Glyceraldehyde-3-phosphate dehydrogenase                                    | 20 | 64 | 21 | 67 | 20 | 67 | <b>61</b> | <b>198</b> | 3.25                     | 1.697E-06 | 35.8        | ✓                                 |                                                                 | ✓    |            | (1)(2)(4)(6)(8)(23)(24)(26) |                                                           |                                                        |
| 362 | E9Q7H5    | E9Q7H5 | Uncharacterized protein                                                     | 5  | 11 | 3  | 11 | 3  | 13 | <b>11</b> | <b>35</b>  | 3.18                     | 1.058E-03 | 32.6        |                                   |                                                                 | ✓    |            | (5)                         |                                                           |                                                        |
| 363 | P57780    | ACTN4  | Alpha-actinin-4                                                             | 0  | 8  | 2  | 10 | 6  | 7  | <b>8</b>  | <b>25</b>  | 3.13                     | 4.531E-02 | 105         | ✓                                 |                                                                 |      |            | (9)(23)                     | (17)                                                      |                                                        |
| 364 | P10107    | ANXA1  | Annexin A1                                                                  | 5  | 16 | 5  | 19 | 6  | 14 | <b>16</b> | <b>49</b>  | 3.06                     | 1.798E-03 | 38.7        | ✓                                 |                                                                 | ✓    |            | (26)                        | (17)                                                      |                                                        |
| 365 | E9Q070    | E9Q070 | Uncharacterized protein                                                     | 1  | 3  | 1  | 4  | 1  | 2  | <b>3</b>  | <b>9</b>   | 3.00                     | 2.572E-02 | 34.2        | ✓                                 |                                                                 |      |            |                             |                                                           |                                                        |
| 366 | Q8C1B7-3  | SEP11  | Isoform 3 of Septin-11                                                      | 0  | 2  | 1  | 2  | 1  | 2  | <b>2</b>  | <b>6</b>   | 3.00                     | 1.613E-02 | 48.9        | ✓                                 |                                                                 |      |            |                             |                                                           |                                                        |

## References:

- 1 Alfaro, J. F. et al. Tandem mass spectrometry identifies many mouse brain O-GlcNAcylated proteins including EGF domain-specific O-GlcNAc transferase targets. *Proc Natl Acad Sci USA* 109, 7280–7285 (2012).
- 2 Boyce, M. et al. Metabolic cross-talk allows labeling of O-linked (beta)-N-acetylglucosamine-modified proteins via the N-acetylgalactosamine salvage pathway. *Proc Natl Acad Sci USA* 108, 3141–3146 (2011).
- 3 Carlsson, S. R., Lycksell, P. O. & Fukuda, M. Assignment of O-glycan attachment sites to the hinge-like regions of human lysosomal membrane glycoproteins lamp-1 and lamp-2. *Arch. Biochem. Biophys.* 304, 65–73 (1993).
- 4 Cieniewski-Bernard, C. Identification of O-linked N-Acetylglucosamine Proteins in Rat Skeletal Muscle Using Two-dimensional Gel Electrophoresis and Mass Spectrometry. *Mol Cell Proteomics* 3, 577–585 (2004).
- 5 Clark, P. M. et al. Direct In-Gel Fluorescence Detection and Cellular Imaging of O-GlcNAc-Modified Proteins. *J Am Chem Soc* 130, 11576–11577 (2008).
- 6 Dehennaut, V. et al. Identification of structural and functional O-linked N-acetylglucosamine-bearing proteins in *Xenopus laevis* oocyte. *Mol Cell Proteomics* 7, 2229–2245 (2008).
- 7 Fujiwara, S., Shinkai, H., Mann, K. & Timpl, R. Structure and Localization. *Matrix Collagen and Related Research* 13, 215–222 (1993).
- 8 Gurcel, C. et al. Identification of new O-GlcNAc modified proteins using a click-chemistry-based tagging. *Anal Bioanal Chem* 390, 2089–2097 (2008).
- 9 Hahne, H. et al. Proteome Wide Purification and Identification of O-GlcNAc-Modified Proteins Using Click Chemistry and Mass Spectrometry. *J Proteome Res* 12, 927–936 (2013).
- 10 Hubbard, S. C., Boyce, M., McVaugh, C. T., Peehl, D. M. & Bertozzi, C. R. Cell surface glycoproteomic analysis of prostate cancer-derived PC-3 cells. *Bioorg. Med. Chem. Lett.* 21, 4945–4950 (2011).
- 11 Kaneko, M. et al. Functional sialylated O-glycan to platelet aggregation on Aggrus (T1alpha/Podoplanin) molecules expressed in Chinese hamster ovary cells. *J. Biol. Chem.* 279, 38838–38843 (2004).
- 12 Khidekel, N. et al. Probing the dynamics of O-GlcNAc glycosylation in the brain using quantitative proteomics. *Nat Chem Biol* 3, 339–348 (2007).
- 13 Khidekel, N., Ficarro, S., Peters, E. & Hsieh-Wilson, L. Exploring the O-GlcNAc proteome: direct identification of O-GlcNAc-modified proteins from the brain. *Proc Natl Acad Sci USA* 101, 13132–13137 (2004).
- 14 Nandi, A. et al. Global identification of O-GlcNAc-modified proteins. *Anal Chem* 78, 452–458 (2006).
- 15 Schjoldager, K. T. B. et al. Probing isoform-specific functions of polypeptide GalNAc-transferases using zinc finger nuclease glycoengineered SimpleCells. *Proceedings of the National Academy of Sciences* 109, 9893–9898 (2012).
- 16 Steentoft, C. et al. ResourcePrecision mapping of the human O-GalNAc glycoproteome through SimpleCell technology. *EMBO J.* 32, 1478–1488 (2013).
- 17 Slade, P. G., Hajivandi, M., Bartel, C. M. & Gorfien, S. F. Identifying the CHO secretome using mucin-type O-linked glycosylation and click-chemistry. *J. Proteome Res.* 11, 6175–6186 (2012).
- 18 Sprung, R. et al. Tagging-via-substrate strategy for probing O-GlcNAc modified proteins. *J Proteome Res* 4, 950–957 (2005).
- 19 Teo, C. F. et al. Glycopeptide-specific monoclonal antibodies suggest new roles for O-GlcNAc. *Nat Chem Biol* 6, 338–343 (2010).
- 20 Trinidad, J. C. et al. Global identification and characterization of both O-GlcNAcylation and phosphorylation at the murine synapse. *Mol Cell Proteomics* 11, 215–229 (2012).
- 21 Vosseller, K. et al. O-linked N-acetylglucosamine proteomics of postsynaptic density preparations using lectin weak affinity chromatography and mass spectrometry. *Mol Cell Proteomics* 5, 923–934 (2006).
- 22 Wang, Z. et al. Enrichment and Site Mapping of O-Linked N-Acetylglucosamine by a Combination of Chemical/Enzymatic Tagging, Photochemical Cleavage, and Electron Transfer Dissociation Mass Spectrometry. *Mol Cell Proteomics* 9, 153–160 (2010).
- 23 Wang, Z. et al. Extensive Crosstalk Between O-GlcNAcylation and Phosphorylation Regulates Cytokinesis. *Science Signaling* 3, ra2 (2010).
- 24 Wang, Z., Pandey, A. & Hart, G. W. Dynamic Interplay between O-Linked N-Acetylglucosaminylation and Glycogen Synthase Kinase-3-dependent Phosphorylation. *Mol Cell Proteomics* 6, 1365–1379 (2007).
- 25 Wells, L. et al. Mapping sites of O-GlcNAc modification using affinity tags for serine and threonine post-translational modifications. *Mol Cell Proteomics* 1, 791–804 (2002).
- 26 Zaro, B. W., Yang, Y.-Y., Hang, H. C. & Pratt, M. R. Chemical reporters for fluorescent detection and identification of O-GlcNAc-modified proteins reveal glycosylation of the ubiquitin ligase NEDD4-1. *Proc Natl Acad Sci USA* 108, 8146–8151 (2011).

**Supplementary Table 2.** Proteins identified using GlcNAz enrichment. NIH 3T3 were treated in triplicate with either Ac<sub>4</sub>GlcNAz (200 μM, +) or Ac<sub>4</sub>GlcNAc (200 μM, -) for 16 hours. At this time the cell lysates were subjected to CuAAC with alkyne-biotin, followed by enrichment with streptavidin beads and on-bead trypsinolysis. Labeled proteins were selected as those that were represented by at least 1 unique-peptide in each Ac<sub>4</sub>GlcNAz treated sample, a total of at least 3 spectral-counts from the same three samples, and at least a total of 3 times more spectral counts in the Ac<sub>4</sub>GlcNAz treated samples compared to Ac<sub>4</sub>GlcNAc. Blue indicates proteins previously identified in O-GlcNAc proteomic studies, purple indicates proteins identified in both O-GlcNAc and O-linked mucin proteomic studies and red indicates proteins identified in only O-linked mucin proteomic studies. Novel proteins that were identified in this study are indicated in white.

| No. | Accession | Gene   | Description                                                               | GlcNAz Spectral Counts |    |               |    |               |    |     |               | Enrichment Ratio | t-test    | MW [kDa] | Localization                                  |      |           |        |   | Previous O-GlcNAc Proteomics Identification | Previous Mucin Proteomics Identification |
|-----|-----------|--------|---------------------------------------------------------------------------|------------------------|----|---------------|----|---------------|----|-----|---------------|------------------|-----------|----------|-----------------------------------------------|------|-----------|--------|---|---------------------------------------------|------------------------------------------|
|     |           |        |                                                                           | Ex-periment 1          |    | Ex-periment 2 |    | Ex-periment 3 |    | Sum | Intracellular |                  |           |          | Exclusively Extracellular, Lysosomal, Luminal | Both | 6AzGlcNAc | GalNAz |   |                                             |                                          |
|     |           |        |                                                                           | -                      | +  | -             | +  | -             | +  |     |               |                  |           |          |                                               |      |           |        | - |                                             |                                          |
| 1   | P27546-2  | MAP4   | Isoform 2 of Microtubule-associated protein 4                             | 0                      | 35 | 0             | 31 | 0             | 35 | 0   | 101           | N/A              | 1.461E-05 | 117      | ✓                                             |      |           | ✓      | ✓ | (19)(23)(26)                                |                                          |
| 2   | Q80X50-5  | UBP2L  | Isoform 5 of Ubiquitin-associated protein 2-like                          | 0                      | 28 | 0             | 26 | 0             | 30 | 0   | 84            | N/A              | 1.716E-05 | 117      | ✓                                             |      |           |        | ✓ | (5)(9)(19)(23)(26)                          |                                          |
| 3   | Q80X50-2  | UBP2L  | Isoform 2 of Ubiquitin-associated protein 2-like                          | 0                      | 27 | 0             | 25 | 0             | 29 | 0   | 81            | N/A              | 1.983E-05 | 107      | ✓                                             |      |           |        | ✓ | (5)(9)(19)(23)(26)                          |                                          |
| 4   | P30416    | FKBP4  | Peptidyl-prolyl cis-trans isomerase FKBP4                                 | 0                      | 21 | 0             | 21 | 0             | 18 | 0   | 60            | N/A              | 3.688E-05 | 51.5     | ✓                                             |      |           |        | ✓ | (5)(23)(26)                                 |                                          |
| 5   | Q61191    | HCFC1  | Host cell factor 1                                                        | 0                      | 17 | 0             | 18 | 0             | 25 | 0   | 60            | N/A              | 1.358E-03 | 210      | ✓                                             |      |           |        | ✓ | (1)(2)(13)(19)(20)(21)(22)(23)(24)(26)      |                                          |
| 6   | Q3THK7    | GUAA   | GMP synthase [glutamine-hydrolyzing]                                      | 0                      | 20 | 0             | 16 | 0             | 19 | 0   | 55            | N/A              | 1.077E-04 | 76.7     | ✓                                             |      |           |        | ✓ | (26)                                        |                                          |
| 7   | Q8VCQ8    | Q8VCQ8 | Caldesmon 1                                                               | 0                      | 15 | 0             | 17 | 0             | 17 | 0   | 49            | N/A              | 1.647E-05 | 60.4     | ✓                                             |      |           |        | ✓ | (26)                                        |                                          |
| 8   | P40124    | CAP1   | Adenylyl cyclase-associated protein 1                                     | 0                      | 17 | 0             | 15 | 0             | 15 | 0   | 47            | N/A              | 1.944E-05 | 51.5     |                                               |      | ✓         |        | ✓ | (23)(26)                                    |                                          |
| 9   | Q9QUR6    | PPCE   | Prolyl endopeptidase                                                      | 0                      | 14 | 0             | 12 | 0             | 20 | 0   | 46            | N/A              | 3.098E-03 | 80.7     | ✓                                             |      |           |        | ✓ | (26)                                        | (17)                                     |
| 10  | Q3UZ39    | LRRF1  | Leucine-rich repeat flightless-interacting protein 1                      | 0                      | 14 | 0             | 14 | 0             | 18 | 0   | 46            | N/A              | 3.264E-04 | 79.2     | ✓                                             |      |           |        | ✓ | (23)(26)                                    |                                          |
| 11  | Q3TLH4-5  | PRC2C  | Isoform 5 of Protein PRC2C                                                | 0                      | 18 | 0             | 17 | 0             | 11 | 0   | 46            | N/A              | 2.175E-03 | 302      | ✓                                             |      |           |        | ✓ | (19)(23)(26)                                |                                          |
| 12  | Q61584-5  | FXR1   | Isoform D of Fragile X mental retardation syndrome-related protein 1      | 0                      | 14 | 0             | 13 | 0             | 18 | 0   | 45            | N/A              | 6.030E-04 | 69.7     | ✓                                             |      |           |        | ✓ |                                             |                                          |
| 13  | Q9ERGO    | LIMA1  | LIM domain and actin-binding protein 1                                    | 0                      | 15 | 0             | 15 | 0             | 14 | 0   | 44            | N/A              | 1.595E-06 | 84.0     | ✓                                             |      |           |        | ✓ | (9)(23)(26)                                 |                                          |
| 14  | Q63850    | NUP62  | Nuclear pore glycoprotein p62                                             | 0                      | 13 | 0             | 16 | 0             | 14 | 0   | 43            | N/A              | 8.387E-05 | 53.2     | ✓                                             |      |           |        | ✓ | (2)(19)(23)(26)                             | (17)                                     |
| 15  | G3X928    | G3X928 | SEC23-interacting protein                                                 | 0                      | 13 | 0             | 15 | 0             | 12 | 0   | 40            | N/A              | 1.116E-04 | 111      | ✓                                             |      |           |        | ✓ | (2)(9)                                      |                                          |
| 16  | O88532    | ZFR    | Zinc finger RNA-binding protein                                           | 0                      | 13 | 0             | 11 | 0             | 15 | 0   | 39            | N/A              | 3.546E-04 | 117      | ✓                                             |      |           |        | ✓ | (1)(5)(12)(13)(19)(20)(26)                  |                                          |
| 17  | Q99PG2    | OGFR   | Opioid growth factor receptor                                             | 0                      | 11 | 0             | 18 | 0             | 10 | 0   | 39            | N/A              | 6.672E-03 | 70.6     | ✓                                             |      |           |        | ✓ |                                             |                                          |
| 18  | Q8K4Z5    | SF3A1  | Splicing factor 3A subunit 1                                              | 0                      | 13 | 0             | 12 | 0             | 13 | 0   | 38            | N/A              | 2.864E-06 | 88.5     | ✓                                             |      |           |        | ✓ | (23)(26)                                    | (17)                                     |
| 19  | Q9DCL9    | PUR6   | Multifunctional protein ADE2                                              | 0                      | 14 | 0             | 10 | 0             | 14 | 0   | 38            | N/A              | 6.852E-04 | 47.0     | ✓                                             |      |           |        | ✓ | (18)(19)(23)(26)                            |                                          |
| 20  | Q9Z110-2  | P5CS   | Isoform Short of Delta-1-pyrroline-5-carboxylate synthase                 | 0                      | 8  | 0             | 12 | 0             | 13 | 0   | 33            | N/A              | 1.971E-03 | 87.0     | ✓                                             |      |           |        | ✓ | (9)(23)(26)                                 |                                          |
| 21  | A2AMY5    | A2AMY5 | Ubiquitin-associated protein 2                                            | 0                      | 12 | 0             | 13 | 0             | 8  | 0   | 33            | N/A              | 1.971E-03 | 118      | ✓                                             |      |           |        | ✓ |                                             |                                          |
| 22  | B1AU75    | B1AU75 | Nuclear autoantigenic sperm protein                                       | 0                      | 7  | 0             | 15 | 0             | 10 | 0   | 32            | N/A              | 1.025E-02 | 84.0     | ✓                                             |      |           |        | ✓ | (26)                                        |                                          |
| 23  | Q3TW96    | UAP1L  | UDP-N-acetylhexosamine pyrophosphorylase-like protein 1                   | 0                      | 11 | 0             | 10 | 0             | 10 | 0   | 31            | N/A              | 6.452E-06 | 56.6     | ✓                                             |      |           |        | ✓ | (9)                                         |                                          |
| 24  | Q9Z1F9    | SAE2   | SUMO-activating enzyme subunit 2                                          | 0                      | 8  | 0             | 11 | 0             | 12 | 0   | 31            | N/A              | 1.006E-03 | 70.5     | ✓                                             |      |           |        | ✓ | (26)                                        |                                          |
| 25  | Q9QZM0    | UBQL2  | Ubiquilin-2                                                               | 0                      | 9  | 0             | 10 | 0             | 12 | 0   | 31            | N/A              | 3.035E-04 | 67.3     | ✓                                             |      |           |        | ✓ |                                             |                                          |
| 26  | Q9CZD3    | SYG    | Glycine--tRNA ligase GN=Gars PE=1 SV=1 - [SYG_MOUSE]                      | 0                      | 10 | 0             | 9  | 0             | 11 | 0   | 30            | N/A              | 6.521E-05 | 81.8     | ✓                                             |      |           |        | ✓ | ✓                                           | (9)(14)(23)(26)                          |
| 27  | Q6XLQ8    | Q6XLQ8 | Calumenin GN=Calu PE=2 SV=1 - [Q6XLQ8_MOUSE]                              | 0                      | 9  | 0             | 8  | 0             | 13 | 0   | 30            | N/A              | 2.814E-03 | 37.1     |                                               |      |           | ✓      | ✓ | (9)                                         |                                          |
| 28  | O70318    | E41L2  | Band 4.1-like protein 2 GN=Epb4112 PE=1 SV=2 - [E41L2_MOUSE]              | 0                      | 9  | 0             | 13 | 0             | 8  | 0   | 30            | N/A              | 2.814E-03 | 110      | ✓                                             |      |           |        | ✓ | ✓                                           | (20)(23)                                 |
| 29  | P58871    | TB182  | 182 kDa tankyrase-1-binding protein GN=Tnks1bp1 PE=1 SV=2 - [TB182_MOUSE] | 0                      | 8  | 0             | 10 | 0             | 12 | 0   | 30            | N/A              | 9.781E-04 | 182      | ✓                                             |      |           |        | ✓ | ✓                                           | (1)(20)(23)(26)                          |

|     |           |        |                                                                                                        | GlcNAz          |       |       |     |   |    |   |    |                  |           |          |                           |                                               |      |           |        |                              |                                          |  |  |
|-----|-----------|--------|--------------------------------------------------------------------------------------------------------|-----------------|-------|-------|-----|---|----|---|----|------------------|-----------|----------|---------------------------|-----------------------------------------------|------|-----------|--------|------------------------------|------------------------------------------|--|--|
|     |           |        |                                                                                                        | Spectral Counts |       |       |     |   |    |   |    | Localization     |           |          |                           |                                               |      |           |        |                              |                                          |  |  |
|     |           |        |                                                                                                        | Ex-             | Ex-   | Ex-   |     |   |    |   |    |                  |           |          |                           |                                               |      |           |        |                              |                                          |  |  |
|     |           |        |                                                                                                        | peri-           | peri- | peri- |     |   |    |   |    |                  |           |          |                           |                                               |      |           |        |                              |                                          |  |  |
|     |           |        |                                                                                                        | ment            | ment  | ment  |     |   |    |   |    |                  |           |          |                           |                                               |      |           |        |                              |                                          |  |  |
|     |           |        |                                                                                                        | 1               | 2     | 3     |     |   |    |   |    |                  |           |          |                           |                                               |      |           |        |                              |                                          |  |  |
|     |           |        |                                                                                                        | 1               | 2     | 3     | Sum |   |    |   |    |                  |           |          |                           |                                               |      |           |        |                              |                                          |  |  |
| No. | Accession | Gene   | Description                                                                                            | -               | +     | -     | +   | - | +  | - | +  | Enrichment Ratio | t-test    | MW [kDa] | Exclusively Intracellular | Exclusively Extracellular, Lysosomal, Luminal | Both | 6AzGlcNAc | GalNAz | Previous O-GlcNAc Proteomics | Previous Mucin Proteomics Identification |  |  |
| 30  | O35887    | CALU   | Calumenin GN=Calu PE=1 SV=1 - [CALU_MOUSE]                                                             | 0               | 10    | 0     | 8   | 0 | 11 | 0 | 29 | N/A              | 3.936E-04 | 37.0     |                           | ✓                                             |      |           |        | (23)                         | (16)(17)                                 |  |  |
| 31  | Q9DBR7    | MYPT1  | Protein phosphatase 1 regulatory subunit 12A GN=Ppp1r12a PE=1 SV=2 - [MYPT1_MOUSE]                     | 0               | 9     | 0     | 13  | 0 | 7  | 0 | 29 | N/A              | 5.397E-03 | 115      | ✓                         |                                               |      | ✓         | ✓      | (1)(5)(9)(19)(20)(26)        |                                          |  |  |
| 32  | Q5SUT0    | Q5SUT0 | Ewing sarcoma breakpoint region 1 GN=Ewsr1 PE=2 SV=1 - [Q5SUT0_MOUSE]                                  | 0               | 8     | 0     | 11  | 0 | 9  | 0 | 28 | N/A              | 4.511E-04 | 64.9     | ✓                         |                                               |      |           | ✓      | (9)(26)                      |                                          |  |  |
| 33  | Q3UMF0-4  | COBL1  | Isoform 4 of Cordon-bleu protein-like 1 GN=Cobl1 - [COBL1_MOUSE]                                       | 0               | 8     | 0     | 10  | 0 | 10 | 0 | 28 | N/A              | 1.510E-04 | 130      |                           |                                               |      | ✓         | ✓      |                              |                                          |  |  |
| 34  | A2A6U3    | A2A6U3 | Septin 9 GN=Sept9 PE=3 SV=1 - [A2A6U3_MOUSE]                                                           | 0               | 8     | 0     | 8   | 0 | 11 | 0 | 27 | N/A              | 8.438E-04 | 63.7     | ✓                         |                                               |      | ✓         |        | (26)                         |                                          |  |  |
| 35  | Q80ZX0    | Q80ZX0 | Protein Sec24b GN=Sec24b PE=2 SV=1 - [Q80ZX0_MOUSE]                                                    | 0               | 10    | 0     | 9   | 0 | 8  | 0 | 27 | N/A              | 9.888E-05 | 136      | ✓                         |                                               |      |           | ✓      | (2)                          |                                          |  |  |
| 36  | G3X972    | G3X972 | Protein Sec24c GN=Sec24c PE=4 SV=1 - [G3X972_MOUSE]                                                    | 0               | 7     | 0     | 11  | 0 | 9  | 0 | 27 | N/A              | 1.462E-03 | 119      | ✓                         |                                               |      | ✓         | ✓      | (2)                          |                                          |  |  |
| 37  | Q8CGF7    | TCRG1  | Transcription elongation regulator 1 GN=Tcerg1 PE=1 SV=2 - [TCRG1_MOUSE]                               | 0               | 9     | 0     | 9   | 0 | 9  | 0 | 27 | N/A              | 0.000E+00 | 124      | ✓                         |                                               |      |           | ✓      | (19)(23)                     |                                          |  |  |
| 38  | Q9CT10    | RANB3  | Ran-binding protein 3 GN=Ranbp3 PE=1 SV=2 - [RANB3_MOUSE]                                              | 0               | 9     | 0     | 9   | 0 | 9  | 0 | 27 | N/A              | 0.000E+00 | 52.5     | ✓                         |                                               |      | ✓         |        |                              |                                          |  |  |
| 39  | Q3UMF0-3  | COBL1  | Isoform 3 of Cordon-bleu protein-like 1 GN=Cobl1 - [COBL1_MOUSE]                                       | 0               | 8     | 0     | 9   | 0 | 10 | 0 | 27 | N/A              | 9.888E-05 | 129      | ✓                         |                                               |      | ✓         | ✓      |                              |                                          |  |  |
| 40  | E9Q4Q2    | E9Q4Q2 | Splicing factor 1 GN=Sf1 PE=4 SV=1 - [E9Q4Q2_MOUSE]                                                    | 0               | 10    | 0     | 7   | 0 | 10 | 0 | 27 | N/A              | 8.438E-04 | 59.7     | ✓                         |                                               |      |           | ✓      |                              |                                          |  |  |
| 41  | Q00519    | XDH    | Xanthine dehydrogenase/oxidase GN=Xdh PE=1 SV=5 - [XDH_MOUSE]                                          | 0               | 12    | 0     | 4   | 0 | 10 | 0 | 26 | N/A              | 2.265E-02 | 147      |                           |                                               | ✓    | ✓         |        | (9)(26)                      |                                          |  |  |
| 42  | Q60865    | CAPR1  | Caprin-1 GN=Caprin1 PE=1 SV=2 - [CAPR1_MOUSE]                                                          | 0               | 8     | 0     | 8   | 0 | 10 | 0 | 26 | N/A              | 2.020E-04 | 78.1     | ✓                         |                                               |      | ✓         | ✓      | (19)(23)(26)                 |                                          |  |  |
| 43  | E9Q3G8    | E9Q3G8 | Protein Nup153 GN=Nup153 PE=4 SV=1 - [E9Q3G8_MOUSE]                                                    | 0               | 8     | 0     | 8   | 0 | 9  | 0 | 25 | N/A              | 1.520E-05 | 152      | ✓                         |                                               |      |           | ✓      | (2)(12)(20)                  |                                          |  |  |
| 44  | Q7TQH0-2  | ATX2L  | Isoform 2 of Ataxin-2-like protein GN=Atxn2 - [ATX2L_MOUSE]                                            | 0               | 8     | 0     | 9   | 0 | 8  | 0 | 25 | N/A              | 1.520E-05 | 113      | ✓                         |                                               |      | ✓         | ✓      | (19)(23)                     |                                          |  |  |
| 45  | Q80U93    | NU214  | Nuclear pore complex protein Nup214 GN=Nup214 PE=1 SV=2 - [NU214_MOUSE]                                | 0               | 7     | 0     | 10  | 0 | 8  | 0 | 25 | N/A              | 6.996E-04 | 213      | ✓                         |                                               |      |           | ✓      | (1)(2)(19)(20)(23)(26)       |                                          |  |  |
| 46  | Q7M6Y3-6  | PICA   | Isoform 6 of Phosphatidylinositol-binding clathrin assembly protein GN=Picalm - [PICA_MOUSE]           | 0               | 4     | 0     | 8   | 0 | 12 | 0 | 24 | N/A              | 2.572E-02 | 70.5     | ✓                         |                                               |      |           | ✓      |                              | (17)                                     |  |  |
| 47  | Q6PFD9    | Q6PFD9 | Nucleoporin 98 GN=Nup98 PE=1 SV=1 - [Q6PFD9_MOUSE]                                                     | 0               | 8     | 0     | 11  | 0 | 5  | 0 | 24 | N/A              | 9.890E-03 | 125      | ✓                         |                                               |      |           | ✓      | (9)(20)                      |                                          |  |  |
| 48  | Q6PB44-2  | PTN23  | Isoform 2 of Tyrosine-protein phosphatase non-receptor type 23 GN=Ptpn23 - [PTN23_MOUSE]               | 0               | 10    | 0     | 7   | 0 | 7  | 0 | 24 | N/A              | 1.324E-03 | 185      | ✓                         |                                               |      |           | ✓      | (9)                          |                                          |  |  |
| 49  | Q99K48    | NONO   | Non-POU domain-containing octamer-binding protein GN=Nono PE=1 SV=3 - [NONO_MOUSE]                     | 0               | 5     | 0     | 9   | 0 | 10 | 0 | 24 | N/A              | 6.352E-03 | 54.5     | ✓                         |                                               |      | ✓         | ✓      | (19)(23)(24)(26)             |                                          |  |  |
| 50  | P10852    | 4F2    | 4F2 cell-surface antigen heavy chain GN=Slc3a2 PE=1 SV=1 - [4F2_MOUSE]                                 | 0               | 9     | 0     | 5   | 0 | 9  | 0 | 23 | N/A              | 4.535E-03 | 58.3     |                           |                                               | ✓    |           | ✓      |                              | (10)(17)                                 |  |  |
| 51  | Q9QXS6-3  | DREB   | Isoform E2 of Drebrin GN=Dbn1 - [DREB_MOUSE]                                                           | 0               | 9     | 0     | 5   | 0 | 9  | 0 | 23 | N/A              | 4.535E-03 | 72.4     | ✓                         |                                               |      | ✓         | ✓      | (9)(23)                      |                                          |  |  |
| 52  | O09106    | HDAC1  | Histone deacetylase 1 GN=Hdac1 PE=1 SV=1 - [HDAC1_MOUSE]                                               | 0               | 8     | 0     | 5   | 0 | 10 | 0 | 23 | N/A              | 6.185E-03 | 55.0     | ✓                         |                                               |      | ✓         |        | (9)(19)(23)                  |                                          |  |  |
| 53  | P98078    | DAB2   | Disabled homolog 2 GN=Dab2 PE=1 SV=2 - [DAB2_MOUSE]                                                    | 0               | 6     | 0     | 10  | 0 | 7  | 0 | 23 | N/A              | 3.098E-03 | 82.3     | ✓                         |                                               |      | ✓         | ✓      |                              |                                          |  |  |
| 54  | Q9WVG6-2  | CARM1  | Isoform 2 of Histone-arginine methyltransferase CARM1 GN=Carm1 - [CARM1_MOUSE]                         | 0               | 7     | 0     | 6   | 0 | 9  | 0 | 22 | N/A              | 1.143E-03 | 63.4     | ✓                         |                                               |      | ✓         | ✓      | (5)(19)(23)                  |                                          |  |  |
| 55  | Q8K310    | MATR3  | Matrin-3 GN=Matr3 PE=1 SV=1 - [MATR3_MOUSE]                                                            | 0               | 7     | 0     | 8   | 0 | 7  | 0 | 22 | N/A              | 2.526E-05 | 94.6     | ✓                         |                                               |      | ✓         | ✓      | (23)(26)                     |                                          |  |  |
| 56  | Q62418-3  | DBNL   | Isoform 3 of Drebrin-like protein GN=Dbn1 - [DBNL_MOUSE]                                               | 0               | 6     | 0     | 6   | 0 | 10 | 0 | 22 | N/A              | 5.328E-03 | 48.3     | ✓                         |                                               |      | ✓         | ✓      | (23)(26)                     |                                          |  |  |
| 57  | Q8BK67    | RCC2   | Protein RCC2 GN=Rcc2 PE=2 SV=1 - [RCC2_MOUSE]                                                          | 0               | 9     | 0     | 5   | 0 | 8  | 0 | 22 | N/A              | 3.650E-03 | 55.9     | ✓                         |                                               |      | ✓         |        | (23)                         |                                          |  |  |
| 58  | Q9JLM8    | DCLK1  | Serine/threonine-protein kinase DCLK1 GN=Dclk1 PE=1 SV=1 - [DCLK1_MOUSE]                               | 0               | 7     | 0     | 7   | 0 | 7  | 0 | 21 | N/A              | 0.000E+00 | 84.1     | ✓                         |                                               |      | ✓         |        | (5)(20)                      |                                          |  |  |
| 59  | Q8CH18    | CCAR1  | Cell division cycle and apoptosis regulator protein 1 GN=Ccar1 PE=1 SV=1 - [CCAR1_MOUSE]               | 0               | 8     | 0     | 8   | 0 | 5  | 0 | 21 | N/A              | 2.192E-03 | 132      | ✓                         |                                               |      |           | ✓      | (19)(23)                     |                                          |  |  |
| 60  | Q8R317-2  | UBQL1  | Isoform 2 of Ubiquilin-1 GN=Ubqln1 - [UBQL1_MOUSE]                                                     | 0               | 6     | 0     | 5   | 0 | 10 | 0 | 21 | N/A              | 1.016E-02 | 58.6     | ✓                         |                                               |      |           | ✓      |                              |                                          |  |  |
| 61  | Q8R317    | UBQL1  | Ubiquilin-1 GN=Ubqln1 PE=1 SV=1 - [UBQL1_MOUSE]                                                        | 0               | 6     | 0     | 5   | 0 | 10 | 0 | 21 | N/A              | 1.016E-02 | 61.9     | ✓                         |                                               |      |           | ✓      |                              |                                          |  |  |
| 62  | F6T2Z7    | F6T2Z7 | Protein Cald1 (Fragment) GN=Cald1 PE=4 SV=1 - [F6T2Z7_MOUSE]                                           | 0               | 6     | 0     | 6   | 0 | 9  | 0 | 21 | N/A              | 2.192E-03 | 41.4     | ✓                         |                                               |      | ✓         | ✓      |                              |                                          |  |  |
| 63  | P54728    | RD23B  | UV excision repair protein RAD23 homolog B GN=Rad23b PE=1 SV=2 - [RD23B_MOUSE]                         | 0               | 8     | 0     | 6   | 0 | 6  | 0 | 20 | N/A              | 5.620E-04 | 43.5     | ✓                         |                                               |      |           | ✓      | (5)(23)                      | (17)                                     |  |  |
| 64  | P45377    | ALD2   | Aldose reductase-related protein 2 GN=Akr1b8 PE=1 SV=2 - [ALD2_MOUSE]                                  | 0               | 6     | 0     | 4   | 0 | 10 | 0 | 20 | N/A              | 1.944E-02 | 36.1     | ✓                         |                                               |      | ✓         | ✓      | (9)(26)                      |                                          |  |  |
| 65  | Q8R050-2  | ERF3A  | Isoform 2 of Eukaryotic peptide chain release factor GTP-binding subunit ERF3A GN=Gsp1 - [ERF3A_MOUSE] | 0               | 7     | 0     | 6   | 0 | 7  | 0 | 20 | N/A              | 3.688E-05 | 68.5     | ✓                         |                                               |      | ✓         |        | (9)(23)(26)                  |                                          |  |  |
| 66  | P70372    | ELAV1  | ELAV-like protein 1 GN=Elavl1 PE=1 SV=2 - [ELAV1_MOUSE]                                                | 0               | 8     | 0     | 6   | 0 | 6  | 0 | 20 | N/A              | 5.620E-04 | 36.1     | ✓                         |                                               |      | ✓         |        | (9)(19)(26)                  |                                          |  |  |
| 67  | P51125-3  | ICAL   | Isoform 3 of Calpastatin GN=Cast - [ICAL_MOUSE]                                                        | 0               | 5     | 0     | 8   | 0 | 7  | 0 | 20 | N/A              | 1.641E-03 | 79.6     | ✓                         |                                               |      | ✓         |        | (26)                         |                                          |  |  |
| 68  | P51859    | HDGF   | Hepatoma-derived growth factor GN=Hdgf PE=1 SV=2 - [HDGF_MOUSE]                                        | 0               | 7     | 0     | 7   | 0 | 6  | 0 | 20 | N/A              | 3.688E-05 | 26.3     | ✓                         |                                               |      | ✓         | ✓      | (23)(26)                     |                                          |  |  |
| 69  | Q9DBG5    | PLIN3  | Perilipin-3 GN=Plin3 PE=1 SV=1 - [PLIN3_MOUSE]                                                         | 0               | 5     | 0     | 6   | 0 | 9  | 0 | 20 | N/A              | 5.167E-03 | 47.2     | ✓                         |                                               |      | ✓         | ✓      | (1)(9)(20)(23)               |                                          |  |  |



|     |           |        |                                                                                                          |   |   |   |   |   |   |   |   |   |    | GlcNAz                        |                      |                      |                                        |                                                               |      |               |             |                                                       |                                                        |      |  |  |  |  |  |  |  |
|-----|-----------|--------|----------------------------------------------------------------------------------------------------------|---|---|---|---|---|---|---|---|---|----|-------------------------------|----------------------|----------------------|----------------------------------------|---------------------------------------------------------------|------|---------------|-------------|-------------------------------------------------------|--------------------------------------------------------|------|--|--|--|--|--|--|--|
|     |           |        |                                                                                                          |   |   |   |   |   |   |   |   |   |    | Spectral Counts               |                      |                      |                                        |                                                               |      |               |             |                                                       |                                                        |      |  |  |  |  |  |  |  |
|     |           |        |                                                                                                          |   |   |   |   |   |   |   |   |   |    | Ex-<br>peri-<br>ment          | Ex-<br>peri-<br>ment | Ex-<br>peri-<br>ment | Sum                                    |                                                               |      |               |             |                                                       |                                                        |      |  |  |  |  |  |  |  |
|     |           |        |                                                                                                          |   |   |   |   |   |   |   |   |   |    | 1                             | 2                    | 3                    |                                        | Localization                                                  |      |               |             |                                                       |                                                        |      |  |  |  |  |  |  |  |
| No. | Accession | Gene   | Description                                                                                              | - | + | - | + | - | + | - | + | - | +  | En-<br>rich-<br>ment<br>Ratio | t-test               | MW<br>[kDa]          | Exclu-<br>sively<br>Intracellu-<br>lar | Exclusively<br>Extracellu-<br>lar, Lyso-<br>somal,<br>Luminal | Both | 6AzGI<br>cNAc | Gal-<br>NAz | Previous O-<br>GlcNAc<br>Proteomics<br>Identification | Previous<br>Mucin<br>Proteomics<br>Identifica-<br>tion |      |  |  |  |  |  |  |  |
| 70  | Q921F4    | HNRL   | Heterogeneous nuclear ribonucleoprotein L-like GN=Hnrpl PE=1 SV=3 - [HNRL_MOUSE]                         | 0 | 8 | 0 | 8 | 0 | 4 | 0 | 0 | 0 | 20 | N/A                           | 7.490E-03            | 64.1                 | ✓                                      |                                                               |      |               |             |                                                       |                                                        |      |  |  |  |  |  |  |  |
| 71  | Q7TQI3    | OTUB1  | Ubiquitin thioesterase OTUB1 GN=Otub1 PE=1 SV=2 - [OTUB1_MOUSE]                                          | 0 | 5 | 0 | 6 | 0 | 8 | 0 | 0 | 0 | 19 | N/A                           | 1.991E-03            | 31.3                 | ✓                                      |                                                               |      | ✓             |             |                                                       | (5)(9)(23)(26)                                         |      |  |  |  |  |  |  |  |
| 72  | Q05CL8    | LARP7  | La-related protein 7 GN=Larp7 PE=1 SV=2 - [LARP7_MOUSE]                                                  | 0 | 5 | 0 | 6 | 0 | 8 | 0 | 0 | 0 | 19 | N/A                           | 1.991E-03            | 64.8                 | ✓                                      |                                                               |      | ✓             |             |                                                       | (23)                                                   |      |  |  |  |  |  |  |  |
| 73  | G5E8E1    | G5E8E1 | Leucine rich repeat (In FliI) interacting protein 1, isoform CRA_e GN=Lrrfp1 PE=4 SV=1 - [G5E8E1_MOUSE]  | 0 | 5 | 0 | 6 | 0 | 8 | 0 | 0 | 0 | 19 | N/A                           | 1.991E-03            | 48.9                 | ✓                                      |                                                               |      | ✓             | ✓           |                                                       |                                                        |      |  |  |  |  |  |  |  |
| 74  | G3UWA6    | G3UWA6 | 4F2 cell-surface antigen heavy chain GN=Slc3a2 PE=4 SV=1 - [G3UWA6_MOUSE]                                | 0 | 7 | 0 | 4 | 0 | 7 | 0 | 0 | 0 | 18 | N/A                           | 3.883E-03            | 62.2                 |                                        |                                                               | ✓    |               | ✓           |                                                       |                                                        | (10) |  |  |  |  |  |  |  |
| 75  | Q8BYK6    | YTHD3  | YTH domain family protein 3 GN=Ythd3 PE=1 SV=2 - [YTHD3_MOUSE]                                           | 0 | 6 | 0 | 6 | 0 | 6 | 0 | 0 | 0 | 18 | N/A                           | 0.000E+00            | 63.9                 | ✓                                      |                                                               |      |               | ✓           |                                                       | (1)(19)(20)                                            |      |  |  |  |  |  |  |  |
| 76  | Q8C052    | MAP1S  | Microtubule-associated protein 1S GN=Map1s PE=1 SV=2 - [MAP1S_MOUSE]                                     | 0 | 6 | 0 | 6 | 0 | 5 | 0 | 0 | 0 | 17 | N/A                           | 7.021E-05            | 103                  | ✓                                      |                                                               |      | ✓             |             |                                                       | (9)(23)(26)                                            |      |  |  |  |  |  |  |  |
| 77  | A2AMW0    | A2AMW0 | Capping protein (Actin filament) muscle Z-line, beta GN=Capzb PE=4 SV=1 - [A2AMW0_MOUSE]                 | 0 | 6 | 0 | 7 | 0 | 4 | 0 | 0 | 0 | 17 | N/A                           | 3.016E-03            | 29.3                 | ✓                                      |                                                               |      | ✓             |             |                                                       | (5)(26)                                                |      |  |  |  |  |  |  |  |
| 78  | Q64012-2  | RALY   | Isoform 1 of RNA-binding protein Raly GN=Raly - [RALY_MOUSE]                                             | 0 | 7 | 0 | 3 | 0 | 7 | 0 | 0 | 0 | 17 | N/A                           | 1.316E-02            | 31.2                 | ✓                                      |                                                               |      | ✓             |             |                                                       |                                                        |      |  |  |  |  |  |  |  |
| 79  | Q60967    | PAPS1  | Bifunctional 3'-phosphoadenosine 5'-phosphosulfate synthase 1 GN=Paps1 PE=2 SV=1 - [PAPS1_MOUSE]         | 0 | 7 | 0 | 4 | 0 | 6 | 0 | 0 | 0 | 17 | N/A                           | 3.016E-03            | 70.7                 | ✓                                      |                                                               |      | ✓             |             |                                                       |                                                        |      |  |  |  |  |  |  |  |
| 80  | O08529    | CAN2   | Calpain-2 catalytic subunit GN=Capn2 PE=2 SV=4 - [CAN2_MOUSE]                                            | 0 | 8 | 0 | 3 | 0 | 6 | 0 | 0 | 0 | 17 | N/A                           | 1.754E-02            | 79.8                 | ✓                                      |                                                               |      | ✓             |             |                                                       |                                                        |      |  |  |  |  |  |  |  |
| 81  | Q9Z1D1    | EIF3G  | Eukaryotic translation initiation factor 3 subunit G GN=EIF3g PE=1 SV=2 - [EIF3G_MOUSE]                  | 0 | 6 | 0 | 7 | 0 | 3 | 0 | 0 | 0 | 16 | N/A                           | 1.135E-02            | 35.6                 | ✓                                      |                                                               |      | ✓             | ✓           |                                                       | (9)(19)(23)(26)                                        |      |  |  |  |  |  |  |  |
| 82  | Q60737    | CSK21  | Casein kinase II subunit alpha GN=Csk2a1 PE=1 SV=2 - [CSK21_MOUSE]                                       | 0 | 7 | 0 | 5 | 0 | 4 | 0 | 0 | 0 | 16 | N/A                           | 3.772E-03            | 45.1                 | ✓                                      |                                                               |      |               | ✓           |                                                       | (5)                                                    |      |  |  |  |  |  |  |  |
| 83  | P31230    | AIMP1  | Aminoacyl tRNA synthase complex-interacting multifunctional protein 1 GN=Aimp1 PE=1 SV=2 - [AIMP1_MOUSE] | 0 | 6 | 0 | 4 | 0 | 5 | 0 | 0 | 0 | 16 | N/A                           | 8.922E-05            | 34.0                 |                                        |                                                               | ✓    | ✓             | ✓           |                                                       | (1)                                                    |      |  |  |  |  |  |  |  |
| 84  | Q8K3Z9    | PO121  | Nuclear envelope pore membrane protein POM 121 GN=Pom121 PE=1 SV=2 - [PO121_MOUSE]                       | 0 | 5 | 0 | 5 | 0 | 6 | 0 | 0 | 0 | 16 | N/A                           | 8.922E-05            | 121                  | ✓                                      |                                                               |      |               | ✓           |                                                       | (1)                                                    |      |  |  |  |  |  |  |  |
| 85  | P19096    | FAS    | Fatty acid synthase GN=Fasn PE=1 SV=2 - [FAS_MOUSE]                                                      | 0 | 4 | 0 | 6 | 0 | 5 | 0 | 0 | 0 | 15 | N/A                           | 9.781E-04            | 272                  | ✓                                      |                                                               |      | ✓             |             |                                                       | (5)(8)(9)(23)                                          |      |  |  |  |  |  |  |  |
| 86  | P23198    | CBX3   | Chromobox protein homolog 3 GN=Cbx3 PE=1 SV=2 - [CBX3_MOUSE]                                             | 0 | 5 | 0 | 4 | 0 | 6 | 0 | 0 | 0 | 15 | N/A                           | 9.781E-04            | 20.8                 | ✓                                      |                                                               |      | ✓             |             |                                                       | (23)(26)                                               |      |  |  |  |  |  |  |  |
| 87  | Q64337    | SQSTM1 | Sequestosome-1 GN=Sqstm1 PE=1 SV=1 - [SQSTM1_MOUSE]                                                      | 0 | 4 | 0 | 5 | 0 | 6 | 0 | 0 | 0 | 15 | N/A                           | 9.781E-04            | 48.1                 | ✓                                      |                                                               |      | ✓             |             |                                                       | (23)                                                   |      |  |  |  |  |  |  |  |
| 88  | Q8C7R4    | UBA6   | Ubiquitin-like modifier-activating enzyme 6 GN=Uba6 PE=1 SV=1 - [UBA6_MOUSE]                             | 0 | 3 | 0 | 4 | 0 | 8 | 0 | 0 | 0 | 15 | N/A                           | 3.069E-02            | 118                  | ✓                                      |                                                               |      | ✓             |             |                                                       | (23)                                                   |      |  |  |  |  |  |  |  |
| 89  | Q3THS6    | METK2  | S-adenosylmethionine synthase isoform type-2 GN=Mat2a PE=2 SV=2 - [METK2_MOUSE]                          | 0 | 4 | 0 | 4 | 0 | 7 | 0 | 0 | 0 | 15 | N/A                           | 7.490E-03            | 43.7                 | ✓                                      |                                                               |      | ✓             |             |                                                       | (20)                                                   |      |  |  |  |  |  |  |  |
| 90  | Q6PHZ2-2  | KCC2D  | Isoform 2 of Calcium/calmodulin-dependent protein kinase type II subunit delta GN=Camk2d - [KCC2D_MOUSE] | 0 | 6 | 0 | 4 | 0 | 5 | 0 | 0 | 0 | 15 | N/A                           | 9.781E-04            | 54.1                 | ✓                                      |                                                               |      | ✓             |             |                                                       |                                                        |      |  |  |  |  |  |  |  |
| 91  | P47930    | FOSL2  | Fos-related antigen 2 GN=Fosl2 PE=2 SV=2 - [FOSL2_MOUSE]                                                 | 0 | 5 | 0 | 6 | 0 | 4 | 0 | 0 | 0 | 15 | N/A                           | 9.781E-04            | 35.3                 | ✓                                      |                                                               |      |               | ✓           |                                                       |                                                        |      |  |  |  |  |  |  |  |
| 92  | J3QNB1    | J3QNB1 | La-related protein 1 GN=Larp1 PE=4 SV=1 - [J3QNB1_MOUSE]                                                 | 0 | 7 | 0 | 3 | 0 | 5 | 0 | 0 | 0 | 15 | N/A                           | 1.235E-02            | 121                  | ✓                                      |                                                               |      | ✓             |             |                                                       |                                                        |      |  |  |  |  |  |  |  |
| 93  | Q9JLV1    | BAG3   | BAG family molecular chaperone regulator 3 GN=Bag3 PE=1 SV=2 - [BAG3_MOUSE]                              | 0 | 4 | 0 | 5 | 0 | 5 | 0 | 0 | 0 | 14 | N/A                           | 1.510E-04            | 61.8                 | ✓                                      |                                                               |      | ✓             | ✓           |                                                       | (23)(26)                                               | (17) |  |  |  |  |  |  |  |
| 94  | Q9R0P5    | DEST   | Dextrin GN=Dstn PE=1 SV=3 - [DEST_MOUSE]                                                                 | 0 | 4 | 0 | 4 | 0 | 6 | 0 | 0 | 0 | 14 | N/A                           | 2.192E-03            | 18.5                 | ✓                                      |                                                               |      | ✓             | ✓           |                                                       | (9)(26)                                                |      |  |  |  |  |  |  |  |
| 95  | P59326    | YTHD1  | YTH domain family protein 1 GN=Ythd1 PE=2 SV=1 - [YTHD1_MOUSE]                                           | 0 | 4 | 0 | 5 | 0 | 5 | 0 | 0 | 0 | 14 | N/A                           | 1.510E-04            | 60.8                 | ✓                                      |                                                               |      |               | ✓           |                                                       | (9)(19)                                                |      |  |  |  |  |  |  |  |
| 96  | Q3TN34    | JRAB   | GN=Mical2 PE=2 SV=1 - [Q3TN34_MOUSE]                                                                     | 0 | 4 | 0 | 7 | 0 | 3 | 0 | 0 | 0 | 14 | N/A                           | 1.780E-02            | 108                  | ✓                                      |                                                               |      |               | ✓           |                                                       | (26)                                                   |      |  |  |  |  |  |  |  |
| 97  | Q8BI72    | CARF   | CDKN2A-interacting protein GN=Cdkn2aip PE=2 SV=1 - [CARF_MOUSE]                                          | 0 | 4 | 0 | 4 | 0 | 6 | 0 | 0 | 0 | 14 | N/A                           | 2.192E-03            | 59.7                 | ✓                                      |                                                               |      | ✓             |             |                                                       | (23)                                                   |      |  |  |  |  |  |  |  |
| 98  | Q8K354    | CBR3   | Carbonyl reductase [NADPH] 3 GN=Cbr3 PE=2 SV=1 - [CBR3_MOUSE]                                            | 0 | 4 | 0 | 4 | 0 | 6 | 0 | 0 | 0 | 14 | N/A                           | 2.192E-03            | 30.9                 | ✓                                      |                                                               |      | ✓             |             |                                                       |                                                        |      |  |  |  |  |  |  |  |
| 99  | Q9WV55    | VAPA   | Vesicle-associated membrane protein-associated protein A GN=Vapa PE=1 SV=2 - [VAPA_MOUSE]                | 0 | 4 | 0 | 3 | 0 | 6 | 0 | 0 | 0 | 13 | N/A                           | 7.966E-03            | 27.8                 |                                        |                                                               | ✓    |               |             |                                                       | (9)(26)                                                |      |  |  |  |  |  |  |  |
| 100 | Q99JF8    | PSIP1  | PC4 and SFRS1-interacting protein GN=Psip1 PE=1 SV=1 - [PSIP1_MOUSE]                                     | 0 | 4 | 0 | 5 | 0 | 4 | 0 | 0 | 0 | 13 | N/A                           | 2.020E-04            | 59.7                 | ✓                                      |                                                               |      |               |             |                                                       | (9)(23)                                                |      |  |  |  |  |  |  |  |
| 101 | Q8BVY0    | Q8BVY0 | Protein Rsl1d1 GN=Rsl1d1 PE=2 SV=1 - [Q8BVY0_MOUSE]                                                      | 0 | 3 | 0 | 3 | 0 | 7 | 0 | 0 | 0 | 13 | N/A                           | 3.138E-02            | 50.4                 | ✓                                      |                                                               |      | ✓             |             |                                                       | (9)                                                    |      |  |  |  |  |  |  |  |
| 102 | B7ZCP4    | B7ZCP4 | Copine I GN=Cpne1 PE=4 SV=1 - [B7ZCP4_MOUSE]                                                             | 0 | 5 | 0 | 4 | 0 | 4 | 0 | 0 | 0 | 13 | N/A                           | 2.020E-04            | 52.8                 | ✓                                      |                                                               |      | ✓             |             |                                                       | (9)                                                    |      |  |  |  |  |  |  |  |
| 103 | P68037    | UB2L3  | Ubiquitin-conjugating enzyme E2 L3 GN=Ube2l3 PE=2 SV=1 - [UB2L3_MOUSE]                                   | 0 | 5 | 0 | 3 | 0 | 5 | 0 | 0 | 0 | 13 | N/A                           | 2.890E-03            | 17.9                 | ✓                                      |                                                               |      | ✓             |             |                                                       | (26)                                                   |      |  |  |  |  |  |  |  |
| 104 | Q61081    | CDC37  | Hsp90 co-chaperone Cdc37 GN=Cdc37 PE=2 SV=1 - [CDC37_MOUSE]                                              | 0 | 6 | 0 | 3 | 0 | 4 | 0 | 0 | 0 | 13 | N/A                           | 7.966E-03            | 44.6                 | ✓                                      |                                                               |      | ✓             |             |                                                       | (23)(26)                                               |      |  |  |  |  |  |  |  |
| 105 | Q80YR5    | SAFB2  | Scaffold attachment factor B2 GN=Safb2 PE=1 SV=2 - [SAFB2_MOUSE]                                         | 0 | 5 | 0 | 3 | 0 | 5 | 0 | 0 | 0 | 13 | N/A                           | 2.890E-03            | 112                  | ✓                                      |                                                               |      | ✓             |             |                                                       | (23)                                                   |      |  |  |  |  |  |  |  |
| 106 | Q60710    | SAMH1  | SAM domain and HD domain-containing protein 1 GN=Samhd1 PE=1 SV=2 - [SAMH1_MOUSE]                        | 0 | 4 | 0 | 4 | 0 | 5 | 0 | 0 | 0 | 13 | N/A                           | 2.020E-04            | 72.6                 | ✓                                      |                                                               |      | ✓             | ✓           |                                                       | (23)                                                   |      |  |  |  |  |  |  |  |
| 107 | Q91W50    | CSDE1  | Cold shock domain-containing protein E1 GN=Csde1 PE=2 SV=1 - [CSDE1_MOUSE]                               | 0 | 4 | 0 | 4 | 0 | 5 | 0 | 0 | 0 | 13 | N/A                           | 2.020E-04            | 88.7                 | ✓                                      |                                                               |      | ✓             |             |                                                       | (19)(23)                                               |      |  |  |  |  |  |  |  |
| 108 | Q8R1X6    | SPG20  | Spartin GN=Spg20 PE=2 SV=1 - [SPG20_MOUSE]                                                               | 0 | 6 | 0 | 3 | 0 | 4 | 0 | 0 | 0 | 13 | N/A                           | 7.966E-03            | 72.6                 | ✓                                      |                                                               |      | ✓             |             |                                                       | (1)(9)(20)                                             |      |  |  |  |  |  |  |  |
| 109 | Q921K2    | Q921K2 | Poly (ADP-ribose) polymerase family, member 1 GN=Parp1 PE=2 SV=1 - [Q921K2_MOUSE]                        | 0 | 4 | 0 | 4 | 0 | 5 | 0 | 0 | 0 | 13 | N/A                           | 2.020E-04            | 113                  | ✓                                      |                                                               |      | ✓             |             |                                                       |                                                        |      |  |  |  |  |  |  |  |
| 110 | Q6NZD2    | Q6NZD2 | Sorting nexin 1 GN=Snx1 PE=2 SV=1 - [Q6NZD2_MOUSE]                                                       | 0 | 5 | 0 | 4 | 0 | 4 | 0 | 0 | 0 | 13 | N/A                           | 2.020E-04            | 58.8                 | ✓                                      |                                                               |      | ✓             | ✓           |                                                       |                                                        |      |  |  |  |  |  |  |  |
| 111 | O89110    | CASP8  | Caspase-8 GN=Casp8 PE=1 SV=1 - [CASP8_MOUSE]                                                             | 0 | 3 | 0 | 5 | 0 | 5 | 0 | 0 | 0 | 13 | N/A                           | 2.890E-03            | 55.3                 | ✓                                      |                                                               |      | ✓             |             |                                                       |                                                        |      |  |  |  |  |  |  |  |

| No. | Accession | Gene   | Description                                                                                                | GlcNAz          |   |               |   |               |   |     |    |     |           | Enrichment Ratio | t-test | MW [kDa] | Localization              |                                               |      |                 |        | Previous O-GlcNAc Proteomics Identification | Previous Mucin Proteomics Identification |
|-----|-----------|--------|------------------------------------------------------------------------------------------------------------|-----------------|---|---------------|---|---------------|---|-----|----|-----|-----------|------------------|--------|----------|---------------------------|-----------------------------------------------|------|-----------------|--------|---------------------------------------------|------------------------------------------|
|     |           |        |                                                                                                            | Spectral Counts |   |               |   |               |   |     |    |     |           |                  |        |          | Exclusively Intracellular | Exclusively Extracellular, Lysosomal, Luminal | Both | 6AzGlcNAc       | GalNAz |                                             |                                          |
|     |           |        |                                                                                                            | Ex-periment 1   |   | Ex-periment 2 |   | Ex-periment 3 |   | Sum |    |     |           |                  |        |          |                           |                                               |      |                 |        |                                             |                                          |
|     |           |        |                                                                                                            | -               | + | -             | + | -             | + |     | -  | +   |           |                  |        |          |                           |                                               |      |                 |        |                                             |                                          |
| 112 | D3YXK2    | SAFB1  | Scaffold attachment factor B1 GN=Safb PE=1 SV=2 - [SAFB1_MOUSE]                                            | 0               | 6 | 0             | 3 | 0             | 4 | 0   | 13 | N/A | 7.966E-03 | 105              | ✓      |          |                           | ✓                                             | ✓    |                 |        |                                             |                                          |
| 113 | O70310    | NMT1   | Glycylpeptide N-tetradecanoyltransferase 1 GN=Nmt1 PE=1 SV=1 - [NMT1_MOUSE]                                | 0               | 6 | 0             | 4 | 0             | 2 | 0   | 12 | N/A | 2.572E-02 | 56.9             | ✓      |          |                           | ✓                                             |      | (23)            | (17)   |                                             |                                          |
| 114 | P49586    | PCY1A  | Choline-phosphate cytidyltransferase A GN=Pcyt1a PE=1 SV=1 - [PCY1A_MOUSE]                                 | 0               | 3 | 0             | 5 | 0             | 4 | 0   | 12 | N/A | 2.278E-03 | 41.6             | ✓      |          |                           | ✓                                             |      | (23)            |        |                                             |                                          |
| 115 | Q6NXL1    | Q6NXL1 | Protein Sec24d GN=Sec24d PE=2 SV=1 - [Q6NXL1_MOUSE]                                                        | 0               | 2 | 0             | 5 | 0             | 5 | 0   | 12 | N/A | 1.613E-02 | 113              | ✓      |          |                           |                                               | ✓    | (2)             |        |                                             |                                          |
| 116 | P01899    | HA11   | H-2 class I histocompatibility antigen, D-B alpha chain GN=H2-D1 PE=1 SV=2 - [HA11_MOUSE]                  | 0               | 4 | 0             | 4 | 0             | 4 | 0   | 12 | N/A | 0.000E+00 | 40.8             |        |          | ✓                         |                                               | ✓    |                 |        |                                             |                                          |
| 117 | P01897    | HA1L   | H-2 class I histocompatibility antigen, L-D alpha chain GN=H2-L PE=1 SV=2 - [HA1L_MOUSE]                   | 0               | 4 | 0             | 4 | 0             | 4 | 0   | 12 | N/A | 0.000E+00 | 40.7             |        |          | ✓                         |                                               | ✓    |                 |        |                                             |                                          |
| 118 | Q99K51    | PLST   | Plastin-3 GN=Pls3 PE=1 SV=3 - [PLST_MOUSE]                                                                 | 0               | 2 | 0             | 5 | 0             | 5 | 0   | 12 | N/A | 1.613E-02 | 70.7             | ✓      |          |                           | ✓                                             |      |                 |        |                                             |                                          |
| 119 | Q62426    | CYTB   | Cystatin-B GN=Cstb PE=1 SV=1 - [CYTB_MOUSE]                                                                | 0               | 4 | 0             | 5 | 0             | 3 | 0   | 12 | N/A | 2.278E-03 | 11.0             | ✓      |          |                           | ✓                                             |      |                 |        |                                             |                                          |
| 120 | Q9CXW3    | CYBP   | Calcyclin-binding protein GN=Cacybp PE=1 SV=1 - [CYBP_MOUSE]                                               | 0               | 4 | 0             | 4 | 0             | 3 | 0   | 11 | N/A | 3.882E-04 | 26.5             | ✓      |          |                           | ✓                                             |      | (9)(26)         |        |                                             |                                          |
| 121 | Q9WTK5    | NFKB2  | Nuclear factor NF-kappa-B p100 subunit GN=Nfkb2 PE=1 SV=1 - [NFKB2_MOUSE]                                  | 0               | 3 | 0             | 4 | 0             | 4 | 0   | 11 | N/A | 3.882E-04 | 96.8             | ✓      |          |                           | ✓                                             | ✓    | (9)(23)(26)     |        |                                             |                                          |
| 122 | O70305-2  | ATX2   | Isoform 2 of Ataxin-2 GN=Atxn2 - [ATX2_MOUSE]                                                              | 0               | 3 | 0             | 3 | 0             | 5 | 0   | 11 | N/A | 5.328E-03 | 129              | ✓      |          |                           | ✓                                             | ✓    | (9)             |        |                                             |                                          |
| 123 | O55137    | ACOT1  | Acyl-coenzyme A thioesterase 1 GN=Acot1 PE=1 SV=1 - [ACOT1_MOUSE]                                          | 0               | 4 | 0             | 3 | 0             | 4 | 0   | 11 | N/A | 3.882E-04 | 46.1             | ✓      |          |                           | ✓                                             |      | (9)             |        |                                             |                                          |
| 124 | A2AVJ7    | A2AVJ7 | Ribosome binding protein 1 GN=Rrbp1 PE=4 SV=1 - [A2AVJ7_MOUSE]                                             | 0               | 2 | 0             | 4 | 0             | 5 | 0   | 11 | N/A | 1.417E-02 | 158              | ✓      |          |                           | ✓                                             | ✓    | (9)             |        |                                             |                                          |
| 125 | P83741-4  | WNK1   | Isoform 4 of Serine/threonine-protein kinase WNK1 GN=Wnk1 - [WNK1_MOUSE]                                   | 0               | 2 | 0             | 5 | 0             | 4 | 0   | 11 | N/A | 1.417E-02 | 225              | ✓      |          |                           |                                               | ✓    | (5)(13)(19)(23) |        |                                             |                                          |
| 126 | Q76MZ3    | 2AAA   | Serine/threonine-protein phosphatase 2A 65 kDa regulatory subunit A alpha isoform GN=Ppp2r1a               | 0               | 4 | 0             | 3 | 0             | 4 | 0   | 11 | N/A | 3.882E-04 | 65.3             | ✓      |          |                           | ✓                                             |      | (4)(9)(14)      |        |                                             |                                          |
| 127 | Q08093    | CNN2   | Calponin-2 GN=Cnn2 PE=2 SV=1 - [CNN2_MOUSE]                                                                | 0               | 4 | 0             | 3 | 0             | 4 | 0   | 11 | N/A | 3.882E-04 | 33.1             | ✓      |          |                           | ✓                                             | ✓    | (23)(26)        |        |                                             |                                          |
| 128 | P70288    | HDAC2  | Histone deacetylase 2 GN=Hdac2 PE=1 SV=1 - [HDAC2_MOUSE]                                                   | 0               | 5 | 0             | 3 | 0             | 3 | 0   | 11 | N/A | 5.328E-03 | 55.3             | ✓      |          |                           | ✓                                             |      | (23)            |        |                                             |                                          |
| 129 | O70551    | SRPK1  | SRSF protein kinase 1 GN=Srpk1 PE=1 SV=2 - [SRPK1_MOUSE]                                                   | 0               | 4 | 0             | 4 | 0             | 3 | 0   | 11 | N/A | 3.882E-04 | 73.0             | ✓      |          |                           | ✓                                             |      | (23)            |        |                                             |                                          |
| 130 | P32921-2  | SYWC   | Isoform 2 of Tryptophan--tRNA ligase, cytoplasmic GN=Wars - [SYWC_MOUSE]                                   | 0               | 4 | 0             | 2 | 0             | 5 | 0   | 11 | N/A | 1.417E-02 | 53.6             | ✓      |          |                           | ✓                                             |      | (14)(23)        |        |                                             |                                          |
| 131 | Q9Z1A1    | Q9Z1A1 | Protein Tfg GN=Tfg PE=2 SV=1 - [Q9Z1A1_MOUSE]                                                              | 0               | 4 | 0             | 4 | 0             | 3 | 0   | 11 | N/A | 3.882E-04 | 43.0             | ✓      |          |                           |                                               | ✓    |                 |        |                                             |                                          |
| 132 | G3X9V0    | G3X9V0 | MCG22048, isoform CRA_a GN=Psm2 PE=4 SV=1 - [G3X9V0_MOUSE]                                                 | 0               | 3 | 0             | 3 | 0             | 5 | 0   | 11 | N/A | 5.328E-03 | 26.1             | ✓      |          |                           | ✓                                             |      |                 |        |                                             |                                          |
| 133 | F6TQN9    | F6TQN9 | Disabled homolog 2 (Fragment) GN=Dab2 PE=4 SV=1 - [F6TQN9_MOUSE]                                           | 0               | 3 | 0             | 5 | 0             | 3 | 0   | 11 | N/A | 5.328E-03 | 67.8             | ✓      |          |                           |                                               | ✓    |                 |        |                                             |                                          |
| 134 | E9Q7W0    | E9Q7W0 | Recombining-binding protein suppressor of hairless GN=Rbpj PE=4 SV=1 - [E9Q7W0_MOUSE]                      | 0               | 4 | 0             | 3 | 0             | 4 | 0   | 11 | N/A | 3.882E-04 | 54.3             | ✓      |          |                           |                                               | ✓    |                 |        |                                             |                                          |
| 135 | E9Q7G0    | E9Q7G0 | Protein Numa1 GN=Numa1 PE=4 SV=1 - [E9Q7G0_MOUSE]                                                          | 0               | 3 | 0             | 5 | 0             | 3 | 0   | 11 | N/A | 5.328E-03 | 236              | ✓      |          |                           | ✓                                             |      |                 |        |                                             |                                          |
| 136 | Q8C156    | CND2   | Condensin complex subunit 2 GN=Ncaph PE=2 SV=1 - [CND2_MOUSE]                                              | 0               | 3 | 0             | 3 | 0             | 4 | 0   | 10 | N/A | 5.620E-04 | 82.3             | ✓      |          |                           | ✓                                             |      | (9)(23)         |        |                                             |                                          |
| 137 | Q99NB8    | UBQL4  | Ubiquilin-4 GN=Ubqln4 PE=1 SV=1 - [UBQL4_MOUSE]                                                            | 0               | 2 | 0             | 3 | 0             | 5 | 0   | 10 | N/A | 1.944E-02 | 63.5             | ✓      |          |                           | ✓                                             | ✓    | (9)             |        |                                             |                                          |
| 138 | G3X8Q0    | G3X8Q0 | Trans-acting transcription factor 1 GN=Sp1 PE=4 SV=1 - [G3X8Q0_MOUSE]                                      | 0               | 4 | 0             | 3 | 0             | 3 | 0   | 10 | N/A | 5.620E-04 | 80.4             | ✓      |          |                           |                                               | ✓    | (9)             |        |                                             |                                          |
| 139 | Q9D5T0    | ATAD1  | ATPase family AAA domain-containing protein 1 GN=Atad1 PE=1 SV=1 - [ATAD1_MOUSE]                           | 0               | 3 | 0             | 4 | 0             | 3 | 0   | 10 | N/A | 5.620E-04 | 40.7             | ✓      |          |                           | ✓                                             |      | (23)            |        |                                             |                                          |
| 140 | Q91Z38    | TTC1   | Tetratricopeptide repeat protein 1 GN=Ttc1 PE=2 SV=1 - [TTC1_MOUSE]                                        | 0               | 2 | 0             | 3 | 0             | 5 | 0   | 10 | N/A | 1.944E-02 | 33.2             | ✓      |          |                           | ✓                                             |      | (23)            |        |                                             |                                          |
| 141 | Q8BTI8-3  | SRRM2  | Isoform 3 of Serine/arginine repetitive matrix protein 2 GN=Srrm2 - [SRRM2_MOUSE]                          | 0               | 2 | 0             | 5 | 0             | 3 | 0   | 10 | N/A | 1.944E-02 | 285              | ✓      |          |                           | ✓                                             |      | (23)            |        |                                             |                                          |
| 142 | Q8BJU0-2  | SGTA   | Isoform 2 of Small glutamine-rich tetratricopeptide repeat-containing protein alpha GN=Sgta - [SGTA_MOUSE] | 0               | 3 | 0             | 3 | 0             | 4 | 0   | 10 | N/A | 5.620E-04 | 34.2             | ✓      |          |                           |                                               |      | (23)            |        |                                             |                                          |
| 143 | Q8CFQ9    | Q8CFQ9 | Fusion, derived from t(12;16) malignant liposarcoma (Human) GN=Fus PE=2 SV=1 - [Q8CFQ9_MOUSE]              | 0               | 3 | 0             | 3 | 0             | 4 | 0   | 10 | N/A | 5.620E-04 | 52.6             | ✓      |          |                           |                                               | ✓    |                 |        |                                             |                                          |
| 144 | P54729    | NUB1   | NEDD8 ultimate buster 1 GN=Nub1 PE=1 SV=2 - [NUB1_MOUSE]                                                   | 0               | 4 | 0             | 4 | 0             | 2 | 0   | 10 | N/A | 7.490E-03 | 70.3             | ✓      |          |                           |                                               |      |                 |        |                                             |                                          |
| 145 | O70494-2  | SP3    | Isoform 2 of Transcription factor Sp3 GN=Sp3 - [SP3_MOUSE]                                                 | 0               | 3 | 0             | 3 | 0             | 4 | 0   | 10 | N/A | 5.620E-04 | 78.3             | ✓      |          |                           |                                               | ✓    |                 |        |                                             |                                          |
| 146 | E9Q066    | E9Q066 | La-related protein 4 GN=Larp4 PE=4 SV=1 - [E9Q066_MOUSE]                                                   | 0               | 3 | 0             | 3 | 0             | 4 | 0   | 10 | N/A | 5.620E-04 | 79.6             | ✓      |          |                           | ✓                                             |      |                 |        |                                             |                                          |
| 147 | P61222    | ABCE1  | ATP-binding cassette sub-family E member 1 GN=Abce1 PE=2 SV=1 - [ABCE1_MOUSE]                              | 0               | 2 | 0             | 3 | 0             | 4 | 0   | 9  | N/A | 6.533E-03 | 67.3             | ✓      |          |                           |                                               |      | (9)(23)(26)     |        |                                             |                                          |
| 148 | Q5UE59    | Q5UE59 | Kinesin light chain 1 GN=Klc1 PE=2 SV=1 - [Q5UE59_MOUSE]                                                   | 0               | 2 | 0             | 3 | 0             | 4 | 0   | 9  | N/A | 6.533E-03 | 61.6             | ✓      |          |                           | ✓                                             |      | (9)             |        |                                             |                                          |
| 149 | Q7TSJ2-3  | MAP6   | Isoform 3 of Microtubule-associated protein 6 GN=Map6 - [MAP6_MOUSE]                                       | 0               | 3 | 0             | 3 | 0             | 3 | 0   | 9  | N/A | 0.000E+00 | 32.8             | ✓      |          |                           | ✓                                             | ✓    | (5)             |        |                                             |                                          |
| 150 | Q924B0    | Q924B0 | Inositol (Myo)-1(Or 4)-monophosphatase 1 GN=Impa1 PE=2 SV=1 - [Q924B0_MOUSE]                               | 0               | 3 | 0             | 2 | 0             | 4 | 0   | 9  | N/A | 6.533E-03 | 30.4             | ✓      |          |                           |                                               |      | (26)            |        |                                             |                                          |
| 151 | Q6PDL0    | DC1L2  | Cytoplasmic dynein 1 light intermediate chain 2 GN=Dync1li2 PE=1 SV=2 - [DC1L2_MOUSE]                      | 0               | 5 | 0             | 2 | 0             | 2 | 0   | 9  | N/A | 3.994E-02 | 54.2             | ✓      |          |                           |                                               |      | (23)            |        |                                             |                                          |
| 152 | P04095    | PR2C2  | Prolactin-2C2 GN=Pr2c2 PE=1 SV=1 - [PR2C2_MOUSE]                                                           | 0               | 5 | 0             | 2 | 0             | 2 | 0   | 9  | N/A | 3.994E-02 | 25.4             |        |          | ✓                         |                                               | ✓    |                 |        |                                             |                                          |
| 153 | Q9WU78    | PDC61  | Programmed cell death 6-interacting protein GN=Pdc61p PE=1 SV=3 - [PDC61_MOUSE]                            | 0               | 2 | 0             | 3 | 0             | 4 | 0   | 9  | N/A | 6.533E-03 | 96.0             | ✓      |          |                           | ✓                                             | ✓    |                 |        |                                             |                                          |

| No  | Accession | Gene   | Description                                                                                          | GlcNAz Spectral Counts |   |               |   |               |   |     |   |                           |                                               | Enrichment Ratio | t-test | MW [kDa] | Localization |           |        |             |      | Previous O-GlcNAc Proteomics | Previous Mucin Proteomics Identification |
|-----|-----------|--------|------------------------------------------------------------------------------------------------------|------------------------|---|---------------|---|---------------|---|-----|---|---------------------------|-----------------------------------------------|------------------|--------|----------|--------------|-----------|--------|-------------|------|------------------------------|------------------------------------------|
|     |           |        |                                                                                                      | Ex-periment 1          |   | Ex-periment 2 |   | Ex-periment 3 |   | Sum |   | Exclusively Intracellular | Exclusively Extracellular, Lysosomal, Luminal |                  |        |          | Both         | 6AzGlcNAc | GalNAz |             |      |                              |                                          |
|     |           |        |                                                                                                      | -                      | + | -             | + | -             | + | -   | + |                           |                                               |                  |        |          |              |           |        |             |      |                              |                                          |
|     |           |        |                                                                                                      | -                      | + | -             | + | -             | + | -   | + |                           |                                               |                  |        |          |              |           |        |             |      |                              |                                          |
| 154 | Q9R0X4    | ACOT9  | Acyl-coenzyme A thioesterase 9, mitochondrial GN=Acot9 PE=1 SV=1 - [ACOT9_MOUSE]                     | 0                      | 3 | 0             | 3 | 0             | 3 | 0   | 9 | N/A                       | 0.000E+0C                                     | 50.5             | ✓      |          |              | ✓         |        |             |      |                              |                                          |
| 155 | Q9DBC7    | KAP0   | cAMP-dependent protein kinase type I-alpha regulatory subunit GN=Prkar1a PE=1 SV=3 - [KAP0_MOUSE]    | 0                      | 2 | 0             | 3 | 0             | 4 | 0   | 9 | N/A                       | 6.533E-03                                     | 43.2             | ✓      |          |              | ✓         |        |             |      |                              |                                          |
| 156 | Q91YT7    | Q91YT7 | Protein Ythdf2 GN=Ythdf2 PE=2 SV=1 - [Q91YT7_MOUSE]                                                  | 0                      | 3 | 0             | 3 | 0             | 3 | 0   | 9 | N/A                       | 0.000E+0C                                     | 62.2             | ✓      |          |              |           | ✓      |             |      |                              |                                          |
| 157 | Q8VE88-2  | F1142  | Isoform 2 of Protein FAM114A2 GN=Fam114a2 - [F1142_MOUSE]                                            | 0                      | 3 | 0             | 3 | 0             | 3 | 0   | 9 | N/A                       | 0.000E+0C                                     | 53.3             | ✓      |          |              | ✓         |        |             |      |                              |                                          |
| 158 | D3YUW8    | D3YUW8 | Pogo transposable element with ZNF domain GN=Pogz PE=4 SV=1 - [D3YUW8_MOUSE]                         | 0                      | 4 | 0             | 3 | 0             | 2 | 0   | 9 | N/A                       | 6.533E-03                                     | 145              | ✓      |          |              |           | ✓      |             |      |                              |                                          |
| 159 | Q3UPH1    | PRRC1  | Protein PRRC1 GN=Prcc1 PE=2 SV=1 - [PRRC1_MOUSE]                                                     | 0                      | 3 | 0             | 2 | 0             | 3 | 0   | 8 | N/A                       | 1.324E-03                                     | 46.3             |        |          | ✓            |           | ✓      | (9)(19)(26) | (17) |                              |                                          |
| 160 | Q8BH97    | RCN3   | Reticulocalbin-3 GN=Rcn3 PE=2 SV=1 - [RCN3_MOUSE]                                                    | 0                      | 2 | 0             | 2 | 0             | 4 | 0   | 8 | N/A                       | 1.613E-02                                     | 38.0             |        |          | ✓            |           | ✓      |             |      |                              | (17)                                     |
| 161 | E9QP49    | E9QP49 | EH domain-binding protein 1-like protein 1 GN=Ehbp111 PE=4 SV=1 - [E9QP49_MOUSE]                     | 0                      | 3 | 0             | 2 | 0             | 3 | 0   | 8 | N/A                       | 1.324E-03                                     | 185              | ✓      |          |              |           |        |             | (9)  |                              |                                          |
| 162 | Q8VCF0    | MAVS   | Mitochondrial antiviral-signaling protein GN=Mavs PE=1 SV=1 - [MAVS_MOUSE]                           | 0                      | 2 | 0             | 3 | 0             | 3 | 0   | 8 | N/A                       | 1.324E-03                                     | 53.4             | ✓      |          |              | ✓         | ✓      | (5)(20)(23) |      |                              |                                          |
| 163 | O09172    | GSH0   | Glutamate--cysteine ligase regulatory subunit GN=Gclm PE=2 SV=1 - [GSH0_MOUSE]                       | 0                      | 2 | 0             | 2 | 0             | 4 | 0   | 8 | N/A                       | 1.613E-02                                     | 30.5             | ✓      |          |              | ✓         |        | (23)(26)    |      |                              |                                          |
| 164 | Q9Z1Z0-2  | USO1   | Isoform 2 of General vesicular transport factor p115 GN=Uso1 - [USO1_MOUSE]                          | 0                      | 1 | 0             | 3 | 0             | 4 | 0   | 8 | N/A                       | 3.902E-02                                     | 100              | ✓      |          |              | ✓         |        | (23)        |      |                              |                                          |
| 165 | Q8K327    | CHAP1  | Chromosome alignment-maintaining phosphoprotein 1 GN=Champ1 PE=1 SV=1 - [CHAP1_MOUSE]                | 0                      | 2 | 0             | 4 | 0             | 2 | 0   | 8 | N/A                       | 1.613E-02                                     | 87.5             | ✓      |          |              |           |        | (23)        |      |                              |                                          |
| 166 | Q3UY34    | CL043  | Uncharacterized protein C12orf43 homolog PE=2 SV=1 - [CL043_MOUSE]                                   | 0                      | 3 | 0             | 3 | 0             | 2 | 0   | 8 | N/A                       | 1.324E-03                                     | 27.6             | ✓      |          |              | ✓         |        | (23)        |      |                              |                                          |
| 167 | Q3UPF5-2  | ZCCHV  | Isoform 2 of Zinc finger CCH-type antiviral protein 1 GN=Zc3hav1 - [ZCCHV_MOUSE]                     | 0                      | 2 | 0             | 4 | 0             | 2 | 0   | 8 | N/A                       | 1.613E-02                                     | 88.2             | ✓      |          |              |           |        | (23)        |      |                              |                                          |
| 168 | P43247    | MSH2   | DNA mismatch repair protein Msh2 GN=Msh2 PE=2 SV=1 - [MSH2_MOUSE]                                    | 0                      | 3 | 0             | 2 | 0             | 3 | 0   | 8 | N/A                       | 1.324E-03                                     | 104              | ✓      |          |              | ✓         |        | (23)        |      |                              |                                          |
| 169 | P63037    | DNJA1  | DnaJ homolog subfamily A member 1 GN=Dnaja1 PE=1 SV=1 - [DNJA1_MOUSE]                                | 0                      | 4 | 0             | 2 | 0             | 2 | 0   | 8 | N/A                       | 1.613E-02                                     | 44.8             | ✓      |          |              | ✓         |        | (19)(26)    |      |                              |                                          |
| 170 | Q99LA2    | Q99LA2 | Protein Zfp207 GN=Zfp207 PE=2 SV=1 - [Q99LA2_MOUSE]                                                  | 0                      | 2 | 0             | 2 | 0             | 4 | 0   | 8 | N/A                       | 1.613E-02                                     | 49.8             | ✓      |          |              |           | ✓      |             |      |                              |                                          |
| 171 | Q6P5B5    | Q6P5B5 | Fragile X mental retardation syndrome-related protein 2 GN=Fxr2 PE=2 SV=1 - [Q6P5B5_MOUSE]           | 0                      | 2 | 0             | 3 | 0             | 3 | 0   | 8 | N/A                       | 1.324E-03                                     | 74.2             | ✓      |          |              | ✓         |        |             |      |                              |                                          |
| 172 | Q6NSQ7    | LTV1   | Protein LTV1 homolog GN=Ltv1 PE=2 SV=2 - [LTV1_MOUSE]                                                | 0                      | 3 | 0             | 1 | 0             | 3 | 0   | 7 | N/A                       | 2.490E-02                                     | 54.0             | ✓      |          |              | ✓         |        | (9)(23)     |      |                              |                                          |
| 173 | P15307    | REL    | Proto-oncogene c-Rel GN=Rel PE=1 SV=2 - [REL_MOUSE]                                                  | 0                      | 3 | 0             | 3 | 0             | 1 | 0   | 7 | N/A                       | 2.490E-02                                     | 64.9             | ✓      |          |              | ✓         | ✓      | (9)(23)     |      |                              |                                          |
| 174 | P05627    | JUN    | Transcription factor AP-1 GN=Jun PE=1 SV=3 - [JUN_MOUSE]                                             | 0                      | 3 | 0             | 1 | 0             | 3 | 0   | 7 | N/A                       | 2.490E-02                                     | 35.9             | ✓      |          |              | ✓         |        | (9)(23)     |      |                              |                                          |
| 175 | Q9WV92-3  | E41L3  | Isoform 3 of Band 4.1-like protein 3 GN=Epb41l3 - [E41L3_MOUSE]                                      | 0                      | 3 | 0             | 2 | 0             | 2 | 0   | 7 | N/A                       | 2.192E-03                                     | 102              | ✓      |          |              |           | ✓      | (9)         |      |                              |                                          |
| 176 | Q6P4T3    | Q6P4T3 | Eyes absent 3 homolog (Drosophila) GN=Eya3 PE=2 SV=1 - [Q6P4T3_MOUSE]                                | 0                      | 2 | 0             | 2 | 0             | 3 | 0   | 7 | N/A                       | 2.192E-03                                     | 57.8             | ✓      |          |              |           | ✓      | (9)         |      |                              |                                          |
| 177 | Q8JZK9    | HMC51  | Hydroxymethylglutaryl-CoA synthase, cytoplasmic GN=Hmgcs1 PE=1 SV=1 - [HMC51_MOUSE]                  | 0                      | 2 | 0             | 2 | 0             | 3 | 0   | 7 | N/A                       | 2.192E-03                                     | 57.5             | ✓      |          |              | ✓         |        | (5)         |      |                              |                                          |
| 178 | O55091    | IMPCT  | Protein IMPACT GN=Impact PE=1 SV=2 - [IMPCT_MOUSE]                                                   | 0                      | 2 | 0             | 2 | 0             | 3 | 0   | 7 | N/A                       | 2.192E-03                                     | 36.3             | ✓      |          |              |           |        | (26)        |      |                              |                                          |
| 179 | Q9CPV4-3  | GLOD4  | Isoform 3 of Glyoxalase domain-containing protein 4 GN=Glod4 - [GLOD4_MOUSE]                         | 0                      | 2 | 0             | 2 | 0             | 3 | 0   | 7 | N/A                       | 2.192E-03                                     | 30.8             | ✓      |          |              | ✓         |        | (23)(26)    |      |                              |                                          |
| 180 | Q9JIH2    | NUP50  | Nuclear pore complex protein Nup50 GN=Nup50 PE=1 SV=3 - [NUP50_MOUSE]                                | 0                      | 3 | 0             | 1 | 0             | 3 | 0   | 7 | N/A                       | 2.490E-02                                     | 49.5             | ✓      |          |              | ✓         |        | (23)        |      |                              |                                          |
| 181 | Q6P5D8    | SMHD1  | Structural maintenance of chromosomes flexible hinge domain-containing protein 1 GN=Smchd1           | 0                      | 2 | 0             | 2 | 0             | 3 | 0   | 7 | N/A                       | 2.192E-03                                     | 226              | ✓      |          |              | ✓         |        | (23)        |      |                              |                                          |
| 182 | Q3TYX3    | SMYD5  | SET and MYND domain-containing protein 5 GN=Smyd5 PE=2 SV=2 - [SMYD5_MOUSE]                          | 0                      | 3 | 0             | 1 | 0             | 3 | 0   | 7 | N/A                       | 2.490E-02                                     | 47.1             | ✓      |          |              |           |        | (23)        |      |                              |                                          |
| 183 | Q69Z38    | PEAK1  | Pseudopodium-enriched atypical kinase 1 GN=Peak1 PE=1 SV=4 - [PEAK1_MOUSE]                           | 0                      | 3 | 0             | 2 | 0             | 2 | 0   | 7 | N/A                       | 2.192E-03                                     | 191              | ✓      |          |              | ✓         |        | (20)(23)    |      |                              |                                          |
| 184 | A2AT19    | A2AT19 | Golgi reassembly stacking protein 2 GN=Gorasp2 PE=4 SV=1 - [A2AT19_MOUSE]                            | 0                      | 1 | 0             | 3 | 0             | 3 | 0   | 7 | N/A                       | 2.490E-02                                     | 45.0             |        |          | ✓            |           | ✓      | (13)        |      |                              |                                          |
| 185 | Q99P91    | GPNMB  | Transmembrane glycoprotein NMB GN=Gpnmb PE=1 SV=2 - [GPNMB_MOUSE]                                    | 0                      | 2 | 0             | 2 | 0             | 3 | 0   | 7 | N/A                       | 2.192E-03                                     | 63.6             |        |          | ✓            |           | ✓      |             |      |                              |                                          |
| 186 | Q5SUH7    | Q5SUH7 | Clathrin interactor 1 GN=Clint1 PE=2 SV=1 - [Q5SUH7_MOUSE]                                           | 0                      | 1 | 0             | 3 | 0             | 3 | 0   | 7 | N/A                       | 2.490E-02                                     | 67.7             | ✓      |          |              |           | ✓      |             |      |                              |                                          |
| 187 | E9QP59    | E9QP59 | Inner nuclear membrane protein Man1 GN=Lemd3 PE=4 SV=1 - [E9QP59_MOUSE]                              | 0                      | 2 | 0             | 3 | 0             | 2 | 0   | 7 | N/A                       | 2.192E-03                                     | 100              | ✓      |          |              | ✓         |        |             |      |                              |                                          |
| 188 | E9Q5E0    | E9Q5E0 | Mycocyte-specific enhancer factor 2D GN=Mef2d PE=4 SV=1 - [E9Q5E0_MOUSE]                             | 0                      | 3 | 0             | 2 | 0             | 2 | 0   | 7 | N/A                       | 2.192E-03                                     | 54.1             | ✓      |          |              |           | ✓      |             |      |                              |                                          |
| 189 | P08207    | S10AA  | Protein S100-A10 GN=S100a10 PE=2 SV=2 - [S10AA_MOUSE]                                                | 0                      | 3 | 0             | 2 | 0             | 2 | 0   | 7 | N/A                       | 2.192E-03                                     | 11.2             |        |          |              |           | ✓      |             |      |                              |                                          |
| 190 | Q62433    | NDRG1  | Protein NDRG1 GN=Ndrgr1 PE=1 SV=1 - [NDRG1_MOUSE]                                                    | 0                      | 2 | 0             | 2 | 0             | 2 | 0   | 6 | N/A                       | 0.000E+0C                                     | 43.0             |        |          |              |           |        | (23)        |      | (16)(17)                     |                                          |
| 191 | A2AAW9    | A2AAW9 | Eukaryotic translation initiation factor 2 subunit 3, X-linked GN=Eif2s3x PE=4 SV=1 - [A2AAW9_MOUSE] | 0                      | 2 | 0             | 1 | 0             | 3 | 0   | 6 | N/A                       | 2.572E-02                                     | 37.2             | ✓      |          |              | ✓         |        | (9)(26)     |      |                              |                                          |
| 192 | Q9CYA6    | ZCHC8  | Zinc finger CCHC domain-containing protein 8 GN=Zchc8 PE=2 SV=3 - [ZCHC8_MOUSE]                      | 0                      | 1 | 0             | 3 | 0             | 2 | 0   | 6 | N/A                       | 2.572E-02                                     | 78.0             | ✓      |          |              | ✓         |        | (9)(23)     |      |                              |                                          |
| 193 | Q9CR86    | CHSP1  | Calcium-regulated heat stable protein 1 GN=Carhsp1 PE=1 SV=1 - [CHSP1_MOUSE]                         | 0                      | 2 | 0             | 2 | 0             | 2 | 0   | 6 | N/A                       | 0.000E+0C                                     | 16.1             | ✓      |          |              | ✓         |        | (9)(23)     |      |                              |                                          |
| 194 | Q03963    | E2AK2  | Interferon-induced, double-stranded RNA-activated protein kinase GN=Eif2ak2 PE=1 SV=2 - [E2A_MOUSE]  | 0                      | 2 | 0             | 3 | 0             | 1 | 0   | 6 | N/A                       | 2.572E-02                                     | 58.2             | ✓      |          |              | ✓         |        | (9)(23)     |      |                              |                                          |
| 195 | Q8VDM6    | HNRL1  | Heterogeneous nuclear ribonucleoprotein U-like protein 1 GN=Hnrnpul1 PE=1 SV=1 - [HNRL1_MOUSE]       | 0                      | 2 | 0             | 2 | 0             | 2 | 0   | 6 | N/A                       | 0.000E+0C                                     | 95.9             | ✓      |          |              |           | ✓      | (9)         |      |                              |                                          |

|     |           |        |                                                                                                              |   |   |   |   |   |   |   |   |     |           | GlcNAz                        |                      |                      |                                        |                                                               |      |               |             |                                                       |                                                        |   |   |   |     |  |  |  |  |
|-----|-----------|--------|--------------------------------------------------------------------------------------------------------------|---|---|---|---|---|---|---|---|-----|-----------|-------------------------------|----------------------|----------------------|----------------------------------------|---------------------------------------------------------------|------|---------------|-------------|-------------------------------------------------------|--------------------------------------------------------|---|---|---|-----|--|--|--|--|
|     |           |        |                                                                                                              |   |   |   |   |   |   |   |   |     |           | Spectral Counts               |                      |                      |                                        |                                                               |      |               |             |                                                       |                                                        |   |   |   |     |  |  |  |  |
|     |           |        |                                                                                                              |   |   |   |   |   |   |   |   |     |           | Ex-<br>peri-<br>ment          | Ex-<br>peri-<br>ment | Ex-<br>peri-<br>ment | Sum                                    |                                                               |      |               |             |                                                       |                                                        |   |   |   |     |  |  |  |  |
|     |           |        |                                                                                                              |   |   |   |   |   |   |   |   |     |           | Localization                  |                      |                      |                                        |                                                               |      |               |             |                                                       |                                                        |   |   |   |     |  |  |  |  |
| No. | Accession | Gene   | Description                                                                                                  | - | + | - | + | - | + | - | + | -   | +         | En-<br>rich-<br>ment<br>Ratio | t-test               | MW<br>[kDa]          | Exclu-<br>sively<br>Intracellu-<br>lar | Exclusively<br>Extracellu-<br>lar, Lyso-<br>somal,<br>Luminal | Both | 6AzGI<br>cNAc | Gal-<br>NAz | Previous O-<br>GlcNAc<br>Proteomics<br>Identification | Previous<br>Mucin<br>Proteomics<br>Identifica-<br>tion |   |   |   |     |  |  |  |  |
|     |           |        |                                                                                                              |   |   |   |   |   |   |   |   |     |           |                               |                      |                      |                                        |                                                               |      |               |             |                                                       |                                                        | 1 | 2 | 3 | Sum |  |  |  |  |
| 196 | Q8K0C9    | GMDS   | GDP-mannose 4,6 dehydratase GN=GmDs PE=2 SV=1 - [GMDS_MOUSE]                                                 | 0 | 1 | 0 | 2 | 0 | 3 | 0 | 6 | N/A | 2.572E-02 | 42.0                          | ✓                    |                      |                                        |                                                               |      | ✓             |             | (9)                                                   |                                                        |   |   |   |     |  |  |  |  |
| 197 | Q3TL72    | Q3TL72 | NEDD8-activating enzyme E1 catalytic subunit GN=Uba3 PE=2 SV=1 - [Q3TL72_MOUSE]                              | 0 | 3 | 0 | 2 | 0 | 1 | 0 | 6 | N/A | 2.572E-02 | 49.9                          | ✓                    |                      |                                        |                                                               |      |               |             | (9)                                                   |                                                        |   |   |   |     |  |  |  |  |
| 198 | B7ZCL8    | B7ZCL8 | 55 kDa erythrocyte membrane protein GN=Mpp1 PE=4 SV=1 - [B7ZCL8_MOUSE]                                       | 0 | 1 | 0 | 2 | 0 | 3 | 0 | 6 | N/A | 2.572E-02 | 49.8                          |                      |                      |                                        |                                                               |      | ✓             |             | (9)                                                   |                                                        |   |   |   |     |  |  |  |  |
| 199 | Q8K298    | ANLN   | Actin-binding protein anillin GN=Anln PE=1 SV=2 - [ANLN_MOUSE]                                               | 0 | 2 | 0 | 1 | 0 | 3 | 0 | 6 | N/A | 2.572E-02 | 123                           | ✓                    |                      |                                        |                                                               |      | ✓             |             | (23)(26)                                              |                                                        |   |   |   |     |  |  |  |  |
| 200 | Q9CWE0    | FA54B  | Protein FAM54B GN=Fam54b PE=1 SV=1 - [FA54B_MOUSE]                                                           | 0 | 2 | 0 | 2 | 0 | 2 | 0 | 6 | N/A | 0.000E+00 | 31.7                          | ✓                    |                      |                                        |                                                               |      | ✓             |             | (23)                                                  |                                                        |   |   |   |     |  |  |  |  |
| 201 | P62774    | MTPN   | Myotrophin GN=Mtpn PE=1 SV=2 - [MTPN_MOUSE]                                                                  | 0 | 2 | 0 | 2 | 0 | 2 | 0 | 6 | N/A | 0.000E+00 | 12.9                          | ✓                    |                      |                                        |                                                               |      | ✓             |             | (23)                                                  |                                                        |   |   |   |     |  |  |  |  |
| 202 | O88622-2  | PARG   | Isoform 2 of Poly(ADP-ribose) glycohydrolase GN=Parg - [PARG_MOUSE]                                          | 0 | 2 | 0 | 2 | 0 | 2 | 0 | 6 | N/A | 0.000E+00 | 104                           | ✓                    |                      |                                        |                                                               |      | ✓             |             | (23)                                                  |                                                        |   |   |   |     |  |  |  |  |
| 203 | P42669    | PURA   | Transcriptional activator protein Pur-alpha GN=Pura PE=1 SV=1 - [PURA_MOUSE]                                 | 0 | 1 | 0 | 2 | 0 | 3 | 0 | 6 | N/A | 2.572E-02 | 34.9                          | ✓                    |                      |                                        |                                                               |      | ✓             |             | (20)(23)                                              |                                                        |   |   |   |     |  |  |  |  |
| 204 | Q6NZN0-5  | RBM26  | Isoform 5 of RNA-binding protein 26 GN=Rbm26 - [RBM26_MOUSE]                                                 | 0 | 2 | 0 | 2 | 0 | 2 | 0 | 6 | N/A | 0.000E+00 | 111                           | ✓                    |                      |                                        |                                                               |      |               | ✓           | (19)(23)                                              |                                                        |   |   |   |     |  |  |  |  |
| 205 | Q55FM8-2  | RBM27  | Isoform 2 of RNA-binding protein 27 GN=Rbm27 - [RBM27_MOUSE]                                                 | 0 | 1 | 0 | 2 | 0 | 3 | 0 | 6 | N/A | 2.572E-02 | 113                           | ✓                    |                      |                                        |                                                               |      |               | ✓           | (19)(23)                                              |                                                        |   |   |   |     |  |  |  |  |
| 206 | Q5PSV9    | MDC1   | Mediator of DNA damage checkpoint protein 1 GN=Mdc1 PE=1 SV=1 - [MDC1_MOUSE]                                 | 0 | 3 | 0 | 1 | 0 | 2 | 0 | 6 | N/A | 2.572E-02 | 185                           | ✓                    |                      |                                        |                                                               |      | ✓             |             | (14)(23)                                              |                                                        |   |   |   |     |  |  |  |  |
| 207 | P35235    | PTN11  | Tyrosine-protein phosphatase non-receptor type 11 GN=Ptpn11 PE=1 SV=2 - [PTN11_MOUSE]                        | 0 | 2 | 0 | 1 | 0 | 3 | 0 | 6 | N/A | 2.572E-02 | 68.4                          | ✓                    |                      |                                        |                                                               |      | ✓             |             | (14)(23)                                              |                                                        |   |   |   |     |  |  |  |  |
| 208 | P0C7T6    | ATX1L  | Ataxin-1-like GN=Atxn1l PE=1 SV=1 - [ATX1L_MOUSE]                                                            | 0 | 2 | 0 | 2 | 0 | 2 | 0 | 6 | N/A | 0.000E+00 | 73.3                          | ✓                    |                      |                                        |                                                               |      |               | ✓           | (1)(9)                                                |                                                        |   |   |   |     |  |  |  |  |
| 209 | Q8C2Q3    | RBM14  | RNA-binding protein 14 GN=Rbm14 PE=1 SV=1 - [RBM14_MOUSE]                                                    | 0 | 2 | 0 | 3 | 0 | 1 | 0 | 6 | N/A | 2.572E-02 | 69.4                          | ✓                    |                      |                                        |                                                               |      |               | ✓           | (1)(20)(23)(24)                                       |                                                        |   |   |   |     |  |  |  |  |
| 210 | Q8BH80    | Q8BH80 | Vesicle-associated membrane protein, associated protein B and C GN=Vapb PE=2 SV=1 - [Q8BH80_MOUSE]           | 0 | 2 | 0 | 1 | 0 | 3 | 0 | 6 | N/A | 2.572E-02 | 26.9                          |                      |                      |                                        |                                                               | ✓    |               |             |                                                       |                                                        |   |   |   |     |  |  |  |  |
| 211 | Q9JJU8    | SH3L1  | SH3 domain-binding glutamic acid-rich-like protein GN=Sh3bgrl PE=2 SV=1 - [SH3L1_MOUSE]                      | 0 | 2 | 0 | 2 | 0 | 2 | 0 | 6 | N/A | 0.000E+00 | 12.8                          | ✓                    |                      |                                        |                                                               |      |               |             |                                                       |                                                        |   |   |   |     |  |  |  |  |
| 212 | P35123    | UBP4   | Ubiquitin carboxyl-terminal hydrolase 4 GN=Usp4 PE=1 SV=3 - [UBP4_MOUSE]                                     | 0 | 1 | 0 | 2 | 0 | 3 | 0 | 6 | N/A | 2.572E-02 | 108                           | ✓                    |                      |                                        |                                                               |      | ✓             |             |                                                       |                                                        |   |   |   |     |  |  |  |  |
| 213 | E9Q7C1    | E9Q7C1 | Mediator of RNA polymerase II transcription subunit 15 GN=Med15 PE=4 SV=1 - [E9Q7C1_MOUSE]                   | 0 | 2 | 0 | 2 | 0 | 2 | 0 | 6 | N/A | 0.000E+00 | 82.5                          | ✓                    |                      |                                        |                                                               |      |               | ✓           |                                                       |                                                        |   |   |   |     |  |  |  |  |
| 214 | E9Q5L7    | E9Q5L7 | PHD finger protein 10 GN=Phf10 PE=4 SV=2 - [E9Q5L7_MOUSE]                                                    | 0 | 2 | 0 | 2 | 0 | 2 | 0 | 6 | N/A | 0.000E+00 | 26.9                          | ✓                    |                      |                                        |                                                               |      | ✓             |             |                                                       |                                                        |   |   |   |     |  |  |  |  |
| 215 | B1ATZ0    | B1ATZ0 | HGF-regulated tyrosine kinase substrate GN=Hgs PE=4 SV=1 - [B1ATZ0_MOUSE]                                    | 0 | 2 | 0 | 2 | 0 | 2 | 0 | 6 | N/A | 0.000E+00 | 85.7                          | ✓                    |                      |                                        |                                                               |      |               |             | ✓                                                     |                                                        |   |   |   |     |  |  |  |  |
| 216 | P17047    | LAMP2  | Lysosome-associated membrane glycoprotein 2 GN=Lamp2 PE=2 SV=2 - [LAMP2_MOUSE]                               | 0 | 1 | 0 | 2 | 0 | 2 | 0 | 5 | N/A | 7.490E-03 | 45.7                          |                      |                      |                                        |                                                               | ✓    |               | ✓           | (9)(23)                                               | (3)(16)(17)                                            |   |   |   |     |  |  |  |  |
| 217 | Q8VIJ6    | SFPQ   | Splicing factor, proline- and glutamine-rich GN=Sfpq PE=1 SV=1 - [SFPQ_MOUSE]                                | 0 | 2 | 0 | 2 | 0 | 1 | 0 | 5 | N/A | 7.490E-03 | 75.4                          | ✓                    |                      |                                        |                                                               |      |               | ✓           | (5)(9)(19)(20)(23)(24)                                | (17)                                                   |   |   |   |     |  |  |  |  |
| 218 | Q8BPP5    | FBLN3  | EGF-containing fibulin-like extracellular matrix protein 1 GN=Efemp1 PE=2 SV=1 - [FBLN3_MOUSE]               | 0 | 2 | 0 | 1 | 0 | 2 | 0 | 5 | N/A | 7.490E-03 | 54.9                          |                      |                      |                                        | ✓                                                             |      |               | ✓           |                                                       | (16)                                                   |   |   |   |     |  |  |  |  |
| 219 | P15379-2  | CD44   | Isoform 13 of CD44 antigen GN=Cd44 - [CD44_MOUSE]                                                            | 0 | 1 | 0 | 2 | 0 | 2 | 0 | 5 | N/A | 7.490E-03 | 40.0                          |                      |                      |                                        |                                                               | ✓    |               | ✓           | (23)                                                  | (10)(16)                                               |   |   |   |     |  |  |  |  |
| 220 | Q9WTX5    | SKP1   | S-phase kinase-associated protein 1 GN=Skp1 PE=1 SV=3 - [SKP1_MOUSE]                                         | 0 | 2 | 0 | 1 | 0 | 2 | 0 | 5 | N/A | 7.490E-03 | 18.7                          | ✓                    |                      |                                        |                                                               |      | ✓             |             | (9)(23)                                               |                                                        |   |   |   |     |  |  |  |  |
| 221 | Q9JKP5    | MBNL1  | Muscleblind-like protein 1 GN=Mbnl1 PE=1 SV=1 - [MBNL1_MOUSE]                                                | 0 | 2 | 0 | 2 | 0 | 1 | 0 | 5 | N/A | 7.490E-03 | 37.0                          | ✓                    |                      |                                        |                                                               |      | ✓             | ✓           | (9)(23)                                               |                                                        |   |   |   |     |  |  |  |  |
| 222 | Q9CU62    | SMC1A  | Structural maintenance of chromosomes protein 1A GN=Smc1a PE=1 SV=4 - [SMC1A_MOUSE]                          | 0 | 1 | 0 | 2 | 0 | 2 | 0 | 5 | N/A | 7.490E-03 | 143                           | ✓                    |                      |                                        |                                                               |      |               |             | (9)(23)                                               |                                                        |   |   |   |     |  |  |  |  |
| 223 | Q8BT60    | CPNE3  | Copine-3 GN=Cpne3 PE=1 SV=2 - [CPNE3_MOUSE]                                                                  | 0 | 2 | 0 | 2 | 0 | 1 | 0 | 5 | N/A | 7.490E-03 | 59.5                          | ✓                    |                      |                                        |                                                               |      |               |             | (9)(23)                                               |                                                        |   |   |   |     |  |  |  |  |
| 224 | P11983-2  | TCPA   | Isoform 2 of T-complex protein 1 subunit alpha GN=Tcp1 - [TCPA_MOUSE]                                        | 0 | 2 | 0 | 2 | 0 | 1 | 0 | 5 | N/A | 7.490E-03 | 55.4                          | ✓                    |                      |                                        |                                                               |      |               |             | (9)(14)(23)(26)                                       |                                                        |   |   |   |     |  |  |  |  |
| 225 | Q9Z1B5    | MD2L1  | Mitotic spindle assembly checkpoint protein MAD2A GN=Mad2l1 PE=2 SV=2 - [MD2L1_MOUSE]                        | 0 | 2 | 0 | 1 | 0 | 2 | 0 | 5 | N/A | 7.490E-03 | 23.6                          | ✓                    |                      |                                        |                                                               |      |               | ✓           | (9)                                                   |                                                        |   |   |   |     |  |  |  |  |
| 226 | H3BJU7    | H3BJU7 | Rho guanine nucleotide exchange factor 2 GN=Arhgef2 PE=4 SV=1 - [H3BJU7_MOUSE]                               | 0 | 2 | 0 | 1 | 0 | 2 | 0 | 5 | N/A | 7.490E-03 | 109                           | ✓                    |                      |                                        |                                                               |      |               |             | (9)                                                   |                                                        |   |   |   |     |  |  |  |  |
| 227 | Q61595-2  | KTN1   | Isoform 2 of Kinectin GN=Ktn1 - [KTN1_MOUSE]                                                                 | 0 | 2 | 0 | 2 | 0 | 1 | 0 | 5 | N/A | 7.490E-03 | 138                           |                      |                      |                                        |                                                               | ✓    |               |             | (23)                                                  |                                                        |   |   |   |     |  |  |  |  |
| 228 | Q9CR00    | PSMD9  | 26S proteasome non-ATPase regulatory subunit 9 GN=Psmd9 PE=1 SV=1 - [PSMD9_MOUSE]                            | 0 | 2 | 0 | 2 | 0 | 1 | 0 | 5 | N/A | 7.490E-03 | 24.7                          | ✓                    |                      |                                        |                                                               |      | ✓             |             | (23)                                                  |                                                        |   |   |   |     |  |  |  |  |
| 229 | Q8R2M2    | TDIF2  | Deoxynucleotidyltransferase terminal-interacting protein 2 GN=Dntip2 PE=1 SV=1 - [TDIF2_MOUSE]               | 0 | 1 | 0 | 2 | 0 | 2 | 0 | 5 | N/A | 7.490E-03 | 84.2                          | ✓                    |                      |                                        |                                                               |      | ✓             |             | (23)                                                  |                                                        |   |   |   |     |  |  |  |  |
| 230 | Q80YR4-2  | ZN598  | Isoform 2 of Zinc finger protein 598 GN=Znf598 - [ZN598_MOUSE]                                               | 0 | 2 | 0 | 2 | 0 | 1 | 0 | 5 | N/A | 7.490E-03 | 96.3                          | ✓                    |                      |                                        |                                                               |      | ✓             |             | (23)                                                  |                                                        |   |   |   |     |  |  |  |  |
| 231 | Q7TNV0    | DEK    | Protein DEK GN=Dek PE=1 SV=1 - [DEK_MOUSE]                                                                   | 0 | 2 | 0 | 1 | 0 | 2 | 0 | 5 | N/A | 7.490E-03 | 43.1                          | ✓                    |                      |                                        |                                                               |      | ✓             |             | (23)                                                  |                                                        |   |   |   |     |  |  |  |  |
| 232 | B1AR09    | B1AR09 | Myeloid/lymphoid or mixed lineage-leukemia translocation to 6 homolog (Drosophila) GN=Mllt6 - [B1AR09_MOUSE] | 0 | 1 | 0 | 2 | 0 | 2 | 0 | 5 | N/A | 7.490E-03 | 111                           | ✓                    |                      |                                        |                                                               |      |               | ✓           | (20)                                                  |                                                        |   |   |   |     |  |  |  |  |
| 233 | Q8VI36-2  | PAXI   | Isoform Alpha of Paxillin GN=Pxn - [PAXI_MOUSE]                                                              | 0 | 1 | 0 | 2 | 0 | 2 | 0 | 5 | N/A | 7.490E-03 | 60.8                          | ✓                    |                      |                                        |                                                               |      |               | ✓           | (14)(23)                                              |                                                        |   |   |   |     |  |  |  |  |
| 234 | P80317    | TCPZ   | T-complex protein 1 subunit zeta GN=Cct6a PE=1 SV=3 - [TCPZ_MOUSE]                                           | 0 | 1 | 0 | 2 | 0 | 2 | 0 | 5 | N/A | 7.490E-03 | 58.0                          | ✓                    |                      |                                        |                                                               |      |               |             | (14)                                                  |                                                        |   |   |   |     |  |  |  |  |
| 235 | Q8BP48    | AMPM1  | Methionine aminopeptidase 1 GN=Metap1 PE=2 SV=1 - [AMPM1_MOUSE]                                              | 0 | 2 | 0 | 2 | 0 | 1 | 0 | 5 | N/A | 7.490E-03 | 43.2                          | ✓                    |                      |                                        |                                                               |      | ✓             |             |                                                       |                                                        |   |   |   |     |  |  |  |  |
| 236 | Q8BH93    | MISSL  | MAPK-interacting and spindle-stabilizing protein-like GN=Mapk1ip1l PE=2 SV=3 - [MISSL_MOUSE]                 | 0 | 2 | 0 | 1 | 0 | 2 | 0 | 5 | N/A | 7.490E-03 | 23.9                          | ✓                    |                      |                                        |                                                               |      |               | ✓           |                                                       |                                                        |   |   |   |     |  |  |  |  |
| 237 | Q62219-6  | TGFI1  | Isoform 6 of Transforming growth factor beta-1-induced transcript 1 protein GN=Tgfb1i1 - [TGFI1_MOUSE]       | 0 | 2 | 0 | 2 | 0 | 1 | 0 | 5 | N/A | 7.490E-03 | 6.6                           | ✓                    |                      |                                        |                                                               |      |               |             |                                                       |                                                        |   |   |   |     |  |  |  |  |

|     |           |        |                                                                                                            |   |   |   |   |   |   |   |   |   |     |           | GlcNAz          |       |             |            |      |      |       |             |             |             |             |          |  |  |  |  |  |  |  |
|-----|-----------|--------|------------------------------------------------------------------------------------------------------------|---|---|---|---|---|---|---|---|---|-----|-----------|-----------------|-------|-------------|------------|------|------|-------|-------------|-------------|-------------|-------------|----------|--|--|--|--|--|--|--|
|     |           |        |                                                                                                            |   |   |   |   |   |   |   |   |   |     |           | Spectral Counts |       |             |            |      |      |       |             |             |             |             |          |  |  |  |  |  |  |  |
|     |           |        |                                                                                                            |   |   |   |   |   |   |   |   |   |     |           | Ex-             | Ex-   | Ex-         |            |      |      |       |             |             |             |             |          |  |  |  |  |  |  |  |
|     |           |        |                                                                                                            |   |   |   |   |   |   |   |   |   |     |           | peri-           | peri- | peri-       |            |      |      |       |             |             |             |             |          |  |  |  |  |  |  |  |
|     |           |        |                                                                                                            |   |   |   |   |   |   |   |   |   |     |           | ment            | ment  | ment        |            |      |      |       |             |             |             |             |          |  |  |  |  |  |  |  |
|     |           |        |                                                                                                            |   |   |   |   |   |   |   |   |   |     |           | 1               | 2     | 3           | Sum        |      |      |       |             |             |             |             |          |  |  |  |  |  |  |  |
|     |           |        |                                                                                                            |   |   |   |   |   |   |   |   |   |     |           | Localization    |       |             |            |      |      |       |             |             |             |             |          |  |  |  |  |  |  |  |
| No. | Accession | Gene   | Description                                                                                                | - | + | - | + | - | + | - | + | - | +   | En-       | t-test          | MW    | Ex-         | Ex-        |      |      | 6AzGI | Gal-        | Previous O- | Previous    |             |          |  |  |  |  |  |  |  |
|     |           |        |                                                                                                            |   |   |   |   |   |   |   |   |   |     | rich-     |                 | [kDa] | clus-       | clus-      | Both | cNAc | NAz   | GlcNAc      | O-          | Mucin       |             |          |  |  |  |  |  |  |  |
|     |           |        |                                                                                                            |   |   |   |   |   |   |   |   |   |     | ment      |                 |       | ively       | ively      |      |      |       | Proteomics  | Proteomics  | Identifica- |             |          |  |  |  |  |  |  |  |
|     |           |        |                                                                                                            |   |   |   |   |   |   |   |   |   |     | ion       |                 |       | Intracellu- | lar, Lyso- |      |      |       | Identifica- | Identifica- | tion        |             |          |  |  |  |  |  |  |  |
|     |           |        |                                                                                                            |   |   |   |   |   |   |   |   |   |     |           |                 |       | lar         | somal,     |      |      |       |             |             |             |             |          |  |  |  |  |  |  |  |
|     |           |        |                                                                                                            |   |   |   |   |   |   |   |   |   |     |           |                 |       | Luminal     |            |      |      |       |             |             |             |             |          |  |  |  |  |  |  |  |
| 238 | F6TWX0    | F6TWX0 | Nuclear transcription factor Y subunit alpha (Fragment) GN=Nfya PE=4 SV=1 - [F6TWX0_MOUSE]                 | 0 | 2 | 0 | 2 | 0 | 1 | 0 | 0 | 5 | N/A | 7.490E-03 | 22.7            | ✓     |             |            |      |      |       |             |             |             |             |          |  |  |  |  |  |  |  |
| 239 | E9Q242    | E9Q242 | Adenylosuccinate lyase GN=Adsl PE=4 SV=1 - [E9Q242_MOUSE]                                                  | 0 | 2 | 0 | 2 | 0 | 1 | 0 | 0 | 5 | N/A | 7.490E-03 | 53.1            | ✓     |             |            |      |      | ✓     |             |             |             |             |          |  |  |  |  |  |  |  |
| 240 | B7ZP47    | B7ZP47 | Wapal protein GN=Wapal PE=2 SV=1 - [B7ZP47_MOUSE]                                                          | 0 | 2 | 0 | 2 | 0 | 1 | 0 | 0 | 5 | N/A | 7.490E-03 | 133             | ✓     |             |            |      |      | ✓     |             |             |             |             |          |  |  |  |  |  |  |  |
| 241 | P11438    | LAMP1  | Lysosome-associated membrane glycoprotein 1 GN=Lamp1 PE=1 SV=2 - [LAMP1_MOUSE]                             | 0 | 2 | 0 | 1 | 0 | 1 | 0 | 1 | 0 | 4   | N/A       | 1.613E-02       | 43.8  |             |            | ✓    |      |       | ✓           | (23)        | (3)(15)(16) |             |          |  |  |  |  |  |  |  |
| 242 | Q925B0-2  | PAWR   | Isoform 2 of PRKC apoptosis WT1 regulator protein GN=Pawr - [PAWR_MOUSE]                                   | 0 | 2 | 0 | 1 | 0 | 1 | 0 | 1 | 0 | 4   | N/A       | 1.613E-02       | 30.9  | ✓           |            |      |      |       |             |             | (9)(23)     |             |          |  |  |  |  |  |  |  |
| 243 | Q8CDN6    | TXNL1  | Thioredoxin-like protein 1 GN=Txn1 PE=1 SV=3 - [TXNL1_MOUSE]                                               | 0 | 1 | 0 | 2 | 0 | 1 | 0 | 1 | 0 | 4   | N/A       | 1.613E-02       | 32.2  | ✓           |            |      |      |       |             |             | (9)(23)     |             |          |  |  |  |  |  |  |  |
| 244 | Q3B7Z2-2  | OSBP1  | Isoform 2 of Oxysterol-binding protein 1 GN=Osbp - [OSBP1_MOUSE]                                           | 0 | 1 | 0 | 1 | 0 | 2 | 0 | 2 | 0 | 4   | N/A       | 1.613E-02       | 61.6  | ✓           |            |      |      |       |             |             | (9)(23)     |             |          |  |  |  |  |  |  |  |
| 245 | Q80UU9    | PGRC2  | Membrane-associated progesterone receptor component 2 GN=Pgrmc2 PE=1 SV=2 - [PGRC2_MOUSE]                  | 0 | 2 | 0 | 1 | 0 | 1 | 0 | 1 | 0 | 4   | N/A       | 1.613E-02       | 23.3  |             |            | ✓    |      |       |             |             |             | (9)         |          |  |  |  |  |  |  |  |
| 246 | Q9Z0E6    | GBP2   | Interferon-induced guanylate-binding protein 2 GN=Gbp2 PE=1 SV=1 - [GBP2_MOUSE]                            | 0 | 2 | 0 | 1 | 0 | 1 | 0 | 1 | 0 | 4   | N/A       | 1.613E-02       | 66.7  | ✓           |            |      |      | ✓     |             |             |             | (9)         |          |  |  |  |  |  |  |  |
| 247 | Q9R1J0    | NSDHL  | Sterol-4-alpha-carboxylate 3-dehydrogenase, decarboxylating GN=Nsdhl PE=2 SV=1 - [NSDHL_MOUSE]             | 0 | 1 | 0 | 1 | 0 | 2 | 0 | 2 | 0 | 4   | N/A       | 1.613E-02       | 40.7  | ✓           |            |      |      |       | ✓           |             |             | (9)         |          |  |  |  |  |  |  |  |
| 248 | Q8BIH0-2  | SP130  | Isoform 2 of Histone deacetylase complex subunit SAP130 GN=Sap130 - [SP130_MOUSE]                          | 0 | 1 | 0 | 2 | 0 | 1 | 0 | 1 | 0 | 4   | N/A       | 1.613E-02       | 92.8  | ✓           |            |      |      |       |             | ✓           |             |             | (9)      |  |  |  |  |  |  |  |
| 249 | Q8K1M6-4  | DNM1L  | Isoform 4 of Dynamin-1-like protein GN=Dnm1l - [DNM1L_MOUSE]                                               | 0 | 1 | 0 | 2 | 0 | 1 | 0 | 1 | 0 | 4   | N/A       | 1.613E-02       | 68.7  | ✓           |            |      |      |       |             |             |             | (5)(9)      |          |  |  |  |  |  |  |  |
| 250 | P13439    | UMPS   | Uridine 5'-monophosphate synthase GN=Umps PE=2 SV=3 - [UMPS_MOUSE]                                         | 0 | 1 | 0 | 2 | 0 | 1 | 0 | 1 | 0 | 4   | N/A       | 1.613E-02       | 52.3  | ✓           |            |      |      |       |             |             |             | (26)        |          |  |  |  |  |  |  |  |
| 251 | P35278    | RAB5C  | Ras-related protein Rab-5C GN=Rab5c PE=1 SV=2 - [RAB5C_MOUSE]                                              | 0 | 1 | 0 | 1 | 0 | 2 | 0 | 2 | 0 | 4   | N/A       | 1.613E-02       | 23.4  | ✓           |            |      |      | ✓     |             |             |             | (23)(26)    |          |  |  |  |  |  |  |  |
| 252 | Q64514-2  | TPP2   | Isoform Short of Tripeptidyl-peptidase 2 GN=Tpp2 - [TPP2_MOUSE]                                            | 0 | 2 | 0 | 1 | 0 | 1 | 0 | 1 | 0 | 4   | N/A       | 1.613E-02       | 138   | ✓           |            |      |      |       | ✓           |             |             | (23)        |          |  |  |  |  |  |  |  |
| 253 | Q60953-2  | PML    | Isoform 2 of Protein PML GN=Pml - [PML_MOUSE]                                                              | 0 | 1 | 0 | 2 | 0 | 1 | 0 | 1 | 0 | 4   | N/A       | 1.613E-02       | 93.2  | ✓           |            |      |      |       |             |             |             | (23)        |          |  |  |  |  |  |  |  |
| 254 | P51432    | PLCB3  | 1-phosphatidylinositol 4,5-bisphosphate phosphodiesterase beta-3 GN=Plcb3 PE=2 SV=2 - [PLCB3_MOUSE]        | 0 | 1 | 0 | 2 | 0 | 1 | 0 | 1 | 0 | 4   | N/A       | 1.613E-02       | 139   | ✓           |            |      |      |       |             |             |             | (23)        |          |  |  |  |  |  |  |  |
| 255 | O88291    | ZN326  | DBIRD complex subunit ZNF326 GN=Znf326 PE=1 SV=1 - [ZN326_MOUSE]                                           | 0 | 2 | 0 | 1 | 0 | 1 | 0 | 1 | 0 | 4   | N/A       | 1.613E-02       | 65.2  | ✓           |            |      |      |       |             |             |             | (23)        |          |  |  |  |  |  |  |  |
| 256 | Q8BQM4    | HEAT3  | HEAT repeat-containing protein 3 GN=Heat3 PE=2 SV=1 - [HEAT3_MOUSE]                                        | 0 | 1 | 0 | 1 | 0 | 2 | 0 | 2 | 0 | 4   | N/A       | 1.613E-02       | 74.3  | ✓           |            |      |      |       |             |             |             | (23)        |          |  |  |  |  |  |  |  |
| 257 | Q9JKV1    | ADRM1  | Proteasomal ubiquitin receptor ADRM1 GN=Adrm1 PE=1 SV=2 - [ADRM1_MOUSE]                                    | 0 | 2 | 0 | 1 | 0 | 1 | 0 | 1 | 0 | 4   | N/A       | 1.613E-02       | 42.0  | ✓           |            |      |      |       |             | ✓           |             |             | (20)(23) |  |  |  |  |  |  |  |
| 258 | P00493    | HPRT   | Hypoxanthine-guanine phosphoribosyltransferase GN=Hprt1 PE=1 SV=3 - [HPRT_MOUSE]                           | 0 | 1 | 0 | 2 | 0 | 1 | 0 | 1 | 0 | 4   | N/A       | 1.613E-02       | 24.6  | ✓           |            |      |      | ✓     |             |             |             | (19)        |          |  |  |  |  |  |  |  |
| 259 | Q922Y1    | UBXN1  | UBX domain-containing protein 1 GN=Ubxn1 PE=1 SV=1 - [UBXN1_MOUSE]                                         | 0 | 1 | 0 | 1 | 0 | 2 | 0 | 2 | 0 | 4   | N/A       | 1.613E-02       | 33.6  | ✓           |            |      |      |       |             |             |             | (1)(23)     |          |  |  |  |  |  |  |  |
| 260 | E9Q9C5    | E9Q9C5 | V-type proton ATPase 16 kDa proteolipid subunit (Fragment) GN=Atp6v0c PE=3 SV=1 - [E9Q9C5_MOUSE]           | 0 | 1 | 0 | 1 | 0 | 2 | 0 | 2 | 0 | 4   | N/A       | 1.613E-02       | 15.3  |             |            |      | ✓    |       | ✓           |             |             |             |          |  |  |  |  |  |  |  |
| 261 | Q8K1M3    | Q8K1M3 | Protein kinase, cAMP dependent regulatory, type II alpha GN=Prkar2a PE=2 SV=1 - [Q8K1M3_MOUSE]             | 0 | 1 | 0 | 1 | 0 | 2 | 0 | 2 | 0 | 4   | N/A       | 1.613E-02       | 45.6  | ✓           |            |      |      |       |             |             |             |             |          |  |  |  |  |  |  |  |
| 262 | Q8OU35    | ARHG17 | Rho guanine nucleotide exchange factor 17 GN=Arhgef17 PE=1 SV=2 - [ARHG17_MOUSE]                           | 0 | 1 | 0 | 1 | 0 | 2 | 0 | 2 | 0 | 4   | N/A       | 1.613E-02       | 222   | ✓           |            |      |      |       |             |             |             |             |          |  |  |  |  |  |  |  |
| 263 | Q6ZQK5    | ACAP2  | Arf-GAP with coiled-coil, ANK repeat and PH domain-containing protein 2 GN=Acap2 PE=1 SV=2 - [ACAP2_MOUSE] | 0 | 1 | 0 | 1 | 0 | 2 | 0 | 2 | 0 | 4   | N/A       | 1.613E-02       | 87.2  | ✓           |            |      |      |       | ✓           |             |             |             |          |  |  |  |  |  |  |  |
| 264 | Q6QZ26    | ACOT5  | Acyl-coenzyme A thioesterase 5 GN=Acot5 PE=1 SV=2 - [ACOT5_MOUSE]                                          | 0 | 1 | 0 | 1 | 0 | 2 | 0 | 2 | 0 | 4   | N/A       | 1.613E-02       | 46.5  | ✓           |            |      |      |       |             |             |             |             |          |  |  |  |  |  |  |  |
| 265 | G3UW40    | G3UW40 | MCG4620, isoform CRA_b GN=Mcc PE=4 SV=1 - [G3UW40_MOUSE]                                                   | 0 | 2 | 0 | 1 | 0 | 1 | 0 | 1 | 0 | 4   | N/A       | 1.613E-02       | 92.8  | ✓           |            |      |      |       | ✓           |             |             |             |          |  |  |  |  |  |  |  |
| 266 | P02469    | LAMB1  | Laminin subunit beta-1 GN=Lamb1 PE=1 SV=3 - [LAMB1_MOUSE]                                                  | 0 | 1 | 0 | 1 | 0 | 1 | 0 | 1 | 0 | 3   | N/A       | 0.000E+00       | 197   |             |            | ✓    |      |       |             |             |             | (9)         | (16)(17) |  |  |  |  |  |  |  |
| 267 | Q6PGH2    | HN1L   | Hematological and neurological expressed 1-like protein GN=Hn1l PE=2 SV=1 - [HN1L_MOUSE]                   | 0 | 1 | 0 | 1 | 0 | 1 | 0 | 1 | 0 | 3   | N/A       | 0.000E+00       | 20.0  | ✓           |            |      |      | ✓     |             |             |             | (9)(23)(26) | (16)     |  |  |  |  |  |  |  |
| 268 | Q62348    | TSN    | Translin GN=Tsn PE=1 SV=1 - [TSN_MOUSE]                                                                    | 0 | 1 | 0 | 1 | 0 | 1 | 0 | 1 | 0 | 3   | N/A       | 0.000E+00       | 26.2  | ✓           |            |      |      | ✓     | ✓           |             |             | (9)(23)(26) |          |  |  |  |  |  |  |  |
| 269 | Q9Z2M7    | PMM2   | Phosphomannomutase 2 GN=Pmm2 PE=2 SV=1 - [PMM2_MOUSE]                                                      | 0 | 1 | 0 | 1 | 0 | 1 | 0 | 1 | 0 | 3   | N/A       | 0.000E+00       | 27.6  | ✓           |            |      |      |       |             |             |             | (9)(23)     |          |  |  |  |  |  |  |  |
| 270 | Q8K1R7    | NEK9   | Serine/threonine-protein kinase Nek9 GN=Nek9 PE=1 SV=2 - [NEK9_MOUSE]                                      | 0 | 1 | 0 | 1 | 0 | 1 | 0 | 1 | 0 | 3   | N/A       | 0.000E+00       | 107   | ✓           |            |      |      |       | ✓           |             |             | (9)(23)     |          |  |  |  |  |  |  |  |
| 271 | Q9JIF7    | COPB   | Coatamer subunit beta GN=Copb1 PE=1 SV=1 - [COPB_MOUSE]                                                    | 0 | 1 | 0 | 1 | 0 | 1 | 0 | 1 | 0 | 3   | N/A       | 0.000E+00       | 107   | ✓           |            |      |      |       |             | ✓           |             | (9)(14)(23) |          |  |  |  |  |  |  |  |
| 272 | Q91YS8    | KCC1A  | Calcium/calmodulin-dependent protein kinase type 1 GN=Camk1 PE=1 SV=1 - [KCC1A_MOUSE]                      | 0 | 1 | 0 | 1 | 0 | 1 | 0 | 1 | 0 | 3   | N/A       | 0.000E+00       | 41.6  | ✓           |            |      |      | ✓     |             |             |             | (9)         |          |  |  |  |  |  |  |  |
| 273 | Q61164    | CTCF   | Transcriptional repressor CTCF GN=Ctcf PE=1 SV=2 - [CTCF_MOUSE]                                            | 0 | 1 | 0 | 1 | 0 | 1 | 0 | 1 | 0 | 3   | N/A       | 0.000E+00       | 83.7  | ✓           |            |      |      |       |             |             |             | (9)         |          |  |  |  |  |  |  |  |
| 274 | Q3TT92    | Q3TT92 | Dihydropyrimidinase-related protein 3 GN=Dpys3 PE=2 SV=1 - [Q3TT92_MOUSE]                                  | 0 | 1 | 0 | 1 | 0 | 1 | 0 | 1 | 0 | 3   | N/A       | 0.000E+00       | 61.7  | ✓           |            |      |      |       | ✓           |             |             | (9)         |          |  |  |  |  |  |  |  |
| 275 | Q99L53    | SERB   | Phosphoserine phosphatase GN=Psph PE=1 SV=1 - [SERB_MOUSE]                                                 | 0 | 1 | 0 | 1 | 0 | 1 | 0 | 1 | 0 | 3   | N/A       | 0.000E+00       | 25.1  | ✓           |            |      |      | ✓     |             |             |             | (26)        |          |  |  |  |  |  |  |  |
| 276 | Q9QYC0-2  | ADDA   | Isoform 2 of Alpha-adducin GN=Add1 - [ADDA_MOUSE]                                                          | 0 | 1 | 0 | 1 | 0 | 1 | 0 | 1 | 0 | 3   | N/A       | 0.000E+00       | 69.8  | ✓           |            |      |      |       |             |             |             | (23)        |          |  |  |  |  |  |  |  |
| 277 | Q9DBR1-2  | XRN2   | Isoform 2 of 5'-3' exoribonuclease 2 GN=Xrn2 - [XRN2_MOUSE]                                                | 0 | 1 | 0 | 1 | 0 | 1 | 0 | 1 | 0 | 3   | N/A       | 0.000E+00       | 108   | ✓           |            |      |      | ✓     |             |             |             | (23)        |          |  |  |  |  |  |  |  |
| 278 | Q8CIN4    | PAK2   | Serine/threonine-protein kinase PAK 2 GN=Pak2 PE=1 SV=1 - [PAK2_MOUSE]                                     | 0 | 1 | 0 | 1 | 0 | 1 | 0 | 1 | 0 | 3   | N/A       | 0.000E+00       | 57.9  | ✓           |            |      |      |       |             |             |             | (23)        |          |  |  |  |  |  |  |  |
| 279 | Q6P5G6    | UBXN7  | UBX domain-containing protein 7 GN=Ubxn7 PE=1 SV=2 - [UBXN7_MOUSE]                                         | 0 | 1 | 0 | 1 | 0 | 1 | 0 | 1 | 0 | 3   | N/A       | 0.000E+00       | 52.1  | ✓           |            |      |      |       | ✓           |             |             | (23)        |          |  |  |  |  |  |  |  |

|     |           |        |                                                                                                                 |   |    |   |    |   |    |   |    |       |           | GlcNAz                        |                      |                      |                                        |                                                               |      |               |             |                                                       |                                                        |                      |      |  |  |  |  |  |  |
|-----|-----------|--------|-----------------------------------------------------------------------------------------------------------------|---|----|---|----|---|----|---|----|-------|-----------|-------------------------------|----------------------|----------------------|----------------------------------------|---------------------------------------------------------------|------|---------------|-------------|-------------------------------------------------------|--------------------------------------------------------|----------------------|------|--|--|--|--|--|--|
|     |           |        |                                                                                                                 |   |    |   |    |   |    |   |    |       |           | Spectral Counts               |                      |                      |                                        |                                                               |      |               |             |                                                       |                                                        |                      |      |  |  |  |  |  |  |
|     |           |        |                                                                                                                 |   |    |   |    |   |    |   |    |       |           | Ex-<br>peri-<br>ment          | Ex-<br>peri-<br>ment | Ex-<br>peri-<br>ment | Sum                                    | Localization                                                  |      |               |             |                                                       |                                                        |                      |      |  |  |  |  |  |  |
| No. | Accession | Gene   | Description                                                                                                     | - | +  | - | +  | - | +  | - | +  | -     | +         | En-<br>rich-<br>ment<br>Ratio | t-test               | MW<br>[kDa]          | Exclu-<br>sively<br>Intracellu-<br>lar | Exclusively<br>Extracellu-<br>lar, Lyso-<br>somal,<br>Luminal | Both | 6AzGI<br>cNAc | Gal-<br>NAz | Previous O-<br>GlcNAc<br>Proteomics<br>Identification | Previous<br>Mucin<br>Proteomics<br>Identifica-<br>tion |                      |      |  |  |  |  |  |  |
| 280 | Q3UHX0    | NOL8   | Nucleolar protein 8 GN=Nol8 PE=1 SV=2 - [NOL8_MOUSE]                                                            | 0 | 1  | 0 | 1  | 0 | 1  | 0 | 3  | N/A   | 0.000E+0C | 129                           | ✓                    |                      |                                        |                                                               |      |               |             | (23)                                                  |                                                        |                      |      |  |  |  |  |  |  |
| 281 | P46061    | RAGP1  | Ran GTPase-activating protein 1 GN=Rangap1 PE=1 SV=2 - [RAGP1_MOUSE]                                            | 0 | 1  | 0 | 1  | 0 | 1  | 0 | 3  | N/A   | 0.000E+0C | 63.5                          | ✓                    |                      |                                        |                                                               |      |               |             | (23)                                                  |                                                        |                      |      |  |  |  |  |  |  |
| 282 | O08997    | ATOX1  | Copper transport protein ATOX1 GN=Atox1 PE=2 SV=1 - [ATOX1_MOUSE]                                               | 0 | 1  | 0 | 1  | 0 | 1  | 0 | 3  | N/A   | 0.000E+0C | 7.3                           | ✓                    |                      |                                        |                                                               |      |               |             | (23)                                                  |                                                        |                      |      |  |  |  |  |  |  |
| 283 | D3YUC9    | D3YUC9 | Methionine-R-sulfoxide reductase B3, mitochondrial GN=Msrb3 PE=4 SV=1 - [D3YUC9_MOUSE]                          | 0 | 1  | 0 | 1  | 0 | 1  | 0 | 3  | N/A   | 0.000E+0C | 12.1                          | ✓                    |                      |                                        |                                                               |      |               |             |                                                       |                                                        |                      |      |  |  |  |  |  |  |
| 284 | Q9JLJ5    | ELOV1  | Elongation of very long chain fatty acids protein 1 GN=Elov1 PE=2 SV=1 - [ELOV1_MOUSE]                          | 0 | 1  | 0 | 1  | 0 | 1  | 0 | 3  | N/A   | 0.000E+0C | 32.7                          |                      |                      |                                        |                                                               | ✓    | ✓             | ✓           |                                                       |                                                        |                      |      |  |  |  |  |  |  |
| 285 | P46978    | STT3A  | Dolichyl-diphosphooligosaccharide--protein glycosyltransferase subunit STT3A GN=Stt3a PE=1 SV=1 - [STT3A_MOUSE] | 0 | 1  | 0 | 1  | 0 | 1  | 0 | 3  | N/A   | 0.000E+0C | 80.5                          |                      |                      |                                        |                                                               |      | ✓             |             |                                                       |                                                        |                      |      |  |  |  |  |  |  |
| 286 | P14719-2  | ILRL1  | Isoform B of Interleukin-1 receptor-like 1 GN=Il1r1 - [ILRL1_MOUSE]                                             | 0 | 1  | 0 | 1  | 0 | 1  | 0 | 3  | N/A   | 0.000E+0C | 38.5                          |                      |                      |                                        |                                                               | ✓    |               |             |                                                       |                                                        |                      |      |  |  |  |  |  |  |
| 287 | Q9CR51    | VATG1  | V-type proton ATPase subunit G 1 GN=Atp6v1g1 PE=2 SV=3 - [VATG1_MOUSE]                                          | 0 | 1  | 0 | 1  | 0 | 1  | 0 | 3  | N/A   | 0.000E+0C | 13.7                          | ✓                    |                      |                                        |                                                               |      |               | ✓           |                                                       |                                                        |                      |      |  |  |  |  |  |  |
| 288 | Q60929-2  | MEF2A  | Isoform 2 of Myocyte-specific enhancer factor 2A GN=Mef2a - [MEF2A_MOUSE]                                       | 0 | 1  | 0 | 1  | 0 | 1  | 0 | 3  | N/A   | 0.000E+0C | 52.6                          | ✓                    |                      |                                        |                                                               |      |               |             | ✓                                                     |                                                        |                      |      |  |  |  |  |  |  |
| 289 | Q5SWD9-2  | TSR1   | Isoform 2 of Pre-rRNA-processing protein TSR1 homolog GN=Tsr1 - [TSR1_MOUSE]                                    | 0 | 1  | 0 | 1  | 0 | 1  | 0 | 3  | N/A   | 0.000E+0C | 78.4                          | ✓                    |                      |                                        |                                                               |      |               |             |                                                       |                                                        |                      |      |  |  |  |  |  |  |
| 290 | Q3TZX8-3  | NOL9   | Isoform 3 of Polynucleotide 5'-hydroxyl-kinase NOL9 GN=Nol9 - [NOL9_MOUSE]                                      | 0 | 1  | 0 | 1  | 0 | 1  | 0 | 3  | N/A   | 0.000E+0C | 70.9                          | ✓                    |                      |                                        |                                                               |      |               |             | ✓                                                     |                                                        |                      |      |  |  |  |  |  |  |
| 291 | J3JS94    | J3JS94 | L antigen family member 3 GN=Lage3 PE=4 SV=1 - [J3JS94_MOUSE]                                                   | 0 | 1  | 0 | 1  | 0 | 1  | 0 | 3  | N/A   | 0.000E+0C | 11.6                          | ✓                    |                      |                                        |                                                               |      |               |             | ✓                                                     |                                                        |                      |      |  |  |  |  |  |  |
| 292 | A2AG83    | A2AG83 | 26S proteasome non-ATPase regulatory subunit 10 GN=Psm10 PE=4 SV=1 - [A2AG83_MOUSE]                             | 0 | 1  | 0 | 1  | 0 | 1  | 0 | 3  | N/A   | 0.000E+0C | 16.2                          | ✓                    |                      |                                        |                                                               |      |               |             | ✓                                                     |                                                        |                      |      |  |  |  |  |  |  |
| 293 | F8WGW3    | F8WGW3 | S1 RNA-binding domain-containing protein 1 GN=Srb1 PE=4 SV=1 - [F8WGW3_MOUSE]                                   | 0 | 1  | 0 | 1  | 0 | 1  | 0 | 3  | N/A   | 0.000E+0C | 110                           |                      |                      |                                        |                                                               |      |               |             |                                                       |                                                        |                      |      |  |  |  |  |  |  |
| 294 | O54931-2  | AKAP2  | Isoform 2 of A-kinase anchor protein 2 GN=Akap2 - [AKAP2_MOUSE]                                                 | 0 | 15 | 1 | 17 | 0 | 17 | 1 | 49 | 49.00 | 2.785E-05 | 97.1                          | ✓                    |                      |                                        |                                                               |      |               |             | ✓                                                     | ✓                                                      | (9)(23)(26)          |      |  |  |  |  |  |  |
| 295 | Q6DFW4    | NOP58  | Nucleolar protein 58 GN=Nop58 PE=1 SV=1 - [NOP58_MOUSE]                                                         | 1 | 13 | 0 | 15 | 0 | 14 | 1 | 42 | 42.00 | 3.344E-05 | 60.3                          | ✓                    |                      |                                        |                                                               |      |               |             | ✓                                                     | ✓                                                      | (9)(23)(26)          |      |  |  |  |  |  |  |
| 296 | Q8BFW7    | LPP    | Lipoma-preferred partner homolog GN=Lpp PE=1 SV=1 - [LPP_MOUSE]                                                 | 0 | 11 | 1 | 15 | 0 | 14 | 1 | 40 | 40.00 | 4.786E-04 | 65.8                          | ✓                    |                      |                                        |                                                               |      |               |             | ✓                                                     | ✓                                                      | (9)(20)(23)(26) (16) |      |  |  |  |  |  |  |
| 297 | P80314    | TCPB   | T-complex protein 1 subunit beta GN=Cct2 PE=1 SV=4 - [TCPB_MOUSE]                                               | 1 | 10 | 0 | 9  | 0 | 19 | 1 | 38 | 38.00 | 1.819E-02 | 57.4                          | ✓                    |                      |                                        |                                                               |      |               |             | ✓                                                     |                                                        | (5)(26)              |      |  |  |  |  |  |  |
| 298 | E9PVC5    | E9PVC5 | Eukaryotic translation initiation factor 4 gamma 1 GN=Eif4g1 PE=4 SV=1 - [E9PVC5_MOUSE]                         | 0 | 9  | 1 | 11 | 0 | 12 | 1 | 32 | 32.00 | 3.937E-04 | 175                           | ✓                    |                      |                                        |                                                               |      |               |             | ✓                                                     | ✓                                                      | (9)(12)              |      |  |  |  |  |  |  |
| 299 | Q61033    | LAP2A  | Lamina-associated polypeptide 2, isoforms alpha/zeta GN=Tmpo PE=1 SV=4 - [LAP2A_MOUSE]                          | 1 | 11 | 0 | 8  | 0 | 13 | 1 | 32 | 32.00 | 2.274E-03 | 75.1                          | ✓                    |                      |                                        |                                                               |      |               |             | ✓                                                     | ✓                                                      | (23)(26)             |      |  |  |  |  |  |  |
| 300 | P60335    | PCBP1  | Poly(rC)-binding protein 1 GN=Pcbp1 PE=1 SV=1 - [PCBP1_MOUSE]                                                   | 0 | 10 | 1 | 10 | 0 | 11 | 1 | 31 | 31.00 | 2.920E-05 | 37.5                          | ✓                    |                      |                                        |                                                               |      |               |             | ✓                                                     | ✓                                                      | (9)(14)(23)(26)      |      |  |  |  |  |  |  |
| 301 | P25206    | MCM3   | DNA replication licensing factor MCM3 GN=Mcm3 PE=1 SV=2 - [MCM3_MOUSE]                                          | 0 | 9  | 1 | 11 | 0 | 10 | 1 | 30 | 30.00 | 1.315E-04 | 91.5                          | ✓                    |                      |                                        |                                                               |      |               |             | ✓                                                     |                                                        | (9)(23)              |      |  |  |  |  |  |  |
| 302 | Q9D0E1-2  | HNRPM  | Isoform 2 of Heterogeneous nuclear ribonucleoprotein M GN=Hnrpm - [HNRPM_MOUSE]                                 | 1 | 14 | 1 | 17 | 0 | 26 | 2 | 57 | 28.50 | 7.165E-03 | 73.7                          | ✓                    |                      |                                        |                                                               |      |               |             | ✓                                                     |                                                        | (9)(23)              |      |  |  |  |  |  |  |
| 303 | P70698    | PYRG1  | CTP synthase 1 GN=Ctps1 PE=1 SV=2 - [PYRG1_MOUSE]                                                               | 1 | 8  | 0 | 6  | 0 | 10 | 1 | 24 | 24.00 | 3.098E-03 | 66.6                          | ✓                    |                      |                                        |                                                               |      |               |             | ✓                                                     |                                                        | (23)(26)             |      |  |  |  |  |  |  |
| 304 | Q62167    | DDX3X  | ATP-dependent RNA helicase DDX3X GN=Ddx3x PE=1 SV=3 - [DDX3X_MOUSE]                                             | 0 | 6  | 1 | 5  | 0 | 11 | 1 | 22 | 22.00 | 2.061E-02 | 73.1                          | ✓                    |                      |                                        |                                                               |      |               |             | ✓                                                     |                                                        | (23)(26)             |      |  |  |  |  |  |  |
| 305 | Q60598    | SRC8   | Src substrate cortactin GN=Cttn PE=1 SV=2 - [SRC8_MOUSE]                                                        | 0 | 8  | 1 | 6  | 0 | 8  | 1 | 22 | 22.00 | 7.163E-04 | 61.2                          | ✓                    |                      |                                        |                                                               |      |               |             | ✓                                                     |                                                        | (20)(26)             |      |  |  |  |  |  |  |
| 306 | Q8VHR5    | P66B   | Transcriptional repressor p66-beta GN=Gatad2b PE=1 SV=1 - [P66B_MOUSE]                                          | 0 | 5  | 1 | 8  | 0 | 8  | 1 | 21 | 21.00 | 3.198E-03 | 65.4                          | ✓                    |                      |                                        |                                                               |      |               |             | ✓                                                     |                                                        | (1)(12)(20)(23)      |      |  |  |  |  |  |  |
| 307 | Q80X90    | FLNB   | Filamin-B GN=Flnb PE=1 SV=3 - [FLNB_MOUSE]                                                                      | 0 | 4  | 1 | 8  | 0 | 8  | 1 | 20 | 20.00 | 9.969E-03 | 278                           | ✓                    |                      |                                        |                                                               |      |               |             | ✓                                                     |                                                        | (23)(26)             |      |  |  |  |  |  |  |
| 308 | Q91VI7    | RINI   | Ribonuclease inhibitor GN=Rnh1 PE=1 SV=1 - [RINI_MOUSE]                                                         | 0 | 6  | 1 | 5  | 0 | 8  | 1 | 19 | 19.00 | 3.126E-03 | 49.8                          | ✓                    |                      |                                        |                                                               |      |               |             | ✓                                                     |                                                        | (23)                 |      |  |  |  |  |  |  |
| 309 | Q99K70    | RRAGC  | Ras-related GTP-binding protein C GN=Rragc PE=2 SV=1 - [RRAGC_MOUSE]                                            | 0 | 6  | 1 | 4  | 0 | 8  | 1 | 18 | 18.00 | 9.206E-03 | 44.1                          | ✓                    |                      |                                        |                                                               |      |               |             | ✓                                                     |                                                        | (23)                 |      |  |  |  |  |  |  |
| 310 | Q9CQX2    | CYB5B  | Cytochrome b5 type B GN=Cyb5b PE=1 SV=1 - [CYB5B_MOUSE]                                                         | 1 | 7  | 0 | 5  | 0 | 5  | 1 | 17 | 17.00 | 2.019E-03 | 16.3                          | ✓                    |                      |                                        |                                                               |      |               |             | ✓                                                     |                                                        | (26)                 |      |  |  |  |  |  |  |
| 311 | Q61699-2  | HS105  | Isoform HSP105-beta of Heat shock protein 105 kDa GN=Hsph1 - [HS105_MOUSE]                                      | 0 | 19 | 3 | 10 | 0 | 21 | 3 | 50 | 16.67 | 1.132E-02 | 91.6                          | ✓                    |                      |                                        |                                                               |      |               |             | ✓                                                     |                                                        | (5)(9)(23)           |      |  |  |  |  |  |  |
| 312 | Q8CI51    | PDLI5  | PDZ and LIM domain protein 5 GN=Pdlm5 PE=1 SV=4 - [PDLI5_MOUSE]                                                 | 0 | 5  | 2 | 13 | 0 | 15 | 2 | 33 | 16.50 | 2.980E-02 | 63.3                          | ✓                    |                      |                                        |                                                               |      |               |             | ✓                                                     |                                                        | (1)(9)(23)(26)       |      |  |  |  |  |  |  |
| 313 | Q60854    | SPB6   | Serpin B6 GN=Serpinb6 PE=2 SV=1 - [SPB6_MOUSE]                                                                  | 0 | 5  | 1 | 5  | 0 | 6  | 1 | 16 | 16.00 | 4.472E-04 | 42.6                          | ✓                    |                      |                                        |                                                               |      |               |             | ✓                                                     |                                                        | (26)                 |      |  |  |  |  |  |  |
| 314 | Q61029-3  | LAP2B  | Isoform Epsilon of Lamina-associated polypeptide 2, isoforms beta/delta/epsilon/gamma GN=Tm1 - [LAP2B_MOUSE]    | 1 | 9  | 1 | 10 | 0 | 11 | 2 | 30 | 15.00 | 1.510E-04 | 46.0                          | ✓                    |                      |                                        |                                                               |      |               |             | ✓                                                     | ✓                                                      | (26)                 |      |  |  |  |  |  |  |
| 315 | P06151    | LDHA   | L-lactate dehydrogenase A chain GN=Ldha PE=1 SV=3 - [LDHA_MOUSE]                                                | 1 | 12 | 1 | 15 | 1 | 15 | 3 | 42 | 14.00 | 2.020E-04 | 36.5                          | ✓                    |                      |                                        |                                                               |      |               |             | ✓                                                     | ✓                                                      | (6)(23)(24)(26) (17) |      |  |  |  |  |  |  |
| 316 | Q61990    | PCBP2  | Poly(rC)-binding protein 2 GN=Pcbp2 PE=1 SV=1 - [PCBP2_MOUSE]                                                   | 0 | 4  | 1 | 5  | 0 | 5  | 1 | 14 | 14.00 | 7.779E-04 | 38.2                          | ✓                    |                      |                                        |                                                               |      |               |             | ✓                                                     | ✓                                                      | (5)(14)(26) (17)     |      |  |  |  |  |  |  |
| 317 | Q501J6    | DDX17  | Probable ATP-dependent RNA helicase DDX17 GN=Ddx17 PE=2 SV=1 - [DDX17_MOUSE]                                    | 0 | 4  | 0 | 4  | 1 | 5  | 1 | 13 | 13.00 | 1.058E-03 | 72.4                          | ✓                    |                      |                                        |                                                               |      |               |             | ✓                                                     | ✓                                                      | (5)(9)(23)(26)       |      |  |  |  |  |  |  |
| 318 | A2AFJ1    | A2AFJ1 | Histone-binding protein RBBP7 GN=Rbbp7 PE=4 SV=1 - [A2AFJ1_MOUSE]                                               | 0 | 3  | 1 | 3  | 0 | 6  | 1 | 12 | 12.00 | 2.539E-02 | 46.9                          | ✓                    |                      |                                        |                                                               |      |               |             | ✓                                                     |                                                        | (26)                 |      |  |  |  |  |  |  |
| 319 | P16045    | LEG1   | Galectin-1 GN=Lgals1 PE=1 SV=3 - [LEG1_MOUSE]                                                                   | 1 | 32 | 2 | 25 | 3 | 13 | 6 | 70 | 11.67 | 1.870E-02 | 14.9                          |                      |                      |                                        |                                                               | ✓    | ✓             |             |                                                       | (23)                                                   | (17)                 |      |  |  |  |  |  |  |
| 320 | Q3U0V1    | FUBP2  | Far upstream element-binding protein 2 GN=Khrp PE=1 SV=2 - [FUBP2_MOUSE]                                        | 1 | 18 | 2 | 19 | 2 | 17 | 5 | 54 | 10.80 | 1.647E-05 | 76.7                          | ✓                    |                      |                                        |                                                               |      |               |             | ✓                                                     | ✓                                                      | (14)(23)(26)         |      |  |  |  |  |  |  |
| 321 | Q9JIF0-3  | ANM1   | Isoform 3 of Protein arginine N-methyltransferase 1 GN=Prmt1 - [ANM1_MOUSE]                                     | 0 | 10 | 2 | 9  | 1 | 13 | 3 | 32 | 10.67 | 1.921E-03 | 39.6                          | ✓                    |                      |                                        |                                                               |      |               |             | ✓                                                     |                                                        | (26)                 | (17) |  |  |  |  |  |  |

| No  | Accession | Gene   | Description                                                                                                      | GlcNAz          |    |               |    |               |    |     |     |       |           | Enrichment Ratio | t-test | MW [kDa] | Localization  |                                               |      |           |                                | Previous O-GlcNAc Proteomics | Previous Mucin Proteomics Identification |
|-----|-----------|--------|------------------------------------------------------------------------------------------------------------------|-----------------|----|---------------|----|---------------|----|-----|-----|-------|-----------|------------------|--------|----------|---------------|-----------------------------------------------|------|-----------|--------------------------------|------------------------------|------------------------------------------|
|     |           |        |                                                                                                                  | Spectral Counts |    |               |    |               |    |     |     |       |           |                  |        |          | Intracellular | Exclusively Extracellular, Lysosomal, Luminal | Both | 6AzGlcNAc | GalNAz                         |                              |                                          |
|     |           |        |                                                                                                                  | Ex-periment 1   |    | Ex-periment 2 |    | Ex-periment 3 |    | Sum |     |       |           |                  |        |          |               |                                               |      |           |                                |                              |                                          |
|     |           |        |                                                                                                                  | -               | +  | -             | +  | -             | +  |     | -   | +     |           |                  |        |          |               |                                               |      |           |                                |                              |                                          |
| 322 | Q9WUM4    | COR1C  | Coronin-1C GN=Coro1c PE=1 SV=2 - [COR1C_MOUSE]                                                                   | 0               | 6  | 2             | 8  | 0             | 6  | 2   | 20  | 10.00 | 3.126E-03 | 53.1             | ✓      |          |               |                                               |      |           | (14)(26)                       |                              |                                          |
| 323 | D3Z5M2    | D3Z5M2 | Protein Gm10110 GN=Gm10110 PE=4 SV=1 - [D3Z5M2_MOUSE]                                                            | 0               | 6  | 2             | 5  | 0             | 8  | 2   | 19  | 9.50  | 6.859E-03 | 67.7             |        |          |               |                                               |      |           |                                |                              |                                          |
| 324 | Q91V92    | ACLY   | ATP-citrate synthase GN=Acly PE=1 SV=1 - [ACLY_MOUSE]                                                            | 1               | 2  | 0             | 3  | 0             | 4  | 1   | 9   | 9.00  | 1.613E-02 | 120              | ✓      |          |               |                                               |      |           | (9)(14)(23)(26)                | (17)                         |                                          |
| 325 | Q11011    | PSA    | Puromycin-sensitive aminopeptidase GN=Npepps PE=1 SV=2 - [PSA_MOUSE]                                             | 0               | 3  | 1             | 3  | 0             | 3  | 1   | 9   | 9.00  | 1.324E-03 | 103              | ✓      |          |               |                                               |      |           | (5)(23)                        |                              |                                          |
| 326 | Q8BGQ7    | SYAC   | Alanine--tRNA ligase, cytoplasmic GN=Aars PE=1 SV=1 - [SYAC_MOUSE]                                               | 1               | 8  | 1             | 7  | 1             | 11 | 3   | 26  | 8.67  | 3.098E-03 | 107              | ✓      |          |               |                                               |      |           | (23)(26)                       | (17)                         |                                          |
| 327 | Q3UPL0-2  | SC31A  | Isoform 2 of Protein transport protein Sec31A GN=Sec31a - [SC31A_MOUSE]                                          | 1               | 8  | 2             | 8  | 0             | 10 | 3   | 26  | 8.67  | 9.640E-04 | 130              | ✓      |          |               |                                               |      |           | (5)(19)(26)                    |                              |                                          |
| 328 | Q791V5    | MTCH2  | Mitochondrial carrier homolog 2 GN=Mtch2 PE=1 SV=1 - [MTCH2_MOUSE]                                               | 1               | 5  | 1             | 6  | 0             | 6  | 2   | 17  | 8.50  | 4.472E-04 | 33.5             | ✓      |          |               |                                               |      |           | (23)                           |                              |                                          |
| 329 | P68254-2  | 1433T  | Isoform 2 of 14-3-3 protein theta GN=Ywhaq - [1433T_MOUSE]                                                       | 1               | 13 | 1             | 14 | 3             | 15 | 5   | 42  | 8.40  | 1.517E-04 | 27.7             | ✓      |          |               |                                               |      |           | (5)(8)(9)(23)(26)              | (17)                         |                                          |
| 330 | Q61RU2    | TPM4   | Tropomyosin alpha-4 chain GN=Tpm4 PE=2 SV=3 - [TPM4_MOUSE]                                                       | 1               | 8  | 1             | 8  | 1             | 9  | 3   | 25  | 8.33  | 2.526E-05 | 28.5             | ✓      |          |               |                                               |      |           | (9)(23)(26)                    |                              |                                          |
| 331 | Q8BGJ5    | Q8BGJ5 | MCG13402, isoform CRA_a GN=Ptpb1 PE=2 SV=1 - [Q8BGJ5_MOUSE]                                                      | 0               | 7  | 1             | 9  | 2             | 8  | 3   | 24  | 8.00  | 1.017E-03 | 56.9             | ✓      |          |               |                                               |      |           | (26)                           |                              |                                          |
| 332 | A1BN54    | A1BN54 | Alpha actinin 1a GN=Actn1 PE=2 SV=1 - [A1BN54_MOUSE]                                                             | 0               | 16 | 3             | 17 | 4             | 20 | 7   | 53  | 7.57  | 8.362E-04 | 103              | ✓      |          |               |                                               |      |           | (26)                           |                              |                                          |
| 333 | Q62523    | ZYX    | Zyxin GN=Zyx PE=1 SV=2 - [ZYX_MOUSE]                                                                             | 0               | 4  | 2             | 5  | 0             | 6  | 2   | 15  | 7.50  | 7.966E-03 | 60.5             | ✓      |          |               |                                               |      |           | (1)(9)(23)(26)                 |                              |                                          |
| 334 | Q61024    | ASNS   | Asparagine synthetase [glutamine-hydrolyzing] GN=Asns PE=2 SV=3 - [ASNS_MOUSE]                                   | 0               | 19 | 3             | 17 | 4             | 16 | 7   | 52  | 7.43  | 5.486E-04 | 64.2             | ✓      |          |               |                                               |      |           | (23)(26)                       |                              |                                          |
| 335 | Q8BGD9    | IF4B   | Eukaryotic translation initiation factor 4B GN=Eif4b PE=1 SV=1 - [IF4B_MOUSE]                                    | 2               | 13 | 2             | 10 | 1             | 14 | 5   | 37  | 7.40  | 1.026E-03 | 68.8             | ✓      |          |               |                                               |      |           | (9)(26)                        |                              |                                          |
| 336 | Q921F2    | TADBP  | TAR DNA-binding protein 43 GN=Tardbp PE=1 SV=1 - [TADBP_MOUSE]                                                   | 0               | 2  | 1             | 2  | 0             | 3  | 1   | 7   | 7.00  | 1.324E-02 | 44.5             | ✓      |          |               |                                               |      |           | (9)(14)(26)                    |                              |                                          |
| 337 | P14733    | LMNB1  | Lamin-B1 GN=Lmnb1 PE=1 SV=3 - [LMNB1_MOUSE]                                                                      | 0               | 2  | 1             | 2  | 0             | 3  | 1   | 7   | 7.00  | 1.324E-02 | 66.7             | ✓      |          |               |                                               |      |           | (23)                           |                              |                                          |
| 338 | A2AL12    | A2AL12 | Heterogeneous nuclear ribonucleoprotein A3 GN=Hnrnpa3 PE=4 SV=1 - [A2AL12_MOUSE]                                 | 4               | 19 | 3             | 24 | 3             | 22 | 10  | 65  | 6.50  | 2.511E-04 | 34.5             | ✓      |          |               |                                               |      |           | (5)(26)                        |                              |                                          |
| 339 | P68510    | 1433F  | 14-3-3 protein eta GN=Ywhah PE=1 SV=2 - [1433F_MOUSE]                                                            | 0               | 2  | 0             | 2  | 1             | 2  | 1   | 6   | 6.00  | 7.490E-03 | 28.2             |        |          |               |                                               |      |           |                                |                              |                                          |
| 340 | P17751    | TPIS   | Triosephosphate isomerase GN=Tipi PE=1 SV=4 - [TPIS_MOUSE]                                                       | 2               | 11 | 3             | 10 | 1             | 14 | 6   | 35  | 5.83  | 1.921E-03 | 32.2             | ✓      |          |               |                                               |      |           | (5)(19)(23)(26)                | (17)                         |                                          |
| 341 | Q8VDM4    | PSMD2  | 26S proteasome non-ATPase regulatory subunit 2 GN=Psm2 PE=1 SV=1 - [PSMD2_MOUSE]                                 | 0               | 6  | 3             | 5  | 0             | 6  | 3   | 17  | 5.67  | 1.145E-02 | 100              | ✓      |          |               |                                               |      |           | (19)(23)                       |                              |                                          |
| 342 | E9QAT0    | E9QAT0 | Fragile X mental retardation protein 1 homolog GN=Fmr1 PE=4 SV=1 - [E9QAT0_MOUSE]                                | 1               | 4  | 1             | 3  | 0             | 4  | 2   | 11  | 5.50  | 3.126E-03 | 66.1             |        |          |               |                                               |      |           | (14)(19)(23)(26)               |                              |                                          |
| 343 | P18760    | COF1   | Cofilin-1 GN=Cfl1 PE=1 SV=3 - [COF1_MOUSE]                                                                       | 3               | 5  | 2             | 11 | 1             | 14 | 6   | 30  | 5.00  | 4.179E-02 | 18.5             | ✓      |          |               |                                               |      |           | (14)(23)(26)                   |                              |                                          |
| 344 | P07742    | RIR1   | Ribonucleoside-diphosphate reductase large subunit GN=Rrm1 PE=1 SV=2 - [RIR1_MOUSE]                              | 0               | 2  | 1             | 2  | 0             | 1  | 1   | 5   | 5.00  | 4.742E-02 | 90.2             | ✓      |          |               |                                               |      |           | (14)(23)(26)                   |                              |                                          |
| 345 | J3QPE8    | J3QPE8 | MCG16555 GN=Vdac3-ps1 PE=4 SV=1 - [J3QPE8_MOUSE]                                                                 | 4               | 11 | 1             | 10 | 2             | 12 | 7   | 33  | 4.71  | 1.193E-03 | 30.7             | ✓      |          |               |                                               |      |           | (5)(8)(14)(23)(26)             |                              |                                          |
| 346 | P61979-3  | HNRPK  | Isoform 3 of Heterogeneous nuclear ribonucleoprotein K GN=Hnrpk - [HNRPK_MOUSE]                                  | 5               | 15 | 3             | 11 | 1             | 15 | 9   | 41  | 4.56  | 3.772E-03 | 48.5             | ✓      |          |               |                                               |      |           | (5)                            |                              |                                          |
| 347 | E9Q7H5    | E9Q7H5 | Uncharacterized protein GN=Gm8991 PE=4 SV=1 - [E9Q7H5_MOUSE]                                                     | 5               | 15 | 3             | 18 | 3             | 17 | 11  | 50  | 4.55  | 2.992E-04 | 32.6             | ✓      |          |               |                                               |      |           |                                |                              |                                          |
| 348 | G3UX26    | G3UX26 | Voltage-dependent anion-selective channel protein 2 (Fragment) GN=Vdac2 PE=4 SV=1 - [G3UX26_MOUSE]               | 5               | 18 | 3             | 18 | 4             | 18 | 12  | 54  | 4.50  | 1.716E-05 | 30.4             | ✓      |          |               |                                               |      |           |                                |                              |                                          |
| 349 | Q9CQ65    | MTAP   | S-methyl-5'-thioadenosine phosphorylase GN=Mtap PE=2 SV=1 - [MTAP_MOUSE]                                         | 2               | 12 | 3             | 13 | 3             | 11 | 8   | 36  | 4.50  | 1.510E-04 | 31.0             | ✓      |          |               |                                               |      |           | (23)(26)                       | (17)                         |                                          |
| 350 | Q9WVA4    | TAGL2  | Transgelin-2 GN=Tagln2 PE=1 SV=4 - [TAGL2_MOUSE]                                                                 | 0               | 3  | 2             | 3  | 0             | 3  | 2   | 9   | 4.50  | 2.490E-02 | 22.4             | ✓      |          |               |                                               |      |           | (23)(26)                       |                              |                                          |
| 351 | Q60749    | KHDR1  | KH domain-containing, RNA-binding, signal transduction-associated protein 1 GN=Khdrbs1 PE=1 SV=1 - [KHDR1_MOUSE] | 1               | 6  | 1             | 4  | 1             | 3  | 3   | 13  | 4.33  | 1.944E-02 | 48.3             | ✓      |          |               |                                               |      |           | (9)(14)(26)                    |                              |                                          |
| 352 | P10107    | ANXA1  | Annexin A1 GN=Anxa1 PE=1 SV=2 - [ANXA1_MOUSE]                                                                    | 5               | 21 | 5             | 21 | 6             | 23 | 16  | 65  | 4.06  | 2.566E-05 | 38.7             | ✓      |          |               |                                               |      |           | (9)(26)                        | (17)                         |                                          |
| 353 | P08752    | GNAI2  | Guanine nucleotide-binding protein G(i) subunit alpha-2 GN=Gnai2 PE=1 SV=5 - [GNAI2_MOUSE]                       | 1               | 3  | 1             | 4  | 1             | 4  | 3   | 11  | 3.67  | 1.324E-03 | 40.5             | ✓      |          |               |                                               |      |           | (20)(26)                       |                              |                                          |
| 354 | P58252    | EF2    | Elongation factor 2 GN=Eef2 PE=1 SV=2 - [EF2_MOUSE]                                                              | 7               | 21 | 4             | 18 | 7             | 26 | 18  | 65  | 3.61  | 3.501E-03 | 95.3             | ✓      |          |               |                                               |      |           | (5)(8)(9)(14)(23)(26)          | (17)                         |                                          |
| 355 | P10605    | CATB   | Cathepsin B GN=Ctsb PE=1 SV=2 - [CATB_MOUSE]                                                                     | 1               | 4  | 1             | 5  | 2             | 5  | 4   | 14  | 3.50  | 2.111E-03 | 37.3             |        |          |               |                                               |      |           | (26)                           | (17)                         |                                          |
| 356 | P07356    | ANXA2  | Annexin A2 GN=Anxa2 PE=1 SV=2 - [ANXA2_MOUSE]                                                                    | 3               | 17 | 7             | 19 | 5             | 16 | 15  | 52  | 3.47  | 1.056E-03 | 38.7             | ✓      |          |               |                                               |      |           | (8)(9)(23)(26)                 | (17)                         |                                          |
| 357 | B7FAU9    | B7FAU9 | Filamin, alpha GN=Flna PE=4 SV=1 - [B7FAU9_MOUSE]                                                                | 2               | 14 | 8             | 15 | 5             | 21 | 15  | 50  | 3.33  | 1.388E-02 | 280              | ✓      |          |               |                                               |      |           | (9)(26)                        |                              |                                          |
| 358 | P46935    | NEDD4  | E3 ubiquitin-protein ligase NEDD4 GN=Nedd4 PE=1 SV=3 - [NEDD4_MOUSE]                                             | 8               | 27 | 10            | 30 | 8             | 28 | 26  | 85  | 3.27  | 5.867E-05 | 103              | ✓      |          |               |                                               |      |           | (1)(20)(26)                    |                              |                                          |
| 359 | P16858    | G3P    | Glyceraldehyde-3-phosphate dehydrogenase GN=Gapdh PE=1 SV=2 - [G3P_MOUSE]                                        | 20              | 63 | 21            | 62 | 20            | 61 | 61  | 186 | 3.05  | 3.925E-07 | 35.8             | ✓      |          |               |                                               |      |           | (1)(2)(4)(6)(8)(9)(23)(24)(26) |                              |                                          |

## References:

- 1 Alfaro, J. F. et al. Tandem mass spectrometry identifies many mouse brain O-GlcNAcylated proteins including EGF domain-specific O-GlcNAc transferase targets. *Proc Natl Acad Sci USA* 109, 7280–7285 (2012).
- 2 Boyce, M. et al. Metabolic cross-talk allows labeling of O-linked (beta)-N-acetylglucosamine-modified proteins via the N-acetylgalactosamine salvage pathway. *Proc Natl Acad Sci USA* 108, 3141–3146 (2011).
- 3 Carlsson, S. R., Lycksell, P. O. & Fukuda, M. Assignment of O-glycan attachment sites to the hinge-like regions of human lysosomal membrane glycoproteins lamp-1 and lamp-2. *Arch. Biochem. Biophys.* 304, 65–73 (1993).
- 4 Cieniewski-Bernard, C. Identification of O-linked N-Acetylglucosamine Proteins in Rat Skeletal Muscle Using Two-dimensional Gel Electrophoresis and Mass Spectrometry. *Mol Cell Proteomics* 3, 577–585 (2004).
- 5 Clark, P. M. et al. Direct In-Gel Fluorescence Detection and Cellular Imaging of O-GlcNAc-Modified Proteins. *J Am Chem Soc* 130, 11576–11577 (2008).
- 6 Dehennaut, V. et al. Identification of structural and functional O-linked N-acetylglucosamine-bearing proteins in *Xenopus laevis* oocyte. *Mol Cell Proteomics* 7, 2229–2245 (2008).
- 7 Fujiwara, S., Shinkai, H., Mann, K. & Timpl, R. Structure and Localization. *Matrix Collagen and Related Research* 13, 215–222 (1993).
- 8 Gurcel, C. et al. Identification of new O-GlcNAc modified proteins using a click-chemistry-based tagging. *Anal Bioanal Chem* 390, 2089–2097 (2008).
- 9 Hahne, H. et al. Proteome Wide Purification and Identification of O-GlcNAc-Modified Proteins Using Click Chemistry and Mass Spectrometry. *J Proteome Res* 12, 927–936 (2013).
- 10 Hubbard, S. C., Boyce, M., McVaugh, C. T., Peehl, D. M. & Bertozzi, C. R. Cell surface glycoproteomic analysis of prostate cancer-derived PC-3 cells. *Bioorg. Med. Chem. Lett.* 21, 4945–4950 (2011).
- 11 Kaneko, M. et al. Functional sialylated O-glycan to platelet aggregation on Aggrus (T1alpha/Podoplanin) molecules expressed in Chinese hamster ovary cells. *J. Biol. Chem.* 279, 38838–38843 (2004).
- 12 Khidekel, N. et al. Probing the dynamics of O-GlcNAc glycosylation in the brain using quantitative proteomics. *Nat Chem Biol* 3, 339–348 (2007).
- 13 Khidekel, N., Ficarro, S., Peters, E. & Hsieh-Wilson, L. Exploring the O-GlcNAc proteome: direct identification of O-GlcNAc-modified proteins from the brain. *Proc Natl Acad Sci USA* 101, 13132–13137 (2004).
- 14 Nandi, A. et al. Global identification of O-GlcNAc-modified proteins. *Anal Chem* 78, 452–458 (2006).
- 15 Schjoldager, K. T. B. et al. Probing isoform-specific functions of polypeptide GalNAc-transferases using zinc finger nuclease glycoengineered SimpleCells. *Proceedings of the National Academy of Sciences* 109, 9893–9898 (2012).
- 16 Steentoft, C. et al. ResourcePrecision mapping of the human O-GalNAc glycoproteome through SimpleCell technology. *EMBO J.* 32, 1478–1488 (2013).
- 17 Slade, P. G., Hajivandi, M., Bartel, C. M. & Gorfien, S. F. Identifying the CHO secretome using mucin-type O-linked glycosylation and click-chemistry. *J. Proteome Res.* 11, 6175–6186 (2012).
- 18 Sprung, R. et al. Tagging-via-substrate strategy for probing O-GlcNAc modified proteins. *J Proteome Res* 4, 950–957 (2005).
- 19 Teo, C. F. et al. Glycopeptide-specific monoclonal antibodies suggest new roles for O-GlcNAc. *Nat Chem Biol* 6, 338–343 (2010).
- 20 Trinidad, J. C. et al. Global identification and characterization of both O-GlcNAcylation and phosphorylation at the murine synapse. *Mol Cell Proteomics* 11, 215–229 (2012).
- 21 Vosseller, K. et al. O-linked N-acetylglucosamine proteomics of postsynaptic density preparations using lectin weak affinity chromatography and mass spectrometry. *Mol Cell Proteomics* 5, 923–934 (2006).
- 22 Wang, Z. et al. Enrichment and Site Mapping of O-Linked N-Acetylglucosamine by a Combination of Chemical/Enzymatic Tagging, Photochemical Cleavage, and Electron Transfer Dissociation Mass Spectrometry. *Mol Cell Proteomics* 9, 153–160 (2010).
- 23 Wang, Z. et al. Extensive Crosstalk Between O-GlcNAcylation and Phosphorylation Regulates Cytokinesis. *Science Signaling* 3, ra2 (2010).
- 24 Wang, Z., Pandey, A. & Hart, G. W. Dynamic Interplay between O-Linked N-Acetylglucosaminylation and Glycogen Synthase Kinase-3-dependent Phosphorylation. *Mol Cell Proteomics* 6, 1365–1379 (2007).
- 25 Wells, L. et al. Mapping sites of O-GlcNAc modification using affinity tags for serine and threonine post-translational modifications. *Mol Cell Proteomics* 1, 791–804 (2002).
- 26 Zaro, B. W., Yang, Y.-Y., Hang, H. C. & Pratt, M. R. Chemical reporters for fluorescent detection and identification of O-GlcNAc-modified proteins reveal glycosylation of the ubiquitin ligase NEDD4-1. *Proc Natl Acad Sci USA* 108, 8146–8151 (2011).



**Supplementary Table 3.** Proteins identified using GalNAz enrichment. NIH 3T3 were treated in triplicate with either Ac<sub>4</sub>GalNAz (200 μM, +) or Ac<sub>4</sub>GlcNAc (200 μM, -) for 16 hours. At this time the cell lysates were subjected to CuAAC with alkyne-biotin, followed by enrichment with streptavidin beads and on-bead trypsinolysis. Labeled proteins were selected as those that were represented by at least 1 unique-peptide in each Ac<sub>4</sub>GalNAz treated sample, a total of at least 3 spectral-counts from the same three samples, and at least a total of 3 times more spectral counts in the Ac<sub>4</sub>GalNAz treated samples compared to Ac<sub>4</sub>GlcNAc. Blue indicates proteins previously identified in O-GlcNAc proteomic studies, purple indicates proteins identified in both O-GlcNAc and O-linked mucin proteomic studies and red indicates proteins identified in only O-linked mucin proteomic studies. Novel proteins that were identified in this study are indicated in white.

| N<br>o. | Accession | Gene   | Description                                                                                  | GalNAz Spectral Counts |    |               |    |               |    |     |     | Enrichment Ratio | t-test    | MW [kDa] | Localization  |                                               |      |           | Previous O-GlcNAc Proteomics Identification | Previous Mucin Proteomics Identification |        |
|---------|-----------|--------|----------------------------------------------------------------------------------------------|------------------------|----|---------------|----|---------------|----|-----|-----|------------------|-----------|----------|---------------|-----------------------------------------------|------|-----------|---------------------------------------------|------------------------------------------|--------|
|         |           |        |                                                                                              | Ex-periment 1          |    | Ex-periment 2 |    | Ex-periment 3 |    | Sum |     |                  |           |          | Intracellular | Exclusively Extracellular, Lysosomal, Luminal | Both | 6AzGlcNAc |                                             |                                          | GlcNAz |
|         |           |        |                                                                                              | -                      | +  | -             | +  | -             | +  | -   | +   |                  |           |          |               |                                               |      |           |                                             |                                          |        |
| 1       | Q61191    | HCFC1  | Host cell factor 1 GN=Hcfc1 PE=1 SV=2 - [HCFC1_MOUSE]                                        | 0                      | 40 | 0             | 30 | 0             | 34 | 0   | 104 | N/A              | 2.829E-04 | 210      | ✓             |                                               | ✓    | ✓         | (1)(2)(9)(13)(19)(20)(21)(22)(23)(24)(26)   |                                          |        |
| 2       | Q80X50-5  | UBP2L  | Isoform 5 of Ubiquitin-associated protein 2-like GN=Ubp2l - [UBP2L_MOUSE]                    | 0                      | 31 | 0             | 39 | 0             | 33 | 0   | 103 | N/A              | 1.396E-04 | 117      | ✓             |                                               | ✓    | ✓         | (5)(19)(23)(26)                             |                                          |        |
| 3       | Q80X50-2  | UBP2L  | Isoform 2 of Ubiquitin-associated protein 2-like GN=Ubp2l - [UBP2L_MOUSE]                    | 0                      | 30 | 0             | 38 | 0             | 32 | 0   | 100 | N/A              | 1.568E-04 | 107      | ✓             |                                               | ✓    | ✓         | (5)(19)(23)(26)                             |                                          |        |
| 4       | Q8K4Z5    | SF3A1  | Splicing factor 3A subunit 1 GN=Sf3a1 PE=1 SV=1 - [SF3A1_MOUSE]                              | 0                      | 27 | 0             | 31 | 0             | 32 | 0   | 90  | N/A              | 3.964E-05 | 88.5     | ✓             |                                               | ✓    | ✓         | (9)(23)(26)                                 | (17)                                     |        |
| 5       | Q6XLQ8    | Q6XLQ8 | Calumenin GN=Calu PE=2 SV=1 - [Q6XLQ8_MOUSE]                                                 | 0                      | 25 | 0             | 29 | 0             | 28 | 0   | 82  | N/A              | 2.214E-05 | 37.1     |               | ✓                                             | ✓    | ✓         |                                             |                                          |        |
| 6       | O35887    | CALU   | Calumenin GN=Calu PE=1 SV=1 - [CALU_MOUSE]                                                   | 0                      | 25 | 0             | 24 | 0             | 24 | 0   | 73  | N/A              | 2.110E-07 | 37.0     |               | ✓                                             | ✓    | ✓         | (9)(23)                                     | (16)(17)                                 |        |
| 7       | Q7TQH0-2  | ATX2L  | Isoform 2 of Ataxin-2-like protein GN=Atxn2l - [ATX2L_MOUSE]                                 | 0                      | 25 | 0             | 23 | 0             | 24 | 0   | 72  | N/A              | 2.002E-06 | 113      | ✓             |                                               | ✓    | ✓         | (19)(23)                                    |                                          |        |
| 8       | Q9DBR7    | MYPT1  | Protein phosphatase 1 regulatory subunit 12A GN=Ppp1r12a PE=1 SV=2 - [MYPT1_MOUSE]           | 0                      | 22 | 0             | 22 | 0             | 28 | 0   | 72  | N/A              | 2.764E-04 | 115      | ✓             |                                               | ✓    | ✓         | (1)(5)(19)(20)(26)                          |                                          |        |
| 9       | Q6PB44-2  | PTN23  | Isoform 2 of Tyrosine-protein phosphatase non-receptor type 23 GN=Ptpn23 - [PTN23_MOUSE]     | 0                      | 25 | 0             | 25 | 0             | 22 | 0   | 72  | N/A              | 1.788E-05 | 185      | ✓             |                                               | ✓    | ✓         |                                             |                                          |        |
| 10      | Q8CGF7    | TCRG1  | Transcription elongation regulator 1 GN=Tcerg1 PE=1 SV=2 - [TCRG1_MOUSE]                     | 0                      | 24 | 0             | 23 | 0             | 24 | 0   | 71  | N/A              | 2.358E-07 | 124      | ✓             |                                               | ✓    | ✓         | (19)(23)                                    |                                          |        |
| 11      | Q60737    | CSK21  | Casein kinase II subunit alpha GN=Csnk2a1 PE=1 SV=2 - [CSK21_MOUSE]                          | 0                      | 23 | 0             | 22 | 0             | 25 | 0   | 70  | N/A              | 1.213E-05 | 45.1     | ✓             |                                               | ✓    | ✓         | (5)                                         |                                          |        |
| 12      | Q8CH18    | CCAR1  | Cell division cycle and apoptosis regulator protein 1 GN=Ccar1 PE=1 SV=1 - [CCAR1_MOUSE]     | 0                      | 21 | 0             | 23 | 0             | 25 | 0   | 69  | N/A              | 3.748E-05 | 132      | ✓             |                                               | ✓    | ✓         | (9)(19)(23)                                 |                                          |        |
| 13      | Q3TLH4-5  | PRC2C  | Isoform 5 of Protein PRRC2C GN=Prrc2c - [PRC2C_MOUSE]                                        | 0                      | 19 | 0             | 19 | 0             | 30 | 0   | 68  | N/A              | 3.479E-03 | 302      | ✓             |                                               | ✓    | ✓         | (19)(23)(26)                                |                                          |        |
| 14      | G3X928    | G3X928 | SEC23-interacting protein GN=Sec23ip PE=4 SV=1 - [G3X928_MOUSE]                              | 0                      | 20 | 0             | 24 | 0             | 23 | 0   | 67  | N/A              | 4.936E-05 | 111      | ✓             |                                               | ✓    | ✓         | (2)                                         |                                          |        |
| 15      | O88532    | ZFR    | Zinc finger RNA-binding protein GN=Zfr PE=1 SV=2 - [ZFR_MOUSE]                               | 0                      | 22 | 0             | 21 | 0             | 23 | 0   | 66  | N/A              | 2.833E-06 | 117      | ✓             |                                               | ✓    | ✓         | (1)(5)(12)(13)(19)(20)(26)                  |                                          |        |
| 16      | O70318    | E41L2  | Band 4.1-like protein 2 GN=Epb41l2 PE=1 SV=2 - [E41L2_MOUSE]                                 | 0                      | 17 | 0             | 22 | 0             | 22 | 0   | 61  | N/A              | 2.591E-04 | 110      | ✓             |                                               | ✓    | ✓         | (20)(23)                                    |                                          |        |
| 17      | Q8R317-2  | UBQL1  | Isoform 2 of Ubiquilin-1 GN=Ubqln1 - [UBQL1_MOUSE]                                           | 0                      | 19 | 0             | 22 | 0             | 19 | 0   | 60  | N/A              | 3.688E-05 | 58.6     | ✓             |                                               | ✓    | ✓         |                                             |                                          |        |
| 18      | Q9JKR6    | HYOU1  | Hypoxia up-regulated protein 1 GN=Hyou1 PE=1 SV=1 - [HYOU1_MOUSE]                            | 0                      | 23 | 0             | 22 | 0             | 14 | 0   | 59  | N/A              | 2.307E-03 | 111      |               | ✓                                             |      | ✓         | (26)                                        | (16)(17)                                 |        |
| 19      | Q8R317    | UBQL1  | Ubiquilin-1 GN=Ubqln1 PE=1 SV=1 - [UBQL1_MOUSE]                                              | 0                      | 18 | 0             | 22 | 0             | 18 | 0   | 58  | N/A              | 1.315E-04 | 61.9     | ✓             |                                               | ✓    | ✓         |                                             |                                          |        |
| 20      | P98078    | DAB2   | Disabled homolog 2 GN=Dab2 PE=1 SV=2 - [DAB2_MOUSE]                                          | 0                      | 21 | 0             | 15 | 0             | 22 | 0   | 58  | N/A              | 9.021E-04 | 82.3     | ✓             |                                               | ✓    | ✓         |                                             |                                          |        |
| 21      | Q7M6Y3-6  | PICA   | Isoform 6 of Phosphatidylinositol-binding clathrin assembly protein GN=Picalm - [PICA_MOUSE] | 0                      | 15 | 0             | 26 | 0             | 14 | 0   | 55  | N/A              | 8.846E-03 | 70.5     | ✓             |                                               | ✓    | ✓         |                                             | (17)                                     |        |
| 22      | Q80U93    | NU214  | Nuclear pore complex protein Nup214 GN=Nup214 PE=1 SV=2 - [NU214_MOUSE]                      | 0                      | 18 | 0             | 13 | 0             | 22 | 0   | 53  | N/A              | 2.462E-03 | 213      | ✓             |                                               | ✓    | ✓         | (1)(2)(19)(20)(23)(26)                      |                                          |        |
| 23      | Q9QZM0    | UBQL2  | Ubiquilin-2 GN=Ubqln2 PE=1 SV=2 - [UBQL2_MOUSE]                                              | 0                      | 15 | 0             | 17 | 0             | 19 | 0   | 51  | N/A              | 1.239E-04 | 67.3     | ✓             |                                               | ✓    | ✓         |                                             |                                          |        |
| 24      | Q91ZX7    | LRP1   | Prolow-density lipoprotein receptor-related protein 1 GN=Lrp1 PE=1 SV=1 - [LRP1_MOUSE]       | 0                      | 13 | 0             | 22 | 0             | 14 | 0   | 49  | N/A              | 4.579E-03 | 504      |               |                                               | ✓    | ✓         |                                             | (15)(16)(17)                             |        |
| 25      | Q80ZX0    | Q80ZX0 | Protein Sec24b GN=Sec24b PE=2 SV=1 - [Q80ZX0_MOUSE]                                          | 0                      | 15 | 0             | 19 | 0             | 15 | 0   | 49  | N/A              | 2.550E-04 | 136      | ✓             |                                               | ✓    | ✓         | (2)                                         |                                          |        |
| 26      | Q3TN34    | Q3TN34 | JRAB GN=Mical2 PE=2 SV=1 - [Q3TN34_MOUSE]                                                    | 0                      | 15 | 0             | 18 | 0             | 15 | 0   | 48  | N/A              | 8.922E-05 | 108      | ✓             |                                               | ✓    | ✓         | (26)                                        |                                          |        |
| 27      | E9Q4Q2    | E9Q4Q2 | Splicing factor 1 GN=Sf1 PE=4 SV=1 - [E9Q4Q2_MOUSE]                                          | 0                      | 12 | 0             | 19 | 0             | 17 | 0   | 48  | N/A              | 1.541E-03 | 59.7     | ✓             |                                               | ✓    | ✓         |                                             |                                          |        |
| 28      | F6TQN9    | F6TQN9 | Disabled homolog 2 (Fragment) GN=Dab2 PE=4 SV=1 - [F6TQN9_MOUSE]                             | 0                      | 18 | 0             | 10 | 0             | 18 | 0   | 46  | N/A              | 4.535E-03 | 67.8     | ✓             |                                               | ✓    | ✓         |                                             |                                          |        |
| 29      | A2AMY5    | A2AMY5 | Ubiquitin-associated protein 2 GN=Ubp2 PE=4 SV=1 - [A2AMY5_MOUSE]                            | 0                      | 17 | 0             | 13 | 0             | 14 | 0   | 44  | N/A              | 2.588E-04 | 118      | ✓             |                                               | ✓    | ✓         |                                             |                                          |        |
| 30      | Q8BFR4    | GNS    | N-acetylglucosamine-6-sulfatase GN=Gns PE=2 SV=1 - [GNS_MOUSE]                               | 0                      | 15 | 0             | 14 | 0             | 14 | 0   | 43  | N/A              | 1.749E-06 | 61.1     |               | ✓                                             |      | ✓         | (9)(23)                                     | (17)                                     |        |
| 31      | P70699    | LYAG   | Lysosomal alpha-glucosidase GN=Gaa PE=1 SV=2 - [LYAG_MOUSE]                                  | 0                      | 11 | 0             | 16 | 0             | 16 | 0   | 43  | N/A              | 1.005E-03 | 106      |               | ✓                                             |      | ✓         |                                             | (16)(17)                                 |        |

| N<br>o. | Accession | Gene   | Description                                                                                   | GalNAz                 |    |                        |    |                        |    |     |    |     |           | En-<br>rich-<br>ment<br>Ratio | t-test | MW<br>[kDa] | Localization                 |                                                        |      |                        | Previous O-<br>GlcNAc<br>Proteomics<br>Identification | Previous<br>Mucin Pro-<br>teomics<br>Identification |
|---------|-----------|--------|-----------------------------------------------------------------------------------------------|------------------------|----|------------------------|----|------------------------|----|-----|----|-----|-----------|-------------------------------|--------|-------------|------------------------------|--------------------------------------------------------|------|------------------------|-------------------------------------------------------|-----------------------------------------------------|
|         |           |        |                                                                                               | Spectral Counts        |    |                        |    |                        |    |     |    |     |           |                               |        |             | Exclusively<br>Intracellular | Exclusively<br>Extracellular,<br>Lysosomal,<br>Luminal | Both | 6AzGlcNAc              |                                                       |                                                     |
|         |           |        |                                                                                               | Ex-<br>peri-<br>ment 1 |    | Ex-<br>peri-<br>ment 2 |    | Ex-<br>peri-<br>ment 3 |    | Sum |    |     |           |                               |        |             |                              |                                                        |      |                        |                                                       |                                                     |
|         |           |        |                                                                                               | -                      | +  | -                      | +  | -                      | +  | -   | +  |     |           |                               |        |             |                              |                                                        |      |                        |                                                       |                                                     |
| 32      | P10852    | 4F2    | 4F2 cell-surface antigen heavy chain GN=Slc3a2 PE=1 SV=1 - [4F2_MOUSE]                        | 0                      | 12 | 0                      | 16 | 0                      | 15 | 0   | 43 | N/A | 2.832E-04 | 58.3                          |        |             |                              | ✓                                                      | ✓    |                        | (10)(17)                                              |                                                     |
| 33      | Q8VIJ6    | SFPQ   | Splicing factor, proline- and glutamine-rich GN=Sfpq PE=1 SV=1 - [SFPQ_MOUSE]                 | 0                      | 10 | 0                      | 18 | 0                      | 14 | 0   | 42 | N/A | 3.738E-03 | 75.4                          | ✓      |             |                              |                                                        | ✓    | (5)(9)(19)(20)(23)(24) | (17)                                                  |                                                     |
| 34      | Q63850    | NUP62  | Nuclear pore glycoprotein p62 GN=Nup62 PE=1 SV=2 - [NUP62_MOUSE]                              | 0                      | 12 | 0                      | 15 | 0                      | 15 | 0   | 42 | N/A | 1.510E-04 | 53.2                          | ✓      |             |                              |                                                        | ✓    | (2)(9)(19)(23)(26)     | (17)                                                  |                                                     |
| 35      | G3UWA6    | G3UWA6 | 4F2 cell-surface antigen heavy chain GN=Slc3a2 PE=4 SV=1 - [G3UWA6_MOUSE]                     | 0                      | 11 | 0                      | 16 | 0                      | 14 | 0   | 41 | N/A | 7.120E-04 | 62.2                          |        |             |                              | ✓                                                      |      |                        | (10)                                                  |                                                     |
| 36      | H3BKM0    | H3BKM0 | AP-2 complex subunit beta GN=Ap2b1 PE=4 SV=1 - [H3BKM0_MOUSE]                                 | 0                      | 12 | 0                      | 14 | 0                      | 15 | 0   | 41 | N/A | 1.012E-04 | 101                           | ✓      |             |                              |                                                        |      |                        |                                                       |                                                     |
| 37      | Q5SUT0    | Q5SUT0 | Ewing sarcoma breakpoint region 1 GN=Ewsr1 PE=2 SV=1 - [Q5SUT0_MOUSE]                         | 0                      | 12 | 0                      | 15 | 0                      | 13 | 0   | 40 | N/A | 1.116E-04 | 64.9                          | ✓      |             |                              |                                                        | ✓    | (26)                   |                                                       |                                                     |
| 38      | Q60865    | CAPR1  | Caprin-1 GN=Caprin1 PE=1 SV=2 - [CAPR1_MOUSE]                                                 | 0                      | 14 | 0                      | 13 | 0                      | 13 | 0   | 40 | N/A | 2.334E-06 | 78.1                          | ✓      |             |                              | ✓                                                      | ✓    | (19)(23)(26)           |                                                       |                                                     |
| 39      | B1ATZ0    | B1ATZ0 | HGF-regulated tyrosine kinase substrate GN=Hgs PE=4 SV=1 - [B1ATZ0_MOUSE]                     | 0                      | 13 | 0                      | 13 | 0                      | 14 | 0   | 40 | N/A | 2.334E-06 | 85.7                          | ✓      |             |                              |                                                        | ✓    |                        |                                                       |                                                     |
| 40      | E9Q3G8    | E9Q3G8 | Protein Nup153 GN=Nup153 PE=4 SV=1 - [E9Q3G8_MOUSE]                                           | 0                      | 13 | 0                      | 12 | 0                      | 14 | 0   | 39 | N/A | 2.304E-05 | 152                           | ✓      |             |                              |                                                        | ✓    | (2)(12)(20)            |                                                       |                                                     |
| 41      | Q9DBG5    | PLIN3  | Perilipin-3 GN=Plin3 PE=1 SV=1 - [PLIN3_MOUSE]                                                | 0                      | 8  | 0                      | 14 | 0                      | 17 | 0   | 39 | N/A | 7.966E-03 | 47.2                          | ✓      |             |                              | ✓                                                      | ✓    | (1)(9)(20)(23)         |                                                       |                                                     |
| 42      | G3X972    | G3X972 | Protein Sec24c GN=Sec24c PE=4 SV=1 - [G3X972_MOUSE]                                           | 0                      | 12 | 0                      | 14 | 0                      | 12 | 0   | 38 | N/A | 4.520E-05 | 119                           | ✓      |             |                              | ✓                                                      | ✓    | (2)                    |                                                       |                                                     |
| 43      | Q8CFQ9    | Q8CFQ9 | Fusion, derived from t(12;16) malignant liposarcoma (Human) GN=Fus PE=2 SV=1 - [Q8CFQ9_MOUSE] | 0                      | 12 | 0                      | 12 | 0                      | 14 | 0   | 38 | N/A | 4.520E-05 | 52.6                          | ✓      |             |                              |                                                        | ✓    |                        |                                                       |                                                     |
| 44      | Q8C2Q3    | RBM14  | RNA-binding protein 14 GN=Rbm14 PE=1 SV=1 - [RBM14_MOUSE]                                     | 0                      | 8  | 0                      | 17 | 0                      | 12 | 0   | 37 | N/A | 9.055E-03 | 69.4                          | ✓      |             |                              |                                                        | ✓    | (1)(9)(20)(23)(24)     |                                                       |                                                     |
| 45      | Q8VDM6    | HNRL1  | Heterogeneous nuclear ribonucleoprotein U-like protein 1 GN=Hnrlp1 PE=1 SV=1 - [HNRL1_MOUSE]  | 0                      | 7  | 0                      | 15 | 0                      | 15 | 0   | 37 | N/A | 9.844E-03 | 95.9                          | ✓      |             |                              |                                                        | ✓    |                        |                                                       |                                                     |
| 46      | Q9WVG6-2  | CARM1  | Isoform 2 of Histone-arginine methyltransferase CARM1 GN=Carm1 - [CARM1_MOUSE]                | 0                      | 12 | 0                      | 12 | 0                      | 12 | 0   | 36 | N/A | 0.000E+00 | 63.4                          | ✓      |             |                              |                                                        | ✓    | (5)(9)(19)(23)         |                                                       |                                                     |
| 47      | Q8BL80    | RHG22  | Rho GTPase-activating protein 22 GN=Arhgap22 PE=1 SV=2 - [RHG22_MOUSE]                        | 0                      | 12 | 0                      | 10 | 0                      | 14 | 0   | 36 | N/A | 4.841E-04 | 77.7                          | ✓      |             |                              |                                                        |      |                        |                                                       |                                                     |
| 48      | O70305-2  | ATX2   | Isoform 2 of Ataxin-2 GN=Atxn2 - [ATX2_MOUSE]                                                 | 0                      | 10 | 0                      | 15 | 0                      | 11 | 0   | 36 | N/A | 1.419E-03 | 129                           | ✓      |             |                              | ✓                                                      | ✓    |                        |                                                       |                                                     |
| 49      | P54728    | RD23B  | UV excision repair protein RAD23 homolog B GN=Rad23b PE=1 SV=2 - [RD23B_MOUSE]                | 0                      | 12 | 0                      | 13 | 0                      | 10 | 0   | 35 | N/A | 1.887E-04 | 43.5                          | ✓      |             |                              |                                                        | ✓    | (5)(23)                | (17)                                                  |                                                     |
| 50      | Q9D824-4  | FIP1   | Isoform 4 of Pre-mRNA 3'-end-processing factor FIP1 GN=Fip11 - [FIP1_MOUSE]                   | 0                      | 10 | 0                      | 13 | 0                      | 11 | 0   | 34 | N/A | 2.114E-04 | 55.8                          | ✓      |             |                              |                                                        |      | (23)                   |                                                       |                                                     |
| 51      | P59326    | YTHD1  | YTH domain family protein 1 GN=Ythdf1 PE=2 SV=1 - [YTHD1_MOUSE]                               | 0                      | 12 | 0                      | 10 | 0                      | 11 | 0   | 33 | N/A | 4.471E-05 | 60.8                          | ✓      |             |                              |                                                        | ✓    | (19)                   |                                                       |                                                     |
| 52      | Q8BYK6    | YTHD3  | YTH domain family protein 3 GN=Ythdf3 PE=1 SV=2 - [YTHD3_MOUSE]                               | 0                      | 9  | 0                      | 14 | 0                      | 10 | 0   | 33 | N/A | 1.971E-03 | 63.9                          | ✓      |             |                              |                                                        | ✓    | (1)(19)(20)            |                                                       |                                                     |
| 53      | Q6PFD9    | Q6PFD9 | Nucleoporin 98 GN=Nup98 PE=1 SV=1 - [Q6PFD9_MOUSE]                                            | 0                      | 9  | 0                      | 10 | 0                      | 13 | 0   | 32 | N/A | 8.903E-04 | 125                           | ✓      |             |                              |                                                        | ✓    | (20)                   |                                                       |                                                     |
| 54      | Q9WV92-3  | E41L3  | Isoform 3 of Band 4.1-like protein 3 GN=Epb4113 - [E41L3_MOUSE]                               | 0                      | 8  | 0                      | 10 | 0                      | 14 | 0   | 32 | N/A | 3.772E-03 | 102                           | ✓      |             |                              |                                                        | ✓    |                        |                                                       |                                                     |
| 55      | Q6NXL1    | Q6NXL1 | Protein Sec24d GN=Sec24d PE=2 SV=1 - [Q6NXL1_MOUSE]                                           | 0                      | 8  | 0                      | 12 | 0                      | 11 | 0   | 31 | N/A | 1.006E-03 | 113                           | ✓      |             |                              |                                                        | ✓    | (2)                    |                                                       |                                                     |
| 56      | Q99P91    | GPNMB  | Transmembrane glycoprotein NMB GN=Gpnmb PE=1 SV=2 - [GPNMB_MOUSE]                             | 0                      | 8  | 0                      | 11 | 0                      | 12 | 0   | 31 | N/A | 1.006E-03 | 63.6                          |        |             |                              | ✓                                                      | ✓    |                        |                                                       |                                                     |
| 57      | Q8BH97    | RCN3   | Reticulocalbin-3 GN=Rcn3 PE=2 SV=1 - [RCN3_MOUSE]                                             | 0                      | 12 | 0                      | 8  | 0                      | 10 | 0   | 30 | N/A | 9.781E-04 | 38.0                          |        |             |                              | ✓                                                      | ✓    |                        | (17)                                                  |                                                     |
| 58      | P27546-2  | MAP4   | Isoform 2 of Microtubule-associated protein 4 GN=Map4 - [MAP4_MOUSE]                          | 0                      | 10 | 0                      | 10 | 0                      | 10 | 0   | 30 | N/A | 0.000E+00 | 117                           | ✓      |             |                              | ✓                                                      | ✓    | (9)(19)(23)(26)        |                                                       |                                                     |
| 59      | Q9R0E1    | PLOD3  | Procollagen-lysine,2-oxoglutarate 5-dioxygenase 3 GN=Plod3 PE=1 SV=1 - [PLOD3_MOUSE]          | 0                      | 12 | 0                      | 12 | 0                      | 6  | 0   | 30 | N/A | 7.490E-03 | 84.9                          |        |             |                              | ✓                                                      |      |                        |                                                       |                                                     |
| 60      | Q9Z1A1    | Q9Z1A1 | Protein Tfg GN=Tfg PE=2 SV=1 - [Q9Z1A1_MOUSE]                                                 | 0                      | 11 | 0                      | 8  | 0                      | 11 | 0   | 30 | N/A | 5.620E-04 | 43.0                          | ✓      |             |                              |                                                        | ✓    |                        |                                                       |                                                     |
| 61      | Q9WU78    | PDC61  | Programmed cell death 6-interacting protein GN=Pdc61p PE=1 SV=3 - [PDC61_MOUSE]               | 0                      | 6  | 0                      | 11 | 0                      | 13 | 0   | 30 | N/A | 8.624E-03 | 96.0                          | ✓      |             |                              | ✓                                                      | ✓    |                        |                                                       |                                                     |
| 62      | Q04857    | CO6A1  | Collagen alpha-1(VI) chain GN=Col6a1 PE=2 SV=1 - [CO6A1_MOUSE]                                | 0                      | 7  | 0                      | 11 | 0                      | 11 | 0   | 29 | N/A | 1.921E-03 | 108                           |        |             |                              | ✓                                                      |      |                        | (17)                                                  |                                                     |
| 63      | P40124    | CAP1   | Adenylyl cyclase-associated protein 1 GN=Cap1 PE=1 SV=4 - [CAP1_MOUSE]                        | 0                      | 11 | 0                      | 9  | 0                      | 9  | 0   | 29 | N/A | 1.315E-04 | 51.5                          | ✓      |             |                              | ✓                                                      | ✓    | (9)(23)(26)            |                                                       |                                                     |
| 64      | Q3UEB3-3  | PUF60  | Isoform 3 of Poly(U)-binding-splicing factor PUF60 GN=Puf60 - [PUF60_MOUSE]                   | 0                      | 7  | 0                      | 12 | 0                      | 10 | 0   | 29 | N/A | 2.651E-03 | 54.0                          | ✓      |             |                              |                                                        |      | (9)(23)                |                                                       |                                                     |
| 65      | Q8VCF0    | MAVS   | Mitochondrial antiviral-signaling protein GN=Mavs PE=1 SV=1 - [MAVS_MOUSE]                    | 0                      | 9  | 0                      | 11 | 0                      | 9  | 0   | 29 | N/A | 1.315E-04 | 53.4                          | ✓      |             |                              | ✓                                                      | ✓    | (5)(9)(20)(23)         |                                                       |                                                     |
| 66      | Q8K2K6-3  | AGFG1  | Isoform 3 of Arf-GAP domain and FG repeat-containing protein 1 GN=Agfg1 - [AGFG1_MOL_MOUSE]   | 0                      | 8  | 0                      | 11 | 0                      | 9  | 0   | 28 | N/A | 4.511E-04 | 55.0                          | ✓      |             |                              |                                                        |      | (9)(19)(23)            |                                                       |                                                     |
| 67      | Q91Y77    | Q91Y77 | Protein Ythdf2 GN=Ythdf2 PE=2 SV=1 - [Q91Y77_MOUSE]                                           | 0                      | 9  | 0                      | 9  | 0                      | 10 | 0   | 28 | N/A | 9.679E-06 | 62.2                          | ✓      |             |                              |                                                        | ✓    |                        |                                                       |                                                     |
| 68      | Q62165    | DAG1   | Dystroglycan GN=Dag1 PE=1 SV=4 - [DAG1_MOUSE]                                                 | 0                      | 7  | 0                      | 9  | 0                      | 11 | 0   | 27 | N/A | 1.462E-03 | 96.8                          |        |             |                              | ✓                                                      |      | (23)                   | (15)(16)(17)                                          |                                                     |
| 69      | Q62351    | TFR1   | Transferrin receptor protein 1 GN=Tfrc PE=1 SV=1 - [TFR1_MOUSE]                               | 0                      | 12 | 0                      | 11 | 0                      | 4  | 0   | 27 | N/A | 2.325E-02 | 85.7                          |        |             |                              | ✓                                                      |      |                        | (10)(16)                                              |                                                     |
| 70      | Q8R4X3    | RBM12  | RNA-binding protein 12 GN=Rbm12 PE=1 SV=3 - [RBM12_MOUSE]                                     | 0                      | 7  | 0                      | 10 | 0                      | 10 | 0   | 27 | N/A | 8.438E-04 | 103                           | ✓      |             |                              |                                                        |      | (9)(23)                |                                                       |                                                     |
| 71      | Q8K4Q8    | COL12  | Collectin-12 GN=Colec12 PE=1 SV=1 - [COL12_MOUSE]                                             | 0                      | 9  | 0                      | 9  | 0                      | 9  | 0   | 27 | N/A | 0.000E+00 | 81.3                          |        |             |                              | ✓                                                      |      |                        |                                                       |                                                     |
| 72      | Q3UF95    | Q3UF95 | Large proline-rich protein BAG6 GN=Bag6 PE=2 SV=1 - [Q3UF95_MOUSE]                            | 0                      | 9  | 0                      | 9  | 0                      | 9  | 0   | 27 | N/A | 0.000E+00 | 119                           | ✓      |             |                              |                                                        |      |                        |                                                       |                                                     |

|     |           |        |                                                                                                |   |    |   |    |   |    |   |    |     |           | GalNAz          |          |          |             |             |       |        |                    |          |  |  |  |  |  |  |  |  |  |
|-----|-----------|--------|------------------------------------------------------------------------------------------------|---|----|---|----|---|----|---|----|-----|-----------|-----------------|----------|----------|-------------|-------------|-------|--------|--------------------|----------|--|--|--|--|--|--|--|--|--|
|     |           |        |                                                                                                |   |    |   |    |   |    |   |    |     |           | Spectral Counts |          |          |             |             |       |        |                    |          |  |  |  |  |  |  |  |  |  |
|     |           |        |                                                                                                |   |    |   |    |   |    |   |    |     |           | Ex-             | Ex-      | Ex-      |             |             |       |        |                    |          |  |  |  |  |  |  |  |  |  |
|     |           |        |                                                                                                |   |    |   |    |   |    |   |    |     |           | periment        | periment | periment |             |             |       |        |                    |          |  |  |  |  |  |  |  |  |  |
|     |           |        |                                                                                                |   |    |   |    |   |    |   |    |     |           | 1               | 2        | 3        |             |             |       |        |                    |          |  |  |  |  |  |  |  |  |  |
|     |           |        |                                                                                                |   |    |   |    |   |    |   |    |     |           | Sum             |          |          |             |             |       |        |                    |          |  |  |  |  |  |  |  |  |  |
|     |           |        |                                                                                                |   |    |   |    |   |    |   |    |     |           | En-             |          |          |             |             |       |        |                    |          |  |  |  |  |  |  |  |  |  |
|     |           |        |                                                                                                |   |    |   |    |   |    |   |    |     |           | rich-           |          |          |             |             |       |        |                    |          |  |  |  |  |  |  |  |  |  |
|     |           |        |                                                                                                |   |    |   |    |   |    |   |    |     |           | ment            |          |          |             |             |       |        |                    |          |  |  |  |  |  |  |  |  |  |
|     |           |        |                                                                                                |   |    |   |    |   |    |   |    |     |           | Ratio           |          |          |             |             |       |        |                    |          |  |  |  |  |  |  |  |  |  |
|     |           |        |                                                                                                |   |    |   |    |   |    |   |    |     |           | t-test          |          |          |             |             |       |        |                    |          |  |  |  |  |  |  |  |  |  |
|     |           |        |                                                                                                |   |    |   |    |   |    |   |    |     |           | MW              |          |          |             |             |       |        |                    |          |  |  |  |  |  |  |  |  |  |
|     |           |        |                                                                                                |   |    |   |    |   |    |   |    |     |           | [kDa]           |          |          |             |             |       |        |                    |          |  |  |  |  |  |  |  |  |  |
|     |           |        |                                                                                                |   |    |   |    |   |    |   |    |     |           | Exclusively     |          |          |             |             |       |        |                    |          |  |  |  |  |  |  |  |  |  |
|     |           |        |                                                                                                |   |    |   |    |   |    |   |    |     |           | Intracellular   |          |          |             |             |       |        |                    |          |  |  |  |  |  |  |  |  |  |
|     |           |        |                                                                                                |   |    |   |    |   |    |   |    |     |           | Exclusively     |          |          |             |             |       |        |                    |          |  |  |  |  |  |  |  |  |  |
|     |           |        |                                                                                                |   |    |   |    |   |    |   |    |     |           | Extracellular,  |          |          |             |             |       |        |                    |          |  |  |  |  |  |  |  |  |  |
|     |           |        |                                                                                                |   |    |   |    |   |    |   |    |     |           | Lysosomal,      |          |          |             |             |       |        |                    |          |  |  |  |  |  |  |  |  |  |
|     |           |        |                                                                                                |   |    |   |    |   |    |   |    |     |           | Luminal         |          |          |             |             |       |        |                    |          |  |  |  |  |  |  |  |  |  |
|     |           |        |                                                                                                |   |    |   |    |   |    |   |    |     |           | Both            |          |          |             |             |       |        |                    |          |  |  |  |  |  |  |  |  |  |
|     |           |        |                                                                                                |   |    |   |    |   |    |   |    |     |           | 6AzGI           |          |          |             |             |       |        |                    |          |  |  |  |  |  |  |  |  |  |
|     |           |        |                                                                                                |   |    |   |    |   |    |   |    |     |           | cNAc            |          |          |             |             |       |        |                    |          |  |  |  |  |  |  |  |  |  |
|     |           |        |                                                                                                |   |    |   |    |   |    |   |    |     |           | GlcNAz          |          |          |             |             |       |        |                    |          |  |  |  |  |  |  |  |  |  |
|     |           |        |                                                                                                |   |    |   |    |   |    |   |    |     |           | Previous O-     |          |          |             |             |       |        |                    |          |  |  |  |  |  |  |  |  |  |
|     |           |        |                                                                                                |   |    |   |    |   |    |   |    |     |           | GlcNAc          |          |          |             |             |       |        |                    |          |  |  |  |  |  |  |  |  |  |
|     |           |        |                                                                                                |   |    |   |    |   |    |   |    |     |           | Proteomics      |          |          |             |             |       |        |                    |          |  |  |  |  |  |  |  |  |  |
|     |           |        |                                                                                                |   |    |   |    |   |    |   |    |     |           | Identification  |          |          |             |             |       |        |                    |          |  |  |  |  |  |  |  |  |  |
|     |           |        |                                                                                                |   |    |   |    |   |    |   |    |     |           | Previous        |          |          |             |             |       |        |                    |          |  |  |  |  |  |  |  |  |  |
|     |           |        |                                                                                                |   |    |   |    |   |    |   |    |     |           | Mucin           |          |          |             |             |       |        |                    |          |  |  |  |  |  |  |  |  |  |
|     |           |        |                                                                                                |   |    |   |    |   |    |   |    |     |           | Pro-            |          |          |             |             |       |        |                    |          |  |  |  |  |  |  |  |  |  |
|     |           |        |                                                                                                |   |    |   |    |   |    |   |    |     |           | teomics         |          |          |             |             |       |        |                    |          |  |  |  |  |  |  |  |  |  |
|     |           |        |                                                                                                |   |    |   |    |   |    |   |    |     |           | Identification  |          |          |             |             |       |        |                    |          |  |  |  |  |  |  |  |  |  |
| No. | Accession | Gene   | Description                                                                                    | - | +  | - | +  | - | +  | - | +  | -   | +         | En-             | t-test   | MW       | Exclusively | Exclusively | 6AzGI | GlcNAz | Previous O-        | Previous |  |  |  |  |  |  |  |  |  |
| 73  | Q02788    | CO6A2  | Collagen alpha-2(VI) chain GN=Col6a2 PE=2 SV=3 - [CO6A2_MOUSE]                                 | 0 | 9  | 0 | 8  | 0 | 9  | 0 | 26 | N/A | 1.300E-05 | 110             |          |          | ✓           |             |       |        | (26)               |          |  |  |  |  |  |  |  |  |  |
| 74  | Q5F2E7    | NUPF2  | Nuclear fragile X mental retardation-interacting protein 2 GN=Nufip2 PE=1 SV=1 - [NUPF2_MOUSE] | 0 | 10 | 0 | 9  | 0 | 7  | 0 | 26 | N/A | 6.012E-04 | 75.6            | ✓        |          |             |             |       |        | (1)(20)            |          |  |  |  |  |  |  |  |  |  |
| 75  | P01897    | HA1L   | H-2 class I histocompatibility antigen, L-D alpha chain GN=H2-L PE=1 SV=2 - [HA1L_MOUSE]       | 0 | 10 | 0 | 8  | 0 | 8  | 0 | 26 | N/A | 2.020E-04 | 40.7            |          |          | ✓           |             | ✓     |        |                    |          |  |  |  |  |  |  |  |  |  |
| 76  | Q640N1    | AEBP1  | Adipocyte enhancer-binding protein 1 GN=Aebp1 PE=1 SV=1 - [AEBP1_MOUSE]                        | 0 | 8  | 0 | 8  | 0 | 9  | 0 | 25 | N/A | 1.520E-05 | 128             |          |          | ✓           |             |       |        |                    | (17)     |  |  |  |  |  |  |  |  |  |
| 77  | P83741-4  | WNK1   | Isoform 4 of Serine/threonine-protein kinase WNK1 GN=Wnk1 - [WNK1_MOUSE]                       | 0 | 8  | 0 | 7  | 0 | 10 | 0 | 25 | N/A | 6.996E-04 | 225             | ✓        |          |             |             |       | ✓      | (5)(9)(13)(19)(23) |          |  |  |  |  |  |  |  |  |  |
| 78  | A2ATI9    | A2ATI9 | Golgi reassembly stacking protein 2 GN=Gorasp2 PE=4 SV=1 - [A2ATI9_MOUSE]                      | 0 | 8  | 0 | 8  | 0 | 9  | 0 | 25 | N/A | 1.520E-05 | 45.0            |          |          |             | ✓           |       | ✓      | (12)               |          |  |  |  |  |  |  |  |  |  |
| 79  | F8VQJ3    | F8VQJ3 | Laminin subunit gamma-1 GN=Lamc1 PE=4 SV=1 - [F8VQJ3_MOUSE]                                    | 0 | 7  | 0 | 13 | 0 | 5  | 0 | 25 | N/A | 2.566E-02 | 177             |          |          | ✓           |             |       |        |                    |          |  |  |  |  |  |  |  |  |  |
| 80  | P01899    | HA11   | H-2 class I histocompatibility antigen, D-B alpha chain GN=H2-D1 PE=1 SV=2 - [HA11_MOUSE]      | 0 | 10 | 0 | 8  | 0 | 7  | 0 | 25 | N/A | 6.996E-04 | 40.8            |          |          |             | ✓           |       | ✓      |                    |          |  |  |  |  |  |  |  |  |  |
| 81  | Q9QX47-2  | SON    | Isoform 2 of Protein SON GN=Son - [SON_MOUSE]                                                  | 0 | 6  | 0 | 8  | 0 | 10 | 0 | 24 | N/A | 2.278E-03 | 230             | ✓        |          |             |             |       |        | (9)(23)            |          |  |  |  |  |  |  |  |  |  |
| 82  | P04095    | PR2C2  | Prolactin-2C2 GN=Pr12c2 PE=1 SV=1 - [PR2C2_MOUSE]                                              | 0 | 8  | 0 | 7  | 0 | 9  | 0 | 24 | N/A | 1.573E-04 | 25.4            |          |          |             | ✓           |       | ✓      |                    |          |  |  |  |  |  |  |  |  |  |
| 83  | Q5SUH7    | Q5SUH7 | Clathrin interactor 1 GN=Clint1 PE=2 SV=1 - [Q5SUH7_MOUSE]                                     | 0 | 9  | 0 | 10 | 0 | 5  | 0 | 24 | N/A | 6.352E-03 | 67.7            | ✓        |          |             |             |       | ✓      |                    |          |  |  |  |  |  |  |  |  |  |
| 84  | P47930    | FOSL2  | Fos-related antigen 2 GN=Fosl2 PE=2 SV=2 - [FOSL2_MOUSE]                                       | 0 | 10 | 0 | 5  | 0 | 9  | 0 | 24 | N/A | 6.352E-03 | 35.3            | ✓        |          |             |             |       | ✓      |                    |          |  |  |  |  |  |  |  |  |  |
| 85  | D3YUW8    | D3YUW8 | Pogo transposable element with ZNF domain GN=Pogz PE=4 SV=1 - [D3YUW8_MOUSE]                   | 0 | 6  | 0 | 10 | 0 | 8  | 0 | 24 | N/A | 2.278E-03 | 145             | ✓        |          |             |             |       | ✓      |                    |          |  |  |  |  |  |  |  |  |  |
| 86  | Q9R1Q9    | VAS1   | V-type proton ATPase subunit S1 GN=Atp6ap1 PE=1 SV=1 - [VAS1_MOUSE]                            | 0 | 7  | 0 | 9  | 0 | 7  | 0 | 23 | N/A | 3.264E-04 | 51.0            |          |          |             | ✓           |       |        |                    | (17)     |  |  |  |  |  |  |  |  |  |
| 87  | O08795    | GLU2B  | Glucosidase 2 subunit beta GN=Prkcsb PE=1 SV=1 - [GLU2B_MOUSE]                                 | 0 | 6  | 0 | 8  | 0 | 9  | 0 | 23 | N/A | 9.640E-04 | 58.8            |          |          |             | ✓           |       |        | (20)               | (16)     |  |  |  |  |  |  |  |  |  |
| 88  | Q8BTS4    | NUP54  | Nuclear pore complex protein Nup54 GN=Nup54 PE=1 SV=1 - [NUP54_MOUSE]                          | 0 | 6  | 0 | 11 | 0 | 6  | 0 | 23 | N/A | 1.003E-02 | 55.7            | ✓        |          |             |             |       |        | (2)(9)(23)(24)     |          |  |  |  |  |  |  |  |  |  |
| 89  | Q91YD3    | DCP1A  | mRNA-decapping enzyme 1A GN=Dcp1a PE=1 SV=1 - [DCP1A_MOUSE]                                    | 0 | 8  | 0 | 7  | 0 | 8  | 0 | 23 | N/A | 2.117E-05 | 65.2            | ✓        |          |             |             |       |        | (1)(9)(23)         |          |  |  |  |  |  |  |  |  |  |
| 90  | P29533    | VCAM1  | Vascular cell adhesion protein 1 GN=Vcam1 PE=1 SV=1 - [VCAM1_MOUSE]                            | 0 | 5  | 0 | 11 | 0 | 7  | 0 | 23 | N/A | 1.219E-02 | 81.3            |          |          |             | ✓           |       |        |                    |          |  |  |  |  |  |  |  |  |  |
| 91  | Q3UPH1    | PRRC1  | Protein PRRC1 GN=Prrc1 PE=2 SV=1 - [PRRC1_MOUSE]                                               | 0 | 6  | 0 | 7  | 0 | 9  | 0 | 22 | N/A | 1.143E-03 | 46.3            |          |          |             | ✓           |       | ✓      | (19)(26)           | (17)     |  |  |  |  |  |  |  |  |  |
| 92  | Q3U1M7    | Q3U1M7 | Protein Zmynd8 GN=Zmynd8 PE=2 SV=1 - [Q3U1M7_MOUSE]                                            | 0 | 4  | 0 | 8  | 0 | 10 | 0 | 22 | N/A | 1.417E-02 | 130             | ✓        |          |             |             |       |        |                    |          |  |  |  |  |  |  |  |  |  |
| 93  | P37889-2  | FBLN2  | Isoform 2 of Fibulin-2 GN=Fbln2 - [FBLN2_MOUSE]                                                | 0 | 7  | 0 | 6  | 0 | 8  | 0 | 21 | N/A | 2.655E-04 | 126             |          |          |             | ✓           |       |        |                    | (16)     |  |  |  |  |  |  |  |  |  |
| 94  | P11688    | ITA5   | Integrin alpha-5 GN=Itga5 PE=1 SV=3 - [ITA5_MOUSE]                                             | 0 | 7  | 0 | 7  | 0 | 7  | 0 | 21 | N/A | 0.000E+00 | 115             |          |          |             | ✓           |       |        |                    | (10)(16) |  |  |  |  |  |  |  |  |  |
| 95  | Q9CZR2    | NALD2  | N-acetylated-alpha-linked acidic dipeptidase 2 GN=Naalad2 PE=1 SV=2 - [NALD2_MOUSE]            | 0 | 7  | 0 | 6  | 0 | 8  | 0 | 21 | N/A | 2.655E-04 | 82.7            |          |          |             | ✓           |       |        |                    |          |  |  |  |  |  |  |  |  |  |
| 96  | Q8BHN3    | GANAB  | Neutral alpha-glucosidase AB GN=Ganab PE=1 SV=1 - [GANAB_MOUSE]                                | 0 | 7  | 0 | 7  | 0 | 7  | 0 | 21 | N/A | 0.000E+00 | 107             |          |          |             | ✓           |       |        |                    |          |  |  |  |  |  |  |  |  |  |
| 97  | Q6P4T3    | Q6P4T3 | Eyes absent 3 homolog (Drosophila) GN=Eya3 PE=2 SV=1 - [Q6P4T3_MOUSE]                          | 0 | 7  | 0 | 7  | 0 | 7  | 0 | 21 | N/A | 0.000E+00 | 57.8            | ✓        |          |             |             |       | ✓      |                    |          |  |  |  |  |  |  |  |  |  |
| 98  | Q8K3Z9    | PO121  | Nuclear envelope pore membrane protein POM 121 GN=Pom121 PE=1 SV=2 - [PO121_MOUSE]             | 0 | 9  | 0 | 3  | 0 | 8  | 0 | 20 | N/A | 2.292E-02 | 121             | ✓        |          |             |             |       | ✓      | (1)                |          |  |  |  |  |  |  |  |  |  |
| 99  | Q91VZ6    | SMAP1  | Stromal membrane-associated protein 1 GN=Smap1 PE=1 SV=1 - [SMAP1_MOUSE]                       | 0 | 6  | 0 | 8  | 0 | 6  | 0 | 20 | N/A | 5.620E-04 | 47.6            | ✓        |          |             |             |       |        |                    |          |  |  |  |  |  |  |  |  |  |
| 100 | E9QAR6    | E9QAR6 | Protein Zfp384 GN=Zfp384 PE=4 SV=1 - [E9QAR6_MOUSE]                                            | 0 | 7  | 0 | 5  | 0 | 8  | 0 | 20 | N/A | 1.641E-03 | 61.7            | ✓        |          |             |             |       |        |                    |          |  |  |  |  |  |  |  |  |  |
| 101 | E9Q7W0    | E9Q7W0 | Recombining-binding protein suppressor of hairless GN=Rbpj PE=4 SV=1 - [E9Q7W0_MOUSE]          | 0 | 5  | 0 | 7  | 0 | 8  | 0 | 20 | N/A | 1.641E-03 | 54.3            | ✓        |          |             |             |       | ✓      |                    |          |  |  |  |  |  |  |  |  |  |
| 102 | Q9DBH5    | LMAN2  | Vesicular integral-membrane protein VIP36 GN=Lman2 PE=2 SV=2 - [LMAN2_MOUSE]                   | 0 | 4  | 0 | 8  | 0 | 7  | 0 | 19 | N/A | 6.214E-03 | 40.4            |          |          |             | ✓           |       |        |                    | (17)     |  |  |  |  |  |  |  |  |  |
| 103 | Q61187    | TS101  | Tumor susceptibility gene 101 protein GN=Tsg101 PE=1 SV=2 - [TS101_MOUSE]                      | 0 | 5  | 0 | 6  | 0 | 8  | 0 | 19 | N/A | 1.991E-03 | 44.1            | ✓        |          |             |             |       |        | (23)               |          |  |  |  |  |  |  |  |  |  |
| 104 | A2AJ72    | A2AJ72 | Far upstream element (FUSE) binding protein 3 GN=Fubp3 PE=4 SV=1 - [A2AJ72_MOUSE]              | 0 | 5  | 0 | 7  | 0 | 7  | 0 | 19 | N/A | 6.852E-04 | 61.4            | ✓        |          |             |             |       |        |                    |          |  |  |  |  |  |  |  |  |  |
| 105 | Q55FM8-2  | RBM27  | Isoform 2 of RNA-binding protein 27 GN=Rbm27 - [RBM27_MOUSE]                                   | 0 | 7  | 0 | 4  | 0 | 7  | 0 | 18 | N/A | 3.883E-03 | 113             | ✓        |          |             |             |       | ✓      | (9)(19)(23)        |          |  |  |  |  |  |  |  |  |  |
| 106 | E9Q5E0    | E9Q5E0 | Mycocyte-specific enhancer factor 2D GN=Mef2d PE=4 SV=1 - [E9Q5E0_MOUSE]                       | 0 | 5  | 0 | 7  | 0 | 6  | 0 | 18 | N/A | 4.841E-04 | 54.1            | ✓        |          |             |             |       | ✓      |                    |          |  |  |  |  |  |  |  |  |  |
| 107 | P16675    | PPGB   | Lysosomal protective protein GN=Ctsa PE=1 SV=1 - [PPGB_MOUSE]                                  | 0 | 5  | 0 | 7  | 0 | 5  | 0 | 17 | N/A | 1.051E-03 | 53.8            |          |          |             | ✓           |       |        |                    | (17)     |  |  |  |  |  |  |  |  |  |
| 108 | Q61576    | FKBP10 | Peptidyl-prolyl cis-trans isomerase FKBP10 GN=Fkbp10 PE=1 SV=2 - [FKBP10_MOUSE]                | 0 | 6  | 0 | 8  | 0 | 3  | 0 | 17 | N/A | 1.754E-02 | 64.7            |          |          |             | ✓           |       |        |                    | (16)     |  |  |  |  |  |  |  |  |  |
| 109 | P09055    | ITB1   | Integrin beta-1 GN=Itgb1 PE=1 SV=1 - [ITB1_MOUSE]                                              | 0 | 4  | 0 | 7  | 0 | 6  | 0 | 17 | N/A | 3.016E-03 | 88.2            |          |          |             | ✓           |       |        |                    | (10)(16) |  |  |  |  |  |  |  |  |  |
| 110 | Q8CHY6    | P66A   | Transcriptional repressor p66 alpha GN=Gatad2a PE=1 SV=2 - [P66A_MOUSE]                        | 0 | 4  | 0 | 8  | 0 | 5  | 0 | 17 | N/A | 9.206E-03 | 67.3            | ✓        |          |             |             |       |        | (1)(12)(20)        |          |  |  |  |  |  |  |  |  |  |
| 111 | Q8R332-4  | NUPL1  | Isoform 4 of Nucleoporin p58/p45 GN=Nupl1 - [NUPL1_MOUSE]                                      | 0 | 5  | 0 | 8  | 0 | 4  | 0 | 17 | N/A | 9.206E-03 | 54.0            | ✓        |          |             |             |       |        |                    |          |  |  |  |  |  |  |  |  |  |
| 112 | Q3UGN9    | Q3UGN9 | Signal transducing adapter molecule 1 GN=Stam PE=2 SV=1 - [Q3UGN9_MOUSE]                       | 0 | 6  | 0 | 7  | 0 | 4  | 0 | 17 | N/A | 3.016E-03 | 51.1            | ✓        |          |             |             |       |        |                    |          |  |  |  |  |  |  |  |  |  |
| 113 | G3UWD2    | G3UWD2 | Runt related transcription factor 1, isoform CRA_c GN=Runx1 PE=4 SV=1 - [G3UWD2_MOUSE]         | 0 | 4  | 0 | 4  | 0 | 9  | 0 | 17 | N/A | 2.728E-02 | 48.6            | ✓        |          |             |             |       |        |                    |          |  |  |  |  |  |  |  |  |  |
| 114 | Q920A5    | RISC   | Retinoid-inducible serine carboxypeptidase GN=Scepep1 PE=2 SV=2 - [RISC_MOUSE]                 | 0 | 3  | 0 | 8  | 0 | 5  | 0 | 16 | N/A | 2.138E-02 | 50.9            |          |          |             | ✓           |       |        |                    | (17)     |  |  |  |  |  |  |  |  |  |

|         |           | GalNAz          |                                                                                                  |               |   |               |   |     |   |   |    |                               |           |             |                              |                                                        |      |               |            |                |                                                       |                                                     |
|---------|-----------|-----------------|--------------------------------------------------------------------------------------------------|---------------|---|---------------|---|-----|---|---|----|-------------------------------|-----------|-------------|------------------------------|--------------------------------------------------------|------|---------------|------------|----------------|-------------------------------------------------------|-----------------------------------------------------|
|         |           | Spectral Counts |                                                                                                  |               |   |               |   |     |   |   |    |                               |           |             |                              |                                                        |      |               |            |                |                                                       |                                                     |
|         |           | Ex-periment 1   |                                                                                                  | Ex-periment 2 |   | Ex-periment 3 |   | Sum |   |   |    |                               |           |             |                              |                                                        |      |               |            |                |                                                       |                                                     |
| N<br>o. | Accession | Gene            | Description                                                                                      | -             | + | -             | + | -   | + | - | +  | En-<br>rich-<br>ment<br>Ratio | t-test    | MW<br>[kDa] | Localization                 |                                                        |      |               |            |                | Previous O-<br>GlcNAc<br>Proteomics<br>Identification | Previous<br>Mucin Pro-<br>teomics<br>Identification |
|         |           |                 |                                                                                                  |               |   |               |   |     |   |   |    |                               |           |             | Exclusively<br>Intracellular | Exclusively<br>Extracellular,<br>Lysosomal,<br>Luminal | Both | 6AzGl<br>cNAc | GlcNA<br>z |                |                                                       |                                                     |
| 11      | Q6NZN0-5  | RBM26           | Isoform 5 of RNA-binding protein 26 GN=Rbm26 - [RBM26_MOUSE]                                     | 0             | 6 | 0             | 5 | 0   | 5 | 0 | 16 | N/A                           | 8.922E-05 | 111         | ✓                            |                                                        |      |               | ✓          | (9)(19)(23)    |                                                       |                                                     |
| 11      | Q501J7-2  | PHAR4           | Isoform 2 of Phosphatase and actin regulator 4 GN=Phactr4 - [PHAR4_MOUSE]                        | 0             | 6 | 0             | 5 | 0   | 5 | 0 | 16 | N/A                           | 8.922E-05 | 73.4        | ✓                            |                                                        |      |               |            | (23)           |                                                       |                                                     |
| 11      | P31230    | AIMP1           | Aminoacyl tRNA synthase complex-interacting multifunctional protein 1 GN=Aimp1 PE=1 SV           | 0             | 3 | 0             | 8 | 0   | 5 | 0 | 16 | N/A                           | 2.138E-02 | 34.0        |                              |                                                        | ✓    | ✓             | ✓          | (1)            |                                                       |                                                     |
| 11      | G5E8J9    | G5E8J9          | SCY1-like protein 2 GN=Scyl2 PE=4 SV=1 - [G5E8J9_MOUSE]                                          | 0             | 5 | 0             | 7 | 0   | 4 | 0 | 16 | N/A                           | 3.772E-03 | 103         |                              |                                                        | ✓    |               |            |                |                                                       |                                                     |
| 11      | Q99NB8    | UBQL4           | Ubiquilin-4 GN=Ubqln4 PE=1 SV=1 - [UBQL4_MOUSE]                                                  | 0             | 5 | 0             | 6 | 0   | 5 | 0 | 16 | N/A                           | 8.922E-05 | 63.5        | ✓                            |                                                        |      | ✓             | ✓          |                |                                                       |                                                     |
| 12      | Q99LI5    | ZN281           | Zinc finger protein 281 GN=Znf281 PE=1 SV=1 - [ZN281_MOUSE]                                      | 0             | 3 | 0             | 7 | 0   | 6 | 0 | 16 | N/A                           | 1.135E-02 | 96.6        | ✓                            |                                                        |      |               |            |                |                                                       |                                                     |
| 12      | O70494-2  | SP3             | Isoform 2 of Transcription factor Sp3 GN=Sp3 - [SP3_MOUSE]                                       | 0             | 5 | 0             | 5 | 0   | 6 | 0 | 16 | N/A                           | 8.922E-05 | 78.3        | ✓                            |                                                        |      |               | ✓          |                |                                                       |                                                     |
| 12      | Q9JLV1    | BAG3            | BAG family molecular chaperone regulator 3 GN=Bag3 PE=1 SV=2 - [BAG3_MOUSE]                      | 0             | 4 | 0             | 4 | 0   | 7 | 0 | 15 | N/A                           | 7.490E-03 | 61.8        | ✓                            |                                                        |      | ✓             | ✓          | (9)(23)(26)    | (17)                                                  |                                                     |
| 12      | P27046    | MA2A1           | Alpha-mannosidase 2 GN=Man2a1 PE=1 SV=2 - [MA2A1_MOUSE]                                          | 0             | 5 | 0             | 6 | 0   | 4 | 0 | 15 | N/A                           | 9.781E-04 | 132         |                              |                                                        | ✓    |               |            |                | (16)(17)                                              |                                                     |
| 12      | Q6NXI6-2  | RPRD2           | Isoform 2 of Regulation of nuclear pre-mRNA domain-containing protein 2 GN=Rprd2 - [RPRD2_MOUSE] | 0             | 5 | 0             | 5 | 0   | 5 | 0 | 15 | N/A                           | 0.000E+00 | 151         | ✓                            |                                                        |      |               |            | (9)(23)        |                                                       |                                                     |
| 12      | P28659-2  | CELF1           | Isoform 2 of CUGBP Elav-like family member 1 GN=Celf1 - [CELF1_MOUSE]                            | 0             | 4 | 0             | 6 | 0   | 5 | 0 | 15 | N/A                           | 9.781E-04 | 51.6        | ✓                            |                                                        |      |               |            | (9)(23)        |                                                       |                                                     |
| 12      | Q8CHS8    | VP37A           | Vacuolar protein sorting-associated protein 37A GN=Vps37a PE=2 SV=1 - [VP37A_MOUSE]              | 0             | 4 | 0             | 4 | 0   | 7 | 0 | 15 | N/A                           | 7.490E-03 | 44.4        | ✓                            |                                                        |      |               |            |                |                                                       |                                                     |
| 12      | E9Q1T9    | E9Q1T9          | Exportin-2 GN=Cse11 PE=4 SV=1 - [E9Q1T9_MOUSE]                                                   | 0             | 6 | 0             | 3 | 0   | 6 | 0 | 15 | N/A                           | 7.490E-03 | 104         | ✓                            |                                                        |      |               |            |                |                                                       |                                                     |
| 12      | P10493    | NID1            | Nidogen-1 GN=Nid1 PE=1 SV=2 - [NID1_MOUSE]                                                       | 0             | 4 | 0             | 6 | 0   | 4 | 0 | 14 | N/A                           | 2.192E-03 | 137         |                              | ✓                                                      |      |               |            |                | (7)(15)(16)(17)                                       |                                                     |
| 12      | P11438    | LAMP1           | Lysosome-associated membrane glycoprotein 1 GN=Lamp1 PE=1 SV=2 - [LAMP1_MOUSE]                   | 0             | 4 | 0             | 5 | 0   | 5 | 0 | 14 | N/A                           | 1.510E-04 | 43.8        |                              | ✓                                                      |      | ✓             | (9)(23)    | (3)(15)(16)    |                                                       |                                                     |
| 13      | Q91YQ5    | RPN1            | Dolichyl-diphosphooligosaccharide--protein glycosyltransferase subunit 1 GN=Rpn1 PE=2 SV         | 0             | 2 | 0             | 7 | 0   | 5 | 0 | 14 | N/A                           | 3.253E-02 | 68.5        |                              |                                                        | ✓    |               |            | (9)(23)        | (16)                                                  |                                                     |
| 13      | P11087-2  | CO1A1           | Isoform 2 of Collagen alpha-1(I) chain GN=Col1a1 - [CO1A1_MOUSE]                                 | 0             | 4 | 0             | 7 | 0   | 3 | 0 | 14 | N/A                           | 1.780E-02 | 118         |                              | ✓                                                      |      |               |            | (26)           | (16)                                                  |                                                     |
| 13      | Q4PZA2-3  | ECE1            | Isoform C of Endothelin-converting enzyme 1 GN=Ece1 - [ECE1_MOUSE]                               | 0             | 6 | 0             | 5 | 0   | 3 | 0 | 14 | N/A                           | 6.122E-03 | 85.4        |                              |                                                        | ✓    |               |            |                |                                                       |                                                     |
| 13      | K3W4Q8    | K3W4Q8          | Basigin GN=Bsg PE=4 SV=1 - [K3W4Q8_MOUSE]                                                        | 0             | 5 | 0             | 6 | 0   | 3 | 0 | 14 | N/A                           | 6.122E-03 | 24.1        |                              |                                                        | ✓    |               |            |                |                                                       |                                                     |
| 13      | P97863-3  | NFIB            | Isoform 3 of Nuclear factor 1 B-type GN=Nfib - [NFIB_MOUSE]                                      | 0             | 4 | 0             | 3 | 0   | 7 | 0 | 14 | N/A                           | 1.780E-02 | 47.4        | ✓                            |                                                        |      |               |            |                |                                                       |                                                     |
| 13      | E9QKL6    | E9QKL6          | Interferon-activable protein 204 GN=Ifi204 PE=4 SV=1 - [E9QKL6_MOUSE]                            | 0             | 4 | 0             | 6 | 0   | 4 | 0 | 14 | N/A                           | 2.192E-03 | 69.4        | ✓                            |                                                        |      |               |            |                |                                                       |                                                     |
| 13      | Q9R045    | ANGL2           | Angiotensin-converting enzyme 2 GN=Angptl2 PE=2 SV=2 - [ANGL2_MOUSE]                             | 0             | 3 | 0             | 7 | 0   | 3 | 0 | 13 | N/A                           | 3.138E-02 | 57.1        |                              |                                                        | ✓    |               |            |                |                                                       |                                                     |
| 13      | Q00493    | CBPE            | Carboxypeptidase E GN=Cpe PE=1 SV=2 - [CBPE_MOUSE]                                               | 0             | 3 | 0             | 5 | 0   | 5 | 0 | 13 | N/A                           | 2.890E-03 | 53.2        |                              | ✓                                                      |      |               |            |                |                                                       |                                                     |
| 13      | Q99LA2    | Q99LA2          | Protein Zfp207 GN=Zfp207 PE=2 SV=1 - [Q99LA2_MOUSE]                                              | 0             | 3 | 0             | 5 | 0   | 5 | 0 | 13 | N/A                           | 2.890E-03 | 49.8        | ✓                            |                                                        |      |               | ✓          |                |                                                       |                                                     |
| 13      | E9Q7C1    | E9Q7C1          | Mediator of RNA polymerase II transcription subunit 15 GN=Med15 PE=4 SV=1 - [E9Q7C1_MOUSE]       | 0             | 6 | 0             | 2 | 0   | 5 | 0 | 13 | N/A                           | 2.265E-02 | 82.5        | ✓                            |                                                        |      |               | ✓          |                |                                                       |                                                     |
| 14      | Q9Z1F9    | SAE2            | SUMO-activating enzyme subunit 2 GN=Uba2 PE=2 SV=1 - [SAE2_MOUSE]                                | 0             | 5 | 0             | 4 | 0   | 3 | 0 | 12 | N/A                           | 2.278E-03 | 70.5        | ✓                            |                                                        |      | ✓             | ✓          | (26)           |                                                       |                                                     |
| 14      | Q8R180    | ERO1A           | ERO1-like protein alpha GN=Ero1 PE=1 SV=2 - [ERO1A_MOUSE]                                        | 0             | 3 | 0             | 4 | 0   | 5 | 0 | 12 | N/A                           | 2.278E-03 | 54.1        |                              | ✓                                                      |      |               |            | (23)           |                                                       |                                                     |
| 14      | Q3UCQ1    | FOXK2           | Forkhead box protein K2 GN=Foxk2 PE=2 SV=3 - [FOXK2_MOUSE]                                       | 0             | 2 | 0             | 5 | 0   | 5 | 0 | 12 | N/A                           | 1.613E-02 | 68.4        | ✓                            |                                                        |      |               |            | (1)(9)(20)(23) |                                                       |                                                     |
| 14      | Q02614    | S30BP           | SAP30-binding protein GN=Sap30bp PE=2 SV=2 - [S30BP_MOUSE]                                       | 0             | 4 | 0             | 4 | 0   | 4 | 0 | 12 | N/A                           | 0.000E+00 | 33.8        | ✓                            |                                                        |      |               |            | (1)(20)(23)    |                                                       |                                                     |
| 14      | P97797-2  | SHPS1           | Isoform 2 of Tyrosine-protein phosphatase non-receptor type substrate 1 GN=Sirpa - [SHPS1_MOUSE] | 0             | 4 | 0             | 3 | 0   | 5 | 0 | 12 | N/A                           | 2.278E-03 | 56.0        |                              |                                                        | ✓    |               |            |                |                                                       |                                                     |
| 14      | P24668    | MPRD            | Cation-dependent mannose-6-phosphate receptor GN=M6pr PE=1 SV=1 - [MPRD_MOUSE]                   | 0             | 4 | 0             | 3 | 0   | 5 | 0 | 12 | N/A                           | 2.278E-03 | 31.2        |                              |                                                        | ✓    |               |            |                |                                                       |                                                     |
| 14      | Q8BIH0-2  | SP130           | Isoform 2 of Histone deacetylase complex subunit SAP130 GN=Sap130 - [SP130_MOUSE]                | 0             | 5 | 0             | 3 | 0   | 4 | 0 | 12 | N/A                           | 2.278E-03 | 92.8        | ✓                            |                                                        |      |               | ✓          |                |                                                       |                                                     |
| 14      | Q04887    | SOX9            | Transcription factor SOX-9 GN=Sox9 PE=2 SV=2 - [SOX9_MOUSE]                                      | 0             | 3 | 0             | 3 | 0   | 6 | 0 | 12 | N/A                           | 1.613E-02 | 56.0        | ✓                            |                                                        |      |               |            |                |                                                       |                                                     |
| 14      | F6TWX0    | F6TWX0          | Nuclear transcription factor Y subunit alpha (Fragment) GN=Nfya PE=4 SV=1 - [F6TWX0_MOUSE]       | 0             | 6 | 0             | 3 | 0   | 3 | 0 | 12 | N/A                           | 1.613E-02 | 22.7        | ✓                            |                                                        |      |               | ✓          |                |                                                       |                                                     |
| 14      | P51569    | AGAL            | Alpha-galactosidase A GN=Gla PE=1 SV=1 - [AGAL_MOUSE]                                            | 0             | 2 | 0             | 4 | 0   | 5 | 0 | 11 | N/A                           | 1.417E-02 | 47.6        |                              | ✓                                                      |      |               |            |                | (17)                                                  |                                                     |
| 15      | Q3TJD7    | PDLI7           | PDZ and LIM domain protein 7 GN=Pdlim7 PE=2 SV=1 - [PDLI7_MOUSE]                                 | 0             | 3 | 0             | 4 | 0   | 4 | 0 | 11 | N/A                           | 3.882E-04 | 50.1        | ✓                            |                                                        |      |               |            | (16)           |                                                       |                                                     |
| 15      | Q02819    | NUCB1           | Nucleobindin-1 GN=Nucb1 PE=1 SV=2 - [NUCB1_MOUSE]                                                | 0             | 2 | 0             | 4 | 0   | 5 | 0 | 11 | N/A                           | 1.417E-02 | 53.4        |                              | ✓                                                      |      |               |            | (9)(20)(23)    | (15)(16)(17)                                          |                                                     |
| 15      | Q62348    | TSN             | Translin GN=Tsn PE=1 SV=1 - [TSN_MOUSE]                                                          | 0             | 4 | 0             | 4 | 0   | 3 | 0 | 11 | N/A                           | 3.882E-04 | 26.2        | ✓                            |                                                        |      | ✓             | ✓          | (9)(23)(26)    |                                                       |                                                     |
| 15      | Q9JKP5    | MBNL1           | Muscleblind-like protein 1 GN=Mbnl1 PE=1 SV=1 - [MBNL1_MOUSE]                                    | 0             | 2 | 0             | 6 | 0   | 3 | 0 | 11 | N/A                           | 3.800E-02 | 37.0        | ✓                            |                                                        |      | ✓             | ✓          | (9)(23)        |                                                       |                                                     |
| 15      | Q91W59-2  | RBMS1           | Isoform 2 of RNA-binding motif, single-stranded-interacting protein 1 GN=Rbms1 - [RBMS1_MOUSE]   | 0             | 2 | 0             | 6 | 0   | 3 | 0 | 11 | N/A                           | 3.800E-02 | 40.0        | ✓                            |                                                        |      |               |            | (9)(23)        |                                                       |                                                     |
| 15      | Q62203    | SF3A2           | Splicing factor 3A subunit 2 GN=Sf3a2 PE=2 SV=2 - [SF3A2_MOUSE]                                  | 0             | 5 | 0             | 2 | 0   | 4 | 0 | 11 | N/A                           | 1.417E-02 | 49.9        | ✓                            |                                                        |      |               |            | (9)(23)        |                                                       |                                                     |
| 15      | P05627    | JUN             | Transcription factor AP-1 GN=Jun PE=1 SV=3 - [JUN_MOUSE]                                         | 0             | 2 | 0             | 5 | 0   | 4 | 0 | 11 | N/A                           | 1.417E-02 | 35.9        | ✓                            |                                                        |      |               | ✓          | (9)(23)        |                                                       |                                                     |
| 15      | Q9R0P5    | DEST            | Destrin GN=Dstn PE=1 SV=3 - [DEST_MOUSE]                                                         | 0             | 4 | 0             | 3 | 0   | 4 | 0 | 11 | N/A                           | 3.882E-04 | 18.5        | ✓                            |                                                        |      | ✓             | ✓          | (26)           |                                                       |                                                     |

| GalNAz          |           |        |                                                                                               |                 |               |               |     |                           |                                               |      |           |                  |           |          |              |   |   |   |                                             |                                          |             |
|-----------------|-----------|--------|-----------------------------------------------------------------------------------------------|-----------------|---------------|---------------|-----|---------------------------|-----------------------------------------------|------|-----------|------------------|-----------|----------|--------------|---|---|---|---------------------------------------------|------------------------------------------|-------------|
| Spectral Counts |           |        |                                                                                               |                 |               |               |     |                           |                                               |      |           |                  |           |          |              |   |   |   |                                             |                                          |             |
| No.             | Accession | Gene   | Description                                                                                   | Spectral Counts |               |               |     |                           |                                               |      |           | Enrichment Ratio | t-test    | MW [kDa] | Localization |   |   |   | Previous O-GlcNAc Proteomics Identification | Previous Mucin Proteomics Identification |             |
|                 |           |        |                                                                                               | Ex-periment 1   | Ex-periment 2 | Ex-periment 3 | Sum | Exclusively Intracellular | Exclusively Extracellular, Lysosomal, Luminal | Both | 6AzGlcNAc |                  |           |          |              |   |   |   |                                             |                                          |             |
| 15f             | Q8K3X4    | I2BPL  | Interferon regulatory factor 2-binding protein-like GN=Irf2bpl PE=1 SV=1 - [I2BPL_MOUSE]      | 0               | 3             | 0             | 4   | 0                         | 4                                             | 0    | 11        | N/A              | 3.882E-04 | 80.5     | ✓            |   |   |   | (1)(20)(23)                                 |                                          |             |
| 15f             | E9PZ00    | E9PZ00 | Sulfated glycoprotein 1 GN=Psap PE=4 SV=1 - [E9PZ00_MOUSE]                                    | 0               | 3             | 0             | 4   | 0                         | 4                                             | 0    | 11        | N/A              | 3.882E-04 | 60.6     |              | ✓ |   |   |                                             |                                          |             |
| 16f             | Q8BP71-5  | RFOX2  | Isoform 5 of RNA binding protein fox-1 homolog 2 GN=Rbfox2 - [RFOX2_MOUSE]                    | 0               | 3             | 0             | 3   | 0                         | 5                                             | 0    | 11        | N/A              | 5.328E-03 | 46.2     | ✓            |   |   |   |                                             |                                          |             |
| 16f             | Q60929-2  | MEF2A  | Isoform 2 of Myocyte-specific enhancer factor 2A GN=Mef2a - [MEF2A_MOUSE]                     | 0               | 3             | 0             | 4   | 0                         | 4                                             | 0    | 11        | N/A              | 3.882E-04 | 52.6     | ✓            |   |   |   | ✓                                           |                                          |             |
| 16f             | Q5NCM6    | Q5NCM6 | Epsin 2 GN=Epn2 PE=2 SV=1 - [Q5NCM6_MOUSE]                                                    | 0               | 3             | 0             | 6   | 0                         | 2                                             | 0    | 11        | N/A              | 3.800E-02 | 61.6     | ✓            |   |   |   |                                             |                                          |             |
| 16f             | Q3UMF0-4  | COBL1  | Isoform 4 of Cordon-bleu protein-like 1 GN=Cobl1 - [COBL1_MOUSE]                              | 0               | 3             | 0             | 3   | 0                         | 5                                             | 0    | 11        | N/A              | 5.328E-03 | 130      | ✓            |   |   | ✓ | ✓                                           |                                          |             |
| 16f             | Q9WV54    | ASAH1  | Acid ceramidase GN=Asah1 PE=1 SV=1 - [ASAH1_MOUSE]                                            | 0               | 4             | 0             | 4   | 0                         | 2                                             | 0    | 10        | N/A              | 7.490E-03 | 44.6     |              | ✓ |   |   |                                             | (17)                                     |             |
| 16f             | Q3TCN2-2  | PLBL2  | Isoform 2 of Putative phospholipase B-like 2 GN=Plbd2 - [PLBL2_MOUSE]                         | 0               | 3             | 0             | 4   | 0                         | 3                                             | 0    | 10        | N/A              | 5.620E-04 | 49.9     |              | ✓ |   |   |                                             | (17)                                     |             |
| 16f             | P17439    | GLCM   | Glucosylceramidase GN=Gba PE=1 SV=1 - [GLCM_MOUSE]                                            | 0               | 2             | 0             | 5   | 0                         | 3                                             | 0    | 10        | N/A              | 1.944E-02 | 57.6     |              | ✓ |   |   |                                             | (17)                                     |             |
| 16f             | Q80W68-2  | KIRR1  | Isoform 2 of Kin of IRRE-like protein 1 GN=Kirrel - [KIRR1_MOUSE]                             | 0               | 2             | 0             | 3   | 0                         | 5                                             | 0    | 10        | N/A              | 1.944E-02 | 69.9     |              |   | ✓ |   |                                             | (16)                                     |             |
| 16f             | P15379-2  | CD44   | Isoform 13 of CD44 antigen GN=Cd44 - [CD44_MOUSE]                                             | 0               | 2             | 0             | 3   | 0                         | 5                                             | 0    | 10        | N/A              | 1.944E-02 | 40.0     |              |   | ✓ | ✓ | (9)(23)                                     | (10)(16)                                 |             |
| 16f             | P42227-2  | STAT3  | Isoform Stat3B of Signal transducer and activator of transcription 3 GN=Stat3 - [STAT3_MOUSE] | 0               | 4             | 0             | 3   | 0                         | 3                                             | 0    | 10        | N/A              | 5.620E-04 | 83.1     | ✓            |   |   | ✓ |                                             | (9)(23)                                  |             |
| 17f             | Q99KP6    | PRP19  | Pre-mRNA-processing factor 19 GN=Prpf19 PE=2 SV=1 - [PRP19_MOUSE]                             | 0               | 3             | 0             | 4   | 0                         | 3                                             | 0    | 10        | N/A              | 5.620E-04 | 55.2     | ✓            |   |   |   |                                             | (23)                                     |             |
| 17f             | A2AA71    | A2AA71 | Protein transport protein Sec24A GN=Sec24a PE=4 SV=1 - [A2AA71_MOUSE]                         | 0               | 3             | 0             | 3   | 0                         | 4                                             | 0    | 10        | N/A              | 5.620E-04 | 119      | ✓            |   |   |   |                                             | (2)                                      |             |
| 17f             | P57716    | NICA   | Nicastrin GN=Ncstn PE=1 SV=3 - [NICA_MOUSE]                                                   | 0               | 5             | 0             | 2   | 0                         | 3                                             | 0    | 10        | N/A              | 1.944E-02 | 78.4     |              | ✓ |   |   |                                             |                                          |             |
| 17f             | P21956-2  | MFGM   | Isoform 2 of Lactadherin GN=Mfge8 - [MFGM_MOUSE]                                              | 0               | 4             | 0             | 3   | 0                         | 3                                             | 0    | 10        | N/A              | 5.620E-04 | 47.1     |              | ✓ |   |   |                                             |                                          |             |
| 17f             | E9Q6C7    | E9Q6C7 | Latrophilin-2 GN=Lphn2 PE=3 SV=1 - [E9Q6C7_MOUSE]                                             | 0               | 4             | 0             | 3   | 0                         | 3                                             | 0    | 10        | N/A              | 5.620E-04 | 167      |              |   | ✓ |   |                                             |                                          |             |
| 17f             | D3YYT0    | D3YYT0 | Cadherin-2 GN=Cdh2 PE=3 SV=1 - [D3YYT0_MOUSE]                                                 | 0               | 3             | 0             | 3   | 0                         | 4                                             | 0    | 10        | N/A              | 5.620E-04 | 93.8     |              |   | ✓ |   |                                             |                                          |             |
| 17f             | Q99LJ0    | CT2NL  | CTTNBP2 N-terminal-like protein GN=Ctnbp2nl PE=1 SV=1 - [CT2NL_MOUSE]                         | 0               | 4             | 0             | 3   | 0                         | 3                                             | 0    | 10        | N/A              | 5.620E-04 | 69.8     | ✓            |   |   |   |                                             |                                          |             |
| 17f             | Q3UMF0-3  | COBL1  | Isoform 3 of Cordon-bleu protein-like 1 GN=Cobl1 - [COBL1_MOUSE]                              | 0               | 3             | 0             | 3   | 0                         | 4                                             | 0    | 10        | N/A              | 5.620E-04 | 129      | ✓            |   |   | ✓ | ✓                                           |                                          |             |
| 17f             | Q3U4W8    | Q3U4W8 | Ubiquitin carboxyl-terminal hydrolase GN=Usp5 PE=2 SV=1 - [Q3U4W8_MOUSE]                      | 0               | 4             | 0             | 4   | 0                         | 2                                             | 0    | 10        | N/A              | 7.490E-03 | 93.3     | ✓            |   |   | ✓ |                                             |                                          |             |
| 17f             | Q00422    | GABPA  | GA-binding protein alpha chain GN=Gabpa PE=1 SV=2 - [GABPA_MOUSE]                             | 0               | 3             | 0             | 2   | 0                         | 5                                             | 0    | 10        | N/A              | 1.944E-02 | 51.3     | ✓            |   |   |   |                                             |                                          |             |
| 18f             | D3Z191    | D3Z191 | Transmembrane protein 106B (Fragment) GN=Tmem106b PE=4 SV=1 - [D3Z191_MOUSE]                  | 0               | 4             | 0             | 2   | 0                         | 4                                             | 0    | 10        | N/A              | 7.490E-03 | 20.8     | ✓            |   |   |   |                                             |                                          |             |
| 18f             | O35405    | PLD3   | Phospholipase D3 GN=Pld3 PE=2 SV=1 - [PLD3_MOUSE]                                             | 0               | 2             | 0             | 4   | 0                         | 3                                             | 0    | 9         | N/A              | 6.533E-03 | 54.4     |              | ✓ |   |   |                                             | (9)(23)                                  | (17)        |
| 18f             | O89023    | TPP1   | Tripeptidyl-peptidase 1 GN=Tpp1 PE=1 SV=2 - [TPP1_MOUSE]                                      | 0               | 3             | 0             | 4   | 0                         | 2                                             | 0    | 9         | N/A              | 6.533E-03 | 61.3     |              | ✓ |   |   |                                             | (17)                                     |             |
| 18f             | Q99K90    | TAB2   | TGF-beta-activated kinase 1 and MAP3K7-binding protein 2 GN=Tab2 PE=1 SV=1 - [TAB2_MOUSE]     | 0               | 3             | 0             | 2   | 0                         | 4                                             | 0    | 9         | N/A              | 6.533E-03 | 76.4     | ✓            |   |   |   |                                             | (9)(23)                                  |             |
| 18f             | Q60838    | DVL2   | Segment polarity protein dishevelled homolog DVL-2 GN=Dvl2 PE=1 SV=2 - [DVL2_MOUSE]           | 0               | 4             | 0             | 2   | 0                         | 3                                             | 0    | 9         | N/A              | 6.533E-03 | 78.8     | ✓            |   |   |   |                                             | (9)(23)                                  |             |
| 18f             | Q9QXS6-3  | DREB   | Isoform E2 of Drebrin GN=Dbn1 - [DREB_MOUSE]                                                  | 0               | 5             | 0             | 2   | 0                         | 2                                             | 0    | 9         | N/A              | 3.994E-02 | 72.4     | ✓            |   |   | ✓ | ✓                                           | (23)                                     |             |
| 18f             | Q99KF1    | TMED9  | Transmembrane emp24 domain-containing protein 9 GN=Tmed9 PE=2 SV=2 - [TMED9_MOUSE]            | 0               | 4             | 0             | 1   | 0                         | 4                                             | 0    | 9         | N/A              | 3.994E-02 | 27.1     |              |   | ✓ |   |                                             |                                          |             |
| 18f             | Q91XX1    | Q91XX1 | Protein Pcdhga11 GN=Pcdhgc3 PE=2 SV=1 - [Q91XX1_MOUSE]                                        | 0               | 2             | 0             | 5   | 0                         | 2                                             | 0    | 9         | N/A              | 3.994E-02 | 101      |              |   | ✓ |   |                                             |                                          |             |
| 18f             | Q3TW96    | UAP1L  | UDP-N-acetylhexosamine pyrophosphorylase-like protein 1 GN=Uap1l1 PE=2 SV=1 - [UAP1L_MOUSE]   | 0               | 3             | 0             | 4   | 0                         | 2                                             | 0    | 9         | N/A              | 6.533E-03 | 56.6     | ✓            |   |   | ✓ | ✓                                           |                                          |             |
| 18f             | Q3TQ29    | Q3TQ29 | Pumilio homolog 2 GN=Pum2 PE=2 SV=1 - [Q3TQ29_MOUSE]                                          | 0               | 4             | 0             | 3   | 0                         | 2                                             | 0    | 9         | N/A              | 6.533E-03 | 106      | ✓            |   |   |   |                                             |                                          |             |
| 19f             | G3X8Q0    | G3X8Q0 | Trans-acting transcription factor 1 GN=Sp1 PE=4 SV=1 - [G3X8Q0_MOUSE]                         | 0               | 2             | 0             | 4   | 0                         | 3                                             | 0    | 9         | N/A              | 6.533E-03 | 80.4     | ✓            |   |   | ✓ | ✓                                           |                                          |             |
| 19f             | E9QKG6    | E9QKG6 | Ankyrin repeat domain-containing protein 17 GN=Ankrd17 PE=4 SV=1 - [E9QKG6_MOUSE]             | 0               | 3             | 0             | 2   | 0                         | 4                                             | 0    | 9         | N/A              | 6.533E-03 | 247      | ✓            |   |   |   |                                             |                                          |             |
| 19f             | P17047    | LAMP2  | Lysosome-associated membrane glycoprotein 2 GN=Lamp2 PE=2 SV=2 - [LAMP2_MOUSE]                | 0               | 2             | 0             | 3   | 0                         | 3                                             | 0    | 8         | N/A              | 1.324E-03 | 45.7     |              |   | ✓ |   | ✓                                           | (9)(23)                                  | (3)(16)(17) |
| 19f             | Q9Z247    | FKBP9  | Peptidyl-prolyl cis-trans isomerase FKBP9 GN=Fkbp9 PE=1 SV=1 - [FKBP9_MOUSE]                  | 0               | 2             | 0             | 3   | 0                         | 3                                             | 0    | 8         | N/A              | 1.324E-03 | 63.0     |              | ✓ |   |   |                                             | (17)                                     |             |
| 19f             | Q07797    | LG3BP  | Galectin-3-binding protein GN=Lgals3bp PE=1 SV=1 - [LG3BP_MOUSE]                              | 0               | 2             | 0             | 2   | 0                         | 4                                             | 0    | 8         | N/A              | 1.613E-02 | 64.4     |              | ✓ |   |   |                                             | (16)(17)                                 |             |
| 19f             | Q9EQQ9    | NCOAT  | Bifunctional protein NCOAT GN=Mgea5 PE=1 SV=2 - [NCOAT_MOUSE]                                 | 0               | 2             | 0             | 2   | 0                         | 4                                             | 0    | 8         | N/A              | 1.613E-02 | 103      | ✓            |   |   |   |                                             | (23)                                     | (16)        |
| 19f             | Q8K297    | GT251  | Procollagen galactosyltransferase 1 GN=Glt25d1 PE=1 SV=2 - [GT251_MOUSE]                      | 0               | 3             | 0             | 2   | 0                         | 3                                             | 0    | 8         | N/A              | 1.324E-03 | 71.0     |              | ✓ |   |   |                                             | (16)                                     |             |
| 19f             | Q05186    | RCN1   | Reticulocalbin-1 GN=Rcn1 PE=1 SV=1 - [RCN1_MOUSE]                                             | 0               | 2             | 0             | 3   | 0                         | 3                                             | 0    | 8         | N/A              | 1.324E-03 | 38.1     |              | ✓ |   |   |                                             | (16)                                     |             |
| 19f             | Q08093    | CNN2   | Calponin-2 GN=Cnn2 PE=2 SV=1 - [CNN2_MOUSE]                                                   | 0               | 3             | 0             | 2   | 0                         | 3                                             | 0    | 8         | N/A              | 1.324E-03 | 33.1     | ✓            |   |   | ✓ | ✓                                           | (9)(23)(26)                              |             |
| 19f             | P51859    | HDGF   | Hepatoma-derived growth factor GN=Hdgf PE=1 SV=2 - [HDGF_MOUSE]                               | 0               | 4             | 0             | 2   | 0                         | 2                                             | 0    | 8         | N/A              | 1.613E-02 | 26.3     | ✓            |   |   | ✓ | ✓                                           | (9)(23)(26)                              |             |
| 20f             | Q8BU11    | TOX4   | TOX high mobility group box family member 4 GN=Tox4 PE=1 SV=3 - [TOX4_MOUSE]                  | 0               | 2             | 0             | 4   | 0                         | 2                                             | 0    | 8         | N/A              | 1.613E-02 | 65.9     | ✓            |   |   |   |                                             | (9)(23)                                  |             |

| GalNAz          |               |               |     |
|-----------------|---------------|---------------|-----|
| Spectral Counts |               |               |     |
| Ex-periment 1   | Ex-periment 2 | Ex-periment 3 | Sum |

| No. | Accession | Gene   | Description                                                                                    | Spectral Counts |   |   |   |   |   |   |   | En-richment Ratio | t-test    | MW [kDa] | Localization              |                                               |      |           | Previous O-GlcNAc Proteomics Identification | Previous Mucin Proteomics Identification |
|-----|-----------|--------|------------------------------------------------------------------------------------------------|-----------------|---|---|---|---|---|---|---|-------------------|-----------|----------|---------------------------|-----------------------------------------------|------|-----------|---------------------------------------------|------------------------------------------|
|     |           |        |                                                                                                | -               | + | - | + | - | + | - | + |                   |           |          | Exclusively Intracellular | Exclusively Extracellular, Lysosomal, Luminal | Both | 6AzGlcNAc |                                             |                                          |
| 201 | Q8R3V5-1  | SHLB2  | Isoform 1 of Endophilin-B2 GN=Sh3glb2 - [SHLB2_MOUSE]                                          | 0               | 3 | 0 | 2 | 0 | 3 | 0 | 8 | N/A               | 1.324E-03 | 44.1     | ✓                         |                                               |      |           | (5)                                         |                                          |
| 202 | Q00560    | IL6RB  | Interleukin-6 receptor subunit beta GN=Il6st PE=1 SV=2 - [IL6RB_MOUSE]                         | 0               | 2 | 0 | 4 | 0 | 2 | 0 | 8 | N/A               | 1.613E-02 | 102      |                           |                                               | ✓    |           | (20)                                        |                                          |
| 203 | Q7TT18    | MCAF1  | Activating transcription factor 7-interacting protein 1 GN=Atf7ip PE=1 SV=1 - [MCAF1_MOUSE]    | 0               | 2 | 0 | 3 | 0 | 3 | 0 | 8 | N/A               | 1.324E-03 | 139      | ✓                         |                                               |      |           | (1)(23)                                     |                                          |
| 204 | Q9R1J0    | NSDHL  | Sterol-4-alpha-carboxylate 3-dehydrogenase, decarboxylating GN=Nsdhl PE=2 SV=1 - [NSDHL_MOUSE] | 0               | 3 | 0 | 2 | 0 | 3 | 0 | 8 | N/A               | 1.324E-03 | 40.7     |                           | ✓                                             |      |           | ✓                                           |                                          |
| 205 | Q5SVW9    | Q5SVW9 | Transmembrane emp24 domain-containing protein 4 (Fragment) GN=Tmed4 PE=2 SV=1 - [C...]         | 0               | 2 | 0 | 4 | 0 | 2 | 0 | 8 | N/A               | 1.613E-02 | 19.1     |                           | ✓                                             |      |           |                                             |                                          |
| 206 | A2ACG7    | A2ACG7 | Dolichyl-diphosphooligosaccharide--protein glycosyltransferase subunit 2 GN=Rpn2 PE=4 SV=0     | 0               | 2 | 0 | 4 | 0 | 2 | 0 | 8 | N/A               | 1.613E-02 | 67.5     |                           | ✓                                             |      |           |                                             |                                          |
| 207 | Q9CY50    | SSRA   | Translocon-associated protein subunit alpha GN=Ssr1 PE=1 SV=1 - [SSRA_MOUSE]                   | 0               | 3 | 0 | 3 | 0 | 2 | 0 | 8 | N/A               | 1.324E-03 | 32.0     |                           |                                               | ✓    |           |                                             |                                          |
| 208 | Q64314    | CD34   | Hematopoietic progenitor cell antigen CD34 GN=Cd34 PE=1 SV=1 - [CD34_MOUSE]                    | 0               | 3 | 0 | 2 | 0 | 3 | 0 | 8 | N/A               | 1.324E-03 | 41.0     |                           |                                               | ✓    |           |                                             |                                          |
| 209 | Q02780-2  | NFIA   | Isoform 1 of Nuclear factor 1 A-type GN=Nfia - [NFIA_MOUSE]                                    | 0               | 2 | 0 | 2 | 0 | 4 | 0 | 8 | N/A               | 1.613E-02 | 49.9     | ✓                         |                                               |      |           |                                             |                                          |
| 210 | E9Q1U8    | E9Q1U8 | Transcription intermediary factor 1-alpha GN=Trim24 PE=4 SV=1 - [E9Q1U8_MOUSE]                 | 0               | 2 | 0 | 3 | 0 | 3 | 0 | 8 | N/A               | 1.324E-03 | 110      | ✓                         |                                               |      |           |                                             |                                          |
| 211 | D3Z0T0    | D3Z0T0 | Transcription initiation factor TFIIID subunit 6 GN=Taf6 PE=4 SV=1 - [D3Z0T0_MOUSE]            | 0               | 2 | 0 | 2 | 0 | 4 | 0 | 8 | N/A               | 1.613E-02 | 69.8     | ✓                         |                                               |      |           |                                             |                                          |
| 212 | Q61398    | PCOC1  | Procollagen C-endopeptidase enhancer 1 GN=Pcolce PE=1 SV=2 - [PCOC1_MOUSE]                     | 0               | 2 | 0 | 3 | 0 | 2 | 0 | 7 | N/A               | 2.192E-03 | 50.1     |                           | ✓                                             |      |           |                                             | (17)                                     |
| 213 | Q61810-2  | LTBP3  | Isoform 2 of Latent-transforming growth factor beta-binding protein 3 GN=Ltbp3 - [LTBP3_MOUSE] | 0               | 3 | 0 | 2 | 0 | 2 | 0 | 7 | N/A               | 2.192E-03 | 93.3     |                           | ✓                                             |      |           |                                             | (16)                                     |
| 214 | Q8VBZ3    | CLPT1  | Cleft lip and palate transmembrane protein 1 homolog GN=Clptm1 PE=1 SV=1 - [CLPT1_MOUSE]       | 0               | 2 | 0 | 3 | 0 | 2 | 0 | 7 | N/A               | 2.192E-03 | 75.2     |                           |                                               | ✓    |           |                                             | (16)                                     |
| 215 | F6VSK8    | F6VSK8 | Integrin alpha-6 (Fragment) GN=Itga6 PE=3 SV=1 - [F6VSK8_MOUSE]                                | 0               | 2 | 0 | 2 | 0 | 3 | 0 | 7 | N/A               | 2.192E-03 | 75.0     |                           |                                               | ✓    |           |                                             | (10)                                     |
| 216 | Q9JKV1    | ADRM1  | Proteasomal ubiquitin receptor ADRM1 GN=Adrm1 PE=1 SV=2 - [ADRM1_MOUSE]                        | 0               | 2 | 0 | 2 | 0 | 3 | 0 | 7 | N/A               | 2.192E-03 | 42.0     | ✓                         |                                               |      |           | ✓                                           | (9)(20)(23)                              |
| 217 | Q99K48    | NONO   | Non-POU domain-containing octamer-binding protein GN=Nono PE=1 SV=3 - [NONO_MOUSE]             | 0               | 2 | 0 | 2 | 0 | 3 | 0 | 7 | N/A               | 2.192E-03 | 54.5     | ✓                         |                                               | ✓    | ✓         | (9)(19)(23)(24)(26)                         |                                          |
| 218 | Q571G4    | LIN54  | Protein lin-54 homolog GN=Lin54 PE=2 SV=2 - [LIN54_MOUSE]                                      | 0               | 2 | 0 | 3 | 0 | 2 | 0 | 7 | N/A               | 2.192E-03 | 79.5     | ✓                         |                                               |      |           | (9)(19)(23)                                 |                                          |
| 219 | Q60710    | SAMH1  | SAM domain and HD domain-containing protein 1 GN=Samhd1 PE=1 SV=2 - [SAMH1_MOUSE]              | 0               | 3 | 0 | 2 | 0 | 2 | 0 | 7 | N/A               | 2.192E-03 | 72.6     | ✓                         |                                               | ✓    | ✓         | (23)                                        |                                          |
| 220 | Q9WU07    | CATZ   | Cathepsin Z GN=Ctzb PE=2 SV=1 - [CATZ_MOUSE]                                                   | 0               | 3 | 0 | 1 | 0 | 3 | 0 | 7 | N/A               | 2.490E-02 | 34.0     |                           | ✓                                             |      |           |                                             |                                          |
| 221 | P14719-2  | ILRL1  | Isoform B of Interleukin-1 receptor-like 1 GN=Il1rl1 - [ILRL1_MOUSE]                           | 0               | 3 | 0 | 2 | 0 | 2 | 0 | 7 | N/A               | 2.192E-03 | 38.5     |                           |                                               | ✓    |           | ✓                                           |                                          |
| 222 | P14428    | HA1Q   | H-2 class I histocompatibility antigen, K-Q alpha chain (Fragment) GN=H2-K1 PE=2 SV=1 - [H...] | 0               | 2 | 0 | 2 | 0 | 3 | 0 | 7 | N/A               | 2.192E-03 | 36.8     |                           |                                               | ✓    |           |                                             |                                          |
| 223 | Q9D032-2  | SSBP3  | Isoform 2 of Single-stranded DNA-binding protein 3 GN=Ssbp3 - [SSBP3_MOUSE]                    | 0               | 2 | 0 | 2 | 0 | 3 | 0 | 7 | N/A               | 2.192E-03 | 37.7     | ✓                         |                                               |      |           |                                             |                                          |
| 224 | Q7TSH6    | Q7TSH6 | Protein Scaf4 GN=Scaf4 PE=2 SV=1 - [Q7TSH6_MOUSE]                                              | 0               | 2 | 0 | 3 | 0 | 2 | 0 | 7 | N/A               | 2.192E-03 | 129      | ✓                         |                                               |      |           |                                             |                                          |
| 225 | Q62347    | Q62347 | Cyclic AMP-responsive element-binding protein 1 GN=Creb1 PE=2 SV=1 - [Q62347_MOUSE]            | 0               | 3 | 0 | 1 | 0 | 3 | 0 | 7 | N/A               | 2.490E-02 | 30.9     | ✓                         |                                               |      |           |                                             |                                          |
| 226 | E9Q7M2    | E9Q7M2 | Protein Tsc22d2 GN=Tsc22d2 PE=4 SV=1 - [E9Q7M2_MOUSE]                                          | 0               | 2 | 0 | 2 | 0 | 3 | 0 | 7 | N/A               | 2.192E-03 | 78.1     | ✓                         |                                               | ✓    |           |                                             |                                          |
| 227 | A3KGT0    | A3KGT0 | CUG triplet repeat, RNA binding protein 2 GN=Celf2 PE=4 SV=1 - [A3KGT0_MOUSE]                  | 0               | 3 | 0 | 2 | 0 | 2 | 0 | 7 | N/A               | 2.192E-03 | 16.4     | ✓                         |                                               |      |           |                                             |                                          |
| 228 | P28654    | PGS2   | Decorin GN=Dcn PE=2 SV=1 - [PGS2_MOUSE]                                                        | 0               | 2 | 0 | 1 | 0 | 3 | 0 | 6 | N/A               | 2.572E-02 | 39.8     |                           | ✓                                             |      |           |                                             | (17)                                     |
| 229 | P15307    | REL    | Proto-oncogene c-Rel GN=Rel PE=1 SV=2 - [REL_MOUSE]                                            | 0               | 1 | 0 | 3 | 0 | 2 | 0 | 6 | N/A               | 2.572E-02 | 64.9     | ✓                         |                                               | ✓    | ✓         | (9)(23)                                     |                                          |
| 230 | Q7TSJ2-3  | MAP6   | Isoform 3 of Microtubule-associated protein 6 GN=Map6 - [MAP6_MOUSE]                           | 0               | 3 | 0 | 1 | 0 | 2 | 0 | 6 | N/A               | 2.572E-02 | 32.8     | ✓                         |                                               | ✓    | ✓         | (5)                                         |                                          |
| 231 | Q5SXC4    | Q5SXC4 | Protein Vezf1 GN=Vezf1 PE=2 SV=1 - [Q5SXC4_MOUSE]                                              | 0               | 1 | 0 | 3 | 0 | 2 | 0 | 6 | N/A               | 2.572E-02 | 56.5     | ✓                         |                                               |      |           | (20)                                        |                                          |
| 232 | P25425-10 | PO2F1  | Isoform 10 of POU domain, class 2, transcription factor 1 GN=Pou2f1 - [PO2F1_MOUSE]            | 0               | 2 | 0 | 2 | 0 | 2 | 0 | 6 | N/A               | 0.000E+00 | 56.2     | ✓                         |                                               |      |           | (19)(23)                                    |                                          |
| 233 | A2AUK7    | A2AUK7 | Erythrocyte protein band 4.1-like 1 GN=Epb4.111 PE=4 SV=1 - [A2AUK7_MOUSE]                     | 0               | 1 | 0 | 2 | 0 | 3 | 0 | 6 | N/A               | 2.572E-02 | 81.8     | ✓                         |                                               |      |           | (13)                                        |                                          |
| 234 | Q9R017    | YLPM1  | YLP motif-containing protein 1 GN=Ylpm1 PE=2 SV=2 - [YLPM1_MOUSE]                              | 0               | 1 | 0 | 3 | 0 | 2 | 0 | 6 | N/A               | 2.572E-02 | 155      | ✓                         |                                               |      |           | (1)(9)(19)(23)                              |                                          |
| 235 | P58871    | TB182  | 182 kDa tankyrase-1-binding protein GN=Tnks1bp1 PE=1 SV=2 - [TB182_MOUSE]                      | 0               | 2 | 0 | 3 | 0 | 1 | 0 | 6 | N/A               | 2.572E-02 | 182      | ✓                         |                                               | ✓    | ✓         | (1)(20)(23)(26)                             |                                          |
| 236 | Q80WC7    | AGFG2  | Arf-GAP domain and FG repeat-containing protein 2 GN=Agfg2 PE=1 SV=1 - [AGFG2_MOUSE]           | 0               | 1 | 0 | 2 | 0 | 3 | 0 | 6 | N/A               | 2.572E-02 | 48.9     | ✓                         |                                               |      |           | (1)(20)                                     |                                          |
| 237 | Q689Z5    | SBNO1  | Protein strawberry notch homolog 1 GN=Sbno1 PE=1 SV=2 - [SBNO1_MOUSE]                          | 0               | 1 | 0 | 2 | 0 | 3 | 0 | 6 | N/A               | 2.572E-02 | 154      | ✓                         |                                               |      |           | (1)(20)                                     |                                          |
| 238 | POC7T6    | ATX1L  | Ataxin-1-like GN=Atxn1 PE=1 SV=1 - [ATX1L_MOUSE]                                               | 0               | 2 | 0 | 1 | 0 | 3 | 0 | 6 | N/A               | 2.572E-02 | 73.3     | ✓                         |                                               |      | ✓         | (1)                                         |                                          |
| 239 | O88668    | CREG1  | Protein CREG1 GN=Creg1 PE=2 SV=1 - [CREG1_MOUSE]                                               | 0               | 2 | 0 | 2 | 0 | 2 | 0 | 6 | N/A               | 0.000E+00 | 24.4     |                           | ✓                                             |      |           |                                             |                                          |
| 240 | B1B0C7    | B1B0C7 | Basement membrane-specific heparan sulfate proteoglycan core protein GN=Hspg2 PE=4 SV=4        | 0               | 1 | 0 | 2 | 0 | 3 | 0 | 6 | N/A               | 2.572E-02 | 469      |                           | ✓                                             |      |           |                                             |                                          |
| 241 | P53986    | MOT1   | Monocarboxylate transporter 1 GN=Slc16a1 PE=1 SV=1 - [MOT1_MOUSE]                              | 0               | 2 | 0 | 2 | 0 | 2 | 0 | 6 | N/A               | 0.000E+00 | 53.2     |                           |                                               | ✓    |           |                                             |                                          |
| 242 | Q920E5    | FPPS   | Farnesyl pyrophosphate synthase GN=Fdps PE=2 SV=1 - [FPPS_MOUSE]                               | 0               | 2 | 0 | 2 | 0 | 2 | 0 | 6 | N/A               | 0.000E+00 | 40.6     | ✓                         |                                               |      |           |                                             |                                          |

| GalNAz          |           |        |                                                                                         |             |   |   |     |                           |                                               |      |           |                   |           |          |              |  |   |   |         |                                             |                                          |                    |
|-----------------|-----------|--------|-----------------------------------------------------------------------------------------|-------------|---|---|-----|---------------------------|-----------------------------------------------|------|-----------|-------------------|-----------|----------|--------------|--|---|---|---------|---------------------------------------------|------------------------------------------|--------------------|
| Spectral Counts |           |        |                                                                                         |             |   |   |     |                           |                                               |      |           |                   |           |          |              |  |   |   |         |                                             |                                          |                    |
| No.             | Accession | Gene   | Description                                                                             | Ex-periment |   |   |     |                           |                                               |      |           | En-richment Ratio | t-test    | MW [kDa] | Localization |  |   |   |         | Previous O-GlcNAc Proteomics Identification | Previous Mucin Proteomics Identification |                    |
|                 |           |        |                                                                                         | 1           | 2 | 3 | Sum | Exclusively Intracellular | Exclusively Extracellular, Lysosomal, Luminal | Both | 6AzGlcNAc |                   |           |          | GlcNAz       |  |   |   |         |                                             |                                          |                    |
| 24              | Q08775-3  | RUNX2  | Isoform 3 of Runt-related transcription factor 2 GN=Runx2 - [RUNX2_MOUSE]               | 0           | 1 | 0 | 3   | 0                         | 2                                             | 0    | 6         | N/A               | 2.572E-02 | 55.7     | ✓            |  |   |   |         |                                             |                                          |                    |
| 24              | O88811-2  | STAM2  | Isoform 2 of Signal transducing adapter molecule 2 GN=Stam2 - [STAM2_MOUSE]             | 0           | 2 | 0 | 2   | 0                         | 2                                             | 0    | 6         | N/A               | 0.000E+00 | 46.2     | ✓            |  |   |   |         |                                             |                                          |                    |
| 24              | H3BLR8    | H3BLR8 | Diphosphoinositol polyphosphate phosphohydrolase 1 GN=Nudt3 PE=3 SV=1 - [H3BLR8_MOUSE]  | 0           | 2 | 0 | 2   | 0                         | 2                                             | 0    | 6         | N/A               | 0.000E+00 | 13.6     | ✓            |  |   |   |         |                                             |                                          |                    |
| 24              | F6VCW7    | F6VCW7 | Nuclear factor of-activated T-cells 5 (Fragment) GN=Nfat5 PE=4 SV=1 - [F6VCW7_MOUSE]    | 0           | 2 | 0 | 2   | 0                         | 2                                             | 0    | 6         | N/A               | 0.000E+00 | 14.7     | ✓            |  |   |   |         |                                             |                                          |                    |
| 24              | E9QME5    | E9QME5 | E3 ubiquitin-protein ligase TRIM33 GN=Trim33 PE=4 SV=1 - [E9QME5_MOUSE]                 | 0           | 2 | 0 | 1   | 0                         | 3                                             | 0    | 6         | N/A               | 2.572E-02 | 122      | ✓            |  |   |   |         |                                             |                                          |                    |
| 24              | H9H9R4    | H9H9R4 | Protein O610031J06Rik GN=O610031J06Rik PE=4 SV=1 - [H9H9R4_MOUSE]                       | 0           | 1 | 0 | 2   | 0                         | 3                                             | 0    | 6         | N/A               | 2.572E-02 | 36.7     |              |  |   |   |         |                                             |                                          |                    |
| 24              | Q8BKC5    | IPO5   | Importin-5 GN=Ipo5 PE=1 SV=3 - [IPO5_MOUSE]                                             | 0           | 2 | 0 | 2   | 0                         | 1                                             | 0    | 5         | N/A               | 7.490E-03 | 124      | ✓            |  | ✓ |   | (9)(23) |                                             | (17)                                     |                    |
| 25              | P97300-1  | NPTN   | Isoform 1 of Neuroplastin GN=Nptn - [NPTN_MOUSE]                                        | 0           | 1 | 0 | 2   | 0                         | 2                                             | 0    | 5         | N/A               | 7.490E-03 | 31.3     |              |  | ✓ |   |         |                                             |                                          | (17)               |
| 25              | Q91XA2    | GOLM1  | Golgi membrane protein 1 GN=Golm1 PE=1 SV=2 - [GOLM1_MOUSE]                             | 0           | 1 | 0 | 2   | 0                         | 2                                             | 0    | 5         | N/A               | 7.490E-03 | 44.3     |              |  | ✓ |   |         |                                             |                                          | (16)               |
| 25              | O35375-5  | NRP2   | Isoform B0 of Neuropilin-2 GN=Nrp2 - [NRP2_MOUSE]                                       | 0           | 1 | 0 | 2   | 0                         | 2                                             | 0    | 5         | N/A               | 7.490E-03 | 101      |              |  | ✓ |   |         |                                             |                                          | (16)               |
| 25              | B2RXS4    | PLXB2  | Plexin-B2 GN=Plxb2 PE=1 SV=1 - [PLXB2_MOUSE]                                            | 0           | 2 | 0 | 1   | 0                         | 2                                             | 0    | 5         | N/A               | 7.490E-03 | 206      |              |  | ✓ |   |         |                                             |                                          | (10)               |
| 25              | Q9VWH4    | FOXO3  | Forkhead box protein O3 GN=Foxo3 PE=1 SV=1 - [FOXO3_MOUSE]                              | 0           | 2 | 0 | 1   | 0                         | 2                                             | 0    | 5         | N/A               | 7.490E-03 | 71.0     | ✓            |  |   |   |         |                                             |                                          | (9)(23)            |
| 25              | Q9WU00-2  | NRF1   | Isoform Short of Nuclear respiratory factor 1 GN=Nrf1 - [NRF1_MOUSE]                    | 0           | 2 | 0 | 1   | 0                         | 2                                             | 0    | 5         | N/A               | 7.490E-03 | 46.1     | ✓            |  |   |   |         |                                             |                                          | (9)(23)            |
| 25              | Q60793    | KLF4   | Kruppel-like factor 4 GN=Klf4 PE=1 SV=3 - [KLF4_MOUSE]                                  | 0           | 2 | 0 | 1   | 0                         | 2                                             | 0    | 5         | N/A               | 7.490E-03 | 51.8     | ✓            |  |   |   |         |                                             |                                          | (9)(23)            |
| 25              | Q9Z1D1    | EIF3G  | Eukaryotic translation initiation factor 3 subunit G GN=EIF3g PE=1 SV=2 - [EIF3G_MOUSE] | 0           | 2 | 0 | 2   | 0                         | 1                                             | 0    | 5         | N/A               | 7.490E-03 | 35.6     | ✓            |  | ✓ |   |         |                                             |                                          | (9)(19)(23)(26)    |
| 25              | Q62261-2  | SPTB2  | Isoform 2 of Spectrin beta chain, non-erythrocytic 1 GN=Sptbn1 - [SPTB2_MOUSE]          | 0           | 2 | 0 | 1   | 0                         | 2                                             | 0    | 5         | N/A               | 7.490E-03 | 251      | ✓            |  |   |   |         |                                             |                                          | (5)(21)            |
| 25              | Q8VCQ8    | Q8VCQ8 | Caldesmon 1 GN=Cald1 PE=2 SV=1 - [Q8VCQ8_MOUSE]                                         | 0           | 2 | 0 | 1   | 0                         | 2                                             | 0    | 5         | N/A               | 7.490E-03 | 60.4     | ✓            |  | ✓ | ✓ |         |                                             |                                          | (26)               |
| 26              | P97765    | WBP2   | WW domain-binding protein 2 GN=Wbp2 PE=1 SV=1 - [WBP2_MOUSE]                            | 0           | 2 | 0 | 2   | 0                         | 1                                             | 0    | 5         | N/A               | 7.490E-03 | 28.0     | ✓            |  |   |   |         |                                             |                                          | (20)               |
| 26              | G5E899    | G5E899 | Plasminogen activator inhibitor 1 GN=Serpine1 PE=3 SV=1 - [G5E899_MOUSE]                | 0           | 2 | 0 | 2   | 0                         | 1                                             | 0    | 5         | N/A               | 7.490E-03 | 45.0     |              |  | ✓ |   |         |                                             |                                          |                    |
| 26              | Q8BX21    | TMX3   | Protein disulfide-isomerase TMX3 GN=Tmx3 PE=1 SV=2 - [TMX3_MOUSE]                       | 0           | 2 | 0 | 1   | 0                         | 2                                             | 0    | 5         | N/A               | 7.490E-03 | 51.8     |              |  | ✓ |   |         |                                             |                                          |                    |
| 26              | Q6PD26    | PIGS   | GPI transamidase component PIG-S GN=Pigs PE=1 SV=3 - [PIGS_MOUSE]                       | 0           | 2 | 0 | 2   | 0                         | 1                                             | 0    | 5         | N/A               | 7.490E-03 | 61.7     |              |  | ✓ |   |         |                                             |                                          |                    |
| 26              | P09450    | JUNB   | Transcription factor jun-B GN=Junb PE=1 SV=1 - [JUNB_MOUSE]                             | 0           | 2 | 0 | 2   | 0                         | 1                                             | 0    | 5         | N/A               | 7.490E-03 | 35.7     | ✓            |  |   |   |         |                                             |                                          |                    |
| 26              | O89032-3  | SPD2A  | Isoform 3 of SH3 and PX domain-containing protein 2A GN=Sh3pxd2a - [SPD2A_MOUSE]        | 0           | 1 | 0 | 2   | 0                         | 2                                             | 0    | 5         | N/A               | 7.490E-03 | 119      | ✓            |  | ✓ |   |         |                                             |                                          |                    |
| 26              | H3BJ97    | H3BJ97 | Tubulointerstitial nephritis antigen-like GN=Tinagl1 PE=3 SV=1 - [H3BJ97_MOUSE]         | 0           | 1 | 0 | 2   | 0                         | 2                                             | 0    | 5         | N/A               | 7.490E-03 | 49.2     | ✓            |  |   |   |         |                                             |                                          |                    |
| 26              | E9QLT6    | E9QLT6 | Aryl hydrocarbon receptor nuclear translocator GN=Arnt PE=4 SV=2 - [E9QLT6_MOUSE]       | 0           | 2 | 0 | 2   | 0                         | 1                                             | 0    | 5         | N/A               | 7.490E-03 | 84.5     | ✓            |  |   |   |         |                                             |                                          |                    |
| 26              | A2A9W7    | A2A9W7 | ADP-ribosylation factor-binding protein GGA3 GN=Gga3 PE=4 SV=1 - [A2A9W7_MOUSE]         | 0           | 2 | 0 | 2   | 0                         | 1                                             | 0    | 5         | N/A               | 7.490E-03 | 70.1     | ✓            |  |   |   |         |                                             |                                          |                    |
| 26              | O88531    | PPT1   | Palmitoyl-protein thioesterase 1 GN=Ppt1 PE=2 SV=2 - [PPT1_MOUSE]                       | 0           | 1 | 0 | 2   | 0                         | 1                                             | 0    | 4         | N/A               | 1.613E-02 | 34.5     |              |  | ✓ |   |         |                                             |                                          | (17)               |
| 27              | Q8BJS4-3  | SUN2   | Isoform 3 of SUN domain-containing protein 2 GN=Sun2 - [SUN2_MOUSE]                     | 0           | 1 | 0 | 2   | 0                         | 1                                             | 0    | 4         | N/A               | 1.613E-02 | 78.1     | ✓            |  |   |   |         |                                             |                                          | (16)               |
| 27              | P43406    | ITAV   | Integrin alpha-V GN=Itgav PE=1 SV=2 - [ITAV_MOUSE]                                      | 0           | 1 | 0 | 2   | 0                         | 1                                             | 0    | 4         | N/A               | 1.613E-02 | 115      | ✓            |  | ✓ |   |         |                                             |                                          | (10)               |
| 27              | Q9WTK5    | NFKB2  | Nuclear factor NF-kappa-B p100 subunit GN=Nfkb2 PE=1 SV=1 - [NFKB2_MOUSE]               | 0           | 1 | 0 | 1   | 0                         | 2                                             | 0    | 4         | N/A               | 1.613E-02 | 96.8     | ✓            |  | ✓ | ✓ |         |                                             |                                          | (9)(23)(26)        |
| 27              | Q9DBR0    | AKAP8  | A-kinase anchor protein 8 GN=Akap8 PE=1 SV=1 - [AKAP8_MOUSE]                            | 0           | 1 | 0 | 2   | 0                         | 1                                             | 0    | 4         | N/A               | 1.613E-02 | 76.2     | ✓            |  | ✓ |   |         |                                             |                                          | (9)(23)            |
| 27              | P60229    | EIF3E  | Eukaryotic translation initiation factor 3 subunit E GN=EIF3e PE=1 SV=1 - [EIF3E_MOUSE] | 0           | 1 | 0 | 1   | 0                         | 2                                             | 0    | 4         | N/A               | 1.613E-02 | 52.2     | ✓            |  |   |   |         |                                             |                                          | (9)(23)            |
| 27              | B2RRE7    | OTUD4  | OTU domain-containing protein 4 GN=Otud4 PE=1 SV=1 - [OTUD4_MOUSE]                      | 0           | 2 | 0 | 1   | 0                         | 1                                             | 0    | 4         | N/A               | 1.613E-02 | 123      | ✓            |  | ✓ |   |         |                                             |                                          | (9)(23)            |
| 27              | P54254    | ATX1   | Ataxin-1 GN=Atxn1 PE=1 SV=2 - [ATX1_MOUSE]                                              | 0           | 1 | 0 | 1   | 0                         | 2                                             | 0    | 4         | N/A               | 1.613E-02 | 83.7     | ✓            |  |   |   |         |                                             |                                          | (20)               |
| 27              | B1AR09    | B1AR09 | Myeloid/lymphoid or mixed lineage-leukemia translocation to 6 homolog (Drosophila) GN=N | 0           | 1 | 0 | 2   | 0                         | 1                                             | 0    | 4         | N/A               | 1.613E-02 | 111      | ✓            |  |   |   |         |                                             |                                          | (20)               |
| 27              | Q9CZD3    | SYG    | Glycine--tRNA ligase GN=Gars PE=1 SV=1 - [SYG_MOUSE]                                    | 0           | 2 | 0 | 1   | 0                         | 1                                             | 0    | 4         | N/A               | 1.613E-02 | 81.8     | ✓            |  | ✓ |   |         |                                             |                                          | (14)(23)(26)       |
| 27              | Q8VI36-2  | PAXI   | Isoform Alpha of Paxillin GN=Pxn - [PAXI_MOUSE]                                         | 0           | 1 | 0 | 2   | 0                         | 1                                             | 0    | 4         | N/A               | 1.613E-02 | 60.8     | ✓            |  |   | ✓ |         |                                             |                                          | (14)(23)           |
| 28              | Q8C9B9    | DIDO1  | Death-inducer obliterator 1 GN=Dido1 PE=1 SV=4 - [DIDO1_MOUSE]                          | 0           | 2 | 0 | 1   | 0                         | 1                                             | 0    | 4         | N/A               | 1.613E-02 | 247      | ✓            |  |   |   |         |                                             |                                          | (1)(9)(19)(20)(23) |
| 28              | Q3UHC0    | TNR6C  | Trinucleotide repeat-containing gene 6C protein GN=Tnrc6c PE=1 SV=2 - [TNR6C_MOUSE]     | 0           | 1 | 0 | 2   | 0                         | 1                                             | 0    | 4         | N/A               | 1.613E-02 | 176      | ✓            |  |   |   |         |                                             |                                          | (1)(20)(23)        |
| 28              | Q9R233-2  | TPSN   | Isoform Short of Tapasin GN=Tapbp - [TPSN_MOUSE]                                        | 0           | 1 | 0 | 2   | 0                         | 1                                             | 0    | 4         | N/A               | 1.613E-02 | 46.6     |              |  | ✓ |   |         |                                             |                                          |                    |
| 28              | P50429-2  | ARSB   | Isoform 2 of Arylsulfatase B GN=Arsb - [ARSB_MOUSE]                                     | 0           | 1 | 0 | 2   | 0                         | 1                                             | 0    | 4         | N/A               | 1.613E-02 | 47.9     |              |  | ✓ |   |         |                                             |                                          |                    |
| 28              | O09159    | MA2B1  | Lysosomal alpha-mannosidase GN=Man2b1 PE=2 SV=4 - [MA2B1_MOUSE]                         | 0           | 1 | 0 | 2   | 0                         | 1                                             | 0    | 4         | N/A               | 1.613E-02 | 115      |              |  | ✓ |   |         |                                             |                                          |                    |

| GalNaz                 |                        |                        |     |
|------------------------|------------------------|------------------------|-----|
| Spectral Counts        |                        |                        |     |
| Ex-<br>peri-<br>ment 1 | Ex-<br>peri-<br>ment 2 | Ex-<br>peri-<br>ment 3 | Sum |

| No. | Accession | Gene   | Description                                                                                              | Spectral Counts |    |   |    |   |    |   |     | En-<br>rich-<br>ment<br>Ratio | t-test    | MW<br>[kDa] | Localization                 |                                                        |      |               | Previous O-<br>GlcNAc<br>Proteomics<br>Identification | Previous<br>Mucin Pro-<br>teomics<br>Identification |                 |             |
|-----|-----------|--------|----------------------------------------------------------------------------------------------------------|-----------------|----|---|----|---|----|---|-----|-------------------------------|-----------|-------------|------------------------------|--------------------------------------------------------|------|---------------|-------------------------------------------------------|-----------------------------------------------------|-----------------|-------------|
|     |           |        |                                                                                                          | -               | +  | - | +  | - | +  | - | +   |                               |           |             | Exclusively<br>Intracellular | Exclusively<br>Extracellular,<br>Lysosomal,<br>Luminal | Both | 6AzGl<br>cNAc |                                                       |                                                     | GlcNA<br>z      |             |
| 28f | E9Q0W5    | E9Q0W5 | Protein FAM3C (Fragment) GN=Fam3c PE=4 SV=1 - [E9Q0W5_MOUSE]                                             | 0               | 1  | 0 | 2  | 0 | 1  | 0 | 4   | N/A                           | 1.613E-02 | 16.5        |                              | ✓                                                      |      |               |                                                       |                                                     |                 |             |
| 28f | Q6NZD2    | Q6NZD2 | Sorting nexin 1 GN=Snx1 PE=2 SV=1 - [Q6NZD2_MOUSE]                                                       | 0               | 1  | 0 | 2  | 0 | 1  | 0 | 4   | N/A                           | 1.613E-02 | 58.8        | ✓                            |                                                        |      | ✓             | ✓                                                     |                                                     |                 |             |
| 28f | P97496-2  | SMRC1  | Isoform 2 of SWI/SNF complex subunit SMARCC1 GN=Smarcc1 - [SMRC1_MOUSE]                                  | 0               | 1  | 0 | 2  | 0 | 1  | 0 | 4   | N/A                           | 1.613E-02 | 120         | ✓                            |                                                        |      |               |                                                       |                                                     |                 |             |
| 28f | G5E8E1    | G5E8E1 | Leucine rich repeat (In FLII) interacting protein 1, isoform CRA_e GN=Lrrfip1 PE=4 SV=1 - [G5E8E1_MOUSE] | 0               | 1  | 0 | 1  | 0 | 2  | 0 | 4   | N/A                           | 1.613E-02 | 48.9        | ✓                            |                                                        |      | ✓             | ✓                                                     |                                                     |                 |             |
| 28f | F6VXN4    | F6VXN4 | TSC22 domain family protein 4 (Fragment) GN=Tsc22d4 PE=4 SV=1 - [F6VXN4_MOUSE]                           | 0               | 2  | 0 | 1  | 0 | 1  | 0 | 4   | N/A                           | 1.613E-02 | 10.3        | ✓                            |                                                        |      |               |                                                       |                                                     |                 |             |
| 29f | E9Q6M7    | E9Q6M7 | Pumilio homolog 1 GN=Pum1 PE=4 SV=1 - [E9Q6M7_MOUSE]                                                     | 0               | 2  | 0 | 1  | 0 | 1  | 0 | 4   | N/A                           | 1.613E-02 | 100         | ✓                            |                                                        |      |               |                                                       |                                                     |                 |             |
| 29f | D3YY34    | D3YY34 | Polyhomeotic-like protein 3 GN=Phc3 PE=4 SV=1 - [D3YY34_MOUSE]                                           | 0               | 1  | 0 | 2  | 0 | 1  | 0 | 4   | N/A                           | 1.613E-02 | 102         | ✓                            |                                                        |      |               |                                                       |                                                     |                 |             |
| 29f | D3YXK2    | SAFB1  | Scaffold attachment factor B1 GN=Saflb PE=1 SV=2 - [SAFB1_MOUSE]                                         | 0               | 1  | 0 | 2  | 0 | 1  | 0 | 4   | N/A                           | 1.613E-02 | 105         | ✓                            |                                                        |      | ✓             | ✓                                                     |                                                     |                 |             |
| 29f | Q9EP69    | SAC1   | Phosphatidylinositol phosphatase SAC1 GN=Sacm11 PE=2 SV=1 - [SAC1_MOUSE]                                 | 0               | 2  | 0 | 1  | 0 | 1  | 0 | 4   | N/A                           | 1.613E-02 | 66.9        |                              |                                                        |      |               |                                                       |                                                     |                 |             |
| 29f | P97298    | PEDF   | Pigment epithelium-derived factor GN=Serpinf1 PE=1 SV=2 - [PEDF_MOUSE]                                   | 0               | 1  | 0 | 1  | 0 | 1  | 0 | 3   | N/A                           | 0.000E+00 | 46.2        |                              | ✓                                                      |      |               |                                                       |                                                     |                 | (17)        |
| 29f | Q8BPB5    | FBLN3  | EGF-containing fibulin-like extracellular matrix protein 1 GN=Efemp1 PE=2 SV=1 - [FBLN3_MOUSE]           | 0               | 1  | 0 | 1  | 0 | 1  | 0 | 3   | N/A                           | 0.000E+00 | 54.9        |                              | ✓                                                      |      |               | ✓                                                     |                                                     |                 | (16)        |
| 29f | A8Y5F6    | A8Y5F6 | Podoplanin GN=Pdpn PE=1 SV=1 - [A8Y5F6_MOUSE]                                                            | 0               | 1  | 0 | 1  | 0 | 1  | 0 | 3   | N/A                           | 0.000E+00 | 16.8        |                              | ✓                                                      |      |               |                                                       | (26)                                                |                 | (11)        |
| 29f | Q62418-3  | DBNL   | Isoform 3 of Drebrin-like protein GN=Dbnl - [DBNL_MOUSE]                                                 | 0               | 1  | 0 | 1  | 0 | 1  | 0 | 3   | N/A                           | 0.000E+00 | 48.3        | ✓                            |                                                        |      | ✓             | ✓                                                     |                                                     | (9)(23)(26)     |             |
| 29f | Q8C0C0    | ZHX2   | Zinc fingers and homeoboxes protein 2 GN=Zhx2 PE=1 SV=1 - [ZHX2_MOUSE]                                   | 0               | 1  | 0 | 1  | 0 | 1  | 0 | 3   | N/A                           | 0.000E+00 | 92.2        | ✓                            |                                                        |      |               |                                                       |                                                     | (9)(23)         |             |
| 29f | Q6P5G6    | UBXN7  | UBX domain-containing protein 7 GN=Ubxn7 PE=1 SV=2 - [UBXN7_MOUSE]                                       | 0               | 1  | 0 | 1  | 0 | 1  | 0 | 3   | N/A                           | 0.000E+00 | 52.1        | ✓                            |                                                        |      |               | ✓                                                     |                                                     | (9)(23)         |             |
| 30f | P45377    | ALD2   | Aldose reductase-related protein 2 GN=Akr1b8 PE=1 SV=2 - [ALD2_MOUSE]                                    | 0               | 1  | 0 | 1  | 0 | 1  | 0 | 3   | N/A                           | 0.000E+00 | 36.1        |                              |                                                        |      | ✓             | ✓                                                     |                                                     | (26)            |             |
| 30f | Q9JIF7    | COPB   | Coatomer subunit beta GN=Copb1 PE=1 SV=1 - [COPB_MOUSE]                                                  | 0               | 1  | 0 | 1  | 0 | 1  | 0 | 3   | N/A                           | 0.000E+00 | 107         | ✓                            |                                                        |      |               | ✓                                                     |                                                     | (14)(23)        |             |
| 30f | Q9ESU7    | Q9ESU7 | Neutral amino acid transporter ASCT2 GN=Slc1a5 PE=2 SV=1 - [Q9ESU7_MOUSE]                                | 0               | 1  | 0 | 1  | 0 | 1  | 0 | 3   | N/A                           | 0.000E+00 | 58.4        |                              |                                                        | ✓    |               |                                                       |                                                     |                 |             |
| 30f | Q01721    | GAS1   | Growth arrest-specific protein 1 GN=Gas1 PE=2 SV=2 - [GAS1_MOUSE]                                        | 0               | 1  | 0 | 1  | 0 | 1  | 0 | 3   | N/A                           | 0.000E+00 | 35.7        |                              |                                                        | ✓    |               |                                                       |                                                     |                 |             |
| 30f | P28653    | PGS1   | Biglycan GN=Bgn PE=2 SV=1 - [PGS1_MOUSE]                                                                 | 0               | 1  | 0 | 1  | 0 | 1  | 0 | 3   | N/A                           | 0.000E+00 | 41.6        |                              |                                                        | ✓    |               |                                                       |                                                     |                 |             |
| 30f | P23780    | BGAL   | Beta-galactosidase GN=Glb1 PE=2 SV=1 - [BGAL_MOUSE]                                                      | 0               | 1  | 0 | 1  | 0 | 1  | 0 | 3   | N/A                           | 0.000E+00 | 73.1        |                              |                                                        | ✓    |               |                                                       |                                                     |                 |             |
| 30f | G3UWE1    | G3UWE1 | MCG11048, isoform CRA_c GN=Teer PE=4 SV=1 - [G3UWE1_MOUSE]                                               | 0               | 1  | 0 | 1  | 0 | 1  | 0 | 3   | N/A                           | 0.000E+00 | 34.2        |                              |                                                        | ✓    |               |                                                       |                                                     |                 |             |
| 30f | B7ZC19    | B7ZC19 | GPI transamidase component PIG-T GN=Pigt PE=4 SV=1 - [B7ZC19_MOUSE]                                      | 0               | 1  | 0 | 1  | 0 | 1  | 0 | 3   | N/A                           | 0.000E+00 | 49.1        |                              |                                                        | ✓    |               |                                                       |                                                     |                 |             |
| 30f | Q9JLJ5    | ELOV1  | Elongation of very long chain fatty acids protein 1 GN=Elov1 PE=2 SV=1 - [ELOV1_MOUSE]                   | 0               | 1  | 0 | 1  | 0 | 1  | 0 | 3   | N/A                           | 0.000E+00 | 32.7        |                              |                                                        |      | ✓             | ✓                                                     | ✓                                                   |                 |             |
| 30f | Q9Z1B5    | MD2L1  | Mitotic spindle assembly checkpoint protein MAD2A GN=Mad2l1 PE=2 SV=2 - [MD2L1_MOUSE]                    | 0               | 1  | 0 | 1  | 0 | 1  | 0 | 3   | N/A                           | 0.000E+00 | 23.6        | ✓                            |                                                        |      |               |                                                       |                                                     |                 | ✓           |
| 31f | Q9QYH6    | MAGD1  | Melanoma-associated antigen D1 GN=Maged1 PE=1 SV=1 - [MAGD1_MOUSE]                                       | 0               | 1  | 0 | 1  | 0 | 1  | 0 | 3   | N/A                           | 0.000E+00 | 85.6        | ✓                            |                                                        |      |               |                                                       |                                                     |                 |             |
| 31f | Q9DBY0-2  | FOXP4  | Isoform 2 of Forkhead box protein P4 GN=Foxp4 - [FOXP4_MOUSE]                                            | 0               | 1  | 0 | 1  | 0 | 1  | 0 | 3   | N/A                           | 0.000E+00 | 72.7        | ✓                            |                                                        |      |               |                                                       |                                                     |                 |             |
| 31f | Q8BKL1    | Q8BKL1 | Protein SSXT GN=Ss18 PE=2 SV=1 - [Q8BKL1_MOUSE]                                                          | 0               | 1  | 0 | 1  | 0 | 1  | 0 | 3   | N/A                           | 0.000E+00 | 38.0        | ✓                            |                                                        |      |               |                                                       |                                                     |                 |             |
| 31f | Q8BH93    | MISSL  | MAPK-interacting and spindle-stabilizing protein-like GN=Mapk1ip11 PE=2 SV=3 - [MISSL_MOUSE]             | 0               | 1  | 0 | 1  | 0 | 1  | 0 | 3   | N/A                           | 0.000E+00 | 23.9        | ✓                            |                                                        |      |               |                                                       |                                                     |                 | ✓           |
| 31f | Q61286-2  | HTF4   | Isoform ALF1A of Transcription factor 12 GN=Tcf12 - [HTF4_MOUSE]                                         | 0               | 1  | 0 | 1  | 0 | 1  | 0 | 3   | N/A                           | 0.000E+00 | 72.9        | ✓                            |                                                        |      |               |                                                       |                                                     |                 |             |
| 31f | P70445    | 4EBP2  | Eukaryotic translation initiation factor 4E-binding protein 2 GN=Eif4ebp2 PE=2 SV=1 - [4EBP2_MOUSE]      | 0               | 1  | 0 | 1  | 0 | 1  | 0 | 3   | N/A                           | 0.000E+00 | 12.9        | ✓                            |                                                        |      |               | ✓                                                     |                                                     |                 |             |
| 31f | F6T2Z7    | F6T2Z7 | Protein Cald1 (Fragment) GN=Cald1 PE=4 SV=1 - [F6T2Z7_MOUSE]                                             | 0               | 1  | 0 | 1  | 0 | 1  | 0 | 3   | N/A                           | 0.000E+00 | 41.4        | ✓                            |                                                        |      |               | ✓                                                     | ✓                                                   |                 |             |
| 31f | D3Z0J5    | D3Z0J5 | Forkhead box protein P1 (Fragment) GN=Foxp1 PE=4 SV=1 - [D3Z0J5_MOUSE]                                   | 0               | 1  | 0 | 1  | 0 | 1  | 0 | 3   | N/A                           | 0.000E+00 | 38.8        | ✓                            |                                                        |      |               |                                                       |                                                     |                 |             |
| 31f | P08207    | S10AA  | Protein S100-A10 GN=S100a10 PE=2 SV=2 - [S10AA_MOUSE]                                                    | 0               | 1  | 0 | 1  | 0 | 1  | 0 | 3   | N/A                           | 0.000E+00 | 11.2        |                              |                                                        |      |               |                                                       |                                                     |                 | ✓           |
| 31f | J3QNT2    | J3QNT2 | Uncharacterized protein GN=Gm5435 PE=4 SV=1 - [J3QNT2_MOUSE]                                             | 0               | 1  | 0 | 1  | 0 | 1  | 0 | 3   | N/A                           | 0.000E+00 | 41.1        |                              |                                                        |      |               |                                                       |                                                     |                 |             |
| 32f | P11276    | FINC   | Fibronectin GN=Fn1 PE=1 SV=4 - [FINC_MOUSE]                                                              | 1               | 48 | 1 | 65 | 0 | 57 | 2 | 170 | 85.00                         | 3.402E-04 | 272         |                              |                                                        | ✓    |               |                                                       |                                                     |                 | (16)(17)    |
| 32f | E9PVC5    | E9PVC5 | Eukaryotic translation initiation factor 4 gamma 1 GN=Eif4g1 PE=4 SV=1 - [E9PVC5_MOUSE]                  | 0               | 20 | 1 | 23 | 0 | 19 | 1 | 62  | 62.00                         | 8.285E-05 | 175         | ✓                            |                                                        |      | ✓             | ✓                                                     |                                                     | (12)            |             |
| 32f | Q8VHR5    | P66B   | Transcriptional repressor p66-beta GN=Gatad2b PE=1 SV=1 - [P66B_MOUSE]                                   | 0               | 12 | 1 | 15 | 0 | 18 | 1 | 45  | 45.00                         | 1.143E-03 | 65.4        | ✓                            |                                                        |      |               |                                                       | ✓                                                   |                 | (1)(20)(23) |
| 32f | Q8BFW7    | LPP    | Lipoma-preferred partner homolog GN=Lpp PE=1 SV=1 - [LPP_MOUSE]                                          | 0               | 11 | 1 | 17 | 0 | 16 | 1 | 44  | 44.00                         | 1.607E-03 | 65.8        | ✓                            |                                                        |      | ✓             | ✓                                                     |                                                     | (9)(20)(23)(26) | (16)        |
| 32f | Q60715    | P4HA1  | Prolyl 4-hydroxylase subunit alpha-1 GN=P4ha1 PE=2 SV=2 - [P4HA1_MOUSE]                                  | 0               | 5  | 1 | 8  | 0 | 10 | 1 | 23  | 23.00                         | 7.933E-03 | 60.9        |                              |                                                        | ✓    |               |                                                       |                                                     |                 | (16)        |
| 32f | P60335    | PCBP1  | Poly(RC)-binding protein 1 GN=Pcbp1 PE=1 SV=1 - [PCBP1_MOUSE]                                            | 0               | 8  | 1 | 9  | 0 | 6  | 1 | 23  | 23.00                         | 1.473E-03 | 37.5        | ✓                            |                                                        |      | ✓             | ✓                                                     |                                                     | (9)(14)(23)(26) |             |
| 32f | Q3UPL0-2  | SC31A  | Isoform 2 of Protein transport protein Sec31A GN=Sec31a - [SC31A_MOUSE]                                  | 1               | 15 | 2 | 19 | 0 | 20 | 3 | 54  | 18.00                         | 4.809E-04 | 130         | ✓                            |                                                        |      |               |                                                       | ✓                                                   |                 | (5)(19)(26) |
| 32f | O54931-2  | AKAP2  | Isoform 2 of A-kinase anchor protein 2 GN=Akap2 - [AKAP2_MOUSE]                                          | 0               | 6  | 1 | 6  | 0 | 4  | 1 | 16  | 16.00                         | 2.570E-03 | 97.1        | ✓                            |                                                        |      | ✓             | ✓                                                     |                                                     | (9)(23)(26)     |             |



|     |           | GalNAz          |                                                                                          |               |    |               |    |     |    |                   |           |          |              |      |                           |           |        |                                             |                                          |                                               |      |
|-----|-----------|-----------------|------------------------------------------------------------------------------------------|---------------|----|---------------|----|-----|----|-------------------|-----------|----------|--------------|------|---------------------------|-----------|--------|---------------------------------------------|------------------------------------------|-----------------------------------------------|------|
|     |           | Spectral Counts |                                                                                          |               |    |               |    |     |    |                   |           |          |              |      |                           |           |        |                                             |                                          |                                               |      |
|     |           | Ex-periment 1   |                                                                                          | Ex-periment 2 |    | Ex-periment 3 |    | Sum |    |                   |           |          |              |      |                           |           |        |                                             |                                          |                                               |      |
| No. | Accession | Gene            | Description                                                                              |               |    |               |    |     |    | En-richment Ratio | t-test    | MW [kDa] | Localization |      |                           | 6AzGlcNAc | GlcNAz | Previous O-GlcNAc Proteomics Identification | Previous Mucin Proteomics Identification |                                               |      |
|     |           |                 |                                                                                          | -             | +  | -             | +  | -   | +  |                   |           |          | -            | +    | Exclusively Intracellular |           |        |                                             |                                          | Exclusively Extracellular, Lysosomal, Luminal | Both |
| 32  | Q62523    | ZYX             | Zyxin GN=Zyx PE=1 SV=2 - [ZYX_MOUSE]                                                     | 0             | 11 | 2             | 9  | 0   | 11 | <b>2</b>          | <b>31</b> | 15.50    | 5.101E-04    | 60.5 | ✓                         |           |        | (1)(9)(23)(26)                              |                                          |                                               |      |
| 32  | Q61029-3  | LAP2B           | Isoform Epsilon of Lamina-associated polypeptide 2, isoforms beta/delta/epsilon/gamma GN | 1             | 9  | 1             | 10 | 0   | 11 | <b>2</b>          | <b>30</b> | 15.00    | 1.510E-04    | 46.0 | ✓                         | ✓         |        | (26)                                        |                                          |                                               |      |
| 33  | Q61033    | LAP2A           | Lamina-associated polypeptide 2, isoforms alpha/zeta GN=Tmpo PE=1 SV=4 - [LAP2A_MOL      | 1             | 5  | 0             | 5  | 0   | 5  | <b>1</b>          | <b>15</b> | 15.00    | 1.510E-04    | 75.1 | ✓                         | ✓         |        | (23)(26)                                    |                                          |                                               |      |
| 33  | Q8CI51    | PDLI5           | PDZ and LIM domain protein 5 GN=Pdlim5 PE=1 SV=4 - [PDLI5_MOUSE]                         | 0             | 11 | 2             | 10 | 0   | 8  | <b>2</b>          | <b>29</b> | 14.50    | 1.239E-03    | 63.3 | ✓                         |           |        | (1)(23)(26)                                 |                                          |                                               |      |
| 33  | P16092-6  | FGFR1           | Isoform 6 of Fibroblast growth factor receptor 1 GN=Fgfr1 - [FGFR1_MOUSE]                | 0             | 3  | 1             | 6  | 0   | 3  | <b>1</b>          | <b>12</b> | 12.00    | 2.539E-02    | 91.6 |                           | ✓         |        |                                             |                                          |                                               |      |
| 33  | Q6DFW4    | NOP58           | Nucleolar protein 58 GN=Nop58 PE=1 SV=1 - [NOP58_MOUSE]                                  | 1             | 2  | 0             | 5  | 0   | 4  | <b>1</b>          | <b>11</b> | 11.00    | 2.411E-02    | 60.3 | ✓                         |           |        | (9)(23)(26)                                 |                                          |                                               |      |
| 33  | P10605    | CATB            | Cathepsin B GN=Ctsb PE=1 SV=2 - [CATB_MOUSE]                                             | 1             | 11 | 1             | 12 | 2   | 14 | <b>4</b>          | <b>37</b> | 9.25     | 3.085E-04    | 37.3 |                           |           |        | (26)                                        | (17)                                     |                                               |      |
| 33  | Q501J6    | DDX17           | Probable ATP-dependent RNA helicase DDX17 GN=Ddx17 PE=2 SV=1 - [DDX17_MOUSE]             | 0             | 3  | 0             | 2  | 1   | 4  | <b>1</b>          | <b>9</b>  | 9.00     | 1.613E-02    | 72.4 | ✓                         |           |        | (5)(9)(23)(26)                              |                                          |                                               |      |
| 33  | Q61990    | PCBP2           | Poly(rC)-binding protein 2 GN=Pcbp2 PE=1 SV=1 - [PCBP2_MOUSE]                            | 0             | 2  | 1             | 4  | 0   | 2  | <b>1</b>          | <b>8</b>  | 8.00     | 3.517E-02    | 38.2 | ✓                         |           |        | (5)(14)(26)                                 | (17)                                     |                                               |      |
| 33  | P06797    | CATL1           | Cathepsin L1 GN=Ctsl1 PE=1 SV=2 - [CATL1_MOUSE]                                          | 1             | 4  | 1             | 6  | 0   | 4  | <b>2</b>          | <b>14</b> | 7.00     | 5.821E-03    | 37.5 |                           | ✓         |        |                                             | (17)                                     |                                               |      |
| 33  | P14733    | LMNB1           | Lamin-B1 GN=Lmbn1 PE=1 SV=3 - [LMNB1_MOUSE]                                              | 0             | 2  | 1             | 3  | 0   | 2  | <b>1</b>          | <b>7</b>  | 7.00     | 1.324E-02    | 66.7 | ✓                         |           |        | (9)(23)                                     |                                          |                                               |      |
| 33  | Q922Q8    | LRC59           | Leucine-rich repeat-containing protein 59 GN=Lrrc59 PE=2 SV=1 - [LRC59_MOUSE]            | 0             | 2  | 1             | 2  | 0   | 3  | <b>1</b>          | <b>7</b>  | 7.00     | 1.324E-02    | 34.9 |                           | ✓         |        |                                             |                                          |                                               |      |
| 34  | P06151    | LDHA            | L-lactate dehydrogenase A chain GN=Ldha PE=1 SV=3 - [LDHA_MOUSE]                         | 1             | 5  | 1             | 6  | 1   | 5  | <b>3</b>          | <b>16</b> | 5.33     | 2.020E-04    | 36.5 | ✓                         |           |        | (6)(9)(23)(24)(26)                          | (17)                                     |                                               |      |
| 34  | E9Q1P8    | I2BP2           | Interferon regulatory factor 2-binding protein 2 GN=Irf2bp2 PE=1 SV=1 - [I2BP2_MOUSE]    | 1             | 1  | 0             | 2  | 0   | 2  | <b>1</b>          | <b>5</b>  | 5.00     | 4.742E-02    | 59.3 | ✓                         |           |        | (23)                                        |                                          |                                               |      |
| 34  | D6REF7    | D6REF7          | Sphingosine-1-phosphate lyase 1 GN=Sgpl1 PE=3 SV=1 - [D6REF7_MOUSE]                      | 1             | 6  | 2             | 5  | 1   | 7  | <b>4</b>          | <b>18</b> | 4.50     | 2.192E-03    | 54.7 |                           | ✓         |        |                                             |                                          |                                               |      |
| 34  | P18760    | COF1            | Cofilin-1 GN=Cfl1 PE=1 SV=3 - [COF1_MOUSE]                                               | 3             | 7  | 2             | 9  | 1   | 6  | <b>6</b>          | <b>22</b> | 3.67     | 7.182E-03    | 18.5 | ✓                         |           |        | (14)(19)(23)(26)                            |                                          |                                               |      |
| 34  | P08752    | GNAI2           | Guanine nucleotide-binding protein G(i) subunit alpha-2 GN=Gnai2 PE=1 SV=5 - [GNAI2_MK   | 1             | 3  | 1             | 5  | 1   | 3  | <b>3</b>          | <b>11</b> | 3.67     | 1.613E-02    | 40.5 | ✓                         |           |        | (20)(26)                                    |                                          |                                               |      |
| 34  | J3QPE8    | J3QPE8          | MGC16555 GN=Vdac3-ps1 PE=4 SV=1 - [J3QPE8_MOUSE]                                         | 4             | 8  | 1             | 8  | 2   | 8  | <b>7</b>          | <b>24</b> | 3.43     | 3.016E-03    | 30.7 | ✓                         |           |        |                                             |                                          |                                               |      |
| 34  | P68254-2  | 1433T           | Isoform 2 of 14-3-3 protein theta GN=Ywhaq - [1433T_MOUSE]                               | 1             | 7  | 1             | 4  | 3   | 6  | <b>5</b>          | <b>17</b> | 3.40     | 2.239E-02    | 27.7 | ✓                         |           |        | (5)(8)(23)(26)                              | (17)                                     |                                               |      |
| 34  | P51150    | RAB7A           | Ras-related protein Rab-7a GN=Rab7a PE=1 SV=2 - [RAB7A_MOUSE]                            | 2             | 7  | 3             | 10 | 3   | 9  | <b>8</b>          | <b>26</b> | 3.25     | 3.126E-03    | 23.5 | ✓                         |           |        |                                             |                                          |                                               |      |
| 34  | P08113    | ENPL            | Endoplasmic reticulum protein GN=Hsp90b1 PE=1 SV=2 - [ENPL_MOUSE]                        | 6             | 24 | 9             | 29 | 11  | 27 | <b>26</b>         | <b>80</b> | 3.08     | 9.361E-04    | 92.4 |                           | ✓         |        |                                             | (16)(17)                                 |                                               |      |

## References:

- Alfaro, J. F. et al. Tandem mass spectrometry identifies many mouse brain O-GlcNAcylated proteins including EGF domain-specific O-GlcNAc transferase targets. *Proc Natl Acad Sci USA* 109, 7280–7285 (2012).
- Boyce, M. et al. Metabolic cross-talk allows labeling of O-linked (beta)-N-acetylglucosamine-modified proteins via the N-acetylgalactosamine salvage pathway. *Proc Natl Acad Sci USA* 108, 3141–3146 (2011).
- Carlsson, S. R., Lycksell, P. O. & Fukuda, M. Assignment of O-glycan attachment sites to the hinge-like regions of human lysosomal membrane glycoproteins lamp-1 and lamp-2. *Arch. Biochem. Biophys.* 304, 65–73 (1993).
- Cieniewski-Bernard, C. Identification of O-linked N-Acetylglucosamine Proteins in Rat Skeletal Muscle Using Two-dimensional Gel Electrophoresis and Mass Spectrometry. *Mol Cell Proteomics* 3, 577–585 (2004).
- Clark, P. M. et al. Direct In-Gel Fluorescence Detection and Cellular Imaging of O-GlcNAc-Modified Proteins. *J Am Chem Soc* 130, 11576–11577 (2008).
- Dehennaut, V. et al. Identification of structural and functional O-linked N-acetylglucosamine-bearing proteins in *Xenopus laevis* oocyte. *Mol Cell Proteomics* 7, 2229–2245 (2008).
- Fujiwara, S., Shinkai, H., Mann, K. & Timpl, R. Structure and Localization. *Matrix Collagen and Related Research* 13, 215–222 (1993).
- Gurcel, C. et al. Identification of new O-GlcNAc modified proteins using a click-chemistry-based tagging. *Anal Bioanal Chem* 390, 2089–2097 (2008).
- Hahne, H. et al. Proteome Wide Purification and Identification of O-GlcNAc-Modified Proteins Using Click Chemistry and Mass Spectrometry. *J Proteome Res* 12, 927–936 (2013).
- Hubbard, S. C., Boyce, M., McVaugh, C. T., Peehl, D. M. & Bertozzi, C. R. Cell surface glycoproteomic analysis of prostate cancer-derived PC-3 cells. *Bioorg. Med. Chem. Lett.* 21, 4945–4950 (2011).
- Kaneko, M. et al. Functional sialylated O-glycan to platelet aggregation on Aggrus (T1alpha/Podoplanin) molecules expressed in Chinese hamster ovary cells. *J. Biol. Chem.* 279, 38838–38843 (2004).
- Khidekel, N. et al. Probing the dynamics of O-GlcNAc glycosylation in the brain using quantitative proteomics. *Nat Chem Biol* 3, 339–348 (2007).
- Khidekel, N., Ficarro, S., Peters, E. & Hsieh-Wilson, L. Exploring the O-GlcNAc proteome: direct identification of O-GlcNAc-modified proteins from the brain. *Proc Natl Acad Sci USA* 101, 13132–13137 (2004).
- Nandi, A. et al. Global identification of O-GlcNAc-modified proteins. *Anal Chem* 78, 452–458 (2006).
- Schjoldager, K. T. B. et al. Probing isoform-specific functions of polypeptide GalNAc-transferases using zinc finger nuclease glycoengineered SimpleCells. *Proceedings of the National Academy of Sciences* 109, 9893–9898 (2012).
- Stentoft, C. et al. ResourcePrecision mapping of the human O-GalNAc glycoproteome through SimpleCell technology. *EMBO J.* 32, 1478–1488 (2013).
- Slade, P. G., Hajivandi, M., Bartel, C. M. & Gorfien, S. F. Identifying the CHO secretome using mucin-type O-linked glycosylation and click-chemistry. *J. Proteome Res.* 11, 6175–6186 (2012).
- Sprung, R. et al. Tagging-via-substrate strategy for probing O-GlcNAc modified proteins. *J Proteome Res* 4, 950–957 (2005).
- Teo, C. F. et al. Glycopeptide-specific monoclonal antibodies suggest new roles for O-GlcNAc. *Nat Chem Biol* 6, 338–343 (2010).
- Trinidad, J. C. et al. Global identification and characterization of both O-GlcNAcylation and phosphorylation at the murine synapse. *Mol Cell Proteomics* 11, 215–229 (2012).

- 21 Vosseller, K. et al. O-linked N-acetylglucosamine proteomics of postsynaptic density preparations using lectin weak affinity chromatography and mass spectrometry. *Mol Cell Proteomics* 5, 923–934 (2006).
- 22 Wang, Z. et al. Enrichment and Site Mapping of O-Linked N-Acetylglucosamine by a Combination of Chemical/Enzymatic Tagging, Photochemical Cleavage, and Electron Transfer Dissociation Mass Spectrometry. *Mol Cell Proteomics* 9, 153–160 (2010).
- 23 Wang, Z. et al. Extensive Crosstalk Between O-GlcNAcylation and Phosphorylation Regulates Cytokinesis. *Science Signaling* 3, ra2 (2010).
- 24 Wang, Z., Pandey, A. & Hart, G. W. Dynamic Interplay between O-Linked N-Acetylglucosaminylation and Glycogen Synthase Kinase-3-dependent Phosphorylation. *Mol Cell Proteomics* 6, 1365–1379 (2007).
- 25 Wells, L. et al. Mapping sites of O-GlcNAc modification using affinity tags for serine and threonine post-translational modifications. *Mol Cell Proteomics* 1, 791–804 (2002).
- 26 Zaro, B. W., Yang, Y.-Y., Hang, H. C. & Pratt, M. R. Chemical reporters for fluorescent detection and identification of O-GlcNAc-modified proteins reveal glycosylation of the ubiquitin ligase NEDD4-1. *Proc Natl Acad Sci USA* 108, 8146–8151 (2011).
